# Supplementary material for: Latently Activated Granulocytes From an Autoimmune Uveits Model Show Divergent Pathway Activation Profiles Upon IL8 Stimulation <em>in vitro</em>
Source: Preprints.org preprint supplement (doi:10.20944/preprints202206.0031.v1), 2022-06-02
Supplement: Supplementary file 1 [file Table S1 all IDs after IL8 stimulation.xlsx]

## Sheet: Table S1 all IDs
Supplemental Table S1: all quantified protein identifications from granulocyte proteome detected by mass spectrometry analysis after IL8 stimulation (Q Exactive HF mass spectrometer online coupled to a UItimate 3000 RSLC nano-HPLC; Progenesis; Mascot). Keratin identifications were removed from Table. a Protein accession numbers as listed in Ensembl horse database (http://www.ensembl.org), b Numbe…
Accessiona	Peptide countb	Unique peptidesc	Gene symbold	IL8 ratio ERU / healthye	IL8 T-TEST ERU / healthyf
ENSECAP00000007189;ENSECAP00000002647	14	5	HNRNPA1	0.698343	0.00060473
ENSECAP00000004804	6	3	RAB8A	1.93572	0.000783746
ENSECAP00000020012	1	1	HUWE1	18.8985	0.00116192
ENSECAP00000005512	1	1	WDR72	0.560222	0.00131705
ENSECAP00000011107	3	2	VAPB	0.451247	0.00138315
ENSECAP00000020400	3	3	IST1	1.51351	0.00138415
ENSECAP00000008306	2	2	NUCKS1	0.0775024	0.00139307
ENSECAP00000008461	2	1	S100A9	60.4096	0.00151701
ENSECAP00000017921	4	4	UQCRC1	0.462436	0.00160469
ENSECAP00000015383	5	5	SEPTIN2	0.2482	0.00208976
ENSECAP00000011571	3	3	EIF3I	0.562245	0.00246618
ENSECAP00000021002	1	1	GNS	0	0.00280629
ENSECAP00000016437	8	7	KHSRP	0.350307	0.00314694
ENSECAP00000012610	6	6	PXN	0.36598	0.00324424
ENSECAP00000008459	1	1	FKBP2	0.230624	0.00349477
ENSECAP00000009471;ENSECAP00000008038	12	12	GSTO1	0.644043	0.00379077
ENSECAP00000020433;ENSECAP00000015340	21	18	SEPTIN7	0.503393	0.0041885
ENSECAP00000017991	12	12	ZYX	0.398474	0.00469744
ENSECAP00000020212	4	2	HNRNPD	0.152376	0.00523831
ENSECAP00000010733	3	3	MAPRE2	0.495467	0.00536009
ENSECAP00000018986;ENSECAP00000011224	13	13	TMOD3	0.616783	0.00559923
ENSECAP00000018892	8	7	NUDC	0.6632	0.00561696
ENSECAP00000001477	22	20	HNRNPA2B1	0.541754	0.00668265
ENSECAP00000015361	10	9	HNRNPC	0.568286	0.00675327
ENSECAP00000003176	3	3	RPL7	3.33929	0.0068331
ENSECAP00000005451;ENSECAP00000019602	18	18	NAPA	0.729353	0.00694855
ENSECAP00000011062	17	4	ALDOC	0.200589	0.00744959
ENSECAP00000018039	6	6	SEPTIN9	0.366534	0.0075186
ENSECAP00000021570	11	11	HNRNPM	0.580162	0.00819813
ENSECAP00000021754	21	19	HSPA5	0.63735	0.00823817
ENSECAP00000022537	6	6	CTSZ	0.387858	0.00869858
ENSECAP00000020618	1	1	MPPE1	46.7085	0.00889889
ENSECAP00000008091;ENSECAP00000007857	23	22	TAGLN2	0.510508	0.00906047
ENSECAP00000013745	6	6	RAB11FIP1	0.695482	0.00918293
ENSECAP00000007141	1	1	ATP5PO	0.241849	0.00931188
ENSECAP00000017279	1	1	GSK3A	2.19775	0.0100904
ENSECAP00000020635	1	1	PABPC1L	0.55381	0.0104942
ENSECAP00000008291	8	7	PGLS	0.564112	0.0106686
ENSECAP00000022856	2	1	SYNE2	8.59939	0.0112137
ENSECAP00000013349;ENSECAP00000015615	3	3	U2AF1	0.369502	0.0117876
ENSECAP00000017757	2	2	CNN3	0.446837	0.0120098
ENSECAP00000005312	5	5	HNRNPH3	0.482909	0.0123253
ENSECAP00000009706	7	4	RAB8B	2.45311	0.0130142
ENSECAP00000016965	11	7	CCT5	0.307002	0.0131678
ENSECAP00000007897	3	2	ACOT1	0.181698	0.0135141
ENSECAP00000015461	5	4	EIF4H	0.61723	0.0135514
ENSECAP00000011866	1	1	PDE4D	1.39501	0.014678
ENSECAP00000017575	1	1	ATP1B3	3.63413	0.0149111
ENSECAP00000007438	3	3	FCER1G	2.23663	0.0149451
ENSECAP00000015942;ENSECAP00000016004	10	8	SH3KBP1	0.592509	0.0151038
ENSECAP00000020223	16	14	PSMD2	1.26706	0.0152553
ENSECAP00000009806	1	1	PRKAR2B	0.204629	0.0156432
ENSECAP00000009162	2	2	SLC44A2	1.698	0.0156759
ENSECAP00000010567	3	3	MIF	0.344226	0.0161833
ENSECAP00000017418	4	3	EPS15L1	0.462098	0.0162879
ENSECAP00000014659	4	4	TES	0.666889	0.0165657
ENSECAP00000000811	1	1	B2M	0.665121	0.01715
ENSECAP00000021779	3	3	RBM3	0.647704	0.0180413
ENSECAP00000015659	2	2	PSMC6	0.527233	0.0181913
ENSECAP00000018356	15	14	CCT3	0.38773	0.0182647
ENSECAP00000007580	5	4	PLIN3	0.601466	0.0186171
ENSECAP00000009317	6	6	DHRS7	2.49722	0.0189223
ENSECAP00000019413	10	3	GNB1	0.518406	0.0194199
ENSECAP00000018238	2	1	FKBP4	0.512242	0.0195625
ENSECAP00000009833	5	5	OLR1	1.62431	0.0197472
ENSECAP00000009307;ENSECAP00000009728	8	6	FUBP1	0.42853	0.0205538
ENSECAP00000015019	7	7	LASP1	0.220763	0.0214245
ENSECAP00000014717	8	7	ERP44	0.449242	0.0221217
ENSECAP00000018334	6	6	SYTL1	0.724239	0.0221873
ENSECAP00000005609	13	12	ILK	0.477626	0.0223106
ENSECAP00000000200	4	4	GLRX3	0.4182	0.0223336
ENSECAP00000020810	7	4	RAB5B	1.45524	0.0227606
ENSECAP00000018227	20	20	ITGA2B	0.229069	0.0230473
ENSECAP00000014221;ENSECAP00000007153	13	13	PPIA	0.708003	0.0230669
ENSECAP00000012462;ENSECAP00000020981	10	8	HNRNPH1	0.522808	0.0231357
ENSECAP00000017557	6	6	DNAJB1	0.643458	0.0236343
ENSECAP00000022663	14	10	TUBB1	0.243932	0.0236379
ENSECAP00000012255	21	20	AVIL	0.184073	0.0238285
ENSECAP00000002853	3	2	LTB4R	2.14455	0.0239274
ENSECAP00000022806	7	7	APRT	0.512022	0.0242424
ENSECAP00000019023	7	6	RBMX	0.602305	0.0242983
ENSECAP00000000940	1	1	SAMD9	0.26715	0.0246298
ENSECAP00000003324;ENSECAP00000016775	7	6	CDC42	1.53262	0.0257005
ENSECAP00000014483	1	1	ARHGAP10	3.9288	0.0258043
ENSECAP00000020399	7	7	PDIA6	0.539383	0.0267983
ENSECAP00000007856	3	3	PGP	0.526097	0.0271978
ENSECAP00000009606	5	5	MMRN1	0.407947	0.0273292
ENSECAP00000020620	1	1	HINT1	0.363884	0.0274366
ENSECAP00000012031;ENSECAP00000013761	3	3	CYCS	0.575328	0.0280431
ENSECAP00000004283	3	3	MPDU1	3.00028	0.0282555
ENSECAP00000016719	8	8	PLEK	0.432785	0.0282774
ENSECAP00000010218	2	1	SYNCRIP	0.296612	0.0283812
ENSECAP00000007423;ENSECAP00000010538	43	41	THBS1	0.231544	0.0288737
ENSECAP00000015151	2	1	RAB43	2.46888	0.0288807
ENSECAP00000017419	1	1	GLRX5	0.444744	0.0289984
ENSECAP00000009178	95	91	VWF	0.267651	0.0292296
ENSECAP00000018967	1	1	KHDRBS2	0.339549	0.0295624
ENSECAP00000009007	3	3	MMP25	2.51095	0.0297296
ENSECAP00000022690	16	12	DDX17	0.648351	0.0298047
ENSECAP00000006689;ENSECAP00000014974	8	6	NONO	0.59341	0.030322
ENSECAP00000010748	5	5	MINPP1	1.7098	0.0305568
ENSECAP00000002797	2	2	CD9	1.87828	0.030687
ENSECAP00000022895;ENSECAP00000001142	9	8	MSRA	0.64131	0.030801
ENSECAP00000015236;ENSECAP00000007464	4	4	PCYT1A	0.418082	0.0308176
ENSECAP00000017129	11	10	CORO1C	0.51584	0.0320043
ENSECAP00000014603	1	1	TRMT112	0.370122	0.032364
ENSECAP00000022251	1	1	ATP5C1	0.609667	0.0324718
ENSECAP00000012410	5	3	SEC23A	0.428994	0.0327848
ENSECAP00000013949	16	15	SRI	0.623595	0.0330757
ENSECAP00000006151	3	3	TBCB	0.42037	0.0338981
ENSECAP00000011552	5	4	USO1	0.549803	0.0339067
ENSECAP00000014469	7	6	CD55	2.22521	0.0339778
ENSECAP00000008898	2	2	Cryzl2	0.262846	0.0341957
ENSECAP00000008045	1	1	RGP1	0.116223	0.0345772
ENSECAP00000013875	4	3	NT5DC2	5.23439	0.0348974
ENSECAP00000012091	3	3	ATP6AP1	3.77871	0.0350713
ENSECAP00000016516	3	3	DBI	0.42932	0.0356214
ENSECAP00000022975	3	3	HSPE1	0.362537	0.0358456
ENSECAP00000022959	3	3	GPSM3	0.472519	0.0359957
ENSECAP00000010056	2	2	COX6B1	0.185761	0.0363385
ENSECAP00000006528	1	1	KDM6A	1.51126	0.0363858
ENSECAP00000018225	8	8	PSMA2	0.489789	0.0364568
ENSECAP00000022397;ENSECAP00000022127;ENSECAP00000022652;ENSECAP00000022049	11	9	ATP1A1	1.71565	0.0364915
ENSECAP00000001213	9	9	SNX27	1.9657	0.0375089
ENSECAP00000001269	3	3	NUDT21	0.385146	0.0387497
ENSECAP00000013692	6	6	WIPF1	0.535047	0.0390294
ENSECAP00000022085	12	11	PEBP1	0.509923	0.0391355
ENSECAP00000016124;ENSECAP00000016149;ENSECAP00000004220	47	6	ACTB	1.20877	0.0402689
ENSECAP00000006356	2	1	APOE	0.0421116	0.0405878
ENSECAP00000006891	1	1	FABP5	0.412368	0.0406384
ENSECAP00000022407;ENSECAP00000004559	11	10	FABP3	0.570503	0.0412656
ENSECAP00000018467;ENSECAP00000002349	6	5	PABPC1	0.760371	0.0414088
ENSECAP00000007167	21	18	HSPD1	0.606741	0.0417827
ENSECAP00000011798	4	4	RELA	0.512117	0.041888
ENSECAP00000006443	3	3	NRBP1	0.684177	0.0420087
ENSECAP00000019582;ENSECAP00000008598	7	6	STK4	0.411963	0.0421609
ENSECAP00000009012	23	22	HSP90B1	0.66315	0.0421841
ENSECAP00000012573	3	3	CBFB	0.785901	0.0424071
ENSECAP00000001875	3	1	NAP1L4	0.323333	0.0424683
ENSECAP00000006729;ENSECAP00000002389;ENSECAP00000005370;ENSECAP00000014330;ENSECAP00000022168	10	3	RAB1B	1.558	0.0427274
ENSECAP00000012020	2	1	TNPO2	1.93758	0.0427422
ENSECAP00000007958	18	17	P4HB	0.641638	0.0428594
ENSECAP00000008026	9	7	S100A9	0.574475	0.0432292
ENSECAP00000010371	3	3	TREML1	0.169524	0.0435464
ENSECAP00000017248	1	1	NT5C1A	0.283812	0.0437281
ENSECAP00000023106	2	1	COX2	2.3517	0.0439523
ENSECAP00000009894	3	3	DAZAP1	0.422399	0.0444054
ENSECAP00000022757	1	1	TMEM14C	3.80226	0.0446533
ENSECAP00000014710	8	8	PPIB	0.696103	0.044805
ENSECAP00000000280	5	5	ERP29	0.420285	0.0449583
ENSECAP00000018764	3	3	PSMD6	1.64444	0.0450684
ENSECAP00000007496;ENSECAP00000005628	16	13	MYL12A	0.604468	0.0455645
ENSECAP00000022941;ENSECAP00000008466	4	1	DNM3	1.21293	0.0456916
ENSECAP00000022109	4	4	GLRX	0.534527	0.0458018
ENSECAP00000015661	3	2	SH2D3C	0.539028	0.0460335
ENSECAP00000003971	1	1	SCFD1	2.18889	0.046039
ENSECAP00000013531	2	1	UBE2I	0.679941	0.0460619
ENSECAP00000012986	6	6	RNASEL	2.64315	0.0465174
ENSECAP00000007313	5	4	SET	0.791352	0.0476612
ENSECAP00000019781;ENSECAP00000007334	9	5	VPS4B	0.558242	0.0476612
ENSECAP00000014097	2	2	DPP7	1.96355	0.0479549
ENSECAP00000007519	3	3	SLC16A3	4.30884	0.0480328
ENSECAP00000018316	29	5	AHCY	1.13049	0.0483333
ENSECAP00000022087	4	4	SF1	0.388316	0.0485439
ENSECAP00000019726	2	2	MLEC	0.601921	0.048652
ENSECAP00000016365	1	1	CHMP1B	0.555956	0.0487839
ENSECAP00000004498	5	5	MCU	2.85579	0.0488302
ENSECAP00000011822	1	1	DSC1	0.0961978	0.0491197
ENSECAP00000002196	11	8	RCSD1	0.578264	0.0491824
ENSECAP00000013087;ENSECAP00000020087;ENSECAP00000006375	5	5	KLC2	0.612627	0.0494907
ENSECAP00000007727	2	1	PABPC4	0.252925	0.0500332
ENSECAP00000007806	9	2	RAB1A	1.31838	0.0503661
ENSECAP00000014612	22	16	ATP6V1B2	0.800196	0.0510292
ENSECAP00000014829	13	12	PARK7	0.581596	0.0510692
ENSECAP00000006018	47	46	PTPRC	1.86996	0.0516204
ENSECAP00000022671	1	1	SLC12A6	8.3181	0.0527815
ENSECAP00000004528	2	1	NIPSNAP3A	0.35113	0.0529518
ENSECAP00000003679	2	1	FEN1	4.54758	0.052975
ENSECAP00000021088;ENSECAP00000020066	13	8	SEPTIN6	0.519994	0.0533754
ENSECAP00000014168	8	7	MTHFD1	0.668308	0.0535535
ENSECAP00000008426	2	2	NFATC2IP	0.513102	0.0540313
ENSECAP00000000832;ENSECAP00000002907	36	22	HSPA1A	0.647965	0.054392
ENSECAP00000015132	2	2	PLSCR1	2.37901	0.0545301
ENSECAP00000008315	2	1	MCTP1	0.463627	0.0548622
ENSECAP00000007080	4	4	SOD1	0.42994	0.0549469
ENSECAP00000013340	17	13	TPI1	0.66521	0.0550288
ENSECAP00000002287;ENSECAP00000012298;ENSECAP00000006033	18	14	KIF5B	0.533715	0.0554354
ENSECAP00000014854	1	1	USP3	143.671	0.0556094
ENSECAP00000020162	6	6	SNX3	0.618669	0.056549
ENSECAP00000015442	1	1	FKBP1A	0.256925	0.0566038
ENSECAP00000012156	9	9	SLC9A3R1	0.739562	0.0567033
ENSECAP00000019491	5	5	HVCN1	2.26321	0.0567927
ENSECAP00000018185	4	3	MGST1	1.78341	0.0568216
ENSECAP00000020140	2	2	STAT2	3.67047	0.0569544
ENSECAP00000011749	1	1	GNG12	1.44571	0.0570008
ENSECAP00000017462	1	1	SLC25A20	0.266367	0.0572781
ENSECAP00000008530	1	1	RER1	3.72959	0.0573277
ENSECAP00000007138	1	1	ARF1	0.449521	0.0575047
ENSECAP00000005652;ENSECAP00000005974	60	14	C3	1.72951	0.0584067
ENSECAP00000018075	28	25	PDIA3	0.682964	0.0586217
ENSECAP00000022359	1	1	RANBP3	0.513502	0.0586228
ENSECAP00000015329;ENSECAP00000014766	5	5	LIMS1	0.207627	0.058816
ENSECAP00000014940;ENSECAP00000016313	25	19	MYO1F	1.48927	0.0588735
ENSECAP00000013705	6	6	BTNL10	6.7986	0.0591569
ENSECAP00000011650	1	1	ACE	0.37974	0.0602708
ENSECAP00000014923	6	5	RSU1	0.668758	0.0603049
ENSECAP00000000148	1	1	PLP2	2.16472	0.0604006
ENSECAP00000014893	8	6	CCT4	0.468344	0.0615919
ENSECAP00000008477	1	1	AAMDC	0.346765	0.0616521
ENSECAP00000002603	1	1	REL	0.456591	0.061739
ENSECAP00000011565	4	1	ATP2A1	1.61361	0.0618743
ENSECAP00000019994;ENSECAP00000001614;ENSECAP00000011876	9	4	RAC2	1.59026	0.0619112
ENSECAP00000006544;ENSECAP00000011863	44	38	PKM	0.712445	0.0619757
ENSECAP00000010841	25	22	STOM	1.83325	0.0621004
ENSECAP00000020855	12	9	HNRNPA3	0.602257	0.0622135
ENSECAP00000020866	4	4	MOB1A	1.95011	0.0622626
ENSECAP00000014604	3	3	PSMB9	0.457901	0.0622675
ENSECAP00000012828	10	3	CAMP	0.360412	0.0623633
ENSECAP00000021235	4	4	FCHO2	0.598787	0.06286
ENSECAP00000008136;ENSECAP00000001782	6	6	RHOC	1.63075	0.0631309
ENSECAP00000019547	1	1	OTUD7A	0.785558	0.0631717
ENSECAP00000010223	4	4	DEK	0.689104	0.0633047
ENSECAP00000005241	8	7	PA2G4	0.589991	0.0647412
ENSECAP00000007737	1	1	UQCRB	0.236414	0.0649876
ENSECAP00000002798	4	4	RPN1	1.63005	0.065094
ENSECAP00000006553	25	23	FGG	0.475417	0.0660244
ENSECAP00000000501;ENSECAP00000003303	10	9	PRKAR1A	0.654775	0.0660437
ENSECAP00000005998;ENSECAP00000006075	22	22	VASP	0.649694	0.0664962
ENSECAP00000007030	9	8	SQOR	1.71218	0.0665141
ENSECAP00000020487	2	2	USP15	0.474838	0.0667627
ENSECAP00000021480	1	1	IL13RA2	3.71755	0.0668959
ENSECAP00000005189;ENSECAP00000019849	55	47	TKT	0.818262	0.0669169
ENSECAP00000021685	21	1	ITGAX	1.82671	0.0676874
ENSECAP00000009694	1	1	COX4I1	4.47583	0.0678782
ENSECAP00000014323	5	4	NANS	0.591243	0.0695046
ENSECAP00000003440	2	2	DNAJC9	0.337885	0.0695047
ENSECAP00000007047	4	4	CSRP1	0.158333	0.0705502
ENSECAP00000016180;ENSECAP00000017769	6	4	SIGLEC8	2.26595	0.0708414
ENSECAP00000004321	3	2	C5AR1	2.0859	0.0722284
ENSECAP00000012607	2	1	BRI3BP	9.10335	0.0722371
ENSECAP00000006791	10	7	PDIA4	0.349486	0.0722743
ENSECAP00000015725	4	4	LRRC59	2.04327	0.0723619
ENSECAP00000008484;ENSECAP00000006907;ENSECAP00000008085	12	11	PPP3CA	2.6954	0.072918
ENSECAP00000005697;ENSECAP00000016156	3	3	RGS19	2.26141	0.0729183
ENSECAP00000007354	3	3	PLBD2	3.05128	0.0730209
ENSECAP00000009875	4	4	SNRPB	0.495928	0.0731928
ENSECAP00000022714	5	4	GALE	0.449747	0.0732645
ENSECAP00000011508	8	4	CAMP	0.545052	0.0738204
ENSECAP00000022301;ENSECAP00000000404	12	9	SLC2A3	1.97677	0.0746697
ENSECAP00000010332	20	19	DBNL	0.574434	0.0758473
ENSECAP00000007809	4	2	ARPC5L	2.4123	0.0760059
ENSECAP00000016735	6	6	PSTPIP2	0.62845	0.0761151
ENSECAP00000004738	2	1	FUCA2	1.87259	0.0761705
ENSECAP00000020144	1	1	EIF3D	0.29298	0.0763964
ENSECAP00000002532	2	1	PSMC1	0.316548	0.0766901
ENSECAP00000005879	2	2	NUP155	0.289531	0.0769702
ENSECAP00000018411	4	3	PDLIM1	0.23368	0.0769709
ENSECAP00000004745	4	4	CXCR2	1.81881	0.0771535
ENSECAP00000016955;ENSECAP00000017203;ENSECAP00000021940;ENSECAP00000012072	6	6	PPP2R2A	0.654089	0.0774149
ENSECAP00000016546	33	30	WDR1	0.667351	0.0780183
ENSECAP00000007728	9	7	ITGAL	1.71298	0.0787744
ENSECAP00000015561;ENSECAP00000015635;ENSECAP00000019420;ENSECAP00000019323	138	122	TLN1	0.689963	0.0792324
ENSECAP00000016485	14	14	ITGB3	0.348766	0.0793108
ENSECAP00000014697	10	8	CCT7	0.406777	0.080246
ENSECAP00000010100	3	3	ALOX5AP	1.70231	0.0808749
ENSECAP00000023026;ENSECAP00000021477	7	7	EFHD2	0.669086	0.0808964
ENSECAP00000019512	14	3	PNP	2.07177	0.0809417
ENSECAP00000020899;ENSECAP00000020911	3	3	ATP8A1	4.79397	0.0810391
ENSECAP00000012341	10	3	YWHAH	0.630203	0.0827217
ENSECAP00000007497	5	4	ATP5H	0.46957	0.0841857
ENSECAP00000008771	16	13	OLFM4	1.36082	0.0843375
ENSECAP00000020389	1	1	RBM4	0.179227	0.0843566
ENSECAP00000019669	6	6	DDX58	3.78861	0.084556
ENSECAP00000005629	8	6	FAM129A	3.20093	0.085183
ENSECAP00000021220;ENSECAP00000006461	46	43	ITGB2	1.5938	0.0851871
ENSECAP00000012696	10	3	TPM1	0.760158	0.0853965
ENSECAP00000013150	2	2	SCAMP2	1.95995	0.0856107
ENSECAP00000021647	6	5	PSMA2	0.651704	0.0859258
ENSECAP00000000842	4	4	RUVBL1	0.646129	0.0859444
ENSECAP00000011454	11	9	HYOU1	0.625419	0.0862671
ENSECAP00000020278	24	21	ATP5B	0.710637	0.0869477
ENSECAP00000007434	1	1	GRHPR	8.43445	0.0870921
ENSECAP00000016000	9	8	TCP1	0.604713	0.0876027
ENSECAP00000007420	2	2	VAMP8	2.11734	0.0878958
ENSECAP00000013519;ENSECAP00000013995;ENSECAP00000013797;ENSECAP00000013894;ENSECAP00000014164	67	5	SPTBN1	0.498353	0.0885734
ENSECAP00000017389;ENSECAP00000000393;ENSECAP00000017538	12	11	CFL1	0.542705	0.0885763
ENSECAP00000011839;ENSECAP00000011956	3	2	CSTB	0.542953	0.0887289
ENSECAP00000011418;ENSECAP00000018459;ENSECAP00000008778	4	4	SLC25A5	1.6183	0.0890547
ENSECAP00000020709	6	5	GYG1	0.67991	0.0890808
ENSECAP00000015090;ENSECAP00000007795	8	7	HPRT1	0.588511	0.0891484
ENSECAP00000022309	7	6	PTPRJ	1.93254	0.089408
ENSECAP00000005610	2	2	TMX4	2.32763	0.0895692
ENSECAP00000008012	11	8	IFIT4	2.45069	0.089628
ENSECAP00000001598	8	7	HIST1H4E	2.93285	0.0896591
ENSECAP00000007976;ENSECAP00000005024;ENSECAP00000011043	10	3	GNAI3	2.25285	0.0896985
ENSECAP00000012666	1	1	TBC1D24	0.500958	0.0901292
ENSECAP00000019804	26	24	BPI	1.9663	0.0910607
ENSECAP00000015427	2	2	ENTPD3	9.55099	0.0914146
ENSECAP00000007527	10	10	DNAJA2	0.583089	0.0915662
ENSECAP00000010994	11	10	MATR3	0.439736	0.0917682
ENSECAP00000013217	3	2	VAV1	1.95176	0.0919497
ENSECAP00000022406;ENSECAP00000011717	32	31	CORO1A	0.68196	0.09277
ENSECAP00000005182	2	2	CALD1	0.192443	0.0927882
ENSECAP00000009040	12	7	SIRPA	3.60636	0.0929781
ENSECAP00000016423	13	12	PPA1	0.798306	0.0935839
ENSECAP00000017517;ENSECAP00000020027;ENSECAP00000010823;ENSECAP00000020084	4	4	FCGR2B	2.02241	0.0937946
ENSECAP00000013031;ENSECAP00000014575;ENSECAP00000013959;ENSECAP00000017674;ENSECAP00000010400;ENSECAP00000011506	9	6	CYP4F2	2.03507	0.0948598
ENSECAP00000008974;ENSECAP00000008190	37	37	VCP	0.733063	0.0950779
ENSECAP00000013931	1	1	C17orf62	8.43552	0.0955522
ENSECAP00000013951	3	3	RETN	0.464062	0.0956346
ENSECAP00000020362	16	14	IL16	0.762909	0.0956809
ENSECAP00000008133;ENSECAP00000009942	8	5	CLIP1	0.377963	0.0957312
ENSECAP00000011439	19	2	TUBB4A	0.419983	0.0958541
ENSECAP00000003339	1	1	SYT5	130.056	0.0958991
ENSECAP00000018516;ENSECAP00000019538	22	20	LDHA	1.15924	0.095924
ENSECAP00000000167	6	5	NAP1L1	0.492714	0.0959982
ENSECAP00000003793	4	1	IGL	0.280546	0.0960493
ENSECAP00000020082	9	9	DCTN2	0.545365	0.0961644
ENSECAP00000017849	1	1	ACAT1	0.3225	0.0965908
ENSECAP00000019654	6	5	PLEKHQ1	0.51307	0.0966058
ENSECAP00000008276	7	7	U2AF2	0.555057	0.0966333
ENSECAP00000021584	1	1	CREG1	0.0176564	0.0968841
ENSECAP00000012946	16	13	CAPG	0.670903	0.0983296
ENSECAP00000020868	10	8	LRCH4	0.475767	0.0993448
ENSECAP00000015015	8	6	ABCA13	2.22379	0.0993649
ENSECAP00000013659	1	1	OSBPL8	4.50691	0.0993877
ENSECAP00000020849	1	1	RPL4	41.2835	0.0999542
ENSECAP00000022282	10	10	ICAM3	1.82205	0.100349
ENSECAP00000018040	15	6	PAK2	0.545532	0.100409
ENSECAP00000019852	1	1	GALNT1	0.743708	0.10113
ENSECAP00000008217;ENSECAP00000003017	8	7	MAPRE1	0.556396	0.101358
ENSECAP00000017560	6	5	CCT6A	0.439427	0.101609
ENSECAP00000019276	17	15	ATP5A1	0.770346	0.102115
ENSECAP00000022920	2	2	PPP1R9B	0.589414	0.102197
ENSECAP00000014550	8	6	GOT2	1.39545	0.102246
ENSECAP00000006489	23	23	CALR	0.691208	0.102797
ENSECAP00000006100	9	8	GLUD1	0.760307	0.103007
ENSECAP00000007600	1	1	PGRMC1	2.13479	0.103306
ENSECAP00000008798	6	6	CYBA	2.25377	0.10334
ENSECAP00000007886	10	10	GRB2	0.573635	0.103515
ENSECAP00000015910;ENSECAP00000018182	22	18	CYBB	1.88282	0.103618
ENSECAP00000000138	3	3	WAS	0.707649	0.103639
ENSECAP00000016836	3	3	PCTP	2.59011	0.103781
ENSECAP00000022376	6	6	PSMC3	0.74818	0.104614
ENSECAP00000001470;ENSECAP00000001907	11	2	HIST2H2BF	2.99499	0.104713
ENSECAP00000022032	2	2	CUL5	11.3213	0.105464
ENSECAP00000021450	4	4	S100P	0.719371	0.106246
ENSECAP00000010063	6	6	TOM1	0.666888	0.106623
ENSECAP00000022622	8	6	RAB5C	1.34743	0.107079
ENSECAP00000014354	9	9	SRSF1	0.689708	0.107489
ENSECAP00000020068	13	6	PYGB	0.503285	0.10794
ENSECAP00000019984	1	1	WBP2	0.74215	0.109196
ENSECAP00000018408;ENSECAP00000008185	9	8	FH	0.649697	0.109237
ENSECAP00000011250	11	1	PLS3	1.81194	0.109775
ENSECAP00000001691	3	1	LUC7L	0.0314016	0.109877
ENSECAP00000007023	3	3	CKB	0.251834	0.110098
ENSECAP00000013060	1	1	RASA3	0.19625	0.110385
ENSECAP00000016471	6	5	RPN2	1.54229	0.110949
ENSECAP00000004162	7	7	PCMT1	0.696567	0.111111
ENSECAP00000003150	3	3	SKP1	0.553966	0.111442
ENSECAP00000009477	3	1	VAV3	1.31526	0.111597
ENSECAP00000013412	12	11	HCLS1	0.487017	0.111828
ENSECAP00000004469	3	3	PDHB	0.266989	0.112272
ENSECAP00000004772	3	3	LGALS3	0.513896	0.112294
ENSECAP00000020580	1	1	SLAIN1	12.3043	0.113
ENSECAP00000014810;ENSECAP00000017713	2	2	ENSA	0.0771229	0.113848
ENSECAP00000012206	2	2	ARHGEF2	1.91975	0.114312
ENSECAP00000008443;ENSECAP00000021248	6	6	DDX3X	0.707303	0.114991
ENSECAP00000008406	27	25	FGB	0.357807	0.115223
ENSECAP00000018859	1	1	KIAA0368	0.511808	0.115484
ENSECAP00000010133	3	3	SUB1	0.669641	0.115751
ENSECAP00000019520	2	2	LAMTOR1	2.23851	0.116387
ENSECAP00000003859	2	2	CACYBP	0.474265	0.116688
ENSECAP00000020783	1	1	TRPC3	2.14204	0.116724
ENSECAP00000019648	2	2	PLAUR	1.62937	0.116987
ENSECAP00000018174;ENSECAP00000018139	4	3	SEPTIN5	0.355221	0.117139
ENSECAP00000012992	4	4	CORO1B	0.291244	0.118031
ENSECAP00000021943	7	7	GLOD4	0.606895	0.118132
ENSECAP00000021468	2	2	RPA1	2.2627	0.118304
ENSECAP00000018799	5	5	EPS15	0.498235	0.119447
ENSECAP00000007735	4	4	SYPL1	1.81134	0.119653
ENSECAP00000015246	13	3	PNP	0.647905	0.120185
ENSECAP00000011246	2	2	SURF1	1.77807	0.121094
ENSECAP00000022283	3	3	SCARB2	1.61791	0.121662
ENSECAP00000014524	36	35	APOBR	0.734196	0.123447
ENSECAP00000005965	13	12	HNRNPU	0.818937	0.123728
ENSECAP00000012212	2	2	UBE2K	0.400484	0.123787
ENSECAP00000011676	3	2	PLD3	0.196311	0.12439
ENSECAP00000016002;ENSECAP00000015755	19	16	MYL6	0.583414	0.124705
ENSECAP00000008313	1	1	DEAF1	0.734829	0.125143
ENSECAP00000019435	1	1	RPL18	13.9059	0.125752
ENSECAP00000021813	1	1	TSTD3	0.355934	0.125851
ENSECAP00000004352	2	2	MOGAT1	4.9111	0.126177
ENSECAP00000011500	41	30	HSPA8	0.699698	0.126511
ENSECAP00000007315	1	1	CEP128	0.635125	0.126586
ENSECAP00000013470	2	2	DPY19L1	2.0186	0.126796
ENSECAP00000020738	19	17	MDH2	0.692684	0.127561
ENSECAP00000016688;ENSECAP00000018492;ENSECAP00000018630;ENSECAP00000014530	3	3	RDH16	6.35752	0.127782
ENSECAP00000009685	4	4	SH3BGRL3	0.627783	0.127988
ENSECAP00000017140	1	1	PEX13	6.7141	0.128037
ENSECAP00000000561	2	1	TAF15	0.543924	0.128289
ENSECAP00000008444;ENSECAP00000020175;ENSECAP00000002289	9	9	EIF5A	0.551834	0.128478
ENSECAP00000014625;ENSECAP00000012317	5	5	RALA	1.54728	0.12933
ENSECAP00000005144	6	6	PSMB4	0.697859	0.129623
ENSECAP00000008635	1	1	RPL35A	9.78763	0.129744
ENSECAP00000013827	1	1	TRAPPC11	9.81231	0.129928
ENSECAP00000009745	5	4	RPIA	0.37146	0.130131
ENSECAP00000020606	7	5	RAB10	1.78513	0.130396
ENSECAP00000019206	23	22	DIAPH1	0.731253	0.130489
ENSECAP00000017333	25	23	GSN	0.509961	0.130889
ENSECAP00000008007	19	17	FGA	0.357964	0.131713
ENSECAP00000010255	1	1	CDS2	4.67965	0.132026
ENSECAP00000003332	34	21	ALDOA	0.627042	0.132078
ENSECAP00000011786	6	6	TPD52	0.687336	0.132567
ENSECAP00000007934	2	2	BUB3	0.457905	0.133758
ENSECAP00000008536	2	2	GPR97	0.55993	0.134032
ENSECAP00000008467	1	1	WDR97	0.578985	0.135201
ENSECAP00000006904	4	4	GIT2	0.670848	0.135919
ENSECAP00000011089	5	5	HRG	0.496645	0.135938
ENSECAP00000005824	2	1	BIN1	10.4989	0.136295
ENSECAP00000005375	11	10	STIP1	0.706207	0.136383
ENSECAP00000017973;ENSECAP00000003886	17	10	YWHAB	0.806134	0.136444
ENSECAP00000012548	2	2	RPS13	2.63457	0.136572
ENSECAP00000016033	3	3	TYROBP	2.30683	0.136848
ENSECAP00000002991	21	1	ACTBL2	14.9758	0.13745
ENSECAP00000009754	1	1	TIMP2	0.508879	0.138246
ENSECAP00000014376	2	1	CPNE6	0.0572915	0.13864
ENSECAP00000008037	4	3	ACP1	0.56771	0.139055
ENSECAP00000001190	12	1	PFN1	0.37237	0.139938
ENSECAP00000016034	35	33	ITGAM	1.33124	0.139943
ENSECAP00000003384	1	1	IGLC7	0.303711	0.140085
ENSECAP00000020205	1	1	HUWE1	7.02847	0.140805
ENSECAP00000010401	1	1	LMAN2	2.75421	0.141019
ENSECAP00000019764	2	2	DOK3	0.614663	0.141168
ENSECAP00000004767	2	2	EIF1AX	0.274832	0.141261
ENSECAP00000017136	1	1	ARF3	1.96437	0.141616
ENSECAP00000021561	2	2	AGAP2	3.75096	0.141778
ENSECAP00000005316	4	4	CELF2	0.336678	0.14179
ENSECAP00000011252	5	4	ADPRHL2	0.459121	0.142186
ENSECAP00000004827	1	1	RPS10	2.00519	0.142437
ENSECAP00000012739	6	5	USP5	0.62947	0.142979
ENSECAP00000007999;ENSECAP00000009261;ENSECAP00000018295	15	14	DPYSL2	0.608239	0.143152
ENSECAP00000017277	4	4	PTK2B	0.627762	0.144055
ENSECAP00000004429;ENSECAP00000004360	3	3	FPR2	4.15017	0.144151
ENSECAP00000018194	1	1	ALDH5A1	7.49271	0.144292
ENSECAP00000011406	3	3	PIK3AP1	0.448156	0.145067
ENSECAP00000015087	5	1	EHD4	3.94902	0.145432
ENSECAP00000012813	6	5	PFAS	0.484204	0.145966
ENSECAP00000001701	1	1	GP1BA	0.301299	0.146275
ENSECAP00000010755	2	2	CLTA	0.646912	0.146341
ENSECAP00000017058	5	4	MICAL1	0.583054	0.146987
ENSECAP00000021973	1	1	PGRMC2	5.17474	0.147074
ENSECAP00000012291	2	2	GALM	0.492661	0.147407
ENSECAP00000000741	2	2	EMB	2.97148	0.147607
ENSECAP00000021385	1	1	BAK1	14.2149	0.147731
ENSECAP00000014676	10	9	FLNB	0.723586	0.148366
ENSECAP00000009850	2	2	HMGN5	0.463443	0.148431
ENSECAP00000017180	4	3	PICALM	1.44494	0.148553
ENSECAP00000003835	10	3	RAP1B	1.54214	0.148608
ENSECAP00000017708	3	3	PSMD14	0.595415	0.148926
ENSECAP00000007484;ENSECAP00000007552;ENSECAP00000017553	11	11	ANKRD44	0.665109	0.149681
ENSECAP00000015167	8	8	EMR1	1.47809	0.150323
ENSECAP00000011936	1	1	VAMP2	2.00656	0.150784
ENSECAP00000020201	2	2	ITGB1	0.463449	0.150861
ENSECAP00000007841	4	4	THY1	1.82852	0.150899
ENSECAP00000012488	1	1	LBP	0.535866	0.151358
ENSECAP00000000376;ENSECAP00000011970	6	6	COPG1	0.773031	0.15196
ENSECAP00000009614;ENSECAP00000019657	5	4	BZW1	3.34414	0.152093
ENSECAP00000019847	7	7	PSMA6	0.728034	0.152284
ENSECAP00000017307	10	9	OSTF1	0.64273	0.15263
ENSECAP00000011573	2	2	RBM39	0.444577	0.152917
ENSECAP00000003374	15	14	CANX	1.41644	0.153486
ENSECAP00000017390	4	1	HLA-G	2.72572	0.15476
ENSECAP00000017429	5	5	GALK1	0.434889	0.154941
ENSECAP00000013907	1	1	C4orf3	9.92557	0.15507
ENSECAP00000012558	14	13	EEF1G	1.32366	0.155094
ENSECAP00000014991	3	3	SAMSN1	0.542759	0.155235
ENSECAP00000006001	2	2	NCK1	0.19025	0.155653
ENSECAP00000019399;ENSECAP00000001423	2	2	TPD52L2	0.690288	0.156801
ENSECAP00000006194	1	1	S100A4	0.379323	0.157516
ENSECAP00000021424	3	3	RTCB	0.542103	0.157711
ENSECAP00000006401;ENSECAP00000009322;ENSECAP00000015279	28	25	LMNB1	0.72357	0.157829
ENSECAP00000018360	3	3	PSMD10	0.546584	0.158679
ENSECAP00000002711	8	8	PSTPIP1	0.477877	0.158687
ENSECAP00000004396	5	4	TMEM43	2.77574	0.158775
ENSECAP00000012746	15	15	ATIC	0.726077	0.158953
ENSECAP00000004482;ENSECAP00000004952	2	1	PACS1	3.72169	0.15906
ENSECAP00000016785	3	3	NUDT4	0.593759	0.159186
ENSECAP00000017995;ENSECAP00000020664;ENSECAP00000013464;ENSECAP00000000134	7	5	RAB3D	1.62337	0.159204
ENSECAP00000021673;ENSECAP00000022382	10	10	SIGLEC5	1.81379	0.15969
ENSECAP00000006395;ENSECAP00000020124	6	6	CHMP4B	0.661468	0.159835
ENSECAP00000019130;ENSECAP00000015861;ENSECAP00000013919	4	3	STMN1	0.68833	0.160365
ENSECAP00000008826	4	3	NSF	0.335595	0.160391
ENSECAP00000009680	9	8	CCT8	0.790161	0.160688
ENSECAP00000017959	5	5	HSPB1	0.250658	0.1608
ENSECAP00000020693	3	2	RBBP4	0.518696	0.161455
ENSECAP00000018662	1	1	RPL11	0.469218	0.161494
ENSECAP00000012864	2	1	GYS2	0.142064	0.161942
ENSECAP00000009031	13	4	TPM3	0.650219	0.162188
ENSECAP00000019797;ENSECAP00000006138	9	8	CASP3	1.34565	0.16228
ENSECAP00000010988	3	3	RHAG	19.3321	0.162369
ENSECAP00000007524	6	6	LRMP	0.601996	0.163579
ENSECAP00000013580	1	1	CUL2	0.276063	0.164135
ENSECAP00000022327	4	4	SH3GL1	0.649052	0.165197
ENSECAP00000010534	8	8	COTL1	0.698947	0.165847
ENSECAP00000021888	2	1	RTN1	1.82683	0.166351
ENSECAP00000000335	8	7	RAB44	0.664676	0.166365
ENSECAP00000016648	1	1	MAML3	1.64987	0.166661
ENSECAP00000002768	1	1	AIFM1	0.373951	0.166768
ENSECAP00000000044	2	2	TCEB1	0.668113	0.167501
ENSECAP00000003646	2	2	G3BP1	0.233905	0.167506
ENSECAP00000009690	13	11	GMIP	0.672115	0.167669
ENSECAP00000014282	2	2	LYPLA1	0.5331	0.167713
ENSECAP00000005102	2	1	NMI	0.910206	0.167816
ENSECAP00000004056;ENSECAP00000019419	4	4	IL1RN	0.334293	0.168006
ENSECAP00000016917	2	2	GAS7	0.261846	0.168088
ENSECAP00000021995	1	1	IPO9	2.36472	0.168167
ENSECAP00000004744	1	1	SCPEP1	0.731932	0.168174
ENSECAP00000007772;ENSECAP00000020952	14	13	HIP1R	0.640035	0.168261
ENSECAP00000004686;ENSECAP00000007444;ENSECAP00000021536	5	2	ATP2B4	2.67852	0.169161
ENSECAP00000019998	8	6	GNB2L1	0.655525	0.169249
ENSECAP00000003048	12	11	IFIT1	3.39055	0.169259
ENSECAP00000013731	1	1	CASP7	2.36025	0.169372
ENSECAP00000006863	2	2	OAS3	1.86078	0.170312
ENSECAP00000010617	1	1	ECHS1	0.257124	0.170571
ENSECAP00000006580	1	1	RPLP1	0.132126	0.172175
ENSECAP00000021890	3	3	CASP1	0.439167	0.172762
ENSECAP00000013667;ENSECAP00000013775	11	10	FGD3	0.861397	0.174215
ENSECAP00000016198;ENSECAP00000017417	7	5	FOLR2	2.08038	0.1744
ENSECAP00000013141	12	11	NCKAP1L	1.49031	0.175674
ENSECAP00000021181	3	3	NUDT5	0.610347	0.175736
ENSECAP00000020819	7	7	PSMC5	0.725233	0.175888
ENSECAP00000016307	1	1	TTLL9	0.650111	0.177258
ENSECAP00000007722	8	7	SACM1L	1.699	0.178329
ENSECAP00000017686	10	9	SNRNP200	1.43129	0.178851
ENSECAP00000015423	31	25	EPX	1.86601	0.179238
ENSECAP00000007924	4	3	SCRN2	1.45846	0.179288
ENSECAP00000014882	11	10	STAT3	1.54639	0.179702
ENSECAP00000011096	5	5	CD48	1.46559	0.18025
ENSECAP00000021903	1	1	TAF2	0.569675	0.180751
ENSECAP00000022569	2	2	TXNDC17	0.580261	0.181155
ENSECAP00000009429	144	121	FLNA	0.747782	0.181166
ENSECAP00000010036	1	1	CDIPT	4.12251	0.181406
ENSECAP00000013197	4	4	TAPBP	1.60123	0.182475
ENSECAP00000010333	8	7	SH3BGRL	0.591214	0.182766
ENSECAP00000020197	1	1	BCAP31	1.28934	0.182889
ENSECAP00000000203	1	1	GGT1	4.84967	0.183067
ENSECAP00000011661	1	1	DOT1L	infinity	0.183578
ENSECAP00000004872	1	1	RRM2B	1.72439	0.183872
ENSECAP00000014484	2	2	HEBP1	0.669286	0.183879
ENSECAP00000000426	1	1	COX7A2L	infinity	0.184302
ENSECAP00000013264	2	2	MBOAT7	3.76379	0.184399
ENSECAP00000016240	12	11	GPD2	1.32268	0.184624
ENSECAP00000004344;ENSECAP00000013902	7	4	HPCAL1	0.651595	0.184688
ENSECAP00000017068	14	12	ELMO1	1.20478	0.184752
ENSECAP00000009252	1	1	EMR3	0	0.185109
ENSECAP00000002795	5	5	EVI2B	1.45026	0.185327
ENSECAP00000014528;ENSECAP00000014506	10	10	FYB	0.57934	0.185465
ENSECAP00000020008	94	86	SPTA1	2.57378	0.185943
ENSECAP00000021733	5	5	MTPN	0.658519	0.18614
ENSECAP00000011452;ENSECAP00000008804	16	16	CAND1	1.2515	0.18676
ENSECAP00000004638;ENSECAP00000008755;ENSECAP00000001617	37	26	VIM	0.784871	0.186965
ENSECAP00000001879	2	1	NAT1	0.485921	0.187368
ENSECAP00000013194	1	1	C11orf73	infinity	0.187783
ENSECAP00000016275	4	4	ALYREF	0.67285	0.187788
ENSECAP00000023048	2	2	RGS14	0.705264	0.187805
ENSECAP00000021362	1	1	PI4KA	9.40123	0.188885
ENSECAP00000020368	9	8	RHOG	1.43477	0.188952
ENSECAP00000021639	9	7	HNRNPUL1	1.49199	0.189713
ENSECAP00000019328	1	1	DCK	1.77634	0.189828
ENSECAP00000020260;ENSECAP00000012806;ENSECAP00000015221	15	14	EPB41	3.51512	0.190334
ENSECAP00000003734	4	1	COMT	3.34866	0.190483
ENSECAP00000005873	2	2	MAP4K2	5.12157	0.190821
ENSECAP00000014754	1	1	RANBP1	0.664426	0.191534
ENSECAP00000011546	5	1	DES	infinity	0.191656
ENSECAP00000019087	2	1	DLAT	0.332711	0.192135
ENSECAP00000013906	10	8	ST13	5.68932	0.193037
ENSECAP00000013529	11	1	PPP1CB	0.712757	0.193185
ENSECAP00000017024	3	1	CYP4F3	1.96702	0.193507
ENSECAP00000007175	3	3	LAMTOR2	0.552794	0.194111
ENSECAP00000016737	1	1	TECR	3.43772	0.194115
ENSECAP00000001275	5	5	CEACAM1	2.37318	0.195082
ENSECAP00000001252	1	1	SARNP	0.490018	0.195328
ENSECAP00000006808	4	3	SRSF7	0.761556	0.195352
ENSECAP00000012905	2	1	EIF4G2	2.61363	0.195884
ENSECAP00000005171	4	4	TGM2	1.64656	0.19754
ENSECAP00000014336	6	5	NNT	2.40159	0.197702
ENSECAP00000009649	1	1	HGF	3.37048	0.197904
ENSECAP00000015098	4	3	TBXAS1	0.471646	0.197963
ENSECAP00000021407	4	4	PRKCSH	0.604367	0.198326
ENSECAP00000011356	2	2	CD53	2.80632	0.198421
ENSECAP00000002633	2	2	TMX1	1.8417	0.198452
ENSECAP00000006495	5	4	TARDBP	0.759982	0.198755
ENSECAP00000015762	8	5	PGLYRP1	0.645355	0.199933
ENSECAP00000019566	3	3	NPM1	0.589028	0.20191
ENSECAP00000006260;ENSECAP00000010606	4	4	HSD17B11	3.80057	0.201981
ENSECAP00000007559	6	4	PPP3R1	0.766153	0.202206
ENSECAP00000002049	1	1	DOCK10	1.95694	0.202389
ENSECAP00000009192	1	1	AP1S2	3.36408	0.203231
ENSECAP00000016103	1	1	NUP43	0.277967	0.203331
ENSECAP00000013440;ENSECAP00000016054	6	5	ABI1	0.634401	0.203654
ENSECAP00000018127	3	2	GZMB	2.46786	0.203974
ENSECAP00000009453	7	6	NAGA	0.642849	0.204211
ENSECAP00000019374	1	1	NMNAT3	0.555235	0.204615
ENSECAP00000019303	5	5	UGGT1	1.75689	0.204673
ENSECAP00000005617;ENSECAP00000015056	40	34	MPO	1.62493	0.205031
ENSECAP00000011185	9	8	ADD1	1.58924	0.205813
ENSECAP00000006635	18	14	FERMT3	0.731546	0.205843
ENSECAP00000017290	1	1	SNRPF	0.751613	0.206769
ENSECAP00000021516	7	6	BCL2L15	0.82512	0.206781
ENSECAP00000001063	1	1	TRMT10C	0.706482	0.206897
ENSECAP00000010494	4	3	CBX3	0.710491	0.206901
ENSECAP00000004460	1	1	HAGH	0.592957	0.206954
ENSECAP00000018044	1	1	CISD2	3.00911	0.206999
ENSECAP00000013354	1	1	NAV1	0.717811	0.207218
ENSECAP00000018137	2	2	TFG	0.633432	0.208041
ENSECAP00000013990	65	3	SPTBN1	0.697373	0.20825
ENSECAP00000021722	2	1	ALDH1L2	0.592415	0.20834
ENSECAP00000012027	2	2	DNAJB11	0.641271	0.208767
ENSECAP00000003479	15	15	BASP1	1.19812	0.208915
ENSECAP00000020316;ENSECAP00000020303;ENSECAP00000009473	15	15	APBB1IP	0.732174	0.209572
ENSECAP00000019163	3	2	TSPO	5.08847	0.209759
ENSECAP00000008838	3	3	PSMD3	1.89456	0.210622
ENSECAP00000018148;ENSECAP00000003695;ENSECAP00000000791;ENSECAP00000022685;ENSECAP00000019868	16	16	EEF1A1	0.814892	0.210852
ENSECAP00000016586	10	10	S100A11	0.782669	0.210921
ENSECAP00000008564	1	1	EIF6	0.469391	0.211549
ENSECAP00000005564	2	2	TOP2B	1.58914	0.212611
ENSECAP00000007282	19	19	CAPZB	0.800789	0.212757
ENSECAP00000015414	9	9	PRDX5	0.720937	0.212823
ENSECAP00000001295	1	1	SUMO2	0.655906	0.213896
ENSECAP00000008309	2	2	NECAP2	0.560831	0.215915
ENSECAP00000022299	3	2	GBAS	0.681301	0.216477
ENSECAP00000014656	2	2	CHMP4A	0.454425	0.217256
ENSECAP00000019866	1	1	ARFIP1	0.35891	0.217558
ENSECAP00000019406	10	9	PSAP	0.739495	0.218507
ENSECAP00000015590	1	1	DDX43	0.531403	0.218556
ENSECAP00000006156	6	5	EEF1D	0.774494	0.218629
ENSECAP00000011087	25	23	ANXA2	1.3169	0.218643
ENSECAP00000016992	1	1	BLMH	1.50238	0.219048
ENSECAP00000017809	1	1	COMMD8	1.39665	0.219241
ENSECAP00000018882	2	2	C1orf123	0.451291	0.220762
ENSECAP00000000295	3	3	AP2M1	3.287	0.220807
ENSECAP00000016293	1	1	CPA4	0	0.221039
ENSECAP00000021205	1	1	CAMK1	0.151181	0.221643
ENSECAP00000015403	1	1	COL4A3BP	0.552732	0.222948
ENSECAP00000006807	3	3	SPN	2.42938	0.223756
ENSECAP00000010083;ENSECAP00000002891	4	3	ALDH3A2	2.0741	0.224049
ENSECAP00000011888	2	2	AHNAK	0.41388	0.224077
ENSECAP00000018982;ENSECAP00000017126	2	1	GBP1	6.82621	0.224546
ENSECAP00000019598	9	9	NCL	0.662389	0.224816
ENSECAP00000011940	1	1	NINJ1	24.232	0.224919
ENSECAP00000017306	60	56	CLTC	0.804955	0.225047
ENSECAP00000009546	4	4	PSMA3	0.691573	0.225264
ENSECAP00000006049	2	2	COX5B	0.295651	0.225456
ENSECAP00000019375	7	7	LCP2	0.65848	0.225892
ENSECAP00000012312	7	5	PAFAH1B1	0.728866	0.226067
ENSECAP00000010895	4	4	SUCLG1	0.625129	0.226723
ENSECAP00000006894;ENSECAP00000009163	2	2	NSEP1	6.65464	0.227203
ENSECAP00000005709	7	7	TNFAIP8L2	1.55995	0.227415
ENSECAP00000000374;ENSECAP00000013154	20	1	TUBB2B	3.27133	0.227541
ENSECAP00000020918	4	4	VPS26B	1.21297	0.227605
ENSECAP00000004873	2	2	PIN1	0.590131	0.227933
ENSECAP00000007625	1	1	CSTF2	0.573685	0.228123
ENSECAP00000010945	2	2	WFS1	0.529032	0.228384
ENSECAP00000016814	1	1	STYXL1	2.77356	0.228436
ENSECAP00000005456	1	1	CD300LF	18.2201	0.228437
ENSECAP00000017387	6	6	PTPN1	0.821598	0.228888
ENSECAP00000018267	1	1	MRPS25	0.357941	0.229339
ENSECAP00000017658	3	3	ATP8B4	1.44779	0.229477
ENSECAP00000015326	1	1	WWC2	2.31744	0.229515
ENSECAP00000008741	8	5	PGLYRP1	0.57235	0.229608
ENSECAP00000001048	2	2	SAMD9L	4.81494	0.230406
ENSECAP00000000764	4	4	NPL	0.543791	0.230628
ENSECAP00000011707	5	5	IFI30	0.469238	0.230932
ENSECAP00000017082	1	1	DPY30	0.349448	0.231499
ENSECAP00000000933	1	1	MYADM	8.77511	0.2324
ENSECAP00000010143	2	2	ATE1	2.35698	0.232941
ENSECAP00000006171	2	2	PSMD8	1.46328	0.232992
ENSECAP00000012848	2	2	NACA	0.450122	0.23366
ENSECAP00000009844	1	1	TMEM128	0.252711	0.234188
ENSECAP00000005204	1	1	CUTC	7.2288	0.23442
ENSECAP00000021774	1	1	CHCHD2	0.196514	0.234445
ENSECAP00000008924	1	1	VPS37B	0.819615	0.234537
ENSECAP00000002368	7	7	OTUB1	0.706725	0.235161
ENSECAP00000012929	37	33	PGK1	0.803457	0.236024
ENSECAP00000014938	4	4	PPP1R7	0.627049	0.236291
ENSECAP00000010818	4	1	ARL8B	3.28005	0.236783
ENSECAP00000010525	2	2	MYO3A	1.40115	0.236844
ENSECAP00000007060	3	3	POR	0.76095	0.236938
ENSECAP00000018212	1	1	ECHDC1	0.195573	0.237871
ENSECAP00000014750	12	9	CAPZA1	0.663919	0.238712
ENSECAP00000014172	1	1	RPL9	3.74057	0.239103
ENSECAP00000005062	3	3	NSFL1C	0.484492	0.239115
ENSECAP00000007582	17	14	YWHAE	0.804096	0.239162
ENSECAP00000018706	2	2	SEC11A	1.71773	0.239338
ENSECAP00000017792	11	11	SKAP2	0.743176	0.239554
ENSECAP00000015947	4	4	EIF2S1	0.58028	0.239799
ENSECAP00000011446	1	1	RBM25	infinity	0.240051
ENSECAP00000005602	7	7	PPP2R4	1.35085	0.24014
ENSECAP00000001381	4	4	KCTD12	0.655361	0.240556
ENSECAP00000018392	5	1	UTRN	0.594303	0.240745
ENSECAP00000017134	5	4	NUDT9	0.576734	0.240803
ENSECAP00000007297	9	8	PARVB	0.684625	0.241098
ENSECAP00000020897	4	3	DHX15	1.61011	0.241859
ENSECAP00000010044	2	2	UBE4A	1.43353	0.242189
ENSECAP00000018085	4	4	GM2A	0.727232	0.242205
ENSECAP00000015605	8	7	CCDC88B	0.766276	0.24247
ENSECAP00000001729;ENSECAP00000020529	2	1	EPHA5	0.737681	0.242806
ENSECAP00000011179	1	1	PACSIN1	0.158242	0.243119
ENSECAP00000020401	11	8	SMC3	1.09745	0.243341
ENSECAP00000010335	1	1	PF4	0.415508	0.243953
ENSECAP00000014858	1	1	PPIP5K2	1.55381	0.244169
ENSECAP00000014560	2	2	NUMB	0.547755	0.24531
ENSECAP00000003559	2	2	KCTD16	0.631152	0.245837
ENSECAP00000001950	3	1	HIST1H1A	2.67662	0.246023
ENSECAP00000012428	28	23	UBA1	1.29396	0.246056
ENSECAP00000016378	4	3	SRSF3	0.75218	0.246216
ENSECAP00000018396	1	1	PSPH	0.620634	0.246224
ENSECAP00000009457	2	2	BCL2L2-PABPN1	0.552468	0.246483
ENSECAP00000020253;ENSECAP00000020229	84	79	SPTAN1	0.718365	0.247591
ENSECAP00000011640	60	54	VCL	0.823947	0.247661
ENSECAP00000008035	6	6	PYCARD	0.781572	0.247679
ENSECAP00000013085	11	7	CAB39	1.4235	0.247824
ENSECAP00000007833;ENSECAP00000006198	13	10	CLIC1	1.08887	0.248669
ENSECAP00000011887	1	1	TMEM30A	2.11644	0.248967
ENSECAP00000007262	5	5	FAM63A	0.679463	0.249563
ENSECAP00000004943	4	2	SIGLEC5	2.014	0.249645
ENSECAP00000010314	1	1	WDR44	11.215	0.250284
ENSECAP00000016652	3	3	GABPA	2.09432	0.25031
ENSECAP00000007187	1	1	SLCO4C1	5.80987	0.251104
ENSECAP00000008233	1	1	P2RX1	3.59142	0.251358
ENSECAP00000014144	6	6	OLA1	0.831326	0.251576
ENSECAP00000015931	12	12	LYZ	0.75723	0.251601
ENSECAP00000002874	2	2	QUARS1	0.566379	0.25205
ENSECAP00000021166	1	1	ATP5MG	2.31283	0.25249
ENSECAP00000009061	5	5	ATP6V1G1	0.718377	0.252505
ENSECAP00000010153	1	1	PNPLA2	0.413265	0.25259
ENSECAP00000000342	5	5	CMPK1	0.764954	0.25289
ENSECAP00000015816	1	1	RPRD1B	1.46936	0.253453
ENSECAP00000018272	8	7	RNH1	0.580342	0.254457
ENSECAP00000014020	4	4	EIF4A3	0.780628	0.254719
ENSECAP00000006507	1	1	COG1	0.503728	0.255014
ENSECAP00000001771;ENSECAP00000015511	12	9	PCBP1	0.740356	0.255293
ENSECAP00000008674;ENSECAP00000018664	3	2	ADGRE2	1.74538	0.255834
ENSECAP00000013637	43	6	ACTB	1.18494	0.257175
ENSECAP00000019030	4	2	RPS6KA2	0.761079	0.257282
ENSECAP00000017516	10	9	ARCN1	0.732699	0.257689
ENSECAP00000022220	36	31	CAP1	0.852975	0.257824
ENSECAP00000006923	4	3	PPP5C	1.33221	0.259212
ENSECAP00000008805	2	2	ETHE1	0.495004	0.259279
ENSECAP00000010930	1	1	L1TD1	2.21829	0.259473
ENSECAP00000007656	2	2	RPS3A	1.32523	0.260134
ENSECAP00000014785	11	3	GNB2	0.792457	0.261166
ENSECAP00000018104	7	6	PPP1R12A	0.78922	0.261617
ENSECAP00000018151	1	1	GOLGA7	1.79901	0.262019
ENSECAP00000008703	4	4	FAM107B	0.632773	0.262675
ENSECAP00000008329	1	1	CCDC59	1.82925	0.262931
ENSECAP00000007810	8	7	UBE2N	0.720554	0.263134
ENSECAP00000002129	9	2	HIST1H3A	1.30042	0.263574
ENSECAP00000001497	4	4	VBP1	0.658289	0.264327
ENSECAP00000007348	2	2	CLINT1	0.72481	0.265102
ENSECAP00000022335	2	2	RECQL	2.69503	0.266207
ENSECAP00000020052	19	18	EPB42	5.3503	0.266285
ENSECAP00000016914	1	1	ELAVL1	0.0764516	0.267268
ENSECAP00000008115;ENSECAP00000010408	20	20	SERPINB1	0.764612	0.267701
ENSECAP00000007942	1	1	LIMK2	0.131096	0.268234
ENSECAP00000018564	2	2	DDT	0.737025	0.26837
ENSECAP00000009823	1	1	SOD2	0.238266	0.26885
ENSECAP00000022808;ENSECAP00000014458;ENSECAP00000015231;ENSECAP00000006736	45	43	DYNC1H1	1.58209	0.269793
ENSECAP00000016677	1	1	C12orf5	0.552901	0.270235
ENSECAP00000012974	12	5	EHD3	0.782445	0.271001
ENSECAP00000008720;ENSECAP00000004158	14	11	PGAM4	0.815837	0.27158
ENSECAP00000001984	1	1	RFX7	0.617571	0.27161
ENSECAP00000013758	1	1	SLPI	0.596162	0.272028
ENSECAP00000009058	10	9	HDGF	0.727207	0.27215
ENSECAP00000018633	13	2	PFN1	0.637753	0.272381
ENSECAP00000016975	3	3	KHDRBS1	2.96378	0.2731
ENSECAP00000009840	2	2	RTN4	2.77091	0.273588
ENSECAP00000020497;ENSECAP00000007794	11	10	PLXNC1	1.44661	0.273946
ENSECAP00000013133	1	1	NFKB1	0.547139	0.274672
ENSECAP00000015208	3	3	PPT1	0.528419	0.275251
ENSECAP00000016548	4	4	PSMB8	0.756284	0.27533
ENSECAP00000006035	1	1	CBX1	0.683648	0.275407
ENSECAP00000008167	1	1	ADAMTSL3	5.29774	0.27544
ENSECAP00000014833	3	3	DDX1	0.462396	0.275711
ENSECAP00000011239	4	4	NAGK	0.768874	0.27575
ENSECAP00000020502	4	2	GMPR	0.534288	0.27625
ENSECAP00000022192	1	1	CD81	2.2865	0.277438
ENSECAP00000010291;ENSECAP00000021040	90	81	SPTB	4.00188	0.277519
ENSECAP00000008608	9	8	SLK	0.780938	0.277766
ENSECAP00000019986	13	12	PRDX6	1.14555	0.278635
ENSECAP00000019624	1	1	SNF8	0.340782	0.278743
ENSECAP00000005643	2	1	TAOK3	0.678053	0.280485
ENSECAP00000009288	9	8	PPP2CA	1.18237	0.280569
ENSECAP00000015308	3	3	PHB	0.742061	0.280969
ENSECAP00000019710	10	9	FLOT1	0.628093	0.281094
ENSECAP00000007861	3	3	DCXR	1.66731	0.281152
ENSECAP00000012443	4	4	ACAT2	0.667098	0.281479
ENSECAP00000021001	7	1	DNM1	0.359133	0.282171
ENSECAP00000012616	1	1	MRPL16	0.724987	0.28237
ENSECAP00000014090	10	10	PPM1F	0.803656	0.283136
ENSECAP00000005923	5	3	HSPA9	0.670593	0.283495
ENSECAP00000017229	20	9	AP1B1	9.69603	0.283575
ENSECAP00000019628	2	2	STRN	0.52051	0.283964
ENSECAP00000015960;ENSECAP00000012490	8	6	HNRNPAB	0.694087	0.284126
ENSECAP00000021509	7	6	CSTA	0.293417	0.284451
ENSECAP00000009139;ENSECAP00000010772;ENSECAP00000011091	22	21	PADI4	0.847331	0.284497
ENSECAP00000016477	2	2	STEAP4	0.156535	0.28497
ENSECAP00000004926	2	1	SLC43A3	3.96807	0.285449
ENSECAP00000007456	18	18	PGM2	1.33008	0.285747
ENSECAP00000018461	3	3	PLCB2	0.69869	0.285963
ENSECAP00000000168	2	2	CYB5B	1.90586	0.28622
ENSECAP00000022980;ENSECAP00000019311	2	2	OGFR	15.4093	0.286261
ENSECAP00000013321	1	1	HSPE1-MOB4	0.425978	0.286289
ENSECAP00000010352;ENSECAP00000017584	5	5	ARHGEF6	0.715153	0.286441
ENSECAP00000019349	4	4	TXNL1	0.635767	0.287991
ENSECAP00000022578	1	1	R3HCC1	0.605728	0.288288
ENSECAP00000017347	2	2	VCAN	1.47265	0.288644
ENSECAP00000000926;ENSECAP00000007983	2	2	MAP1LC3B	0.242849	0.289547
ENSECAP00000009933	3	2	ATP5D	0.78851	0.289953
ENSECAP00000013127	1	1	EIF3L	2.28698	0.289959
ENSECAP00000010608	1	1	PAG1	5.02121	0.289994
ENSECAP00000012056	1	1	RNF31	0.705291	0.290198
ENSECAP00000001076	1	1	RPL15	6.43396	0.290812
ENSECAP00000016190	18	9	PPP2R1A	0.800954	0.291333
ENSECAP00000016386	3	3	NHLRC2	1.16901	0.291366
ENSECAP00000012989	1	1	PKP1	0.772236	0.291387
ENSECAP00000022765;ENSECAP00000009735	3	3	DIAPH2	0.677607	0.291407
ENSECAP00000001508	29	29	SLC4A1	3.96734	0.291525
ENSECAP00000016895	3	3	TOLLIP	0.338111	0.291596
ENSECAP00000005055	7	1	SEPTIN11	0.0791936	0.291909
ENSECAP00000010262	2	2	COX7A2	0.709419	0.29359
ENSECAP00000016987	3	2	ISG20	1.89516	0.294079
ENSECAP00000010473	14	13	VDAC1	1.26324	0.294244
ENSECAP00000021214	16	14	NUMA1	0.739422	0.294391
ENSECAP00000000396	7	5	STXBP5	0.655304	0.294644
ENSECAP00000009456	11	10	PRDX2	2.11793	0.294933
ENSECAP00000002425	1	1	RPL19	2.79484	0.295018
ENSECAP00000010665	1	1	VTI1A	5.32019	0.295769
ENSECAP00000013734	1	1	CPSF6	0.149128	0.296746
ENSECAP00000018530	1	1	NEK2	0.765306	0.297028
ENSECAP00000006855	2	1	VAPA	0.487214	0.297764
ENSECAP00000018862	4	4	ACIN1	0.698563	0.298432
ENSECAP00000014996	7	4	PITPNA	0.601877	0.2992
ENSECAP00000021891	4	4	RCC2	0.771556	0.299259
ENSECAP00000006409	6	6	UPP1	1.50336	0.299323
ENSECAP00000004055;ENSECAP00000011485	4	3	CASP8	0.656758	0.299879
ENSECAP00000011754	5	3	SF3B3	1.37948	0.301086
ENSECAP00000011047	5	5	PTGES3	0.805875	0.301376
ENSECAP00000019484	27	24	DNAJC13	1.55361	0.30158
ENSECAP00000010067	1	1	AFTPH	0.573734	0.302387
ENSECAP00000012708	2	1	LIPE	0.786686	0.303244
ENSECAP00000007637	7	5	HNRNPD	0.750697	0.303503
ENSECAP00000008636	7	3	CD44	1.55335	0.303685
ENSECAP00000022252	1	1	PUF60	0.916428	0.30406
ENSECAP00000008784	6	5	DYNC1LI1	0.798122	0.304202
ENSECAP00000004190	10	10	SORD	0.834867	0.30426
ENSECAP00000007717	4	3	PSMA4	0.750913	0.305044
ENSECAP00000018078	4	4	RAN	0.836386	0.305257
ENSECAP00000010718	1	1	APEH	1.88887	0.305288
ENSECAP00000015488	1	1	BRK1	0.536198	0.30529
ENSECAP00000007174	3	3	SLC25A24	1.58232	0.305542
ENSECAP00000021331	13	10	AK2	0.820642	0.305687
ENSECAP00000021740	2	1	EIF4B	0.666861	0.305784
ENSECAP00000019619	1	1	DCTN6	0.263882	0.306186
ENSECAP00000012872	39	37	G6PD	1.18863	0.306225
ENSECAP00000016060	3	2	ANTXR2	1.45589	0.306586
ENSECAP00000012457	2	2	PSMC4	0.71102	0.307234
ENSECAP00000019528	1	1	CPT2	0.325118	0.307641
ENSECAP00000010301	2	2	GNG2	1.20917	0.307869
ENSECAP00000008415	1	1	EHBP1L1	0.601981	0.307933
ENSECAP00000021855	2	2	CD58	11.1066	0.30828
ENSECAP00000020811	4	4	RASGRP2	2.25037	0.308466
ENSECAP00000022062	5	1	MYO1E	7.55167	0.30863
ENSECAP00000009394	5	1	DDX5	0.699547	0.308744
ENSECAP00000012398;ENSECAP00000012438	8	8	CAST	0.702748	0.310172
ENSECAP00000017598	2	2	MEMO1	0.349133	0.310774
ENSECAP00000003385	16	8	YWHAQ	0.817803	0.312175
ENSECAP00000012932	1	1	PHYHD1	0.568558	0.312869
ENSECAP00000012602	4	3	CR1	2.4064	0.313376
ENSECAP00000019905	1	1	FOXRED1	0.240019	0.313721
ENSECAP00000019469	3	2	PAPSS1	1.21862	0.314108
ENSECAP00000016452	5	5	MROH1	1.68249	0.314251
ENSECAP00000010066	1	1	ARHGAP15	1.43505	0.31539
ENSECAP00000007286	3	2	CHORDC1	0.416147	0.316591
ENSECAP00000020523	5	5	NADK	1.50995	0.317063
ENSECAP00000011409	13	12	C4BPA	0.791273	0.317411
ENSECAP00000016864	62	15	C3	1.43709	0.318831
ENSECAP00000003632;ENSECAP00000002478	11	7	HMGB1	0.714209	0.319119
ENSECAP00000020729	2	1	RNPS1	1.60988	0.3196
ENSECAP00000002350	6	4	ANP32A	0.703856	0.31998
ENSECAP00000009849	2	2	CCDC93	0.792876	0.320177
ENSECAP00000010141	10	10	FLOT2	1.30418	0.32034
ENSECAP00000011891	4	4	ITPA	0.469916	0.321125
ENSECAP00000016540	6	3	RAB5A	1.53102	0.321317
ENSECAP00000016020	11	7	HCK	1.26103	0.321433
ENSECAP00000017164	1	1	SSR1	0.720348	0.321855
ENSECAP00000008374;ENSECAP00000017014	14	12	H2AFY	1.2406	0.322186
ENSECAP00000001923;ENSECAP00000008053;ENSECAP00000008966	15	13	FES	1.18467	0.322827
ENSECAP00000017466	10	8	NADK2	1.31508	0.323273
ENSECAP00000012393	3	3	SERBP1	0.660111	0.323676
ENSECAP00000018749	19	17	MYO18A	0.755631	0.323979
ENSECAP00000001880	12	12	SUN2	1.64722	0.325127
ENSECAP00000016316	2	1	JAK3	1.27304	0.325204
ENSECAP00000019890	4	3	ABHD14B	0.565238	0.325405
ENSECAP00000015764	1	1	SLC23A1	4.20284	0.32562
ENSECAP00000012542	5	5	STX2	1.41104	0.326083
ENSECAP00000013071	1	1	B430306N03Rik	20.6209	0.326211
ENSECAP00000011113	4	3	GBP6	0.695588	0.32637
ENSECAP00000016615	7	5	ARPC5	0.807828	0.326551
ENSECAP00000022471	5	5	ACADVL	1.21455	0.327293
ENSECAP00000021122	11	8	FAM49B	1.31514	0.327318
ENSECAP00000021915	1	1	VKORC1	5.45606	0.327723
ENSECAP00000004036	1	1	IL1RAP	0.617111	0.327826
ENSECAP00000008028	1	1	LSM4	0.682299	0.327954
ENSECAP00000021702;ENSECAP00000012459	23	2	ITGAX	0.627609	0.327989
ENSECAP00000004267	3	2	NUP62	1.57832	0.328168
ENSECAP00000006072	1	1	DYNLL1	1.67532	0.328514
ENSECAP00000013274	4	4	HSD17B10	0.679196	0.329074
ENSECAP00000017252	17	16	SORL1	1.67419	0.329218
ENSECAP00000011411;ENSECAP00000015462;ENSECAP00000005691	6	6	STK26	0.736615	0.329599
ENSECAP00000013755	1	1	CTBP1	0.248704	0.329641
ENSECAP00000005681	1	1	SRP72	0.769981	0.329809
ENSECAP00000011207	7	7	TXN	0.739034	0.330772
ENSECAP00000014380	1	1	TAF11	0.564406	0.330896
ENSECAP00000012178	3	3	MTCH2	4.23603	0.331544
ENSECAP00000001188	6	5	HMOX1	1.25356	0.331689
ENSECAP00000014209	4	4	EEF1B2	0.745652	0.332136
ENSECAP00000009489	6	5	PACSIN2	0.704892	0.332291
ENSECAP00000011142	4	3	CES2	2.02043	0.332489
ENSECAP00000006460	1	1	GALT	0.66313	0.333403
ENSECAP00000019571	2	2	EIF3H	1.71146	0.334613
ENSECAP00000004525	12	5	YWHAG	0.732089	0.336412
ENSECAP00000011470;ENSECAP00000014140	24	23	ARHGDIB	0.776651	0.336723
ENSECAP00000012261;ENSECAP00000011670;ENSECAP00000009924;ENSECAP00000012483	18	4	TUBA4A	0.399501	0.336966
ENSECAP00000006414	3	3	ADAM10	2.09948	0.336982
ENSECAP00000018962	1	1	NDUFV1	35.8007	0.337119
ENSECAP00000000327	1	1	DLST	0.463872	0.337217
ENSECAP00000007091	2	2	COPS6	0.470435	0.33725
ENSECAP00000020297;ENSECAP00000007653	16	14	NT5C2	0.867725	0.337763
ENSECAP00000020706	5	4	SUCLG2	0.715982	0.337845
ENSECAP00000011523;ENSECAP00000010024	15	10	LYN	1.33644	0.338233
ENSECAP00000008312	6	3	PITPNB	0.551086	0.33879
ENSECAP00000016438	1	1	HN1	0.0739173	0.338826
ENSECAP00000019904	4	3	EWSR1	0.693655	0.339288
ENSECAP00000000675	3	3	DDX6	3.21643	0.339468
ENSECAP00000022716	1	1	CDCP1	1.1243	0.340479
ENSECAP00000005995	1	1	CAPRIN1	0.256186	0.340913
ENSECAP00000022198	1	1	GHDC	0.887216	0.34203
ENSECAP00000014130	4	3	IPO7	1.49562	0.342688
ENSECAP00000008401	1	1	SIK3	0.0354527	0.342865
ENSECAP00000013838	2	2	CUTA	0.615404	0.343231
ENSECAP00000006390;ENSECAP00000015798	3	2	SLC28A1	1.97733	0.343591
ENSECAP00000022820;ENSECAP00000007950;ENSECAP00000007964;ENSECAP00000005219;ENSECAP00000021265	29	28	DOCK2	1.40055	0.343976
ENSECAP00000022584;ENSECAP00000014206	18	17	ARPC1B	0.857999	0.343987
ENSECAP00000010508	6	6	SRRT	0.820854	0.344228
ENSECAP00000009321	2	1	SUCLA2	0.679762	0.344932
ENSECAP00000012953	4	4	SLC25A3	1.6142	0.345679
ENSECAP00000001324	2	2	IFI35	0.619376	0.346191
ENSECAP00000007652	10	10	S100A12	0.416339	0.347207
ENSECAP00000005766	2	1	REEP5	0.570226	0.347236
ENSECAP00000014327;ENSECAP00000018956	8	7	LRRFIP1	0.599728	0.347664
ENSECAP00000010822	1	1	A2M	0.649789	0.347949
ENSECAP00000015747	2	1	C10orf54	8.58765	0.348117
ENSECAP00000008680	8	8	TCIRG1	1.5566	0.348303
ENSECAP00000014850	1	1	MS4A4A	5.19055	0.348343
ENSECAP00000011139	1	1	KLF12	2.59972	0.348365
ENSECAP00000006173	12	12	DDX39B	1.35498	0.348497
ENSECAP00000016384	1	1	UBASH3B	0.538077	0.348658
ENSECAP00000022175	5	4	PTPN11	0.724719	0.348929
ENSECAP00000007249	2	2	OSBP	2.70663	0.349165
ENSECAP00000022232	5	3	LUC7L2	0.289961	0.351519
ENSECAP00000000323	3	3	STK17B	0.711005	0.351841
ENSECAP00000009567	4	4	C1QBP	0.756274	0.352375
ENSECAP00000002944	11	11	IFIT5	5.13821	0.352778
ENSECAP00000011059	1	1	NAPG	0.296534	0.353324
ENSECAP00000017243	1	1	GLO1	0.247323	0.353666
ENSECAP00000006781	2	1	EIF3J	0.380213	0.353809
ENSECAP00000006302	1	1	CMAS	0.307466	0.354366
ENSECAP00000010646	16	13	MX1	13.4021	0.355638
ENSECAP00000013833	2	1	SHMT1	0.563994	0.355661
ENSECAP00000019574	2	1	SMARCD1	3.29488	0.355978
ENSECAP00000009617	2	2	ATPIF1	0.603431	0.356129
ENSECAP00000009370	14	12	LDHB	0.853507	0.356231
ENSECAP00000000534	4	3	VDAC3	5.47884	0.356479
ENSECAP00000019006	1	1	ZFYVE20	0.825291	0.356778
ENSECAP00000014553	1	1	PDLIM5	0.288583	0.356798
ENSECAP00000019129	12	8	CAPZA2	0.831036	0.356917
ENSECAP00000021921	1	1	PDAP1	0.610926	0.357022
ENSECAP00000017093	2	2	VCAN	0.520487	0.357692
ENSECAP00000006246;ENSECAP00000007531	9	5	ARF3	1.291	0.358508
ENSECAP00000007035	1	1	XPO6	0.23292	0.358591
ENSECAP00000009120	7	6	GLS	0.359646	0.358782
ENSECAP00000005743	4	2	PIK3CD	0.723163	0.359321
ENSECAP00000011124	4	4	CTSH	0.511807	0.360383
ENSECAP00000020116	1	1	SMARCE1	2.43465	0.36039
ENSECAP00000007749	3	3	NUP210	2.42408	0.360501
ENSECAP00000008197	1	1	ERI2	1.64638	0.360938
ENSECAP00000000530;ENSECAP00000000170	16	10	GNAI2	1.23698	0.361026
ENSECAP00000013371	7	6	ATP6V0D1	1.30056	0.362476
ENSECAP00000016990	7	5	CPNE2	1.41646	0.362575
ENSECAP00000002280	28	27	PLCG2	1.2638	0.363385
ENSECAP00000011566	1	1	FAS	1.78995	0.363654
ENSECAP00000020403;ENSECAP00000010488	15	13	MAN2B1	0.382419	0.363907
ENSECAP00000005760	8	5	AP2A1	0.672162	0.363982
ENSECAP00000006430	3	3	DYNLRB1	0.687873	0.364357
ENSECAP00000004811	3	3	PHKA2	1.78786	0.366033
ENSECAP00000006859;ENSECAP00000001933;ENSECAP00000008266	10	8	PRDX1	0.784116	0.366299
ENSECAP00000020771	1	1	DHCR7	4.94779	0.366432
ENSECAP00000019364	2	2	GSS	0.223177	0.367375
ENSECAP00000002794	1	1	IPCEF1	1.06138	0.367387
ENSECAP00000021307	2	2	PEPD	0.293245	0.368079
ENSECAP00000020217;ENSECAP00000010624	7	4	PCBP2	0.745746	0.368473
ENSECAP00000014271;ENSECAP00000021922	10	9	ASAP1	0.836455	0.369988
ENSECAP00000016733	1	1	COPS7B	0.513935	0.370502
ENSECAP00000012524	1	1	COMMD4	0.623056	0.370736
ENSECAP00000015338	2	2	SMS	1.36982	0.370899
ENSECAP00000000109	1	1	UBA2	0.752576	0.371043
ENSECAP00000013130	6	6	COPS4	0.831452	0.371258
ENSECAP00000015165	23	22	FLII	0.767679	0.371721
ENSECAP00000004949;ENSECAP00000017870;ENSECAP00000005858;ENSECAP00000020589	44	37	ENO1	0.818375	0.374054
ENSECAP00000019665;ENSECAP00000003459;ENSECAP00000002648	30	25	GAPDH	0.799005	0.374285
ENSECAP00000015268	1	1	ZNF207	0.643479	0.374505
ENSECAP00000007655	1	1	SSH3	0.398712	0.375283
ENSECAP00000014905	6	6	SNTB1	13.4388	0.375497
ENSECAP00000015233	1	1	ILVBL	4.03158	0.377267
ENSECAP00000015065	1	1	Selenoh	2.37391	0.377577
ENSECAP00000008799	4	3	PAFAH1B3	0.709456	0.378722
ENSECAP00000003995	1	1	TRMT112	2.17349	0.378953
ENSECAP00000020499;ENSECAP00000020484;ENSECAP00000005101;ENSECAP00000009524	21	18	FMNL1	1.12012	0.379329
ENSECAP00000005425	1	1	SEMA3E	3.86159	0.3794
ENSECAP00000002793	3	2	PDHA1	0.66679	0.379426
ENSECAP00000012093;ENSECAP00000006833;ENSECAP00000010523	2	1	DIPK1A	0.693511	0.379766
ENSECAP00000008698	1	1	NDUFAB1	0.701544	0.379999
ENSECAP00000008652	1	1	LST1	3.12795	0.380176
ENSECAP00000010465	3	3	HDHD2	3.16879	0.380322
ENSECAP00000019190	1	1	AGTRAP	1.48006	0.381162
ENSECAP00000005551	11	10	IDH2	0.807883	0.381818
ENSECAP00000008074	10	6	HMGB2	0.774659	0.381962
ENSECAP00000015851	3	3	NPC2	0.509407	0.382156
ENSECAP00000006268	7	7	SH3BP1	0.905443	0.382768
ENSECAP00000018395	31	28	EEF2	0.860125	0.382779
ENSECAP00000018932	8	7	UQCRC2	0.692714	0.38286
ENSECAP00000006122	1	1	DDX19A	0.655699	0.384297
ENSECAP00000007455;ENSECAP00000002646	2	1	IGHG4	0.627872	0.385045
ENSECAP00000021653	5	5	DARS	1.31936	0.385104
ENSECAP00000012711;ENSECAP00000003358	4	1	IGL	1.46242	0.385141
ENSECAP00000007015	3	2	GALNS	0.591437	0.385221
ENSECAP00000018973	4	4	C20orf27	0.692426	0.385784
ENSECAP00000019150;ENSECAP00000008100;ENSECAP00000016537	20	20	HSPA4	1.12412	0.386441
ENSECAP00000012722	2	1	ATP10A	0.593598	0.387427
ENSECAP00000018306	2	2	CCAR2	0.66738	0.387733
ENSECAP00000014535	38	32	HK3	1.34543	0.388111
ENSECAP00000007555	8	7	PRTN3	1.26143	0.388362
ENSECAP00000008801	2	1	TBCD	0.467733	0.388658
ENSECAP00000005139	2	2	CHMP3	0.699476	0.388739
ENSECAP00000017866	4	3	PSMD7	1.35188	0.388746
ENSECAP00000006446;ENSECAP00000019897	11	11	CALM2	0.795324	0.389237
ENSECAP00000022515	23	21	AOX4	0.80573	0.389265
ENSECAP00000021165	1	1	KPNA4	0.476784	0.389999
ENSECAP00000014203	1	1	GOLPH3L	0.765264	0.391232
ENSECAP00000015399	4	4	LAMP1	1.22317	0.391822
ENSECAP00000008883	1	1	AGPAT2	0.430052	0.392673
ENSECAP00000002687;ENSECAP00000007597	3	2	VPS26A	1.61821	0.392988
ENSECAP00000013122	1	1	CXorf58	1.05969	0.393198
ENSECAP00000003876	6	4	ADRBK1	0.857292	0.39344
ENSECAP00000015619	4	4	PDCD10	1.54369	0.393816
ENSECAP00000004353	6	1	HIST3H3	1.44764	0.394072
ENSECAP00000005859	1	1	LSM3	0.68215	0.394545
ENSECAP00000018884	4	3	RTN3	1.23523	0.394981
ENSECAP00000006755;ENSECAP00000005668	25	25	NCF2	0.815046	0.395015
ENSECAP00000011385	3	3	LAMTOR3	1.34326	0.395387
ENSECAP00000007417	1	1	SH3GLB1	0.0368625	0.396251
ENSECAP00000002547	3	3	RPL12	0.690441	0.39644
ENSECAP00000007179;ENSECAP00000014139	25	16	GDI2	0.895606	0.396981
ENSECAP00000012049	1	1	CERCAM	19.4464	0.397521
ENSECAP00000021481	4	3	RRM1	0.696587	0.397552
ENSECAP00000006647	1	1	MAPKAPK3	1.48939	0.398589
ENSECAP00000015538	22	19	APPL1	0.797154	0.398963
ENSECAP00000017148	4	4	EIF2S2	0.642842	0.39897
ENSECAP00000009294	1	1	TACC3	1.40475	0.399057
ENSECAP00000009264	4	2	HLA-G	2.35695	0.40014
ENSECAP00000019339	7	4	PTBP3	6.03012	0.40087
ENSECAP00000011045	4	4	DAGLB	1.77598	0.40128
ENSECAP00000012137	7	6	ADD3	1.27252	0.40261
ENSECAP00000016024	4	4	VPS36	0.77505	0.40287
ENSECAP00000019787	2	1	APOBEC3G	3.06911	0.403176
ENSECAP00000007675	1	1	NEK8	0.83474	0.403268
ENSECAP00000014914	11	9	STXBP2	0.842679	0.405069
ENSECAP00000007329	7	7	SNAP23	1.13302	0.405289
ENSECAP00000018321	2	1	PPP1R21	1.72395	0.405735
ENSECAP00000009696	3	3	FAM65B	1.67056	0.406194
ENSECAP00000020701	1	1	PPP4R1	0.520116	0.406604
ENSECAP00000009883	7	7	PSMA5	0.824177	0.406893
ENSECAP00000018064	13	12	LGALS9	1.33301	0.407966
ENSECAP00000007634	2	2	YOD1	1.11882	0.40823
ENSECAP00000015878	22	22	SELENBP1	0.799564	0.408558
ENSECAP00000008285	7	7	SASH3	0.817354	0.409158
ENSECAP00000020731	3	3	SNRPD3	0.536136	0.409198
ENSECAP00000017433	21	19	ANXA11	0.858463	0.409453
ENSECAP00000018476	18	17	LCN2	0.820236	0.409707
ENSECAP00000017197	1	1	REEP3	1.52909	0.410099
ENSECAP00000009822	1	1	MANF	0.7593	0.410961
ENSECAP00000006740	1	1	C16orf62	1.97665	0.411015
ENSECAP00000012593	4	2	FAM49A	1.77817	0.411383
ENSECAP00000017310	2	2	COMMD9	0.820852	0.412141
ENSECAP00000011630	6	5	KARS	1.30475	0.41242
ENSECAP00000007649	5	4	APOA1	0.78164	0.413607
ENSECAP00000007406	1	1	CASS4	3.41989	0.413806
ENSECAP00000020928	16	16	PRAM1	0.673373	0.415942
ENSECAP00000013309	2	1	KMO	0.0874631	0.416354
ENSECAP00000012618	21	18	PLBD1	1.4603	0.417297
ENSECAP00000014735;ENSECAP00000014756	72	66	PLEC	0.861036	0.417687
ENSECAP00000010935	1	1	PSIP1	2.11212	0.418496
ENSECAP00000007961	1	1	NDUFV2	0.415149	0.418635
ENSECAP00000001363;ENSECAP00000011196	5	5	TOP1	0.781623	0.419813
ENSECAP00000011005;ENSECAP00000001813	2	2	RPSA	0.772248	0.419838
ENSECAP00000010315	41	36	PYGL	1.20511	0.420109
ENSECAP00000010115	4	2	HBE1	2.69435	0.420324
ENSECAP00000019260	1	1	VPS33A	0.625028	0.420558
ENSECAP00000013972;ENSECAP00000012931	4	4	SERPINE2	1.49408	0.42102
ENSECAP00000011372	4	3	ACTL6A	0.483913	0.421139
ENSECAP00000017687	24	2	TUBB	0.834781	0.422303
ENSECAP00000019381	1	1	C14orf80	0.743273	0.422521
ENSECAP00000007635	1	1	SLC15A4	infinity	0.42265
ENSECAP00000007968	2	2	ITPRIP	infinity	0.42265
ENSECAP00000018161	1	1	H2-Q5	infinity	0.42265
ENSECAP00000019065	2	1	EIF3G	infinity	0.42265
ENSECAP00000021544	2	1	SF3A1	infinity	0.42265
ENSECAP00000021778	1	1	BANF1	infinity	0.42265
ENSECAP00000006117	1	1	EXOSC2	0	0.42265
ENSECAP00000014924	1	1	ACSL4	0	0.42265
ENSECAP00000021390	3	1	SRSF6	infinity	0.42265
ENSECAP00000000969	1	1	SEC23IP	0	0.42265
ENSECAP00000012810	1	1	ZSCAN4	0	0.42265
ENSECAP00000000924	5	5	ISG15	8.3828	0.422731
ENSECAP00000007870	17	16	SYK	0.839748	0.422938
ENSECAP00000008620	8	8	MGAM	1.22476	0.423912
ENSECAP00000011178	1	1	BLOC1S2	0.614889	0.423927
ENSECAP00000019551	20	16	YWHAZ	0.857163	0.424399
ENSECAP00000022526	11	9	XPO1	1.18815	0.425021
ENSECAP00000001730	1	1	RPS12	0.340626	0.425532
ENSECAP00000014412	4	4	CCAR1	0.767587	0.427221
ENSECAP00000003662	2	1	IKBKB	0.70887	0.427518
ENSECAP00000002215	1	1	RPS4X	3.19589	0.427597
ENSECAP00000022844	2	1	EIF3E	0.83451	0.428504
ENSECAP00000022284	3	2	SF3B4	0.731966	0.428921
ENSECAP00000018546	30	29	IGF2R	1.29807	0.429175
ENSECAP00000019218	3	3	LAMTOR5	0.738736	0.429205
ENSECAP00000009565	7	5	CHI3L1	1.417	0.429505
ENSECAP00000010053	3	3	ALDH4A1	1.2847	0.431196
ENSECAP00000017364	5	5	NT5DC1	0.885549	0.431307
ENSECAP00000014718	6	5	RUVBL2	0.826977	0.43144
ENSECAP00000007418	31	28	LTA4H	0.843381	0.431736
ENSECAP00000008852	3	2	PPID	0.728912	0.431959
ENSECAP00000011170;ENSECAP00000011212	22	19	CORO7	0.871031	0.432028
ENSECAP00000019548	4	4	RBM8A	0.79968	0.432122
ENSECAP00000018837	1	1	FADD	0.388707	0.432659
ENSECAP00000009780	1	1	GID8	0.835609	0.432864
ENSECAP00000010505	2	2	C14orf166	1.09851	0.433831
ENSECAP00000018089	5	3	SEC13	0.4197	0.434635
ENSECAP00000006706	11	9	HAL	0.853342	0.435006
ENSECAP00000021433	1	1	EXOC1	0.786603	0.435066
ENSECAP00000002219	6	4	SDHA	0.852932	0.436201
ENSECAP00000011136;ENSECAP00000011334	13	7	ATP2A3	1.21631	0.436594
ENSECAP00000015870	2	2	IAH1	0.837157	0.43774
ENSECAP00000022988;ENSECAP00000020395	23	21	CAPN1	1.35573	0.438156
ENSECAP00000022415	10	9	CRP	0.440336	0.438389
ENSECAP00000000541	1	1	ARID1B	0.162896	0.438512
ENSECAP00000001554	3	2	MOGS	27.171	0.438867
ENSECAP00000012151	8	6	ACAP1	0.827393	0.438945
ENSECAP00000013016	1	1	NLRP3	0.778354	0.438973
ENSECAP00000004168;ENSECAP00000019974	3	1	PTP4A2	0.0286971	0.440086
ENSECAP00000012048	1	1	SCAMP3	2.25226	0.440304
ENSECAP00000012958	11	9	NCF1	1.37826	0.44038
ENSECAP00000001117	4	1	histone H2A type 1	0.749832	0.440989
ENSECAP00000016941	1	1	CARD9	2.89453	0.441539
ENSECAP00000006272;ENSECAP00000019873	4	4	PIP4K2A	0.793985	0.441963
ENSECAP00000008127;ENSECAP00000022952	3	3	CEACAM1	1.19444	0.442213
ENSECAP00000003720	1	1	DNASE1L1	4.76901	0.443449
ENSECAP00000009749	4	3	WASHC2A	1.48329	0.443584
ENSECAP00000021193	1	1	TMEM222	4.9612	0.444332
ENSECAP00000020522;ENSECAP00000007502	9	8	STIM1	1.50439	0.444717
ENSECAP00000001101	4	4	PSMB3	0.833924	0.446205
ENSECAP00000019588	2	2	RAD23B	0.780208	0.446402
ENSECAP00000017353;ENSECAP00000020791	7	5	AP1M1	1.26174	0.446656
ENSECAP00000010602	1	1	BRAT1	2.24226	0.447338
ENSECAP00000016219	3	3	LAMP2	1.36492	0.447795
ENSECAP00000017624	13	4	GSTP3	0.724245	0.448016
ENSECAP00000017842	11	10	HNRNPU	2.93592	0.449363
ENSECAP00000002213	1	1	UBQLN3	0.616373	0.449955
ENSECAP00000019205	27	25	ATP6V1A	0.881493	0.450454
ENSECAP00000007671	2	2	PARP4	1.51541	0.452325
ENSECAP00000009515	1	1	GNG7	1.76582	0.452626
ENSECAP00000008072	2	1	RHEB	0.702514	0.452657
ENSECAP00000013080	4	3	RPL6	1.41101	0.45266
ENSECAP00000005812	20	19	ORM2	0.822795	0.453526
ENSECAP00000012789	1	1	AGFG1	0.785391	0.454325
ENSECAP00000004326	3	3	ITGA6	0.341241	0.455582
ENSECAP00000014488	3	3	GLG1	1.72605	0.456423
ENSECAP00000000493;ENSECAP00000004611	2	1	AKR7A2	0.733625	0.4573
ENSECAP00000021452	1	1	TM9SF2	1.9227	0.458065
ENSECAP00000008516	1	1	OSBPL2	0.90513	0.458332
ENSECAP00000013024	51	45	ANK1	4.11692	0.459034
ENSECAP00000017815	1	1	ARSA	1.59694	0.459116
ENSECAP00000005667	2	2	TMEM164	6.48041	0.459563
ENSECAP00000014627	1	1	CD101	1.75859	0.460457
ENSECAP00000021389	1	1	RUFY1	2.44429	0.460906
ENSECAP00000010805	1	1	ACACA	0.639518	0.461124
ENSECAP00000000415	7	7	AKR1A1	0.812817	0.461309
ENSECAP00000011700	6	4	AIF1	0.869383	0.4618
ENSECAP00000017994;ENSECAP00000017987	72	47	ACTN1	0.888592	0.461891
ENSECAP00000015994	7	6	TPT1	0.828173	0.461949
ENSECAP00000011206	4	4	ECHDC2	1.56832	0.462007
ENSECAP00000012597	1	1	HARS2	0.819534	0.462797
ENSECAP00000011563	3	3	ERO1L	1.95328	0.463737
ENSECAP00000014039;ENSECAP00000011591	4	4	HDAC1	0.880333	0.463743
ENSECAP00000022911;ENSECAP00000018604;ENSECAP00000016331	7	6	DOCK11	2.2298	0.464449
ENSECAP00000007241	3	3	RPS2	0.787259	0.46494
ENSECAP00000015944	6	5	GPX1	1.13758	0.465431
ENSECAP00000001283	7	3	H3F3A	1.20613	0.466884
ENSECAP00000009463	1	1	RPL17	30.3338	0.466913
ENSECAP00000001947	2	1	CNP	1.07038	0.466979
ENSECAP00000006243	2	2	ARHGEF1	0.812937	0.468
ENSECAP00000010796	6	6	CDC37	0.36518	0.468263
ENSECAP00000009133	2	1	FKBP5	2.0978	0.468652
ENSECAP00000017783	1	1	RALGAPA2	1.42873	0.468836
ENSECAP00000010593	14	14	HNRNPL	0.826742	0.469416
ENSECAP00000018969	2	1	DHRS1	1.12889	0.4696
ENSECAP00000004957	16	11	IQGAP2	1.25261	0.469721
ENSECAP00000009761;ENSECAP00000009796	7	7	UBE2V1	0.832352	0.469813
ENSECAP00000020957	1	1	C21orf33	0.790891	0.469957
ENSECAP00000008056;ENSECAP00000009891	18	16	HBB	1.96474	0.471161
ENSECAP00000015569	3	3	METTL9	0.924035	0.471175
ENSECAP00000016655	1	1	PGM2L1	2.14957	0.47168
ENSECAP00000010539	17	16	ANXA4	1.3734	0.472681
ENSECAP00000006247	4	4	HADHB	0.824299	0.473233
ENSECAP00000016175	105	1	SYNE1	0.355404	0.473841
ENSECAP00000013027	3	3	TOMM70A	0.733081	0.473999
ENSECAP00000020014	1	1	MEA1	0.691965	0.475486
ENSECAP00000014747	5	3	PSMB5	2.47638	0.475867
ENSECAP00000004555	2	2	SPCS1	1.4885	0.477179
ENSECAP00000000126	22	1	ACTA1	0.801674	0.477784
ENSECAP00000010949	5	4	ETF1	0.798313	0.478194
ENSECAP00000015007	4	3	RCC1	0.987122	0.478392
ENSECAP00000020285	2	1	HCFC1	0.20084	0.479124
ENSECAP00000012968	5	5	SDCBP	0.803304	0.479659
ENSECAP00000011215	2	2	RHCE	3.51199	0.480247
ENSECAP00000006909	5	4	VPS29	0.800143	0.480491
ENSECAP00000011286	2	1	ATP4A	1.31169	0.480973
ENSECAP00000009904	1	1	SDHB	1.13506	0.481752
ENSECAP00000014263	1	1	REPS1	3.44487	0.481822
ENSECAP00000022590	2	1	RPL22	1.36181	0.48245
ENSECAP00000010788	1	1	NPLOC4	0.874969	0.484027
ENSECAP00000018106;ENSECAP00000007319	3	3	UBE2D3	0.83085	0.48424
ENSECAP00000017313	3	3	SNRPA1	1.80846	0.484428
ENSECAP00000010449	3	3	AMDHD2	3.99441	0.484808
ENSECAP00000004542	1	1	REXO2	1.3185	0.485026
ENSECAP00000014026	2	2	SPCS3	1.36368	0.485547
ENSECAP00000009921	2	2	C1H15orf48	0.852708	0.486383
ENSECAP00000004458	1	1	OR12D2	1.43292	0.487343
ENSECAP00000020667	1	1	SSR4	3.62325	0.488029
ENSECAP00000012768;ENSECAP00000006041	5	5	ACAP2	0.808126	0.489629
ENSECAP00000006868	7	5	ANP32E	0.824383	0.489915
ENSECAP00000021802	5	5	ESD	0.833566	0.490214
ENSECAP00000020656	18	16	VNN2	0.83549	0.490449
ENSECAP00000012587;ENSECAP00000005226	5	5	AKR1B1	1.20125	0.491242
ENSECAP00000015890	3	3	GNAQ	0.779276	0.491263
ENSECAP00000005308	3	3	SPCS2	1.9118	0.492095
ENSECAP00000012557;ENSECAP00000012673;ENSECAP00000004442	10	9	MAPK14	1.26396	0.492374
ENSECAP00000007505	4	1	ATP2B1	8.1346	0.49324
ENSECAP00000021406	3	3	MMP8	0.222083	0.493287
ENSECAP00000008293	4	4	RP2	0.922391	0.493836
ENSECAP00000022862	3	3	IRAK3	2.30091	0.49436
ENSECAP00000006541	1	1	BTN3A3	23.7215	0.494545
ENSECAP00000002244	7	7	PSMD13	1.25433	0.494675
ENSECAP00000019732	1	1	LZIC	5.07186	0.495028
ENSECAP00000005289	1	1	TTC21A	1.26277	0.495304
ENSECAP00000016144	11	9	EML2	0.855214	0.495417
ENSECAP00000013300	15	14	COPB2	1.15119	0.496218
ENSECAP00000021880	4	3	GNAS1	1.36707	0.49652
ENSECAP00000002189	1	1	FOXD4L1	0.786139	0.497537
ENSECAP00000003274	1	1	DNAJC5	1.4589	0.498647
ENSECAP00000010000	10	10	ARHGAP9	0.83184	0.49866
ENSECAP00000005940	4	4	CSNK2A1	1.20534	0.499149
ENSECAP00000017340	1	1	TUFM	0.827956	0.499229
ENSECAP00000019350	1	1	DNPEP	0.349892	0.499884
ENSECAP00000021140	6	4	ALDH16A1	1.25533	0.500171
ENSECAP00000016508;ENSECAP00000016839	3	3	SAFB	0.781906	0.500544
ENSECAP00000009472	12	10	HK1	1.12488	0.500696
ENSECAP00000006185	10	8	ADK	1.19859	0.501459
ENSECAP00000015799	2	1	ADGRE2	0.0337685	0.501955
ENSECAP00000016292	1	1	LSM2	0.475487	0.503597
ENSECAP00000004243	2	2	VTA1	0.811578	0.504442
ENSECAP00000007995	3	3	IRF5	0.799801	0.504567
ENSECAP00000020211	7	7	ATG7	0.79142	0.506158
ENSECAP00000008816	4	4	CCDC22	0.757661	0.507617
ENSECAP00000016635	4	4	CD47	1.36549	0.507772
ENSECAP00000019701	2	2	DNM1L	0.835639	0.508212
ENSECAP00000017568	4	2	PLAA	2.0596	0.508709
ENSECAP00000010386	4	4	DGKA	0.782798	0.508734
ENSECAP00000013268	4	2	CASP6	1.37396	0.510069
ENSECAP00000009155	4	4	ADSS	1.22511	0.510351
ENSECAP00000000669;ENSECAP00000022115	5	5	HLA-B	0.825402	0.510719
ENSECAP00000008815	2	2	HMHA1	1.66385	0.512324
ENSECAP00000006434	1	1	COMMD10	0.848655	0.512716
ENSECAP00000014325;ENSECAP00000021596	4	4	ARFGEF1	0.844966	0.512743
ENSECAP00000006230	1	1	TPP1	0.518443	0.513153
ENSECAP00000006934	4	4	ILF2	0.84091	0.51503
ENSECAP00000018692	1	1	UBE2Z	0.670434	0.515773
ENSECAP00000020984	4	4	TNFAIP8	1.16692	0.51578
ENSECAP00000006295	9	9	DYNC1I2	0.795447	0.516269
ENSECAP00000022998	3	3	UBR4	1.80541	0.516424
ENSECAP00000008897	7	6	MDH1	0.650617	0.516937
ENSECAP00000017133	1	1	CNPY2	0.692555	0.517683
ENSECAP00000012016	4	4	SNX18	0.865377	0.518386
ENSECAP00000009632	1	1	C5orf22	0.854615	0.520442
ENSECAP00000018245	2	2	MAGOH	1.20896	0.521004
ENSECAP00000010719	11	11	ARPC4	1.22285	0.52103
ENSECAP00000013488	7	1	CD177	0.766058	0.521779
ENSECAP00000007854	9	9	CA1	2.48681	0.521867
ENSECAP00000018043	1	1	ADPGK	0.371077	0.522802
ENSECAP00000006294	3	3	TMOD1	5.62305	0.52365
ENSECAP00000010785	2	2	CHMP6	3.01556	0.524129
ENSECAP00000017220	10	10	GARS	0.864385	0.524447
ENSECAP00000015790	5	4	SEC31A	0.84574	0.52495
ENSECAP00000012215	8	8	GSR	0.789257	0.525498
ENSECAP00000019601	12	6	IDO1	1.24673	0.526555
ENSECAP00000019047;ENSECAP00000020847	4	3	STAG2	1.34365	0.527069
ENSECAP00000008821	1	1	MGAM2	0.82398	0.52867
ENSECAP00000015187	2	2	RAB18	1.4341	0.528727
ENSECAP00000015480	5	5	IMPA2	3.04036	0.529484
ENSECAP00000012672	1	1	GUSB	5.38156	0.529508
ENSECAP00000020333	21	16	ANXA6	1.5963	0.532224
ENSECAP00000018851	3	3	TARS	0.898261	0.532809
ENSECAP00000006792	1	1	AKAP10	0.678763	0.534546
ENSECAP00000005876	7	7	PRPF19	0.808546	0.536135
ENSECAP00000017664	2	2	SELL	1.16028	0.536269
ENSECAP00000014920	12	1	PPP1CC	0.759569	0.537156
ENSECAP00000000482	11	9	SFPQ	0.870524	0.537265
ENSECAP00000011457	11	11	FNBP1	0.859606	0.537684
ENSECAP00000017065	7	5	SNX1	0.880068	0.538224
ENSECAP00000010379	1	1	CASP14	0.825485	0.538278
ENSECAP00000022118	1	1	COPZ1	0.869647	0.538294
ENSECAP00000020242;ENSECAP00000022238	6	4	RAB6A	0.833408	0.53875
ENSECAP00000015337	3	3	SF3A3	0.885661	0.539158
ENSECAP00000018285	1	1	LMAN1	1.2103	0.539317
ENSECAP00000005811	2	1	HIST2H2AB	0.848219	0.539323
ENSECAP00000014421	7	6	CS	1.28517	0.540811
ENSECAP00000011482	1	1	HDLBP	5.19186	0.54085
ENSECAP00000007012	2	1	SNX4	0.733536	0.540939
ENSECAP00000009662	3	3	UROD	1.16305	0.542313
ENSECAP00000009961	9	9	ATG3	0.874129	0.542363
ENSECAP00000000922	1	1	OR8S1	0.812823	0.542657
ENSECAP00000021451	1	1	NAA38	0.845539	0.542721
ENSECAP00000014183	5	4	HBZ	2.11277	0.542763
ENSECAP00000007591	1	1	PRPF40A	1.20134	0.543667
ENSECAP00000009437;ENSECAP00000009448	4	3	FAM160B1	0.756969	0.544049
ENSECAP00000008282	1	1	ZBTB45	18.5905	0.544759
ENSECAP00000014197	1	1	FASLG	0.584399	0.545073
ENSECAP00000019164	1	1	GOSR1	0.879706	0.54541
ENSECAP00000014302	6	6	CA2	1.6925	0.545959
ENSECAP00000013718	4	2	TTN	0.896462	0.546626
ENSECAP00000003989	10	10	QDPR	2.16664	0.547236
ENSECAP00000018808	2	2	PRPF8	0.769405	0.548153
ENSECAP00000007173	5	5	EIF3C	1.21328	0.548269
ENSECAP00000013866	9	9	DPP3	1.24172	0.551317
ENSECAP00000012450	1	1	OAS2	2.10821	0.551899
ENSECAP00000009909	1	1	PNN	13.0708	0.553478
ENSECAP00000007767	5	3	MAP2K2	1.25096	0.553739
ENSECAP00000010883	1	1	TNPO3	0.803177	0.554375
ENSECAP00000015886	1	1	PHKB	2.32689	0.554476
ENSECAP00000013596	4	3	TSN	0.897257	0.554756
ENSECAP00000004928	1	1	CKAP4	1.44135	0.554827
ENSECAP00000012223	25	23	GBE1	1.19925	0.555185
ENSECAP00000015714;ENSECAP00000006804	5	5	ILF3	0.887545	0.555537
ENSECAP00000013335	2	2	SNCA	0.845065	0.555824
ENSECAP00000017908	1	1	TBCC	0.646276	0.556639
ENSECAP00000011828	3	3	SEC22B	0.844277	0.557247
ENSECAP00000016558	1	1	ARID3C	1.29239	0.557701
ENSECAP00000010128	5	1	RPS6KA3	0.811583	0.557925
ENSECAP00000022805;ENSECAP00000009075;ENSECAP00000018551	113	8	SYNE1	0.877567	0.559584
ENSECAP00000004720	1	1	DNPH1	1.14529	0.561006
ENSECAP00000005875	2	2	USP9X	1.23869	0.561821
ENSECAP00000013754	8	8	PPP6R1	1.2535	0.562701
ENSECAP00000001625	1	1	ATP5J2	1.09409	0.563221
ENSECAP00000011313	1	1	NMT1	0.951729	0.563997
ENSECAP00000003361	1	1	SEC24A	5.86613	0.56435
ENSECAP00000021927	1	1	SMAP2	0.892555	0.564486
ENSECAP00000013223	3	3	A1BG	1.26865	0.564726
ENSECAP00000010967	27	23	ALOX5	1.16024	0.565248
ENSECAP00000017807	2	2	HADH	0.917058	0.565609
ENSECAP00000022445	5	5	PLA2G4A	0.862953	0.565746
ENSECAP00000008268	1	1	RIPK1	1.02267	0.565771
ENSECAP00000008340	1	1	CDC5L	0.459018	0.565925
ENSECAP00000016264	32	16	EZR	0.920911	0.566497
ENSECAP00000019949	6	5	COPA	1.16576	0.56753
ENSECAP00000006885	2	2	TMED10	1.26033	0.56772
ENSECAP00000004457	6	6	PHGDH	0.782826	0.569776
ENSECAP00000018953	1	1	DCUN1D1	1.40107	0.570001
ENSECAP00000014863	7	6	PRDX3	0.869303	0.571204
ENSECAP00000011595	1	1	ISY1	0.799753	0.572014
ENSECAP00000021842	1	1	PTPN7	0.368381	0.572684
ENSECAP00000008295	7	4	GMFG	0.768952	0.572826
ENSECAP00000019298	10	1	EIF4A1	0.982295	0.573594
ENSECAP00000018815	1	1	NCOA3	6.50495	0.57415
ENSECAP00000022279	4	4	LGALS9	0.264013	0.574254
ENSECAP00000010838;ENSECAP00000010775	21	19	CYFIP2	1.37086	0.5752
ENSECAP00000022824;ENSECAP00000015499;ENSECAP00000015080	4	2	CTPS2	0.833954	0.576214
ENSECAP00000010245	9	1	PPP2R1B	0.885378	0.577108
ENSECAP00000010296	2	2	TRAPPC3	0.907562	0.578634
ENSECAP00000009000	3	1	CTPS1	0.66918	0.578738
ENSECAP00000004973;ENSECAP00000010637	5	5	RAB31	1.12832	0.578983
ENSECAP00000009403	11	10	SELP	0.879555	0.579481
ENSECAP00000022950;ENSECAP00000012445;ENSECAP00000004381	8	8	IPO5	1.11072	0.580152
ENSECAP00000009239	8	6	LMNB2	0.858119	0.580462
ENSECAP00000001434	1	1	SAE1	0.853311	0.580744
ENSECAP00000011711	1	1	SNRNP70	0.898205	0.580834
ENSECAP00000016040	3	3	GRN	2.43252	0.582462
ENSECAP00000019919	1	1	BAIAP2	0.802424	0.582658
ENSECAP00000012785	8	7	PREX1	1.19129	0.58277
ENSECAP00000011553	13	11	ANXA7	0.935139	0.582839
ENSECAP00000011496	3	2	FHOD1	0.286754	0.583583
ENSECAP00000022686	22	21	HNRNPK	0.902021	0.583653
ENSECAP00000010098	3	2	PGLYRP1	1.17914	0.584841
ENSECAP00000010406	12	9	RAB7A	1.14537	0.585515
ENSECAP00000000282	1	1	MCFD2	0.634949	0.586405
ENSECAP00000015949	4	3	NAPRT1	1.1588	0.587424
ENSECAP00000005731	5	2	EEA1	1.19673	0.588437
ENSECAP00000004737;ENSECAP00000001581	3	2	GK	2.01523	0.588487
ENSECAP00000008318	3	3	WASF2	0.897939	0.589915
ENSECAP00000010300	3	3	GLB1	1.77914	0.590487
ENSECAP00000002343	6	6	UBC	1.07258	0.590768
ENSECAP00000006186	1	1	IVD	0.875089	0.590872
ENSECAP00000002594	1	1	STRN4	2.01964	0.591628
ENSECAP00000004886	7	7	ERAP1	1.18144	0.592826
ENSECAP00000014660	1	1	TRERF1	0.817432	0.593155
ENSECAP00000016105	4	3	ATP5F1	1.15587	0.593512
ENSECAP00000018822;ENSECAP00000022931	3	1	SRSF4	0.751392	0.593919
ENSECAP00000010598	2	2	EIF5	0.963844	0.594179
ENSECAP00000017262	1	1	MTMR3	1.39817	0.595074
ENSECAP00000016068	1	1	GPD1L	0.875586	0.595787
ENSECAP00000021555	1	1	CALCOCO1	1.28033	0.59618
ENSECAP00000021462	11	11	ACO2	0.909748	0.596333
ENSECAP00000009766	1	1	UBAC1	1.55632	0.596712
ENSECAP00000009171	31	31	ALB	0.908947	0.597553
ENSECAP00000022291	3	2	NOP58	1.17384	0.597656
ENSECAP00000022364	10	9	APAF1	1.31299	0.598902
ENSECAP00000010413	5	4	PPBP	0.660579	0.600245
ENSECAP00000006267	3	3	EML4	0.896538	0.600533
ENSECAP00000020646;ENSECAP00000014708	7	3	GZMB	1.7868	0.600806
ENSECAP00000002308	1	1	MARCKS	0.862473	0.601252
ENSECAP00000012220	1	1	ADRM1	0.661744	0.601667
ENSECAP00000011238	1	1	UBE2M	0.873125	0.60366
ENSECAP00000020926	3	2	SIRT2	1.27034	0.603908
ENSECAP00000004774	1	1	ARHGAP27	0.831936	0.605035
ENSECAP00000018210	3	2	HOOK3	0.890709	0.605212
ENSECAP00000015055	1	1	MAFG	0.90858	0.605425
ENSECAP00000005499;ENSECAP00000020377;ENSECAP00000012187	16	15	XDH	1.33543	0.605779
ENSECAP00000011898	2	1	VAMP7	1.6432	0.6059
ENSECAP00000014386	1	1	DDX23	0.117697	0.606196
ENSECAP00000014397	5	5	PSME1	1.11205	0.607092
ENSECAP00000007817	13	13	LPCAT2	1.10983	0.608465
ENSECAP00000003427	4	3	CBL	1.19517	0.608631
ENSECAP00000007364	2	2	CNRIP1	1.59996	0.609019
ENSECAP00000011835	1	1	PROM1	6.24293	0.610292
ENSECAP00000018424	6	6	ARSB	0.666283	0.610304
ENSECAP00000019820;ENSECAP00000011904	10	4	TPM4	1.6674	0.61155
ENSECAP00000018086	6	6	PARVG	1.23745	0.612088
ENSECAP00000017643	1	1	RTCA	2.58564	0.612207
ENSECAP00000022210	7	6	FUCA1	1.44503	0.613335
ENSECAP00000008397	1	1	HSD17B12	0.912233	0.613859
ENSECAP00000016449	3	3	WDFY1	1.245	0.614262
ENSECAP00000022179;ENSECAP00000022172	7	4	IMMT	1.10066	0.614763
ENSECAP00000016907	6	5	EFTUD2	1.42164	0.615478
ENSECAP00000016613	4	4	LILRA5	0.839027	0.615924
ENSECAP00000022533	7	5	HIST1H1C	1.15162	0.616226
ENSECAP00000004701	1	1	APIP	0.813811	0.616269
ENSECAP00000016707;ENSECAP00000012776	8	8	ARRB2	0.909232	0.617426
ENSECAP00000021698	4	4	UCHL3	0.910065	0.61764
ENSECAP00000021145;ENSECAP00000005320	3	3	RASSF2	0.874158	0.618949
ENSECAP00000017626	9	7	ATL3	1.6706	0.619784
ENSECAP00000013550	1	1	MCM8	1.00602	0.62263
ENSECAP00000011028	1	1	DCTN3	1.11708	0.622774
ENSECAP00000003740	1	1	CTSA	0.884194	0.623615
ENSECAP00000011578	1	1	AUP1	2.76589	0.624098
ENSECAP00000017645	1	1	KALRN	1.45419	0.625507
ENSECAP00000007227	20	19	ARHGAP25	0.937745	0.625959
ENSECAP00000018399;ENSECAP00000020751	3	3	OSBPL11	1.59772	0.626587
ENSECAP00000016524	10	8	TF	0.924282	0.627875
ENSECAP00000012189	1	1	STK39	1.2833	0.629146
ENSECAP00000018827	2	2	SMU1	0.893027	0.630164
ENSECAP00000008990	6	4	MAP2K1	0.94878	0.630439
ENSECAP00000008148	11	11	ARHGAP1	1.2682	0.632544
ENSECAP00000011602	4	3	GGA1	0.901714	0.632804
ENSECAP00000014243;ENSECAP00000021178	4	1	H2AFV	0.782474	0.632852
ENSECAP00000015774	1	1	IGSF6	4.15751	0.633293
ENSECAP00000013147	6	6	VDAC2	1.27645	0.633576
ENSECAP00000010678	8	8	DDB1	0.85678	0.633653
ENSECAP00000009554	3	3	CUL3	1.20983	0.63389
ENSECAP00000019004	9	8	TPR	0.895389	0.634083
ENSECAP00000016337	1	1	BROX	1.57601	0.635119
ENSECAP00000012814	3	3	RPS8	1.33923	0.636479
ENSECAP00000009367	2	2	MYO9B	0.891122	0.637717
ENSECAP00000009002	1	1	Cyp2c66	27.1756	0.637812
ENSECAP00000019682;ENSECAP00000013326	7	6	DEF6	1.11081	0.639458
ENSECAP00000017924	5	5	ASAH1	0.898851	0.640758
ENSECAP00000018076	19	10	GSTP1	0.926381	0.641476
ENSECAP00000010359;ENSECAP00000004015	4	3	EIF1	1.12012	0.64271
ENSECAP00000012322;ENSECAP00000012143	15	13	TWF2	0.937677	0.642735
ENSECAP00000012379	20	20	APMAP	1.34755	0.643341
ENSECAP00000004403	14	12	ORM2	0.831149	0.643661
ENSECAP00000019784	1	1	MTR	0.801599	0.645095
ENSECAP00000014359	16	16	STK10	0.92648	0.646049
ENSECAP00000009237	10	8	WARS	0.951734	0.646248
ENSECAP00000005765	2	2	NISCH	1.23694	0.646661
ENSECAP00000017488;ENSECAP00000000294	3	3	PMM2	0.965129	0.646718
ENSECAP00000009226	15	15	DPYD	0.931749	0.647072
ENSECAP00000007648;ENSECAP00000012086	4	3	SLC25A12	0.876279	0.650297
ENSECAP00000007463	1	1	GLYR1	2.72237	0.650354
ENSECAP00000013914	7	4	BMX	0.906894	0.651906
ENSECAP00000014272	6	2	ATP6V1E1	0.818564	0.65432
ENSECAP00000010996	3	3	FIS1	1.16005	0.654709
ENSECAP00000013937	4	3	PSMB6	0.908303	0.654798
ENSECAP00000014340;ENSECAP00000022847	7	7	TXNRD1	0.917496	0.655018
ENSECAP00000009888	5	5	HEXB	0.893653	0.655707
ENSECAP00000001827	4	4	FAH	1.10231	0.655809
ENSECAP00000000140	3	2	STX11	0.99671	0.656131
ENSECAP00000011955	1	1	VPS16	2.13259	0.656797
ENSECAP00000008853	1	1	RPS4X	1.00737	0.657693
ENSECAP00000000653	8	8	BLVRB	1.54036	0.658272
ENSECAP00000009293	14	13	ALPL	1.15446	0.658344
ENSECAP00000014200	1	1	CWF19L1	1.58829	0.659114
ENSECAP00000001619	4	3	RAB35	1.05271	0.659509
ENSECAP00000016084;ENSECAP00000008320	13	11	MYO1G	0.967587	0.659942
ENSECAP00000005929	5	5	PPP2R5A	1.18268	0.661417
ENSECAP00000009911	34	32	AGL	0.923111	0.6621
ENSECAP00000000465	1	1	SART3	1.44041	0.664391
ENSECAP00000018743	4	3	ACADM	0.952167	0.665564
ENSECAP00000004488	1	1	KIAA1033	1.08437	0.665877
ENSECAP00000014879	1	1	HMOX2	3.081	0.666707
ENSECAP00000015586	1	1	SEH1L	1.00886	0.669728
ENSECAP00000021662	2	1	RANGAP1	1.61119	0.670656
ENSECAP00000022155;ENSECAP00000006017	5	4	ADD2	1.51061	0.670798
ENSECAP00000021219	9	8	PREP	1.547	0.671105
ENSECAP00000013324	1	1	ARAP3	1.5787	0.672584
ENSECAP00000015376	1	1	ZNF142	0.934743	0.673697
ENSECAP00000023062	1	1	VPS25	1.44305	0.673788
ENSECAP00000010836	4	4	DCPS	0.744782	0.674216
ENSECAP00000014334	1	1	NAF1	1.03674	0.677129
ENSECAP00000012113;ENSECAP00000002259	4	4	SEPHS1	0.943466	0.678265
ENSECAP00000007853	11	10	STAT1	1.11174	0.678298
ENSECAP00000002869	2	1	CNGA2	0.584592	0.679234
ENSECAP00000003443	16	16	VPS35	1.12503	0.6793
ENSECAP00000016129	14	12	LAP3	0.93973	0.681358
ENSECAP00000022125	3	3	SF3B2	0.732764	0.682157
ENSECAP00000005483	9	6	DCTN1	0.957803	0.682452
ENSECAP00000016935	1	1	RASSF5	0.977843	0.682615
ENSECAP00000016220	5	4	ANXA3	0.652163	0.68276
ENSECAP00000008362	34	28	ACLY	1.12759	0.682766
ENSECAP00000015865	2	2	GTPBP1	1.58239	0.684192
ENSECAP00000013051	1	1	VARS	2.50975	0.684884
ENSECAP00000014965	1	1	BBS1	1.17359	0.685899
ENSECAP00000012998	11	7	AP2A2	0.926086	0.687343
ENSECAP00000003967	5	4	PRG3	0.965877	0.690838
ENSECAP00000018787	1	1	CSDE1	1.42057	0.69106
ENSECAP00000003574	2	2	ARF6	0.920755	0.691215
ENSECAP00000016873	5	3	HSD11B1	1.51941	0.691241
ENSECAP00000017634	3	3	SARS	1.35085	0.691437
ENSECAP00000002228	8	6	HNRNPF	0.938396	0.692614
ENSECAP00000016897	4	4	UBLCP1	1.55063	0.692688
ENSECAP00000007368;ENSECAP00000002609	2	1	IGHG4	0.758041	0.693066
ENSECAP00000020434	1	1	RAB32	2.1765	0.694562
ENSECAP00000020397	5	5	XPNPEP1	0.940388	0.696022
ENSECAP00000007479	19	10	AP2B1	0.95007	0.696068
ENSECAP00000017440	6	6	FNTA	0.915749	0.696379
ENSECAP00000013236	2	2	METAP2	0.919804	0.696883
ENSECAP00000021023	4	4	PSMB7	0.892212	0.697689
ENSECAP00000019477	7	6	ANKFY1	0.971594	0.697792
ENSECAP00000022800	2	1	SRRM1	1.03099	0.698025
ENSECAP00000021353	1	1	LAMA2	0.761982	0.69869
ENSECAP00000000273	3	3	FGL2	0.957649	0.698716
ENSECAP00000008642;ENSECAP00000002875;ENSECAP00000006376	12	5	MAPK1	1.33121	0.698761
ENSECAP00000013123	1	1	UBE2H	128.292	0.699468
ENSECAP00000007714	1	1	PTPRE	1.72897	0.699517
ENSECAP00000012452	4	4	PSMD11	1.10099	0.700381
ENSECAP00000019644	4	4	APOR	0.8713	0.700785
ENSECAP00000019171	5	5	PSMB1	1.11662	0.702202
ENSECAP00000012131	1	1	GDAP2	1.26054	0.702622
ENSECAP00000010907	9	7	SIPA1	0.951707	0.702863
ENSECAP00000003157	11	10	PTX3	0.923682	0.703098
ENSECAP00000022837;ENSECAP00000007610	3	3	RIN3	0.896267	0.703409
ENSECAP00000003640	8	3	ARF4	1.07655	0.704404
ENSECAP00000020985	1	1	AFP	1.69579	0.705064
ENSECAP00000011487	18	15	ESYT1	1.06133	0.705377
ENSECAP00000006615	15	12	F13A1	1.30359	0.705853
ENSECAP00000006569	6	6	THEMIS2	1.05778	0.706013
ENSECAP00000017334	10	10	CRLF3	0.952385	0.706584
ENSECAP00000011913	3	3	VPS45	1.28915	0.706654
ENSECAP00000000009	3	3	RPE	0.838279	0.707632
ENSECAP00000013536	1	1	CMBL	1.26856	0.708881
ENSECAP00000022044	6	5	KIAA0196	1.46816	0.709154
ENSECAP00000009021	1	1	MTDH	1.12931	0.71002
ENSECAP00000016640	9	9	RENBP	0.946517	0.710234
ENSECAP00000010263	3	1	ANP32B	0.926937	0.711033
ENSECAP00000020047	2	1	SWAP70	1.66302	0.71146
ENSECAP00000018049	12	10	ARHGDIA	0.940378	0.711789
ENSECAP00000018335;ENSECAP00000018140	6	6	TGFBI	0.959089	0.711935
ENSECAP00000019426	20	16	GYS1	1.1608	0.71267
ENSECAP00000006887	31	17	HSP90AB1	1.08671	0.713095
ENSECAP00000007199;ENSECAP00000008446	15	15	S100A8	0.953005	0.713447
ENSECAP00000013468	1	1	NUP98	1.23315	0.715224
ENSECAP00000006705	7	6	CYB5R3	1.1445	0.715313
ENSECAP00000005939	3	3	HYI	0.940098	0.715351
ENSECAP00000019516;ENSECAP00000015051	80	71	LTF	0.952434	0.716644
ENSECAP00000017362	5	2	RRAGC	1.46114	0.716743
ENSECAP00000022637	1	1	C9orf64	1.02367	0.716786
ENSECAP00000019288;ENSECAP00000019320;ENSECAP00000008077;ENSECAP00000014719	143	93	MYH9	0.965825	0.716867
ENSECAP00000014567	1	1	NES	0.905059	0.717453
ENSECAP00000021736	3	2	ATP6V1H	0.930984	0.71765
ENSECAP00000022058	10	9	Ngp	0.945255	0.717925
ENSECAP00000016634	2	2	HMGN1	1.05855	0.718125
ENSECAP00000016091	9	2	PAK1	2.29555	0.718633
ENSECAP00000013607	1	1	SAPS3	1.32932	0.720542
ENSECAP00000020920	1	1	FARSB	0.0340215	0.720729
ENSECAP00000017490	33	28	CAT	0.963727	0.721511
ENSECAP00000005371	3	1	IGHG2	0.711584	0.722125
ENSECAP00000019652	2	2	RASGRP4	1.72111	0.724028
ENSECAP00000015899	2	1	PAFAH1B2	1.21034	0.724456
ENSECAP00000011473	10	9	PSMD5	1.09043	0.724677
ENSECAP00000015248	6	5	GNA13	1.35889	0.725118
ENSECAP00000019342	8	8	SF3B1	0.961041	0.727459
ENSECAP00000022339	4	4	TMX3	1.82608	0.728529
ENSECAP00000020763	1	1	SEPX1	1.15966	0.728651
ENSECAP00000006750	1	1	MPST	3.59487	0.729841
ENSECAP00000008042	1	1	NUP205	0.339891	0.730506
ENSECAP00000014491	1	1	B3GNT2	15.7767	0.730735
ENSECAP00000013214	1	1	YIF1B	13.7071	0.731071
ENSECAP00000012782	1	1	IRAK4	0.955732	0.733654
ENSECAP00000013813	1	1	VAV2	0.715809	0.735451
ENSECAP00000013449	17	17	NBEAL2	1.14409	0.736089
ENSECAP00000001815	1	1	DLD	0.211683	0.738192
ENSECAP00000019055	2	2	BRCC3	1.02114	0.738224
ENSECAP00000011982;ENSECAP00000010901	5	5	PSMA7	0.962901	0.73858
ENSECAP00000015914	1	1	SON	15.2693	0.739433
ENSECAP00000015276	4	4	EIF2S3	0.984868	0.739469
ENSECAP00000009195	1	1	SLC47A2	1.42639	0.739879
ENSECAP00000012978	1	1	RPL18A	13.8886	0.739915
ENSECAP00000017062	5	1	KRAS	0.948335	0.740278
ENSECAP00000021085	1	1	ACOT7	0.914907	0.741851
ENSECAP00000021062	8	7	TMPO	0.92707	0.742201
ENSECAP00000005838	2	2	SNRPD2	0.974967	0.742345
ENSECAP00000020932	1	1	PRCP	5.56952	0.742887
ENSECAP00000020553	5	5	STRAP	0.91182	0.743014
ENSECAP00000016694;ENSECAP00000000958	2	1	ERH	1.35946	0.743895
ENSECAP00000010583	20	17	DOCK8	1.09693	0.747601
ENSECAP00000014911	26	25	UNC13D	0.954279	0.748494
ENSECAP00000007114	2	2	STAT6	2.01483	0.749084
ENSECAP00000014944	3	2	NARS	1.06436	0.749088
ENSECAP00000014740	2	2	BABAM1	0.949735	0.749295
ENSECAP00000020113	1	1	API5	1.35253	0.750236
ENSECAP00000017893	2	1	CD82	1.39905	0.753699
ENSECAP00000011100	1	1	TMBIM6	1.04503	0.756117
ENSECAP00000019835	7	7	APEX1	1.13065	0.756715
ENSECAP00000001340	1	1	NR2C1	1.14684	0.756857
ENSECAP00000018207	13	12	CCT2	1.18876	0.757442
ENSECAP00000012046	1	1	C9orf84	1.34493	0.757519
ENSECAP00000011609;ENSECAP00000020025	9	9	CSK	0.95508	0.757642
ENSECAP00000019175	10	8	NME2	0.960924	0.758097
ENSECAP00000014512	1	1	COMMD1	2.09012	0.759949
ENSECAP00000019309	17	15	ADSL	0.967026	0.760424
ENSECAP00000020565	2	2	IMPA1	0.841473	0.760635
ENSECAP00000006599;ENSECAP00000008747	34	32	SERPINB10	0.879324	0.761557
ENSECAP00000020574	6	3	GNPDA1	0.967484	0.762226
ENSECAP00000012134	3	3	LXN	0.844541	0.763636
ENSECAP00000005000	4	4	CRISP3	1.00452	0.765906
ENSECAP00000000414	10	9	MAP1S	0.94702	0.770076
ENSECAP00000021032;ENSECAP00000020818;ENSECAP00000011791	12	11	PRKCD	1.09943	0.773724
ENSECAP00000001198;ENSECAP00000015297;ENSECAP00000017827	4	4	CAMK2G	1.09621	0.775033
ENSECAP00000014613	38	33	UGP2	1.0652	0.775589
ENSECAP00000007757	1	1	RPS19	1.53368	0.776143
ENSECAP00000018277	1	1	HDAC7	0.0481162	0.776941
ENSECAP00000018636	1	1	CSNK2B	1.40843	0.777097
ENSECAP00000019921	5	4	TSTA3	1.2317	0.777986
ENSECAP00000010329;ENSECAP00000004093	4	4	CAMKK2	0.754999	0.778109
ENSECAP00000019865;ENSECAP00000006326	2	2	ANKRD13A	1.08843	0.778787
ENSECAP00000011384	3	2	GAPVD1	0.93295	0.779676
ENSECAP00000003577	13	12	EPRS	0.950048	0.779878
ENSECAP00000010864;ENSECAP00000012964	22	1	ACTC1	1.64311	0.779908
ENSECAP00000014283;ENSECAP00000014296	15	13	ARAP1	1.10724	0.781061
ENSECAP00000005223	2	2	FN1	1.13692	0.782184
ENSECAP00000006083	1	1	AP3M1	1.34011	0.782521
ENSECAP00000014972	1	1	WDR5	0.718582	0.782962
ENSECAP00000018494	27	22	ALDH1L1	0.953118	0.785323
ENSECAP00000018063	2	2	MOB2	0.770157	0.785745
ENSECAP00000011785	4	4	APOA1BP	0.968595	0.786269
ENSECAP00000009077	3	3	IDE	1.5418	0.786706
ENSECAP00000010965	2	1	RAP2A	0.932935	0.788432
ENSECAP00000000639;ENSECAP00000020679	13	2	RAB11B	0.98009	0.788521
ENSECAP00000016424	1	1	CCDC66	1.1596	0.789745
ENSECAP00000014132	1	1	VPS18	1.34441	0.789789
ENSECAP00000022211	5	5	CRISPLD2	0.98972	0.790402
ENSECAP00000019626;ENSECAP00000006603	23	20	CPNE3	1.1067	0.790665
ENSECAP00000005379	6	3	COMT	0.98923	0.790919
ENSECAP00000011232	44	36	MMP9	1.12899	0.791304
ENSECAP00000006669	1	1	S100A7	1.08298	0.792967
ENSECAP00000021887	22	20	PGM1	0.956236	0.796119
ENSECAP00000009598	4	4	BLVRA	1.3054	0.796412
ENSECAP00000010330	8	5	GLIPR2	0.98168	0.797821
ENSECAP00000018190	2	2	RAP1GAP2	1.32251	0.799468
ENSECAP00000013319	2	2	GLIPR1	0.933148	0.800749
ENSECAP00000020716	3	3	GPCPD1	0.858766	0.800969
ENSECAP00000010610	1	1	VPS37C	10.0401	0.801122
ENSECAP00000014588	6	4	PSMC2	1.16149	0.801373
ENSECAP00000014992	1	1	BCAP29	1.68241	0.802317
ENSECAP00000019390	1	1	GCLM	0.971803	0.802647
ENSECAP00000020689	1	1	CD109	0.980685	0.802753
ENSECAP00000020680	4	2	USP14	0.915628	0.802901
ENSECAP00000006704	3	3	ARL6IP5	1.09912	0.803334
ENSECAP00000007351	1	1	LANCL1	1.0413	0.803994
ENSECAP00000012062	3	3	SNRPD1	1.2244	0.804198
ENSECAP00000017442	2	2	FASN	1.0403	0.804546
ENSECAP00000020183	1	1	PTTG1IP	0.971228	0.806121
ENSECAP00000010429;ENSECAP00000012449	3	2	AHCYL1	1.14322	0.807519
ENSECAP00000013992;ENSECAP00000016184	19	18	ANXA1	0.93923	0.807522
ENSECAP00000018483	1	1	CTSC	0.188022	0.808521
ENSECAP00000012441	4	4	DENND3	1.11176	0.809835
ENSECAP00000006177	2	1	CBX5	0.198262	0.811061
ENSECAP00000014954	4	2	PRKACA	1.06109	0.811622
ENSECAP00000011548	1	1	FAM45A	1.08865	0.812067
ENSECAP00000010070	10	4	RAB2A	1.10235	0.812509
ENSECAP00000001689	2	1	CAB39L	1.49389	0.81279
ENSECAP00000009930	4	3	HEXA	0.987805	0.812798
ENSECAP00000019979	1	1	REV3L	0.980242	0.813083
ENSECAP00000010144	1	1	CUL9	0.924169	0.813087
ENSECAP00000009785	4	3	ARHGAP30	1.1109	0.813517
ENSECAP00000021753	4	4	TBC1D23	1.00735	0.813818
ENSECAP00000010459	4	4	PSMD12	0.84444	0.814454
ENSECAP00000001474	3	3	DMTN	1.97604	0.817874
ENSECAP00000000433	3	2	BPGM	1.20838	0.818068
ENSECAP00000011177	1	1	ACP2	0.980539	0.819321
ENSECAP00000014489	3	2	PPM1A	1.13265	0.819609
ENSECAP00000015175	3	2	SNX5	1.0868	0.820571
ENSECAP00000017204	11	9	OXSR1	0.985291	0.820637
ENSECAP00000016422	1	1	ADCK5	0.917259	0.825311
ENSECAP00000021268	30	26	TGM3	0.942439	0.825813
ENSECAP00000015825	1	1	FKBP3	1.21473	0.826437
ENSECAP00000022017	1	1	ARMC2	1.15508	0.826563
ENSECAP00000006714;ENSECAP00000011069	9	9	STAT5B	0.955994	0.826624
ENSECAP00000005702	2	1	PPP1R18	0.0416413	0.826757
ENSECAP00000015014	4	4	TREM1	1.18211	0.827192
ENSECAP00000004785	1	1	KCNT1	0.974602	0.828064
ENSECAP00000013960	1	1	KPNA3	0.64466	0.82861
ENSECAP00000016906	1	1	CARHSP1	0.448963	0.828611
ENSECAP00000007300	1	1	HIPK2	1.08751	0.828711
ENSECAP00000019071	19	16	HP	0.973769	0.829897
ENSECAP00000010672	1	1	TMED7	1.20653	0.831025
ENSECAP00000006503	2	2	CRYZ	0.951825	0.831639
ENSECAP00000019371	9	9	TTLL12	1.34245	0.83202
ENSECAP00000015582	4	4	FKBP15	0.911505	0.832656
ENSECAP00000011789	1	1	RPS3	0.664065	0.833131
ENSECAP00000012684	4	4	GSDMD	0.943679	0.833231
ENSECAP00000015847	1	1	DSG1	0.553543	0.833608
ENSECAP00000006620	1	1	EXOC5	1.28183	0.833913
ENSECAP00000014473	15	15	VAT1	1.11907	0.834036
ENSECAP00000003180	21	18	CPNE1	0.990814	0.834774
ENSECAP00000018525;ENSECAP00000008271	20	18	ACTR3	1.07579	0.835324
ENSECAP00000021726	1	1	CASP10	1.05352	0.835918
ENSECAP00000018627	4	3	PDCD6	1.05781	0.836347
ENSECAP00000022552	8	8	ATP6V1C1	1.07994	0.837148
ENSECAP00000014809	3	2	PPM1B	1.43727	0.83738
ENSECAP00000002134	1	1	KCNA10	1.56391	0.837835
ENSECAP00000016312	4	3	ARL6IP1	0.954189	0.838398
ENSECAP00000013867	12	12	DAK	0.966339	0.839394
ENSECAP00000010651	2	2	TRA2B	1.06168	0.84145
ENSECAP00000009436	5	5	DHX58	1.74886	0.842407
ENSECAP00000000401	5	3	SIGLEC14	1.35905	0.842621
ENSECAP00000013950	2	2	AP2S1	1.24465	0.844413
ENSECAP00000008154;ENSECAP00000009006;ENSECAP00000020148	16	14	ACSL1	1.11886	0.844557
ENSECAP00000005327	9	1	H3F3A	1.01608	0.844954
ENSECAP00000001397	1	1	ATHL1	1.09911	0.845275
ENSECAP00000019166	11	3	EIF4A2	1.13232	0.846937
ENSECAP00000022267;ENSECAP00000002094;ENSECAP00000001640	6	6	PRPS2	1.07413	0.849677
ENSECAP00000017592	5	5	PDS5B	1.33673	0.850492
ENSECAP00000012698	2	1	OFD1	1.40796	0.851881
ENSECAP00000016970	3	3	NLRX1	0.960709	0.852246
ENSECAP00000013772	2	2	OSBPL9	9.49173	0.853876
ENSECAP00000016942	1	1	GUK1	1.12622	0.854728
ENSECAP00000005430	11	10	ME2	0.965298	0.856986
ENSECAP00000016602	8	8	CNDP2	0.989942	0.857054
ENSECAP00000022393	1	1	ITIH1	1.03009	0.857454
ENSECAP00000016759	33	19	HSP90AA1	0.988204	0.857627
ENSECAP00000018111	10	9	GART	1.11707	0.859
ENSECAP00000009175	1	1	PPP2R5E	0.582306	0.860428
ENSECAP00000015662	2	2	HAAO	1.10194	0.860472
ENSECAP00000014918	1	1	AIP	1.30372	0.861075
ENSECAP00000018735	3	1	ARL8A	0.980576	0.86149
ENSECAP00000002356;ENSECAP00000008796;ENSECAP00000014009;ENSECAP00000009540;ENSECAP00000016594	5	1	HLA-G	1.67173	0.862019
ENSECAP00000005837;ENSECAP00000006744	18	12	FGR	1.03224	0.863505
ENSECAP00000000334	7	5	IGHM	1.3337	0.863918
ENSECAP00000012604	2	1	TPT1	0.785641	0.865061
ENSECAP00000017311	6	6	INPP5D	1.19532	0.866232
ENSECAP00000016075	2	2	STK38	1.34726	0.866811
ENSECAP00000004759	2	1	RRAGB	1.27943	0.866844
ENSECAP00000013759	1	1	NAGLU	1.13906	0.867031
ENSECAP00000011509	4	3	TSNAX	0.997834	0.867535
ENSECAP00000005335	1	1	CNTNAP2	1.02949	0.867574
ENSECAP00000009612	1	1	FCGBP	1.41815	0.867846
ENSECAP00000003535	1	1	GPC4	1.07448	0.86814
ENSECAP00000018699	3	3	RPL5	1.03512	0.868536
ENSECAP00000007748	7	3	RAC1	1.10216	0.869454
ENSECAP00000018341;ENSECAP00000003618	6	4	RAB4A	1.03276	0.869954
ENSECAP00000019290	4	4	SEC24C	1.11327	0.870308
ENSECAP00000008913	28	5	AHCY	1.31847	0.870392
ENSECAP00000021965	2	2	SPI1	2.68192	0.872208
ENSECAP00000005353	1	1	ASNA1	0.77409	0.8724
ENSECAP00000010388	2	2	PFKFB3	1.33267	0.873655
ENSECAP00000012762	12	12	GANAB	1.00144	0.874391
ENSECAP00000008370	1	1	LILRA5	0.824529	0.875268
ENSECAP00000007802	1	1	CD46	1.00226	0.87605
ENSECAP00000005567	18	18	ANXA5	1.07347	0.876415
ENSECAP00000009720	19	11	EHD1	0.999345	0.877032
ENSECAP00000022225	1	1	INPP1	0.920907	0.877058
ENSECAP00000013602	2	2	NAPSA	0.788407	0.877364
ENSECAP00000000990	1	1	OR5P2	0.804742	0.877578
ENSECAP00000019580	3	1	PPP4C	1.39948	0.878641
ENSECAP00000013211	3	2	MARS	1.12757	0.878961
ENSECAP00000019554	1	1	EIF3A	1.50509	0.881403
ENSECAP00000013712	4	1	GNPDA2	0.812968	0.88159
ENSECAP00000011471	2	2	GORASP2	1.32087	0.882026
ENSECAP00000011773	2	2	RPL10A	1.17246	0.88273
ENSECAP00000017499	9	8	PAICS	1.09101	0.883124
ENSECAP00000017378	2	1	PIK3CG	1.16708	0.883374
ENSECAP00000009338	4	4	NUDT2	0.991686	0.883544
ENSECAP00000021990	7	7	RARS	1.41581	0.88382
ENSECAP00000020464	19	12	DNM2	1.04098	0.884311
ENSECAP00000009281	11	11	LBR	1.07654	0.884328
ENSECAP00000008058	2	1	CARKD	2.44621	0.88458
ENSECAP00000022295	2	2	COPS2	1.03491	0.885347
ENSECAP00000009522	21	21	ARPC2	1.07318	0.886207
ENSECAP00000008238;ENSECAP00000015959	5	4	ERLIN2	0.989308	0.887035
ENSECAP00000019700	2	2	VNN1	1.06393	0.887627
ENSECAP00000020085	3	3	PDLIM7	1.11579	0.889543
ENSECAP00000001111	18	18	TYMP	0.992698	0.890595
ENSECAP00000017836	5	3	PIK3R1	1.07502	0.891065
ENSECAP00000019124	3	3	PSMB2	1.0447	0.891481
ENSECAP00000007062;ENSECAP00000004228	18	17	BIN2	0.996603	0.892116
ENSECAP00000013857	1	1	RAE1	0.932642	0.894507
ENSECAP00000005935	1	1	TBC1D13	3.10834	0.896196
ENSECAP00000008732	1	1	RLTPR	0.271047	0.896794
ENSECAP00000019094	7	7	SULT1A1	1.05701	0.898024
ENSECAP00000016080;ENSECAP00000016037;ENSECAP00000006055	11	8	PRKCB	0.981396	0.898718
ENSECAP00000022214;ENSECAP00000008632	3	3	CYTH1	1.07102	0.899235
ENSECAP00000021106	24	22	ARHGAP4	1.03485	0.899581
ENSECAP00000011794	10	8	HNRNPR	1.19655	0.899669
ENSECAP00000009072	1	1	TMEM200C	2.31058	0.899931
ENSECAP00000007094	3	3	AARS	1.05079	0.900081
ENSECAP00000016972;ENSECAP00000013599	12	9	PTBP1	1.04933	0.900726
ENSECAP00000008359	4	4	YKT6	1.11458	0.900757
ENSECAP00000010447	1	1	SND1	0.875267	0.901365
ENSECAP00000013589	13	6	CAMP	1.01173	0.902002
ENSECAP00000004256	1	1	TSG101	1.51127	0.902391
ENSECAP00000020017;ENSECAP00000008363	7	5	MAP2K3	1.06799	0.902962
ENSECAP00000022699	1	1	HMGCL	0.466763	0.903099
ENSECAP00000013487	5	4	PPP6C	1.02157	0.903409
ENSECAP00000017837;ENSECAP00000009025	2	2	CD63	1.05758	0.904676
ENSECAP00000013056	3	3	LSP1	1.17411	0.905528
ENSECAP00000011816	5	4	EIF3B	0.968204	0.905852
ENSECAP00000022084;ENSECAP00000002026	9	9	ACTR1A	0.991634	0.905869
ENSECAP00000010916	3	3	SUGT1	1.07612	0.906709
ENSECAP00000019334	1	1	DUSP12	0.86324	0.907085
ENSECAP00000014670	2	2	PHB2	1.06123	0.908059
ENSECAP00000006869	9	9	PSMD1	1.01764	0.909071
ENSECAP00000007103	5	4	SRGN	1.22324	0.910128
ENSECAP00000016777;ENSECAP00000003518	5	5	UBE2L3	1.01545	0.910388
ENSECAP00000016711	6	1	SIRPB1	0.274154	0.911856
ENSECAP00000009848	2	2	SYTL3	1.13397	0.913256
ENSECAP00000021292	2	1	IARS	2.87097	0.913504
ENSECAP00000010937;ENSECAP00000003181	49	33	MSN	0.998347	0.913593
ENSECAP00000021701	66	58	IQGAP1	1.04195	0.913776
ENSECAP00000013839	9	9	HADHA	0.933467	0.914722
ENSECAP00000016915	2	2	GMPPB	1.18428	0.915049
ENSECAP00000016371	5	4	NEK9	1.11597	0.915335
ENSECAP00000009479	20	19	TALDO1	1.00624	0.915684
ENSECAP00000005402	1	1	VPS11	1.08692	0.915783
ENSECAP00000011716	5	5	CDA	1.08762	0.916924
ENSECAP00000015154	5	5	MTC1	1.26228	0.920293
ENSECAP00000017299	1	1	DDOST	0.302085	0.920478
ENSECAP00000013490	1	1	NDUFS1	1.5603	0.921344
ENSECAP00000009743	3	3	GMPPA	1.0583	0.922052
ENSECAP00000019271	19	14	ROCK1	0.999979	0.922103
ENSECAP00000009872	2	2	TBC1D10C	1.01261	0.923101
ENSECAP00000003448	6	6	TPP2	1.03334	0.924126
ENSECAP00000015946	1	1	IRF3	1.14333	0.924225
ENSECAP00000013259	1	1	ALAD	0.522281	0.924706
ENSECAP00000015507	25	16	GDI1	1.0109	0.925445
ENSECAP00000010266	3	2	KCNAB2	1.17485	0.925624
ENSECAP00000020569	1	1	NMRAL1	1.06746	0.925831
ENSECAP00000010824	4	2	ALDH9A1	1.06322	0.927493
ENSECAP00000003199	1	1	OR8A1	1.28408	0.92765
ENSECAP00000011323	1	1	TCEA1	1.19653	0.927772
ENSECAP00000022640	3	3	AMPD2	1.07021	0.928037
ENSECAP00000008248	2	1	SGTA	1.06018	0.928212
ENSECAP00000019337	3	2	NIPSNAP1	1.02144	0.928323
ENSECAP00000016531	44	42	GPI	1.09403	0.928831
ENSECAP00000000106	1	1	COX5A	0.944295	0.929992
ENSECAP00000004602	31	29	PDCD6IP	1.02274	0.93023
ENSECAP00000016844	2	1	UBQLN1	0.545332	0.930611
ENSECAP00000006104;ENSECAP00000006119	5	1	ATP2A2	1.11916	0.930974
ENSECAP00000007251;ENSECAP00000008706	14	14	NCF4	1.07461	0.931102
ENSECAP00000002539	1	1	GCC2	1.05038	0.931498
ENSECAP00000015826;ENSECAP00000012983;ENSECAP00000007277	23	22	ALDH2	1.00818	0.933332
ENSECAP00000013265	5	5	DERA	1.0143	0.933529
ENSECAP00000011140	7	7	AP1G1	1.27081	0.934005
ENSECAP00000009053	1	1	HSD17B8	4.2046	0.934909
ENSECAP00000019837	1	1	PPIL1	1.37564	0.935248
ENSECAP00000000041	1	1	AIMP2	1.31617	0.935804
ENSECAP00000013187	17	11	TCN1	0.990747	0.936743
ENSECAP00000018911	12	12	MMP8	1.04588	0.937265
ENSECAP00000004985	1	1	VPS28	1.98183	0.938562
ENSECAP00000007494	2	1	IGHE	3.18449	0.938952
ENSECAP00000000286	1	1	PIN4	1.17091	0.939641
ENSECAP00000017604	5	4	STX7	1.06374	0.939666
ENSECAP00000013844	9	7	CSE1L	1.07735	0.941616
ENSECAP00000000171	4	4	SEMA7A	0.983645	0.942435
ENSECAP00000017931	3	2	RBBP7	1.03784	0.942961
ENSECAP00000018000;ENSECAP00000004003	8	8	ARPC3	1.01159	0.945106
ENSECAP00000018848;ENSECAP00000006952	6	5	BTK	0.944672	0.945118
ENSECAP00000010530	10	10	UBA6	1.21858	0.945725
ENSECAP00000007969	3	3	USP7	0.845294	0.946079
ENSECAP00000008781	3	3	PPME1	0.925678	0.946455
ENSECAP00000003203	13	12	CTSG	1.01631	0.946578
ENSECAP00000016044	7	7	PSME2	1.09582	0.947257
ENSECAP00000006143	11	9	HP1BP3	1.01593	0.94782
ENSECAP00000017427	1	1	GRIPAP1	1.02302	0.948362
ENSECAP00000008228	1	1	YARS	2.82855	0.949182
ENSECAP00000015956	2	2	BRE	1.271	0.949857
ENSECAP00000019888	6	6	GCA	1.1223	0.950268
ENSECAP00000012772;ENSECAP00000013964	32	24	CD177	1.00264	0.951186
ENSECAP00000005954	21	19	NPEPPS	1.0429	0.951434
ENSECAP00000007678	3	2	NCSTN	1.11129	0.953041
ENSECAP00000017797	2	2	DIABLO	1.14452	0.953148
ENSECAP00000004941	1	1	SLC17A3	1.25214	0.953628
ENSECAP00000018042;ENSECAP00000009334	5	5	INPP5B	1.03104	0.953777
ENSECAP00000009231	2	1	HGS	0.862457	0.956123
ENSECAP00000005673	2	1	IMPDH2	1.06697	0.956334
ENSECAP00000020814;ENSECAP00000012486	71	61	LCP1	1.06544	0.957595
ENSECAP00000017177	31	26	PGD	1.05167	0.958243
ENSECAP00000013311	1	1	DYNLL2	1.10581	0.958358
ENSECAP00000017163	1	1	ENOPH1	2.3213	0.959004
ENSECAP00000021677	4	4	OGDH	1.07721	0.959014
ENSECAP00000007296	2	1	TBCA	0.617022	0.959636
ENSECAP00000006675	1	1	RPL7A	2.33076	0.960461
ENSECAP00000015162;ENSECAP00000017748	7	3	RPS6KA1	1.04523	0.960921
ENSECAP00000019911	2	1	NPEPL1	1.02186	0.961951
ENSECAP00000022136	2	1	TNPO1	1.07902	0.963354
ENSECAP00000013651	4	1	RRAGD	0.994623	0.964008
ENSECAP00000017838	3	1	GRK6	0.990472	0.964351
ENSECAP00000008483;ENSECAP00000011074	9	8	RAB27A	1.00022	0.964429
ENSECAP00000003060	5	5	PRG3	0.653965	0.965153
ENSECAP00000020931	2	1	SIRPB1	1.1676	0.965342
ENSECAP00000000814	3	2	DNAJA1	1.1038	0.967293
ENSECAP00000005878	2	2	COMMD7	1.27416	0.967936
ENSECAP00000015818;ENSECAP00000010019	11	9	ARRB1	0.992906	0.968351
ENSECAP00000005033	5	1	H3F3A	0.983474	0.969874
ENSECAP00000011463	1	1	SH2D5	0.283936	0.970054
ENSECAP00000021934	6	6	COPE	1.00858	0.970467
ENSECAP00000010340	7	7	CAPNS1	1.00073	0.972074
ENSECAP00000011800	3	3	COPS5	1.08075	0.972113
ENSECAP00000017425	3	1	GMPR2	0.596092	0.972151
ENSECAP00000017495	2	1	ADAMDEC1	0.758218	0.972456
ENSECAP00000020224	2	2	CCS	1.35948	0.973256
ENSECAP00000010684	11	8	SNX6	1.00899	0.973309
ENSECAP00000010194	8	8	IDH1	1.00276	0.974103
ENSECAP00000018574	8	7	SVIL	1.07984	0.974319
ENSECAP00000005891	13	11	SNX2	1.0407	0.97542
ENSECAP00000009491	8	7	RAB14	1.1126	0.975661
ENSECAP00000012473	11	6	MAPK3	1.09611	0.975868
ENSECAP00000007132	19	17	ACTR2	1.04157	0.976361
ENSECAP00000008043	1	1	BTBD11	1.07383	0.977211
ENSECAP00000004202	1	1	NUDT3	1.19705	0.978205
ENSECAP00000018673	14	12	PFKP	0.994652	0.978957
ENSECAP00000021077	5	5	DSCR3	1.22598	0.980354
ENSECAP00000004550	3	2	RAB21	1.01559	0.980427
ENSECAP00000017765	1	1	GAB2	1.07122	0.980657
ENSECAP00000021590	1	1	EQMHCB2	1.13648	0.98183
ENSECAP00000011516	1	1	TTC38	0.867551	0.982242
ENSECAP00000015357	9	8	CFP	1.00219	0.984041
ENSECAP00000010253	2	2	B4GALT1	0.978286	0.984582
ENSECAP00000019663	52	32	ACTN4	1.01968	0.984996
ENSECAP00000014372	1	1	BAX	0.753223	0.985262
ENSECAP00000022660	46	41	MVP	0.994793	0.986475
ENSECAP00000017735;ENSECAP00000015300	3	1	RAP2C	1.04452	0.987254
ENSECAP00000009151	4	4	PPA2	0.976074	0.987877
ENSECAP00000004714	7	5	PRG2	0.823203	0.988047
ENSECAP00000019738	13	12	COPB1	1.04817	0.989408
ENSECAP00000001095	28	23	PTPN6	1.01974	0.990527
ENSECAP00000000135	4	4	GOT1	1.12035	0.990542
[truncated: 14 more rows]
