# Supplementary material for: Latently Activated Granulocytes From an Autoimmune Uveits Model Show Divergent Pathway Activation Profiles Upon IL8 Stimulation <em>in vitro</em>
Source: Preprints.org preprint supplement (doi:10.20944/preprints202206.0031.v1), 2022-06-02
Supplement: Supplementary file 2 [file Table S2_IPA analysis results.xlsx]

## Sheet: Table S2 IPA results
Supplementary Table S2: all IPA analysis results from input gene list as displayed in Table S1
© 2000-2022 QIAGEN. All rights reserved.
Analysis ID	39518154
Experimental Metadata
originalColumnNames	Accession,Gene symbol
Analysis Settings
Cutoff before duplicate resolution	true
Resolve duplicate on	Expression foldchange
Color using	Expression foldchange
Cutoff for Expression foldchange	--
Cutoff for Expression pvalue	0.05
Reference set	Ingenuity Knowledge Base (Genes + Endogenous Chemicals)
Relationship to include	Direct and Indirect
Includes Endogenous Chemicals	Yes
Optional Analyses	My Pathways My List
Filter Summary
Consider only molecules and/or relationships where
(confidence = Experimentally Observed) AND
(mol. types = biologic drug OR canonical pathway OR chemical - endogenous mammalian OR chemical - endogenous non-mammalian OR chemical - kinase inhibitor OR chemical - other OR chemical - protease inhibitor OR chemical drug OR chemical reagent OR chemical toxicant OR complex OR cytokine OR disease OR enzyme OR function OR fusion gene/product OR G-protein coupled receptor OR group OR growth factor…
Canonical Pathways for My Projects->eqGranulocytes_IL8
Ingenuity Canonical Pathways	-log(p-value)	zScore	Ratio	Molecules
Allograft Rejection Signaling	0		0.00412	B2M,FCER1G
Altered T Cell and B Cell Signaling in Rheumatoid Arthritis	0		0.00407	FCER1G,RELA
Autoimmune Thyroid Disease Signaling	0		0.00219	FCER1G
B Cell Receptor Signaling	0		0.00472	CDC42,GSK3A,RELA
CCR5 Signaling in Macrophages	0		0.00397	FCER1G,GNB1
CD28 Signaling in T Helper Cells	0		0.00575	CDC42,FCER1G,RELA
CREB Signaling in Neurons	0		0.00489	GNB1,LTB4R,PRKAR2B
CTLA4 Signaling in Cytotoxic T Lymphocytes	0		0.00418	B2M,FCER1G
Calcium-induced T Lymphocyte Apoptosis	0		0.00216	FCER1G
Communication between Innate and Adaptive Immune Cells	0		0.00215	B2M,FCER1G
Corticotropin Releasing Hormone Signaling	0		0.00621	PRKAR2B
Dendritic Cell Maturation	0		0.00506	B2M,FCER1G,RELA
Dopamine-DARPP32 Feedback in cAMP Signaling	0		0.00505	PRKAR2B
Erythropoietin Signaling Pathway	0		0.00546	RELA
FAK Signaling	0	-0.816497	0.00575	FCER1G,GSK3A,ITGA2B,LTB4R,PXN,WIPF1
Ferroptosis Signaling Pathway	0		0.00617	PEBP1
Glioblastoma Multiforme Signaling	0		0.00568	CDC42
Graft-versus-Host Disease Signaling	0		0.00224	FCER1G
Granulocyte Adhesion and Diapedesis	0		0.00524	MMP25
Gustation Pathway	0		0.00448	PRKAR2B
Hematopoiesis from Pluripotent Stem Cells	0		0.00226	FCER1G
Hepatic Fibrosis / Hepatic Stellate Cell Activation	0		0.00505	RELA
ICOS-ICOSL Signaling in T Helper Cells	0		0.00391	FCER1G,RELA
ID1 Signaling Pathway	0		0.00498	S100A9
IL-15 Signaling	0		0.00189	RELA
Lipid Antigen Presentation by CD1	0		0.00481	B2M,FCER1G
NAD Signaling Pathway	0		0.00592	HSPD1
NF-κB Signaling	0		0.00351	FCER1G,RELA
NUR77 Signaling in T Lymphocytes	0		0.00585	B2M,CYCS,FCER1G
Neuroinflammation Signaling Pathway	0		0.00602	B2M,RELA
Neurovascular Coupling Signaling Pathway	0		0.00398	PRKAR2B
OX40 Signaling Pathway	0		0.00626	B2M,FCER1G,RELA
Ovarian Cancer Signaling	0		0.00625	PRKAR2B
Oxytocin In Brain Signaling Pathway	0		0.00495	GNB1
PKCθ Signaling in T Lymphocytes	0		0.00356	FCER1G,RELA
Regulation of IL-2 Expression in Activated and Anergic T Lymphocytes	0		0.00432	FCER1G,RELA
Regulation of the Epithelial-Mesenchymal Transition Pathway	0		0.00513	RELA
Role of Macrophages, Fibroblasts and Endothelial Cells in Rheumatoid Arthritis	0		0.00599	MIF,RELA
Role of Osteoblasts, Osteoclasts and Chondrocytes in Rheumatoid Arthritis	0		0.00435	RELA
SAPK/JNK Signaling	0		0.00596	CDC42,FCER1G,GNB1
Senescence Pathway	0		0.0033	MCU
Sirtuin Signaling Pathway	0		0.00615	ATP5F1C,RELA
Systemic Lupus Erythematosus In B Cell Signaling Pathway	0		0.00137	RELA
Systemic Lupus Erythematosus In T Cell Signaling Pathway	0		0.00463	B2M,CDC42,FCER1G
Systemic Lupus Erythematosus Signaling	0		0.00479	FCER1G,HNRNPA2B1,HNRNPC
T Cell Exhaustion Signaling Pathway	0		0.00175	FCER1G
T Cell Receptor Signaling	0	-1	0.00646	B2M,FCER1G,GSK3A,RELA
T Helper Cell Differentiation	0		0.00212	FCER1G
Th17 Activation Pathway	0		0.00617	FCER1G,HSP90B1,RELA
Type II Diabetes Mellitus Signaling	0		0.00575	RELA
Endocannabinoid Cancer Inhibition Pathway	0.198		0.00649	PRKAR2B
Iron homeostasis signaling pathway	0.198		0.00649	ATP6AP1
PI3K Signaling in B Lymphocytes	0.208		0.00676	RELA
Xenobiotic Metabolism General Signaling Pathway	0.21		0.0068	GSTO1
Hereditary Breast Cancer Signaling	0.215		0.00694	ACTB
CCR3 Signaling in Eosinophils	0.223		0.00714	GNB1
MSP-RON Signaling In Cancer Cells Pathway	0.223		0.00714	RELA
GABA Receptor Signaling	0.224		0.00719	GNB1
Synaptic Long Term Potentiation	0.224		0.00719	PRKAR2B
FXR/RXR Activation	0.228		0.0073	APOE
IL-6 Signaling	0.247		0.00781	RELA
Neuroprotective Role of THOP1 in Alzheimer's Disease	0.251		0.00794	PRKAR2B
GPCR-Mediated Nutrient Sensing in Enteroendocrine Cells	0.254		0.008	PRKAR2B
Fc Epsilon RI Signaling	0.256		0.00806	FCER1G
Sphingosine-1-phosphate Signaling	0.256		0.00806	CDC42
IL-15 Production	0.258		0.00813	RELA
MSP-RON Signaling In Macrophages Pathway	0.26		0.0082	RELA
Breast Cancer Regulation by Stathmin1	0.264	1	0.0067	GNB1,LTB4R,PRKAR2B,TUBB1
Role of NFAT in Regulation of the Immune Response	0.266		0.00672	FCER1G,GNB1,GSK3A,RELA
CDK5 Signaling	0.27		0.00847	PRKAR2B
Role of MAPK Signaling in Promoting the Pathogenesis of Influenza	0.275		0.00862	ATP6AP1
Antiproliferative Role of TOB in T Cell Signaling	0.28		0.00704	DPP7,FCER1G,PABPC1
Cytotoxic T Lymphocyte-mediated Apoptosis of Target Cells	0.282		0.00706	B2M,CYCS,FCER1G
Chronic Myeloid Leukemia Signaling	0.299		0.00935	RELA
NER (Nucleotide Excision Repair, Enhanced Pathway)	0.299		0.00935	UBE2I
PD-1, PD-L1 cancer immunotherapy pathway	0.299		0.00935	B2M
Telomerase Signaling	0.299		0.00935	HSP90B1
Neuropathic Pain Signaling In Dorsal Horn Neurons	0.305		0.00952	PRKAR2B
Apelin Cardiomyocyte Signaling Pathway	0.307		0.00962	MYL12A
Melanocyte Development and Pigmentation Signaling	0.319		0.01	PRKAR2B
Non-Small Cell Lung Cancer Signaling	0.319		0.01	STK4
UVA-Induced MAPK Signaling	0.323		0.0101	CYCS
p53 Signaling	0.326		0.0102	THBS1
Pyroptosis Signaling Pathway	0.332		0.0104	PRKAR2B
TGF-β Signaling	0.332		0.0104	CDC42
Acute Myeloid Leukemia Signaling	0.339		0.0106	RELA
ERBB Signaling	0.339		0.0106	CDC42
Dopamine Receptor Signaling	0.342		0.0108	PRKAR2B
RANK Signaling in Osteoclasts	0.346		0.0109	RELA
Apelin Adipocyte Signaling Pathway	0.349		0.011	PRKAR2B
TR/RXR Activation	0.349		0.011	SLC16A3
Role of NFAT in Cardiac Hypertrophy	0.358		0.00873	GNB1,PRKAR2B
Regulation Of The Epithelial Mesenchymal Transition In Development Pathway	0.363		0.0115	RELA
Autophagy	0.364		0.00885	GSK3A,PRKAR2B
Calcium Signaling	0.364		0.00885	MCU,PRKAR2B
Eicosanoid Signaling	0.367		0.0116	LTB4R
HIPPO signaling	0.367		0.0116	STK4
Estrogen-Dependent Breast Cancer Signaling	0.371		0.0118	RELA
Type I Diabetes Mellitus Signaling	0.374		0.00784	CYCS,FCER1G,HSPD1,RELA
PEDF Signaling	0.375		0.0119	RELA
BEX2 Signaling Pathway	0.379		0.012	RELA
GPCR-Mediated Integration of Enteroendocrine Signaling Exemplified by an L Cell	0.379		0.012	PRKAR2B
Neurotrophin/TRK Signaling	0.379		0.012	CDC42
mTOR Signaling	0.383		0.00917	CDC42,EIF3I
JAK/STAT Signaling	0.383		0.0122	RELA
Maturity Onset Diabetes of Young (MODY) Signaling	0.383		0.0122	APOE
Renal Cell Carcinoma Signaling	0.383		0.0122	CDC42
Antiproliferative Role of Somatostatin Receptor 2	0.387		0.0123	GNB1
Agranulocyte Adhesion and Diapedesis	0.39		0.0093	ACTB,MMP25
IL-7 Signaling Pathway	0.391		0.0125	GSK3A
Leptin Signaling in Obesity	0.391		0.0125	PRKAR2B
Role of BRCA1 in DNA Damage Response	0.391		0.0125	ACTB
HIF1α Signaling	0.392		0.00935	HSPA5,MMP25
Angiopoietin Signaling	0.395		0.0127	RELA
GDNF Family Ligand-Receptor Interactions	0.395		0.0127	CDC42
NF-κB Activation by Viruses	0.395		0.0127	RELA
Toll-like Receptor Signaling	0.395		0.0127	RELA
Melatonin Signaling	0.399		0.0128	PRKAR2B
TREM1 Signaling	0.399		0.0128	RELA
Netrin Signaling	0.404		0.013	PRKAR2B
IL-10 Signaling	0.408		0.0132	RELA
Macropinocytosis Signaling	0.408		0.0132	CDC42
Hepatic Cholestasis	0.412		0.00971	PRKAR2B,RELA
Glioma Invasiveness Signaling	0.417		0.0135	CDC42
Glutamate Receptor Signaling	0.422		0.0137	GNB1
Superpathway of Methionine Degradation	0.422		0.0137	AHCY
IL-17A Signaling in Airway Cells	0.441		0.0145	RELA
WNT/Ca+ pathway	0.441		0.0145	RELA
Role of PI3K/AKT Signaling in the Pathogenesis of Influenza	0.446		0.0147	RELA
Regulation Of The Epithelial Mesenchymal Transition By Growth Factors Pathway	0.45		0.0104	CDC42,RELA
CD40 Signaling	0.451		0.0149	RELA
Xenobiotic Metabolism CAR Signaling Pathway	0.456		0.0105	GSTO1,HSP90B1
Mitotic Roles of Polo-Like Kinase	0.456		0.0152	HSP90B1
IL-17 Signaling	0.459		0.0106	HSP90B1,RELA
ERB2-ERBB3 Signaling	0.462		0.0154	GSK3A
Tumor Microenvironment Pathway	0.462		0.0106	MMP25,RELA
Acute Phase Response Signaling	0.465		0.0107	RELA,VWF
PFKFB4 Signaling Pathway	0.467		0.0156	PRKAR2B
Retinoic acid Mediated Apoptosis Signaling	0.473		0.0159	CYCS
Endometrial Cancer Signaling	0.478		0.0161	ILK
Semaphorin Signaling in Neurons	0.478		0.0161	CDC42
GADD45 Signaling	0.49		0.0167	RELA
MSP-RON Signaling Pathway	0.496		0.0169	ACTB
Role of IL-17A in Arthritis	0.496		0.0169	RELA
WNT/β-catenin Signaling	0.506		0.0115	GSK3A,ILK
Retinol Biosynthesis	0.515		0.0179	DHRS7
Phagosome Formation	0.515	0	0.00855	CDC42,FCER1G,ITGA2B,LTB4R,MYL12A,WIPF1
Human Embryonic Stem Cell Pluripotency	0.516		0.0117	GNB1,GSK3A
Insulin Secretion Signaling Pathway	0.52		0.0101	NAPA,PABPC1,PRKAR2B
Transcriptional Regulatory Network in Embryonic Stem Cells	0.528		0.0185	SET
Xenobiotic Metabolism Signaling	0.528		0.0102	GSTO1,HSP90B1,RELA
HMGB1 Signaling	0.53		0.012	CDC42,RELA
CLEAR Signaling Pathway	0.536		0.0103	ATP6AP1,GSK3A,STK4
Opioid Signaling Pathway	0.536		0.0103	CDC42,GNB1,PRKAR2B
Oxytocin Signaling Pathway	0.536		0.0103	GNB1,PRKAR2B,RELA
HOTAIR Regulatory Pathway	0.537		0.0121	MMP25,RELA
Amyloid Processing	0.541		0.0192	PRKAR2B
Endocannabinoid Neuronal Synapse Pathway	0.544		0.0123	GNB1,PRKAR2B
Apelin Muscle Signaling Pathway	0.549		0.0196	GNB1
FAT10 Cancer Signaling Pathway	0.556		0.02	RELA
Glutathione-mediated Detoxification	0.556		0.02	GSTO1
iNOS Signaling	0.556		0.02	RELA
Circadian Rhythm Signaling	0.557		0.0106	GNB1,GSK3A,PRKAR2B
Acetone Degradation I (to Methylglyoxal)	0.563		0.0204	DHRS7
Ephrin A Signaling	0.563		0.0204	CDC42
Role of Pattern Recognition Receptors in Recognition of Bacteria and Viruses	0.571		0.0128	RELA,RNASEL
Gluconeogenesis I	0.571		0.0208	ALDOC
G Protein Signaling Mediated by Tubby	0.579		0.0213	GNB1
Role of IL-17F in Allergic Inflammatory Airway Diseases	0.579		0.0213	RELA
White Adipose Tissue Browning Pathway	0.586		0.0132	FCER1G,PRKAR2B
IL-23 Signaling Pathway	0.587		0.0217	RELA
Role of RIG1-like Receptors in Antiviral Innate Immunity	0.587		0.0217	RELA
Sperm Motility	0.592		0.0111	GNB1,PDE4D,PRKAR2B
Apelin Endothelial Signaling Pathway	0.599		0.0134	GNB1,RELA
BER (Base Excision Repair) Pathway	0.603		0.0227	HUWE1
Insulin Receptor Signaling	0.611		0.0137	GSK3A,PRKAR2B
B Cell Activating Factor Signaling	0.612		0.0233	RELA
Glycolysis I	0.612		0.0233	ALDOC
Superpathway of Inositol Phosphate Compounds	0.616		0.0115	ATP1A1,MINPP1,SET
April Mediated Signaling	0.621		0.0238	RELA
Mechanisms of Viral Exit from Host Cells	0.63		0.0244	ACTB
IL-12 Signaling and Production in Macrophages	0.637		0.0143	APOE,RELA
Reelin Signaling in Neurons	0.637		0.0143	APOE,CDC42
Inhibition of Matrix Metalloproteases	0.639		0.025	MMP25
Antigen Presentation Pathway	0.649		0.0256	B2M
Cysteine Biosynthesis III (mammalia)	0.649		0.0256	AHCY
Inhibition of Angiogenesis by TSP1	0.649		0.0256	THBS1
Complement System	0.659		0.0263	CD55
IL-17A Signaling in Fibroblasts	0.659		0.0263	RELA
Methylglyoxal Degradation III	0.659		0.0263	DHRS7
Nitric Oxide Signaling in the Cardiovascular System	0.67		0.015	HSP90B1,PRKAR2B
Atherosclerosis Signaling	0.675		0.0152	APOE,RELA
Osteoarthritis Pathway	0.678		0.0123	ITGA2B,RELA,S100A9
Interferon Signaling	0.68		0.0278	RELA
NAD Salvage Pathway II	0.68		0.0278	NT5C1A
Purine Nucleotides Degradation II (Aerobic)	0.68		0.0278	NT5C1A
Renin-Angiotensin Signaling	0.68		0.0153	PRKAR2B,RELA
LXR/RXR Activation	0.685		0.0154	APOE,RELA
14-3-3-mediated Signaling	0.69		0.0155	GSK3A,TUBB1
Gαs Signaling	0.69		0.0155	GNB1,PRKAR2B
Coagulation System	0.691		0.0286	VWF
IL-9 Signaling	0.691		0.0286	RELA
The Visual Cycle	0.691		0.0286	DHRS7
Endocannabinoid Developing Neuron Pathway	0.695		0.0156	GNB1,PRKAR2B
Pancreatic Adenocarcinoma Signaling	0.695		0.0156	CDC42,RELA
4-1BB Signaling in T Lymphocytes	0.702		0.0294	RELA
NGF Signaling	0.705		0.0159	CDC42,RELA
Amyotrophic Lateral Sclerosis Signaling	0.71		0.016	CYCS,RAB5B
Cholecystokinin/Gastrin-mediated Signaling	0.716		0.0161	CDC42,PXN
Methionine Degradation I (to Homocysteine)	0.725		0.0312	AHCY
TNFR2 Signaling	0.725		0.0312	RELA
Neuregulin Signaling	0.726		0.0164	HSP90B1,ITGA2B
Superpathway of D-myo-inositol (1,4,5)-trisphosphate Metabolism	0.738		0.0323	MINPP1
Prostate Cancer Signaling	0.748		0.0169	HSP90B1,RELA
α-Adrenergic Signaling	0.748		0.0169	GNB1,PRKAR2B
TEC Kinase Signaling	0.749		0.0103	ACTB,CDC42,FCER1G,GNB1,ITGA2B,RELA
Sonic Hedgehog Signaling	0.751		0.0333	PRKAR2B
Bladder Cancer Signaling	0.76		0.0172	MMP25,THBS1
3-phosphoinositide Biosynthesis	0.76		0.0136	ATP1A1,MINPP1,SET
CDC42 Signaling	0.76	1	0.0104	B2M,CDC42,FCER1G,ITGA2B,MYL12A,WIPF1
ERK/MAPK Signaling	0.764		0.0136	ITGA2B,PRKAR2B,PXN
Adenosine Nucleotides Degradation II	0.792		0.037	NT5C1A
Phospholipase C Signaling	0.795		0.0102	CDC42,FCER1G,GNB1,ITGA2B,MYL12A,PEBP1,RELA
Gap Junction Signaling	0.801		0.0142	ACTB,PRKAR2B,TUBB1
RAR Activation	0.801		0.0142	ACTB,PRKAR2B,RELA
Sumoylation Pathway	0.802		0.0183	CDC42,UBE2I
Apelin Liver Signaling Pathway	0.807		0.0385	GSK3A
IL-17A Signaling in Gastric Cells	0.807		0.0385	RELA
Role of JAK1, JAK2 and TYK2 in Interferon Signaling	0.807		0.0385	RELA
PPAR Signaling	0.814		0.0187	HSP90B1,RELA
Adrenomedullin signaling pathway	0.819		0.0145	GSK3A,PRKAR2B,RELA
IGF-1 Signaling	0.821		0.0189	PRKAR2B,PXN
Hepatic Fibrosis Signaling Pathway	0.822	0	0.0116	CDC42,ITGA2B,MYL12A,PRKAR2B,RELA
D-myo-inositol-5-phosphate Metabolism	0.827		0.0146	ATP1A1,MINPP1,SET
VEGF Signaling	0.827		0.019	ACTB,PXN
Apoptosis Signaling	0.834		0.0192	CYCS,RELA
Coronavirus Pathogenesis Pathway	0.836		0.0148	ATP6AP1,RELA,TNPO2
Choline Biosynthesis III	0.839		0.0417	PCYT1A
Tumoricidal Function of Hepatic Natural Killer Cells	0.839		0.0417	CYCS
3-phosphoinositide Degradation	0.845		0.0149	ATP1A1,MINPP1,SET
Pulmonary Healing Signaling Pathway	0.845		0.0149	CDC42,MMP25,THBS1
PPARα/RXRα Activation	0.85		0.015	HSP90B1,PRKAR2B,RELA
D-myo-inositol (1,3,4)-trisphosphate Biosynthesis	0.857		0.0435	MINPP1
Guanosine Nucleotides Degradation III	0.857		0.0435	NT5C1A
Pentose Phosphate Pathway	0.857		0.0435	PGLS
Urate Biosynthesis/Inosine 5'-phosphate Degradation	0.857		0.0435	NT5C1A
Production of Nitric Oxide and Reactive Oxygen Species in Macrophages	0.864		0.0152	APOE,CDC42,RELA
Small Cell Lung Cancer Signaling	0.868		0.0202	CYCS,RELA
Xenobiotic Metabolism PXR Signaling Pathway	0.878		0.0155	GSTO1,HSP90B1,PRKAR2B
Sucrose Degradation V (Mammalian)	0.893		0.0476	ALDOC
D-myo-inositol (1,4,5,6)-Tetrakisphosphate Biosynthesis	0.903		0.0159	ATP1A1,MINPP1,SET
D-myo-inositol (3,4,5,6)-tetrakisphosphate Biosynthesis	0.903		0.0159	ATP1A1,MINPP1,SET
Ceramide Signaling	0.905		0.0213	CYCS,RELA
Crosstalk between Dendritic Cells and Natural Killer Cells	0.92		0.0217	ACTB,RELA
Regulation of eIF4 and p70S6K Signaling	0.933		0.0164	EIF3I,ITGA2B,PABPC1
Granzyme A Signaling	0.934		0.0526	SET
Regulation of Cellular Mechanics by Calpain Protease	0.936		0.0222	ITGA2B,PXN
BMP signaling pathway	0.952		0.0227	PRKAR2B,RELA
Gαq Signaling	0.96		0.0169	CDC42,GNB1,RELA
LPS-stimulated MAPK Signaling	0.977		0.0235	CDC42,RELA
Arsenate Detoxification I (Glutaredoxin)	0.98		0.0588	GSTO1
Phosphatidylcholine Biosynthesis I	0.98		0.0588	PCYT1A
eNOS Signaling	0.993		0.0174	HSP90B1,HSPA5,PRKAR2B
Cardiac Hypertrophy Signaling	1		0.0148	CDC42,GNB1,MYL12A,PRKAR2B
Acyl-CoA Hydrolysis	1		0.0625	ACOT1
Granzyme B Signaling	1		0.0625	CYCS
Parkinson's Signaling	1		0.0625	CYCS
Stearate Biosynthesis I (Animals)	1.03		0.0253	ACOT1,DHRS7
Telomere Extension by Telomerase	1.03		0.0667	HNRNPA2B1
Aryl Hydrocarbon Receptor Signaling	1.03		0.0182	GSTO1,HSP90B1,RELA
AMPK Signaling	1.05		0.0154	ACTB,GNB1,PRKAR2B,RAB8A
LPS/IL-1 Mediated Inhibition of RXR Function	1.05		0.0154	APOE,FABP3,FABP5,GSTO1
Role of IL-17A in Psoriasis	1.06		0.0714	S100A9
Epithelial Adherens Junction Signaling	1.06		0.0187	CDC42,MYL12A,STK4
PXR/RXR Activation	1.12		0.0286	PRKAR2B,RELA
Cleavage and Polyadenylation of Pre-mRNA	1.12		0.0833	NUDT21
Dilated Cardiomyopathy Signaling Pathway	1.13		0.02	ACTB,ILK,PRKAR2B
cAMP-mediated signaling	1.15	2	0.0167	LTB4R,MPPE1,PDE4D,PRKAR2B
Cardiac Hypertrophy Signaling (Enhanced)	1.15	-0.816497	0.0126	GNB1,GSK3A,ITGA2B,MPPE1,PDE4D,PRKAR2B,RELA
Eumelanin Biosynthesis	1.16		0.0909	MIF
Pentose Phosphate Pathway (Oxidative Branch)	1.16		0.0909	PGLS
Rapoport-Luebering Glycolytic Shunt	1.16		0.0909	MINPP1
Activation of IRF by Cytosolic Pattern Recognition Receptors	1.18		0.0308	PPIB,RELA
Induction of Apoptosis by HIV1	1.18		0.0308	CYCS,RELA
Gαi Signaling	1.18		0.021	GNB1,LTB4R,PRKAR2B
RAC Signaling	1.19		0.0213	CDC42,ITGA2B,RELA
Thrombin Signaling	1.19		0.0173	CDC42,GNB1,MYL12A,RELA
SNARE Signaling Pathway	1.2		0.0214	NAPA,PRKAR2B,RAB8A
Adenine and Adenosine Salvage I	1.2		0.1	APRT
Pulmonary Fibrosis Idiopathic Signaling Pathway	1.2	-1	0.0153	ACTB,ILK,MMP25,RELA,THBS1
G Beta Gamma Signaling	1.21		0.0216	CDC42,GNB1,PRKAR2B
Phototransduction Pathway	1.21		0.0323	GNB1,PRKAR2B
fMLP Signaling in Neutrophils	1.21		0.0217	CDC42,GNB1,RELA
HGF Signaling	1.24		0.0222	CDC42,ITGA2B,PXN
GP6 Signaling Pathway	1.26		0.0227	FCER1G,GSK3A,ITGA2B
CD27 Signaling in Lymphocytes	1.28		0.0351	CYCS,RELA
Lymphotoxin β Receptor Signaling	1.28		0.0351	CYCS,RELA
IL-8 Signaling	1.29		0.0187	CDC42,GNB1,LASP1,RELA
Glutathione Redox Reactions II	1.29		0.125	GLRX
Spliceosomal Cycle	1.33		0.0377	SF1,U2AF1/U2AF1L5
tRNA Splicing	1.33		0.0377	MPPE1,PDE4D
G-Protein Coupled Receptor Signaling	1.36	-1.66667	0.0126	CDC42,GNB1,LTB4R,MPPE1,MYL12A,PDE4D,PRKAR2B,PXN,RELA
MYC Mediated Apoptosis Signaling	1.36		0.0392	CYCS,PRKAR2B
Antioxidant Action of Vitamin C	1.38		0.0254	GLRX,GSTO1,RELA
Role of Tissue Factor in Cancer	1.38		0.0254	CDC42,P4HB,PDIA6
Glucocorticoid Receptor Signaling	1.4		0.0135	ACTB,ATP5F1C,B2M,FKBP4,HSP90B1,HSPA5,RELA,UBE2I
Apelin Pancreas Signaling Pathway	1.43		0.0426	PRKAR2B,RELA
MIF Regulation of Innate Immunity	1.43		0.0426	MIF,RELA
Coronavirus Replication Pathway	1.44		0.0435	GSK3A,TUBB1
Colorectal Cancer Metastasis Signaling	1.46	-1	0.0181	CDC42,GNB1,MMP25,PRKAR2B,RELA
Cardiac β-adrenergic Signaling	1.47		0.0214	GNB1,MPPE1,PDE4D,PRKAR2B
Docosahexaenoic Acid (DHA) Signaling	1.48		0.0455	CYCS,GSK3A
Molecular Mechanisms of Cancer	1.53		0.0154	CDC42,CYCS,GNB1,GSK3A,ITGA2B,PRKAR2B,RELA
CXCR4 Signaling	1.55		0.0226	CDC42,GNB1,MYL12A,PXN
Fcγ Receptor-mediated Phagocytosis in Macrophages and Monocytes	1.56		0.03	ACTB,CDC42,PXN
IL-1 Signaling	1.57		0.0303	GNB1,PRKAR2B,RELA
Androgen Signaling	1.58		0.0233	DNAJB1,GNB1,PRKAR2B,RELA
MIF-mediated Glucocorticoid Regulation	1.6		0.0526	MIF,RELA
Death Receptor Signaling	1.61		0.0312	ACTB,CYCS,RELA
TWEAK Signaling	1.62		0.0541	CYCS,RELA
Actin Cytoskeleton Signaling	1.63	0	0.0201	ACTB,CDC42,ITGA2B,MYL12A,PXN
Actin Nucleation by ARP-WASP Complex	1.64		0.0323	CDC42,ITGA2B,WIPF1
Cellular Effects of Sildenafil (Viagra)	1.66		0.0245	ACTB,MYL12A,PDE4D,PRKAR2B
Xenobiotic Metabolism AHR Signaling Pathway	1.71		0.0341	GSTO1,HSP90B1,RELA
Vitamin-C Transport	1.71		0.0606	GLRX,GSTO1
Semaphorin Neuronal Repulsive Signaling Pathway	1.75		0.0261	ITGA2B,MYL12A,PDE4D,PRKAR2B
EIF2 Signaling	1.78		0.022	ACTB,EIF3I,HSPA5,PABPC1,RPL7
RHOGDI Signaling	1.83		0.0226	ACTB,CDC42,GNB1,ITGA2B,MYL12A
P2Y Purigenic Receptor Signaling Pathway	1.85		0.028	GNB1,ITGA2B,PRKAR2B,RELA
Hypoxia Signaling in the Cardiovascular System	1.87		0.0395	HSP90B1,P4HB,UBE2I
Ephrin B Signaling	1.91		0.0405	CDC42,GNB1,PXN
Role of PKR in Interferon Induction and Antiviral Response	1.91	0	0.0292	CYCS,HSP90B1,HSPA5,RELA
Gα12/13 Signaling	1.94	-1	0.0299	CDC42,MYL12A,PXN,RELA
Agrin Interactions at Neuromuscular Junction	1.95		0.0423	ACTB,CDC42,PXN
PI3K/AKT Signaling	1.97	-2	0.0245	GSK3A,HSP90B1,ILK,ITGA2B,RELA
Leukocyte Extravasation Signaling	2.01	0.447214	0.0251	ACTB,CDC42,MMP25,PXN,WIPF1
GNRH Signaling	2.02	-0.447214	0.0253	CDC42,GNB1,PRKAR2B,PXN,RELA
Endoplasmic Reticulum Stress Pathway	2.09		0.0952	HSP90B1,HSPA5
Axonal Guidance Signaling	2.18		0.0175	CDC42,GNB1,ITGA2B,MMP25,MYL12A,PRKAR2B,PXN,TUBB1,WIPF1
Virus Entry via Endocytic Pathways	2.24		0.0364	ACTB,B2M,CD55,CDC42
Synaptogenesis Signaling Pathway	2.26	-0.816497	0.0215	APOE,CDC42,NAP1L4,NAPA,PRKAR2B,RAB5B,THBS1
Paxillin Signaling	2.26		0.037	ACTB,CDC42,ITGA2B,PXN
TNFR1 Signaling	2.33		0.0577	CDC42,CYCS,RELA
NRF2-mediated Oxidative Stress Response	2.34		0.0253	ACTB,DNAJB1,ERP29,GSTO1,HSP90B1,PPIB
Relaxin Signaling	2.35		0.0303	GNB1,MPPE1,PDE4D,PRKAR2B,RELA
Inhibition of ARE-Mediated mRNA Degradation Pathway	2.39		0.0311	PRKAR2B,PSMA2,PSMC6,PSMD2,PSMD6
HER-2 Signaling in Breast Cancer	2.42	0	0.0263	CDC42,COX6B1,FCER1G,GSK3A,MT-CO2,RELA
PTEN Signaling	2.5	1	0.0329	CDC42,GSK3A,ILK,ITGA2B,RELA
Ephrin Receptor Signaling	2.63	-1.34164	0.0291	CDC42,GNB1,ITGA2B,PXN,SH2D3C,WIPF1
Ascorbate Recycling (Cytosolic)	2.65		0.182	GLRX,GSTO1
ILK Signaling	2.68	-0.447214	0.0297	ACTB,CDC42,GSK3A,ILK,PXN,RELA
Clathrin-mediated Endocytosis Signaling	2.74		0.0306	ACTB,APOE,CDC42,DNM3,RAB5B,SH3KBP1
Protein Kinase A Signaling	2.75	0.377964	0.0214	GNB1,GSK3A,MPPE1,MYL12A,PDE4D,PGP,PRKAR2B,PXN,RELA
Mitochondrial Dysfunction	2.83		0.0319	ATP5F1C,ATP5PO,COX6B1,CYCS,MT-CO2,UQCRC1
RHOA Signaling	2.85	-1.34164	0.0397	ACTB,MYL12A,SEPTIN2,SEPTIN7,SEPTIN9
PAK Signaling	2.95		0.0417	ARHGAP10,CDC42,ITGA2B,MYL12A,PXN
Tight Junction Signaling	2.96		0.0337	ACTB,CDC42,NAPA,NUDT21,PRKAR2B,RELA
Regulation of Actin-based Motility by Rho	2.98	0	0.0424	ACTB,CDC42,ITGA2B,MYL12A,WIPF1
Aldosterone Signaling in Epithelial Cells	3.01		0.0345	AHCY,DNAJB1,HSP90B1,HSPA5,HSPD1,HSPE1
Phagosome Maturation	3.11		0.0361	ATP6AP1,B2M,CTSZ,NAPA,RAB5B,TUBB1
FAT10 Signaling Pathway	3.23		0.0678	PSMA2,PSMC6,PSMD2,PSMD6
CSDE1 Signaling Pathway	3.32	-2	0.0714	HNRNPC,HNRNPD,PABPC1,SYNCRIP
Estrogen Receptor Signaling	3.41	-1.66667	0.0242	ATP5F1C,GNB1,GSK3A,HNRNPD,HSP90B1,MCU,MMP25,MYL12A,PRKAR2B,RELA
Natural Killer Cell Signaling	3.41	-0.377964	0.0343	B2M,CDC42,FCER1G,HSPA5,PXN,RELA,WIPF1
Unfolded protein response	3.52	-2	0.0556	DNAJB1,HSP90B1,HSPA5,P4HB,PDIA6
Caveolar-mediated Endocytosis Signaling	3.83		0.0649	ACTB,B2M,CD55,ITGA2B,RAB5B
Germ Cell-Sertoli Cell Junction Signaling	3.83		0.0402	ACTB,CDC42,ILK,PXN,RAB8B,TUBB1,ZYX
Oxidative Phosphorylation	3.85	-1.63299	0.0496	ATP5F1C,ATP5PO,COX6B1,CYCS,MT-CO2,UQCRC1
Integrin Signaling	4.09	-1.13389	0.0374	ACTB,CDC42,ILK,ITGA2B,MYL12A,PXN,WIPF1,ZYX
Sertoli Cell-Sertoli Cell Junction Signaling	4.09		0.0374	ACTB,CDC42,GSK3A,ILK,ITGA2B,PRKAR2B,RAB8B,TUBB1
BAG2 Signaling Pathway	4.68		0.0698	HSPA5,PSMA2,PSMC6,PSMD2,PSMD6,RELA
Signaling by Rho Family GTPases	4.94	-0.707107	0.037	ACTB,CDC42,GNB1,ITGA2B,MYL12A,RELA,SEPTIN2,SEPTIN7,SEPTIN9,WIPF1
Remodeling of Epithelial Adherens Junctions	5.27		0.0882	ACTB,DNM3,MAPRE2,RAB5B,TUBB1,ZYX
Huntington's Disease Signaling	5.5		0.0381	ATP5F1C,CYCS,DNAJB1,DNM3,GNB1,HSPA5,NAPA,PSMA2,PSMC6,PSMD2,PSMD6
Protein Ubiquitination Pathway	6.51		0.043	B2M,DNAJB1,HSP90B1,HSPA5,HSPD1,HSPE1,PSMA2,PSMC6,PSMD2,PSMD6,UBE2I,USO1
Upstream Regulators for My Projects->eqGranulocytes_IL8
Analysis	ID	Upstream Regulator	Expr Fold Change	Molecule Type	Predicted Activation State	Activation z-score	Notes	Bias Term	Bias-corrected z-score	p-value of overlap	Target molecules in dataset	Mechanistic Network
eqGranulocytes_IL8		SFLLRN (PAR1-activator)		chemical reagent		0.272		0.014	0.231	1.41e-12	ACTB,CD55,ERP29,HSPA5,HSPD1,ILK,PEBP1,PLEK,TAGLN2
eqGranulocytes_IL8		MAPT		other						1.72e-10	ACTB,ATP5F1C,CD9,Cryzl2,CTSZ,CYCS,DBI,HINT1,HSPA5,HSPD1,HSPE1,HUWE1,MT-CO2,NAPA,PEBP1,PPIA,PSMD2,SEPTIN7,SEPTIN9,SLC16A3,THBS1	APP,MAPT,TP53
eqGranulocytes_IL8		TP53		transcription regulator		-0.269		-0.056	0.037	4.33e-09	ACTB,AHCY,ALDOC,APOE,ATP1A1,ATP5F1C,CNN3,DBI,FABP3,FABP5,FKBP4,FUBP1,GLRX,GSK3A,HNRNPA2B1,HSPA5,HSPD1,ILK,ITGA2B,LASP1,LTB4R,MAPRE2,MT-CO2,NAP1L4,P4HB,PDIA6,PSMA2,PSMD2,RAB11FIP1,RAB8A,RBM3,RELA,RPL7,TAGLN2,THBS1,UQCRC1,USO1,ZYX	HIF1A,IFNG,IL1B,MYCN,NFKB1,NR3C1,POU2F1,PPARA,RELA,SP1,SREBF1,TNF,TP53,cholesterol
eqGranulocytes_IL8		CD3		complex	Inhibited	-2.63	bias	-0.347	-1.311	1.51e-08	ATP5F1C,CYCS,FCER1G,FKBP2,HINT1,HNRNPA2B1,HSP90B1,HSPA5,HSPE1,HUWE1,MMRN1,P4HB,PDE4D,PLEK,RAB8A,RBM3,SF1,THBS1,TUBB1,VPS4B
eqGranulocytes_IL8		PSEN1		peptidase		0.816		0.039	0.721	2.66e-08	ACTB,APOE,ATP5F1C,CD9,CTSZ,CYCS,DBI,DHRS7,GNB1,HINT1,HSPA5,HSPD1,HSPE1,PEBP1,PPIA,RBM3	APP,PSEN1,TP53
eqGranulocytes_IL8		APP		other		-1.184		-0.167	-0.789	1.15e-07	ACTB,ALDOC,APOE,ATP5F1C,CDC42,CYCS,DBI,FABP3,GNB1,GSK3A,HINT1,HSPA5,HSPD1,HSPE1,ILK,MT-CO2,OLR1,PEBP1,PPIA,RBM3,RELA,RNASEL,SEPTIN7,SET	APP,HIF1A,Insulin,MYCN,NFKB1,NR3C1,PPARA,RELA,TNF,TP53,XBP1
eqGranulocytes_IL8		XBP1		transcription regulator	Inhibited	-3.101	bias	-0.337	-1.978	1.36e-07	ERP29,ERP44,FKBP2,HSP90B1,HSPA5,P4HB,PCYT1A,PDIA6,PPIB,RELA,SEC23A,USO1	HIF1A,Insulin,NFE2L2,PPARA,XBP1
eqGranulocytes_IL8		Insulin		group		-1.342		-0.153	-0.7	2.09e-07	ACTB,APOE,ATP1A1,CCT5,CYCS,DBI,ERP29,FABP3,FKBP2,GSK3A,HSP90B1,HSPA5,HSPE1,MIF,P4HB,PLIN3,PPIA,PPIB,THBS1,UQCRC1	APP,D-glucose,EGFR,HIF1A,IL1B,Insulin,MYC,NFE2L2,NR3C1,POU2F1,PPARA,RELA,SREBF1,TP53,XBP1
eqGranulocytes_IL8		TGFB1		growth factor	Inhibited	-3.494		-0.138	-2.773	2.31e-07	APOE,B2M,CBFB,CCT5,CD55,CD9,CNN3,CORO1C,EIF4H,FABP5,FCER1G,FKBP2,FUBP1,HINT1,HNRNPC,HNRNPH1,HSP90B1,HSPA5,ILK,LASP1,MYL12A,NRBP1,OLR1,PDE4D,PXN,RBM3,RELA,SLC16A3,SRI,THBS1,TMOD3,USO1,VAPB,VWF,ZYX	HIF1A,IL1B,NFKB1,NR3C1,POU2F1,PPARA,RELA,TGFB1
eqGranulocytes_IL8		Z-LLL-CHO		chemical - protease inhibitor		-1.094	bias	-0.258	-0.155	2.44e-07	ACTB,ATP1A1,FKBP4,HNRNPA2B1,HSP90B1,HSPA5,HSPD1,PEBP1,PPIA,PSMC6,PSMD2,PSMD6,PXN,THBS1	EGFR,MYC,TP53,Z-LLL-CHO
eqGranulocytes_IL8		tanespimycin		chemical drug		1	bias	0.252	0.245	2.55e-07	CYCS,DNAJB1,HNRNPA2B1,HNRNPC,HNRNPM,HSP90B1,HSPA5,MIF,RBMX
eqGranulocytes_IL8		5-fluorouracil		chemical drug		1.324		0.082	1.02	2.6e-07	ATP5F1C,ATP5PO,CCT3,COX6B1,CYCS,HNRNPA2B1,HNRNPC,HSPE1,MIF,MT-CO2,PSMD2,RBMX,RPL7,THBS1
eqGranulocytes_IL8		Manf		other						3.01e-07	HSP90B1,HSPA5,PDIA6
eqGranulocytes_IL8		mir-122		microrna	Activated	2.121	bias	0.378	1.051	3.97e-07	NUDC,PLIN3,PXN,RBM3,SEPTIN2,SEPTIN9,TNPO2,VPS4B
eqGranulocytes_IL8		lipopolysaccharide		chemical drug		-0.337		-0.246	1.113	5.31e-07	ACTB,ALDOC,APOE,ATP1A1,ATP6AP1,B2M,CD55,CD9,CYCS,DDX17,DNAJB1,ERP44,FABP3,FABP5,FCER1G,FKBP2,GLRX,HSP90B1,HSPA5,LASP1,LTB4R,MIF,MMP25,OLR1,P4HB,PDIA6,PLEK,PPIA,PSMA2,PSMD6,RAB1B,RELA,S100A9,SLC16A3,SRI,TES,THBS1,UBE2I,VWF,ZYX	ESR1,ESR2,HIF1A,IFNG,IL1B,Insulin,MYCN,NFKB1,NR3C1,POU2F1,PPARA,RELA,TNF,TP53,XBP1,beta-estradiol,lipopolysaccharide
eqGranulocytes_IL8		arsenic trioxide		chemical drug	Inhibited	-2.007		-0.034	-1.917	5.94e-07	ATP1B3,ATP6AP1,CDC42,COX6B1,ERP29,GLRX,HSP90B1,HSPA5,HSPE1,P4HB,PDIA6,RAB8A,RELA	NFE2L2,arsenic trioxide
eqGranulocytes_IL8		RICTOR		other		0.653	bias	0.287	-0.338	6.68e-07	ATP5F1C,ATP5PO,ATP6AP1,COX6B1,FABP5,PSMA2,PSMC6,PSMD2,PSMD6,PXN,RPL7,UQCRC1
eqGranulocytes_IL8		geldanamycin		chemical drug		-1.876		0.133	-2.331	6.68e-07	CDC42,DNAJB1,FKBP4,HSP90B1,HSPA5,HSPD1,NUDC,RAB1B,RAB8B,RNASEL,STK4,ZYX
eqGranulocytes_IL8		metribolone		chemical reagent		-0.718	bias	-0.359	0.57	1.26e-06	ALDOC,ATP5F1C,ATP6AP1,B2M,COX6B1,DBI,HSPA5,MIF,MYL12A,PDE4D,PPIA,PPIB,SLC16A3,THBS1,UQCRC1	D-glucose,SREBF1,TP53,metribolone
eqGranulocytes_IL8		CD 437		chemical drug	Activated	2.53	bias	0.386	1.31	1.45e-06	ATP5F1C,ATP5PO,CCT3,EIF3I,HNRNPC,PABPC1,RBMX,SEPTIN7,SET,TMEM14C
eqGranulocytes_IL8		1,2-dithiol-3-thione		chemical reagent	Inhibited	-2.524	bias	-0.351	-1.421	1.65e-06	ATP1A1,CCT3,ERP29,HSP90B1,PDIA6,PPIB,PSMA2,PSMC6,SEC23A,USO1	1,2-dithiol-3-thione,NFE2L2
eqGranulocytes_IL8		dexamethasone		chemical drug		1.204		-0.062	1.526	2.1e-06	ACTB,APOE,ATP1A1,B2M,CD55,CNN3,CYCS,DHRS7,FABP5,FCER1G,FKBP2,FKBP4,HNRNPH1,HSP90B1,HSPA5,KHSRP,LTB4R,MIF,MPPE1,MT-CO2,OLR1,PABPC1,PDE4D,PEBP1,PLEK,PRKAR2B,PSMA2,RELA,RPL7,S100A9,SEPTIN7,SLC44A2,THBS1,TUBB1,UQCRC1,WIPF1	EGFR,HIF1A,IFNG,IL1B,MYC,MYCN,NFKB1,NR3C1,POU2F1,PPARA,RELA,TNF,TP53,dexamethasone
eqGranulocytes_IL8		MYC		transcription regulator	Inhibited	-2.134		-0.198	-1.223	3.42e-06	ACTB,AHCY,CCT3,CD9,COX6B1,CYCS,DBI,FABP5,GLRX5,HNRNPA2B1,HNRNPD,HNRNPH1,HSPD1,HSPE1,MIF,NUDC,NUDT21,OLR1,PPIA,RPL7,SLC16A3,TAGLN2,TES,THBS1,UBE2I
eqGranulocytes_IL8		EDN1		cytokine		-0.97	bias	-0.363	-0.091	4.05e-06	ACTB,CDC42,FABP3,HSPA5,OLR1,PDIA6,PXN,THBS1,TUBB1,VWF	EDN1,ESR1,ESR2,beta-estradiol
eqGranulocytes_IL8		mibolerone		chemical drug	Inhibited	-2.828		-0.16	-2.376	5.08e-06	DBI,ERP29,HSP90B1,HSPA5,P4HB,PPIA,PPIB,USO1
eqGranulocytes_IL8		CD28		transmembrane receptor		-1.514	bias	-0.298	-0.495	6.85e-06	ATP5F1C,CYCS,FCER1G,FKBP2,HINT1,HUWE1,MMRN1,PDE4D,RELA,SLC16A3,THBS1,TUBB1
eqGranulocytes_IL8		HRAS		enzyme		1.128		-0.148	1.479	6.95e-06	ACTB,B2M,CTSZ,EIF3I,ERP29,FABP3,GNB1,HNRNPA2B1,ILK,LASP1,MYL12A,NUCKS1,P4HB,PCYT1A,PXN,RELA,THBS1
eqGranulocytes_IL8		IGF1R		transmembrane receptor	Inhibited	-2.177	bias	-0.317	-1.486	9.13e-06	ATP5PO,CBFB,CDC42,CYCS,HSPA5,LASP1,PSMC6,RBM3,RELA,RPL7,UQCRC1
eqGranulocytes_IL8		lactacystin		chemical - protease inhibitor		-0.426		-0.194	0.152	9.86e-06	ACTB,ATP1A1,CD9,HNRNPA2B1,HSP90B1,HSPA5,PEBP1,PPIA,PXN	EGFR,MYC,lactacystin
eqGranulocytes_IL8		uranyl nitrate		chemical toxicant		-1.134		-0.052	-0.997	9.94e-06	CYCS,GLRX3,HNRNPA2B1,HSPD1,PEBP1,RPL7,TAGLN2
eqGranulocytes_IL8		UQCC3		other						1.07e-05	ALDOC,ATP1A1,ATP1B3,ATP5F1C,ATP5PO,ATP6AP1,COX6B1,UQCRC1
eqGranulocytes_IL8		NFU1		other						1.15e-05	ATP5F1C,ATP5PO,CYCS,MT-CO2,UQCRC1
eqGranulocytes_IL8		2-amino-1-methyl-6-phenylimidazo-4-5-b-pyridine		chemical toxicant	Inhibited	-2.236	bias	-0.383	-1.38	1.29e-05	CCT5,HSPA5,HSPD1,HSPE1,PSMA2
eqGranulocytes_IL8		ESR1		ligand-dependent nuclear receptor		-1.099		-0.059	-0.847	1.41e-05	APOE,CD55,CDC42,DDX17,DSC1,FKBP2,FKBP4,GLRX,GNB1,HNRNPD,HSP90B1,HSPD1,ITGA2B,LTB4R,OLR1,PGLS,RAB5B,RELA,S100A9,SAMD9,SLC16A3,SLC44A2,STK4,TMOD3,UBE2I	ESR1,ESR2,beta-estradiol
eqGranulocytes_IL8		mir-1		microrna		1.664	bias	0.397	0.699	1.66e-05	CNN3,HSP90B1,HSPD1,LASP1,MCU,PPIB,TAGLN2
eqGranulocytes_IL8		UBA1	1.294	enzyme		1.964	bias	0.355	1.267	1.91e-05	APOE,HSP90B1,HSPA5,TAGLN2
eqGranulocytes_IL8		APOE	-23.746	transporter						2.04e-05	ACTB,APOE,DBI,FABP5,FKBP4,HSP90B1,HSPA5,HSPD1,P4HB,RELA,S100A9,ZYX	APOE,HIF1A,IFNG,IL1B,MYCN,NFKB1,NR3C1,POU2F1,PPARA,RELA,SREBF1,TCR,TNF,TP53,cholesterol
eqGranulocytes_IL8		PAX3-FOXO1		fusion gene/product		0.632		0.03	0.537	2.44e-05	AHCY,ATP1A1,CCT5,CORO1C,DBI,FABP5,ILK,NONO,P4HB,SRI
eqGranulocytes_IL8		ANGPT2		growth factor		-1.667	bias	-0.35	-0.617	2.49e-05	FKBP2,FKBP4,HSPA5,HSPD1,MIF,OLR1,P4HB,PDIA6,THBS1	ANGPT2,HIF1A,IL1B,MYCN,NFKB1,NR3C1,POU2F1,PPARA,RELA,TNF,TP53
eqGranulocytes_IL8		imatinib		chemical drug						2.52e-05	ATP1B3,ATP6AP1,CDC42,COX6B1,ERP29,HSP90B1,HSPA5,HSPE1,P4HB,PDIA6,RAB8A
eqGranulocytes_IL8		HIF1A		transcription regulator		-1.157		-0.245	-0.27	3.05e-05	ALDOC,APOE,ATP5PO,HSPA5,HUWE1,ITGA2B,MIF,NUCKS1,PPIA,PRKAR2B,RELA,SLC16A3,THBS1,UQCRC1	HIF1A,IL1B,NR3C1,POU2F1,PPARA,RELA,SP1
eqGranulocytes_IL8		IL5		cytokine		-1.117	bias	-0.45	0.301	3.28e-05	ALDOC,CD55,CD9,HSP90B1,HSPA5,PDIA6,RBM3,SLC16A3,SRI,ZYX
eqGranulocytes_IL8		KLF3		transcription regulator		0.302		0.146	-0.183	3.52e-05	APOE,APRT,CBFB,CCT3,CD55,DHRS7,HNRNPH1,MIF,RELA,TES,TMOD3
eqGranulocytes_IL8		CETP		enzyme		-1.131		0.101	-1.332	3.6e-05	APOE,HSPA5,P4HB,PLIN3	CETP,HIF1A,Insulin,PPARA,XBP1
eqGranulocytes_IL8		HSF1		transcription regulator		-0.456		-0.142	-0.07	4.38e-05	B2M,CCT3,CCT5,DNAJB1,FKBP4,HNRNPA2B1,HSPD1,HSPE1,RELA
eqGranulocytes_IL8		Pln		other						4.51e-05	ACTB,ATP1A1,FABP3,HSP90B1,RAB5B
eqGranulocytes_IL8		desmopressin		biologic drug						4.55e-05	ACTB,ATP1A1,HINT1,PPIA,PXN,VWF
eqGranulocytes_IL8		rosiglitazone		chemical drug		-0.11		-0.143	0.39	5.19e-05	APOE,ATP1A1,CYCS,ERP44,FABP3,FABP5,HSPA5,ILK,LTB4R,OLR1,S100A9,THBS1,UQCRC1	HIF1A,IL1B,Insulin,MYCN,NFKB1,NR3C1,POU2F1,PPARA,RELA,SREBF1,TNF,TP53,XBP1,cholesterol,rosiglitazone
eqGranulocytes_IL8		VCP	-1.364	enzyme						5.45e-05	HSPA5,P4HB,PPIB,SYNE2
eqGranulocytes_IL8		D-glucose		chemical - endogenous mammalian		-1.321		-0.157	-0.71	5.91e-05	ACTB,ALDOC,CD55,DBI,FABP5,FKBP2,HSPA5,HSPD1,ILK,MIF,PDIA6,PLIN3,PPIB,RELA,TAGLN2,THBS1,USO1	D-glucose,HIF1A,IL1B,Insulin,MYCN,NFKB1,NR3C1,POU2F1,PPARA,RELA,SREBF1,SREBF2,TNF,TP53,XBP1
eqGranulocytes_IL8		EGFR		kinase	Inhibited	-3.151		-0.23	-2.295	6.18e-05	ACTB,CCT5,HNRNPA2B1,HNRNPD,HNRNPH1,HSP90B1,HSPA5,HSPE1,MPPE1,MT-CO2,NUDC,PABPC1,PPIA,RELA,THBS1	EGFR,HIF1A,Insulin,MYC,PPARA,XBP1
eqGranulocytes_IL8		BHLHE40		transcription regulator		-1.117	bias	-0.283	-0.225	7.39e-05	B2M,CD9,GLRX,HSPA5,LTB4R,OLR1,PSMA2,SLC16A3,SRI,TES	BHLHE40,HIF1A,IFNG,NR3C1,TP53
eqGranulocytes_IL8		ERN1		kinase		-1.919	bias	-0.251	-1.436	7.65e-05	ERP44,HSP90B1,HSPA5,P4HB,PDIA6,TBCB,USO1	ERN1,NFE2L2,XBP1
eqGranulocytes_IL8		PLN		transporter						7.83e-05	ACTB,ATP1A1,FABP3,HSP90B1,RAB5B
eqGranulocytes_IL8		CREB3L2		transcription regulator						8.2e-05	HSPA5,SEC23A,USO1
eqGranulocytes_IL8		tributyrin		chemical drug		-0.277	bias	-0.443	0.707	8.42e-05	CD55,HNRNPD,HSPA5,MYL12A,OLR1
eqGranulocytes_IL8		KITLG		growth factor						9e-05	ACTB,B2M,FABP5,ITGA2B,PGLS,RPL7,SLC44A2,TUBB1,VWF
eqGranulocytes_IL8		bortezomib		chemical drug	Inhibited	-2.132		-0.058	-1.973	9.26e-05	DNAJB1,HSP90B1,HSPA5,HSPE1,PSMA2,PSMC6,PSMD2,PSMD6,VAPB
eqGranulocytes_IL8		CGA		other		1.633		-0.009	1.656	9.32e-05	FKBP2,FKBP4,HSP90B1,HSPA5,PDIA6,PPIB
eqGranulocytes_IL8		puromycin aminonucleoside		chemical reagent		-0.816		-0.21	-0.302	0.000103	ACTB,CDC42,HSPA5,HSPD1,RBM3,TES
eqGranulocytes_IL8		TEAD1		transcription regulator	Inhibited	-2.646	bias	-0.418	-1.539	0.00011	ATP5F1C,ATP5PO,CYCS,FABP3,GSK3A,THBS1,UQCRC1
eqGranulocytes_IL8		NRF1		transcription regulator		-1.342	bias	-0.269	-0.74	0.000119	ATP1A1,COX6B1,CYCS,PSMC6,PSMD6
eqGranulocytes_IL8		PSEN2		peptidase		0.447		0.05	0.335	0.00012	ACTB,CD9,CTSZ,DHRS7,GNB1,MT-CO2
eqGranulocytes_IL8		monorden		chemical - endogenous non-mammalian						0.000129	DNAJB1,HSP90B1,HSPA5
eqGranulocytes_IL8		GIMAP1-GIMAP5		other						0.000135	HSP90B1,HSPD1
eqGranulocytes_IL8		PDIA6	-1.854	enzyme						0.000135	HSP90B1,HSPA5
eqGranulocytes_IL8		SEPTIN5	-2.815	enzyme						0.000135	SEPTIN2,SEPTIN7
eqGranulocytes_IL8		methylprednisolone		chemical drug		-1.087		-0.008	-1.061	0.000138	AHCY,ATP1A1,ATP5F1C,B2M,CD9,CNN3,CYCS,FABP5,FKBP4,HSP90B1,PCYT1A,RAB8A,SRI,ZYX
eqGranulocytes_IL8		tetraethylammonium		chemical drug		1.067		0.104	0.862	0.000166	GSTO1,HNRNPC,SRI,TBCB
eqGranulocytes_IL8		tunicamycin		chemical - endogenous non-mammalian	Inhibited	-2.717		-0.243	-2.058	0.000181	AVIL,HSP90B1,HSPA5,ILK,NAPA,P4HB,PDIA6,TBCB,USO1	CREB3L1,CREB3L2,ERN1,NFE2L2,XBP1,tunicamycin
eqGranulocytes_IL8		Lh		complex	Activated	2.236	bias	-0.274	2.849	0.000183	ACTB,CD55,GNB1,ILK,MAPRE2,PDE4D,PLIN3,RPL7,SLC16A3,THBS1
eqGranulocytes_IL8		mannose		chemical - endogenous mammalian						0.000191	HSP90B1,HSPA5,THBS1	EGFR,HIF1A,Insulin,MYC,MYCN,NFKB1,NR3C1,PPARA,RELA,TNF,TP53,XBP1,mannose
eqGranulocytes_IL8		GABA		chemical - endogenous mammalian		0.302	bias	0.416	-1.079	0.000192	ACTB,APOE,ATP1A1,ATP6AP1,GNB1,HNRNPC,HNRNPM,HSPA5,PDIA6,RAB5B,RPL7
eqGranulocytes_IL8		KAT2A		enzyme		-1.633		-0.214	-1.108	0.000199	FABP5,HNRNPA2B1,HNRNPD,HSPA5,HSPD1,NUDC	KAT2A,MYC
eqGranulocytes_IL8		LONP1		peptidase						0.000236	HNRNPA2B1,HSPD1,HSPE1,MT-CO2,P4HB
eqGranulocytes_IL8		HTT		transcription regulator						0.000237	ALDOC,APOE,ATP1A1,ATP5PO,B2M,CD9,CYCS,DNAJB1,FKBP4,HSPA5,HSPD1,HSPE1,HUWE1,RELA,VAPB	APP,HTT,TP53
eqGranulocytes_IL8		EPO		cytokine						0.000274	ACTB,B2M,CTSZ,FABP5,RELA,RPL7,SLC44A2,TUBB1,VWF	EPO,MYCN,NFKB1,NR3C1,RELA,TNF,TP53
eqGranulocytes_IL8		cadmium		chemical toxicant		-1.411		-0.199	-0.98	0.000279	ATP1A1,B2M,HSPA5,ILK,PSMD6
eqGranulocytes_IL8		mycophenolic acid		chemical drug		-0.277	bias	-0.293	0.372	0.000294	CD55,HNRNPD,HSPA5,MYL12A,OLR1
eqGranulocytes_IL8		Fus		transcription regulator		1.131		-0.213	1.553	0.000308	HNRNPH1,HSP90B1,HSPA5,SLC44A2
eqGranulocytes_IL8		TCR		complex		-1.584	bias	-0.305	-0.679	0.000345	APOE,HSP90B1,HSPA5,HSPD1,P4HB,PXN,RELA,RPL7,SYNCRIP,UQCRC1	MYCN,NFKB1,NR3C1,RELA,TCR,TNF,TP53
eqGranulocytes_IL8		miR-1-3p (and other miRNAs w/seed GGAAUGU)		mature microrna	Activated	2.596	bias	0.473	1.368	0.000347	CNN3,CORO1C,DNAJB1,LASP1,PPIB,TAGLN2,THBS1
eqGranulocytes_IL8		Collagen(s)		complex						0.000361	ACTB,CD55,PXN,THBS1
eqGranulocytes_IL8		cholesterol		chemical - endogenous mammalian		-0.816		-0.173	-0.393	0.0004	APOE,DBI,FABP3,FABP5,HNRNPD,HSP90B1,HSPA5,THBS1	HIF1A,IL1B,Insulin,MYCN,NFKB1,NR3C1,POU2F1,PPARA,PRNP,RELA,SREBF1,SREBF2,TNF,TP53,XBP1,cholesterol
eqGranulocytes_IL8		cis-urocanic acid		chemical drug						0.000422	CD55,GLRX,TMOD3
eqGranulocytes_IL8		GSK-2606414		chemical reagent						0.000446	HSPA5,P4HB
eqGranulocytes_IL8		ampelopsin		chemical drug						0.000446	HSPA5,RELA
eqGranulocytes_IL8		ouabain		chemical drug		-0.832		-0.158	-0.526	0.000452	ACTB,ATP1A1,CDC42,HSPA5
eqGranulocytes_IL8		trichostatin A		chemical drug		-0.042		-0.1	0.329	0.000459	ACTB,APOE,AVIL,B2M,CD9,DNM3,FUBP1,GLRX,HNRNPA2B1,HNRNPD,HSPA5,NUCKS1,PCYT1A,RELA,SRI,THBS1,VWF	ESR2,SP1,trichostatin A
eqGranulocytes_IL8		SYVN1		transporter		0.816	bias	-0.414	1.831	0.000462	ATP1A1,ATP1B3,ATP6AP1,HNRNPM,NUDT21,OLR1
eqGranulocytes_IL8		PC-SPES		chemical drug						0.000564	B2M,CD9,DNAJB1,HSPA5,P4HB
eqGranulocytes_IL8		NFE2L2		transcription regulator		-1.599	bias	-0.267	-0.72	0.00058	ATP1A1,CCT3,ERP29,GSTO1,HSP90B1,MT-CO2,PDIA6,PPIB,RELA,SEC23A,USO1
eqGranulocytes_IL8		FUS		transcription regulator						0.000597	HSP90B1,HSPA5,HSPD1,SLC44A2
eqGranulocytes_IL8		FOLR1		transporter						0.000646	ALDOC,CD9,GLRX,SYNCRIP,TAGLN2
eqGranulocytes_IL8		elaidic acid		chemical - endogenous mammalian		-1.342	bias	-0.371	-0.512	0.000646	ACOT1,APOE,CD9,DBI,FABP5
eqGranulocytes_IL8		CSF1		cytokine		-1.067	bias	-0.306	-0.327	0.000666	APOE,CD9,FCER1G,HSP90B1,HSPA5,RAB5B,SLC16A3,THBS1	CSF1,MYCN,NFKB1,NR3C1,RELA,TNF,TP53
eqGranulocytes_IL8		HSP90B1	-1.508	other		1	bias	-0.39	1.78	0.000772	CDC42,HSP90B1,HSPA5,RAB8B
eqGranulocytes_IL8		NR3C1		ligand-dependent nuclear receptor						0.000783	ACTB,APOE,ATP6AP1,B2M,CORO1C,DBI,DPP7,FCER1G,FKBP4,OLR1,RELA,S100A9,SH3KBP1,THBS1	HIF1A,IFNG,MYCN,NFKB1,NR3C1,PPARA,RELA,SP1,TNF,TP53,dexamethasone
eqGranulocytes_IL8		SNAI1		transcription regulator						0.0008	CD55,CDC42,LASP1,PEBP1,TMOD3,WIPF1
eqGranulocytes_IL8		ST1926		chemical drug		0.816	bias	0.45	-0.285	0.000853	ACTB,CCT3,EIF3I,PABPC1,SEPTIN7,TMEM14C
eqGranulocytes_IL8		IND S7		chemical - kinase inhibitor						0.000872	ACTB,ERP29,KHSRP
eqGranulocytes_IL8		PHIP		other						0.000929	PXN,ZYX
eqGranulocytes_IL8		UDP-D-glucose		chemical - endogenous mammalian						0.000929	HSP90B1,HSPA5
eqGranulocytes_IL8		VIPAS39		other						0.000929	THBS1,VWF
eqGranulocytes_IL8		BCR (complex)		complex	Inhibited	-2.449	bias	-0.403	-1.463	0.000952	COX6B1,HNRNPA2B1,HSP90B1,HSPA5,HSPD1,HSPE1,PLEK,RELA,TES
eqGranulocytes_IL8		F2		peptidase		-1.731	bias	-0.418	-0.595	0.000953	CD55,CORO1C,ERP29,MIF,RELA,TAGLN2,THBS1,VWF
eqGranulocytes_IL8		MEL S3		chemical - kinase inhibitor						0.000968	ACTB,ERP29,KHSRP
eqGranulocytes_IL8		PRKAG3		kinase						0.000968	CD55,GLRX,HSPA5,PLIN3,SH3KBP1,SLC44A2
eqGranulocytes_IL8		DDX5	-1.429	enzyme		-1	bias	-0.423	-0.153	0.000981	ATP5F1C,CYCS,MT-CO2,UQCRC1
eqGranulocytes_IL8		SREBF1		transcription regulator		-1.937	bias	-0.327	-1.097	0.00102	ALDOC,CYCS,DBI,FABP3,FABP5,HSPA5,MT-CO2,PCYT1A	D-glucose,SREBF1,SREBF2,TP53
eqGranulocytes_IL8		IL4		cytokine		-0.362	bias	-0.271	0.631	0.00102	ACTB,ALDOC,APOE,APRT,CBFB,CCT3,CD55,DSC1,FCER1G,HNRNPH3,LTB4R,PSMA2,RELA,S100A9,SLC16A3,STK4,TES,UQCRC1,USO1	HIF1A,IFNG,IL4,MYCN,NFKB1,NR3C1,RELA,TNF,TP53
eqGranulocytes_IL8		MTOR		kinase		0.308		-0.129	0.693	0.00103	AVIL,CYCS,FABP5,HSP90B1,PGP,PPIB,PRKAR2B,RELA,SLC16A3
eqGranulocytes_IL8		SOD1	-2.326	enzyme						0.00104	ACTB,ALDOC,APOE,ATP1A1,B2M,GNB1,RBM3,VAPB
eqGranulocytes_IL8		IFNG		cytokine		-0.286		-0.201	0.528	0.00112	ACTB,AHCY,ATP1A1,B2M,CD55,CTSZ,FABP5,FCER1G,HSPA5,HSPD1,LTB4R,MIF,MMP25,PLEK,PPIA,PSMA2,RELA,S100A9,SAMD9,SLC16A3,THBS1,ZYX	D-glucose,HIF1A,IFNG,IL1B,MYCN,NFKB1,NR3C1,POU2F1,PPARA,RELA,SP1,SREBF1,TNF,TP53
eqGranulocytes_IL8		chrysotile asbestos		chemical toxicant						0.00118	CTSZ,HSP90B1,HSPA5
eqGranulocytes_IL8		GPX5		enzyme						0.00123	ERP44,PDIA6
eqGranulocytes_IL8		dihematoporphyrin ether		chemical drug						0.00123	HSP90B1,HSPD1
eqGranulocytes_IL8		budesonide		chemical drug		-0.707		0.185	-1.23	0.00125	AHCY,ARHGAP10,B2M,CNN3,PDIA6,RAB5B,S100A9,TMOD3
eqGranulocytes_IL8		Ubiquitin		group						0.00129	HSP90B1,HSPA5,HSPD1
eqGranulocytes_IL8		pirinixic acid		chemical toxicant		-1.706	bias	-0.28	-0.871	0.00136	ALDOC,APOE,CCT3,DBI,FABP5,FCER1G,HSPD1,HSPE1,PSMA2,PSMC6	MYCN,NFKB1,NR3C1,RELA,TNF,TP53,pirinixic acid
eqGranulocytes_IL8		GRN	2.433	growth factor						0.00139	APOE,B2M,CD9,CTSZ,OLR1	GRN,HIF1A,IL1B,MYCN,NFKB1,NR3C1,POU2F1,PPARA,RELA,TNF,TP53
eqGranulocytes_IL8		IL15		cytokine		-0.492	bias	-0.272	0.11	0.0014	ALDOC,CD55,HNRNPA2B1,HSPE1,MIF,PLEK,RAB8A,SET,SF1,SLC16A3
eqGranulocytes_IL8		Pro-inflammatory Cytokine		group						0.00144	APOE,CD55,HSPA5,OLR1
eqGranulocytes_IL8		miR-9-5p (and other miRNAs w/seed CUUUGGU)		mature microrna	Activated	2	bias	0.473	1.054	0.00144	ALDOC,ATP5F1C,ATP5PO,UQCRC1
eqGranulocytes_IL8		INSIG1		other		-0.447	bias	0.376	-1.288	0.0015	APOE,FABP5,HSPA5,OLR1,S100A9	INSIG1,SREBF1,cholesterol
eqGranulocytes_IL8		5-azacytidine		chemical drug		-1.664	bias	-0.305	-0.921	0.0015	GSK3A,HSP90B1,HSPA5,HSPD1,THBS1,ZYX
eqGranulocytes_IL8		APOA1	-1.279	transporter						0.00151	APOE,CDC42,HSPA5,PCYT1A	APOA1,MYCN,NFKB1,NR3C1,RELA,TNF,TP53
eqGranulocytes_IL8		AKT3		kinase						0.00155	HSPD1,HSPE1,MT-CO2
eqGranulocytes_IL8		interferon beta-1a		biologic drug						0.00155	DNAJB1,FCER1G,PPIA,S100A9,TBCB
eqGranulocytes_IL8		cycloheximide		chemical reagent		0.431		0.072	0.23	0.00163	ACTB,B2M,CD55,MT-CO2,OLR1,PRKAR2B,PXN,RBM3,THBS1	HIF1A,IL1B,MYCN,NFKB1,NR3C1,POU2F1,PPARA,RELA,TNF,TP53,cycloheximide
eqGranulocytes_IL8		simvastatin		chemical drug		0.708		0.115	0.433	0.0017	APOE,CD55,CD9,NONO,OLR1,RELA,VWF	HIF1A,IL1B,NFKB1,NR3C1,POU2F1,PPARA,RELA,simvastatin
eqGranulocytes_IL8		MRTFA		transcription regulator		0.152		-0.119	0.389	0.00173	ACTB,CBFB,FABP3,S100A9,THBS1,TUBB1
eqGranulocytes_IL8		TNF		cytokine		0.134		-0.173	0.963	0.00174	ACTB,APOE,ATP1A1,B2M,CD55,CDC42,CTSZ,DBI,FABP5,FCER1G,HSP90B1,HSPA5,HSPD1,LTB4R,MIF,MT-CO2,OLR1,P4HB,PCYT1A,PSMA2,RELA,S100A9,SAMD9,SYTL1,THBS1,ZYX	ESR1,ESR2,HIF1A,IFNG,IL1B,NFKB1,NR3C1,POU2F1,PPARA,RELA,TNF,TP53,beta-estradiol
eqGranulocytes_IL8		cyclosporin A		biologic drug		-0.902		0.132	-1.313	0.00174	APOE,ATP1A1,CD55,HSPA5,HSPD1,MIF,PPIA,RBM3,S100A9,VPS4B	HIF1A,IFNG,Insulin,MYCN,NFKB1,NR3C1,PPARA,RELA,SP1,TNF,TP53,XBP1,cyclosporin A
eqGranulocytes_IL8		LDLR		transporter						0.00175	APOE,CD55,FABP3,FABP5,HSPA5,MIF,MINPP1,PSMC6	LDLR,MYCN,NFKB1,NR3C1,RELA,SREBF1,SREBF2,TNF,TP53,cholesterol
eqGranulocytes_IL8		RELA	-1.953	transcription regulator	Inhibited	-2.781	bias	-0.326	-1.875	0.00177	APOE,B2M,HSP90B1,MIF,OLR1,PXN,RELA,SH3KBP1,STK4,SYTL1	HIF1A,IL1B,MYCN,NFKB1,NR3C1,POU2F1,PPARA,RELA,SP1,TNF,TP53
eqGranulocytes_IL8		tretinoin		chemical - endogenous mammalian		0.942		-0.162	1.67	0.00179	APOE,ATP1B3,CBFB,CCT5,CD9,CDC42,DBI,DSC1,FABP5,FCER1G,HNRNPC,HNRNPD,HSPD1,ITGA2B,LTB4R,PCYT1A,PLEK,RELA,RPL7,S100A9,THBS1,VWF,WIPF1	GATA2,HIF1A,IFNG,MYCN,NFKB1,NR3C1,RELA,SP1,TNF,TP53,tretinoin
eqGranulocytes_IL8		IRF4		transcription regulator		-0.447		0.059	-0.58	0.00182	B2M,DBI,PPIB,PSMA2,SH3KBP1,STK4
eqGranulocytes_IL8		CRTC3		other						0.00196	CYCS,MT-CO2
eqGranulocytes_IL8		PHF6		transcription regulator						0.00198	HINT1,PEBP1,PPIA
eqGranulocytes_IL8		GnRH analog		biologic drug		-0.788		0.013	-0.824	0.00207	GSTO1,HINT1,PABPC1,PPIA,RAB8A,RELA,SF1,SRI
eqGranulocytes_IL8		ACVRL1		kinase						0.00214	ACTB,PXN,ZYX
eqGranulocytes_IL8		KRT19		other						0.00239	ERP29,HSPA5
eqGranulocytes_IL8		TBC1D1		other						0.00239	FABP5,PLIN3
eqGranulocytes_IL8		taurodeoxycholic acid		chemical - endogenous mammalian						0.00239	HSPA5,OLR1
eqGranulocytes_IL8		ammonium		chemical - endogenous mammalian	Activated	2.449		0.009	2.426	0.00242	AHCY,ATP1A1,HSPE1,MIF,RCSD1,USO1
eqGranulocytes_IL8		KRAS	-1.054	enzyme		0.125		-0.02	0.172	0.00242	ALDOC,B2M,CCT5,EIF3I,HNRNPD,HSPA5,HSPE1,ILK,NUDC,PABPC1,PSMC6,RELA,THBS1,UBE2I	EGFR,KRAS,MYC
eqGranulocytes_IL8		IMMT	1.101	other						0.00248	CD55,MIF,RELA	HIF1A,IL1B,IMMT,NR3C1,POU2F1,PPARA,RELA
eqGranulocytes_IL8		valproic acid		chemical drug		-0.914		-0.017	-0.867	0.00261	DBI,HSPA5,PDIA6,PSMA2,PSMC6,PSMD2,PSMD6,PXN,TES,THBS1
eqGranulocytes_IL8		IgG		complex		0.378		0.095	0.128	0.00262	APOE,ATP1B3,B2M,CD9,FABP5,HSPA5,RELA,THBS1	HIF1A,IFNG,IL1B,IgG,MYCN,NFKB1,NR3C1,POU2F1,PPARA,RELA,TNF,TP53
eqGranulocytes_IL8		FLT1		kinase		0		-0.131	0.262	0.00264	AHCY,GSK3A,THBS1,VWF
eqGranulocytes_IL8		Y 27632		chemical drug		0		0.154	-0.307	0.00264	ACTB,RELA,TAGLN2,THBS1
eqGranulocytes_IL8		MMP11		peptidase						0.00266	HSPD1,HSPE1,SLC16A3
eqGranulocytes_IL8		TLE3		other						0.00276	ATP5F1C,ATP5PO,CYCS,UQCRC1
eqGranulocytes_IL8		linoleic acid		chemical - endogenous mammalian		-1.067		-0.181	-0.709	0.00276	HSP90B1,HSPA5,OLR1,S100A9	HIF1A,IL1B,MYCN,NFKB1,NR3C1,POU2F1,PPARA,RELA,TNF,TP53,linoleic acid
eqGranulocytes_IL8		GPX4		enzyme						0.00285	ERP44,PDIA6
eqGranulocytes_IL8		azetidyl-2-carboxylic acid		chemical reagent						0.00285	HSP90B1,HSPA5
eqGranulocytes_IL8		sapanisertib		chemical drug						0.00285	HNRNPC,PABPC1
eqGranulocytes_IL8		PRNP		other		-1.98		-0.058	-1.864	0.00288	APOE,HSP90B1,HSPA5,RELA	NFKB1,NR3C1,PRNP,RELA,SREBF1,cholesterol
eqGranulocytes_IL8		beta-estradiol		chemical - endogenous mammalian		-1.662		-0.199	-0.716	0.0029	ACTB,APOE,ATP6AP1,CD55,CDC42,CYCS,DDX17,FABP3,FABP5,GNB1,HNRNPD,HSP90B1,HSPA5,HSPD1,MMRN1,MT-CO2,MYL12A,NT5DC2,P4HB,PPIB,PSMA2,PXN,RAB11FIP1,RELA,S100A9,SET,THBS1,UBE2I,VWF,ZYX	APP,ESR1,ESR2,HIF1A,IL1B,MYCN,NFKB1,NR3C1,POU2F1,PPARA,RELA,TNF,TP53,beta-estradiol
eqGranulocytes_IL8		bisphenol A		chemical - endogenous mammalian		0.97		-0.178	1.401	0.00301	ATP5PO,ATP6AP1,HSP90B1,SYNCRIP,THBS1,ZYX
eqGranulocytes_IL8		E2F1		transcription regulator		-0.29	bias	-0.295	0.531	0.00312	CD9,EIF3I,HNRNPD,HSP90B1,HSPD1,HSPE1,ILK,NUDC,PSMD2,THBS1	E2F1,KAT2A,MYC
eqGranulocytes_IL8		NFYA		transcription regulator						0.00312	CDC42,HSPA5,UBE2I,VWF
eqGranulocytes_IL8		filgrastim		biologic drug	Activated	2.333		0.113	1.995	0.00314	ATP1A1,B2M,CD55,FABP5,FCER1G,LTB4R,PDE4D,PRKAR2B,TUBB1
eqGranulocytes_IL8		ADORA2A		g-protein coupled receptor		0.447		-0.089	0.647	0.00335	ALDOC,ATP6AP1,CCT5,NAPA,P4HB
eqGranulocytes_IL8		PLX5622		chemical drug		-1.342	bias	-0.251	-0.78	0.00335	ACTB,B2M,CD9,HSPA5,MIF
eqGranulocytes_IL8		GPAT4		enzyme						0.00336	HSP90B1,HSPA5
eqGranulocytes_IL8		sirolimus		chemical drug		1.599		0.211	0.904	0.00368	ACTB,ATP1A1,ATP5F1C,B2M,COX6B1,CYCS,DPP7,HSP90B1,HSPA5,HSPD1,PPIA,RELA	HIF1A,HTT,IFNG,Insulin,MYCN,NFKB1,NR3C1,PPARA,RELA,TNF,TP53,XBP1,dexamethasone,sirolimus
eqGranulocytes_IL8		IDH2	-1.238	enzyme						0.0037	HINT1,PEBP1,PPIA
eqGranulocytes_IL8		FN1	1.137	enzyme		-1.452	bias	-0.273	-0.853	0.00387	AHCY,APOE,GSK3A,PXN,THBS1,ZYX	FN1,TP53
eqGranulocytes_IL8		HBA1/HBA2		transporter						0.00393	ATP5F1C,ATP5PO,UQCRC1
eqGranulocytes_IL8		PTPRR		phosphatase		-0.927	bias	0.454	-1.828	0.00425	NT5DC2,RAB5B,SLC44A2,UQCRC1
eqGranulocytes_IL8		miR-30c-5p (and other miRNAs w/seed GUAAACA)		mature microrna		1.41	bias	0.473	0.384	0.00442	CBFB,HNRNPM,MPDU1,SEC23A,UBE2I
eqGranulocytes_IL8		24-hydroxycholesterol		chemical - endogenous mammalian						0.00448	APOE,HSPA5
eqGranulocytes_IL8		GTF2I		transcription regulator						0.00448	HSPA5,THBS1
eqGranulocytes_IL8		PDGF (family)		group						0.00448	HSPD1,P4HB
eqGranulocytes_IL8		YARS2		enzyme						0.00448	MT-CO2,UQCRC1
eqGranulocytes_IL8		lith-O-Asp		chemical reagent						0.00448	HNRNPA2B1,PXN
eqGranulocytes_IL8		NFKB1	-1.828	transcription regulator		0	bias	-0.346	0.693	0.00452	APOE,B2M,HSP90B1,KHSRP,PXN,RELA,SYTL1	MYCN,NFKB1,NR3C1,RELA,SP1,TNF,TP53
eqGranulocytes_IL8		decitabine		chemical drug		-0.051		-0.191	0.569	0.0049	APOE,B2M,CD9,DNM3,FUBP1,GLRX,HNRNPA2B1,HNRNPD,HSPA5,NUCKS1,PABPC1,SRI,THBS1
eqGranulocytes_IL8		SREBF2		transcription regulator		-1.951	bias	-0.372	-1.224	0.00508	ALDOC,DBI,FABP5,PCYT1A	SREBF1,SREBF2
eqGranulocytes_IL8		ALKBH1		enzyme						0.0051	MT-CO2,TAGLN2
eqGranulocytes_IL8		CRTC1		transcription regulator						0.0051	CYCS,MT-CO2
eqGranulocytes_IL8		ERG		transcription regulator	Inhibited	-2.164	bias	-0.323	-1.464	0.00521	ILK,PLEK,PXN,THBS1,VWF,WIPF1
eqGranulocytes_IL8		RGS2		enzyme		1	bias	0.253	0.495	0.00526	ERP29,HSP90B1,PPIB,SLC16A3	HIF1A,Insulin,PPARA,RGS2,XBP1
eqGranulocytes_IL8		SP2509		chemical reagent		1.89		0.132	1.54	0.00529	DNM3,FUBP1,HNRNPA2B1,HNRNPD,HSPA5,NUCKS1,SRI
eqGranulocytes_IL8		nitrofurantoin		chemical drug		0.447		-0.06	0.582	0.00544	ACTB,APOE,DBI,HSPA5,PCYT1A
eqGranulocytes_IL8		OSM		cytokine		-0.6		-0.169	-0.085	0.00546	B2M,COX6B1,DHRS7,HSPA5,MPDU1,RELA,S100A9,SEPTIN9,SLC16A3,STK4
eqGranulocytes_IL8		SMYD1		transcription regulator						0.00551	CYCS,MIF,UQCRC1
eqGranulocytes_IL8		NBEAL2	1.144	other						0.00575	THBS1,VWF
eqGranulocytes_IL8		manganese		chemical - endogenous mammalian						0.00575	HSP90B1,HSPA5
eqGranulocytes_IL8		dihydrotestosterone		chemical - endogenous mammalian						0.00578	ACTB,APOE,B2M,CCT3,DBI,FKBP4,GLRX3,HINT1,MT-CO2,RELA,THBS1	APP,ESR2,NR3C1,RELA,TP53,dihydrotestosterone
eqGranulocytes_IL8		tazemetostat		chemical drug		1.89		0.127	1.554	0.00596	DNM3,FUBP1,HNRNPA2B1,HNRNPD,HSPA5,NUCKS1,SRI
eqGranulocytes_IL8		VEGFA		growth factor		-0.724	bias	-0.34	0.149	0.00606	ATP5PO,CBFB,CD55,COX6B1,HSPA5,SET,THBS1
eqGranulocytes_IL8		CA9		enzyme						0.00611	ATP5F1C,ATP5PO,UQCRC1
eqGranulocytes_IL8		HSPA5	-1.569	enzyme						0.00611	HSP90B1,HSPA5,P4HB	ERN1,HIF1A,HSPA5,Insulin,PPARA,XBP1
eqGranulocytes_IL8		cuprizone		chemical toxicant	Inhibited	-2		-0.14	-1.721	0.00621	CNN3,CTSZ,DBI,FABP5
eqGranulocytes_IL8		MRTFB		transcription regulator						0.0063	ACTB,CBFB,S100A9,THBS1,TUBB1
eqGranulocytes_IL8		forskolin		chemical toxicant		1.287		-0.219	1.966	0.00633	ACTB,ALDOC,CD55,CD9,ILK,MAPRE2,MIF,PDE4D,PLIN3,PRKAR2B,TAGLN2,THBS1
eqGranulocytes_IL8		TNFSF12		cytokine		0.927		-0.137	1.199	0.00641	ATP5PO,CYCS,MT-CO2,S100A9
eqGranulocytes_IL8		(+)-catechin		chemical drug						0.00644	HSPA5,RELA
eqGranulocytes_IL8		CREB3		transcription regulator						0.00644	FKBP4,HSPA5
eqGranulocytes_IL8		mir-515		microrna						0.00644	KHSRP,RELA
eqGranulocytes_IL8		salvianolic acid B		chemical - endogenous non-mammalian						0.00644	HSP90B1,HSPA5
eqGranulocytes_IL8		F2R		g-protein coupled receptor		-1.131	bias	-0.306	-0.525	0.00662	CD55,MIF,THBS1,VWF
eqGranulocytes_IL8		PPARA		ligand-dependent nuclear receptor		0.24		-0.138	0.597	0.00668	AHCY,APOE,CYCS,DBI,FABP3,FABP5,MT-CO2,S100A9,UQCRC1	HIF1A,Insulin,MYCN,NFKB1,NR3C1,PPARA,RELA,SREBF1,SREBF2,TNF,TP53,XBP1,cholesterol
eqGranulocytes_IL8		PRL		cytokine		-0.721	bias	-0.293	0.044	0.00668	ACTB,B2M,CNN3,HSPD1,P4HB,SAMD9,ZYX
eqGranulocytes_IL8		SP1		transcription regulator		-0.813	bias	-0.407	0.163	0.00674	APOE,CD55,HINT1,HSPA5,LTB4R,PCYT1A,PRKAR2B,RELA,SF1,VWF
eqGranulocytes_IL8		ALYREF	-1.486	transcription regulator						0.00674	APOE
eqGranulocytes_IL8		BANF1		other						0.00674	S100A9
eqGranulocytes_IL8		BMS-275183		chemical drug						0.00674	THBS1
eqGranulocytes_IL8		BMS200261		chemical reagent						0.00674	CD55
eqGranulocytes_IL8		COL10A1		other						0.00674	HSPA5
eqGranulocytes_IL8		Cadherin		group						0.00674	CDC42
eqGranulocytes_IL8		DNAJA4		other						0.00674	APOE
eqGranulocytes_IL8		E 3330		chemical drug						0.00674	RELA
eqGranulocytes_IL8		E. coli 0111:B4 peptidoglycan		chemical - endogenous non-mammalian						0.00674	DBI
eqGranulocytes_IL8		EIF2B2		translation regulator						0.00674	ACTB
eqGranulocytes_IL8		FARP2		other						0.00674	CDC42
eqGranulocytes_IL8		KDELR1		transporter						0.00674	HSPA5
eqGranulocytes_IL8		LINC00672		other						0.00674	LASP1
eqGranulocytes_IL8		MT-21		chemical drug						0.00674	CYCS
eqGranulocytes_IL8		PRR13		other						0.00674	THBS1
eqGranulocytes_IL8		PSMD1	1.018	other						0.00674	RELA
eqGranulocytes_IL8		PSMD3	1.895	other						0.00674	RELA
eqGranulocytes_IL8		RHOU		enzyme						0.00674	CDC42
eqGranulocytes_IL8		STXBP3		transporter						0.00674	HSPA5
eqGranulocytes_IL8		T2		other						0.00674	ATP5PO
eqGranulocytes_IL8		TLR4-IN-C34		chemical reagent						0.00674	HSPA5
eqGranulocytes_IL8		USP49		peptidase						0.00674	FKBP4
eqGranulocytes_IL8		ZBTB2		transcription regulator						0.00674	RELA
eqGranulocytes_IL8		ZNF184		transcription regulator						0.00674	S100A9
eqGranulocytes_IL8		agar		chemical - endogenous non-mammalian						0.00674	RBM3
eqGranulocytes_IL8		cevimeline		chemical drug						0.00674	HNRNPA2B1
eqGranulocytes_IL8		dichlorvos		chemical toxicant						0.00674	PPIA
eqGranulocytes_IL8		hydrocortisone phosphate		chemical drug						0.00674	APOE
eqGranulocytes_IL8		mir-542		microrna						0.00674	ILK
eqGranulocytes_IL8		takinib		chemical drug						0.00674	MIF
eqGranulocytes_IL8		cardiotoxin		chemical - other						0.00686	APRT,B2M,HSPA5,LTB4R,S100A9,THBS1
eqGranulocytes_IL8		testosterone		chemical - endogenous mammalian		0.163		-0.194	0.703	0.00693	CYCS,HSPA5,HSPD1,MT-CO2,PSMA2,PXN,RELA,THBS1	APP,EGFR,ESR1,ESR2,HIF1A,IFNG,MYC,MYCN,NFKB1,NR3C1,RELA,TNF,TP53,beta-estradiol,testosterone
eqGranulocytes_IL8		EFNA2		kinase						0.00708	DSC1,FABP5,PXN
eqGranulocytes_IL8		ATXN2		other						0.00717	HSPA5,PABPC1
eqGranulocytes_IL8		actinomycin D		biologic drug		-1.633		0.238	-2.217	0.00726	ACTB,ATP1A1,CD55,LTB4R,PXN,RELA	HIF1A,IFNG,MYCN,NFKB1,NR3C1,RELA,SP1,TNF,TP53,actinomycin D
eqGranulocytes_IL8		4-phenylbutyric acid		chemical - endogenous mammalian		1.125		0.034	1.06	0.0075	HSP90B1,HSPA5,OLR1,RELA	4-phenylbutyric acid,MYCN,NFKB1,NR3C1,RELA,TNF,TP53
eqGranulocytes_IL8		oleic acid		chemical - endogenous mammalian	Inhibited	-2.129		-0.096	-1.925	0.0076	APOE,FABP5,HSPA5,OLR1,PLIN3	HIF1A,IL1B,MYCN,NFKB1,NR3C1,POU2F1,PPARA,RELA,SREBF1,TNF,TP53,cholesterol,oleic acid
eqGranulocytes_IL8		GATA2		transcription regulator		0.152		-0.138	0.426	0.00764	CDC42,ITGA2B,LTB4R,MMRN1,S100A9,THBS1,TREML1,TUBB1
eqGranulocytes_IL8		SB203580		chemical drug		0.954	bias	0.385	-0.187	0.00766	CD55,ERP29,FABP3,GLRX,HSPA5,OLR1,RBM3,RELA,THBS1	HIF1A,IL1B,MYCN,NFKB1,NR3C1,POU2F1,PPARA,RELA,SB203580,TNF,TP53
eqGranulocytes_IL8		MYCN		transcription regulator		0.277		-0.087	0.505	0.00783	ACTB,B2M,CDC42,HSPD1,MYL12A,RPL7,ZYX
eqGranulocytes_IL8		CREB3L1		transcription regulator						0.00793	HSP90B1,HSPA5
eqGranulocytes_IL8		RAB2A	1.102	enzyme						0.00793	FABP5,PLIN3
eqGranulocytes_IL8		puromycin		chemical - endogenous non-mammalian						0.00793	HSPA5,RBM3
eqGranulocytes_IL8		IL1B		cytokine		0.349		-0.159	0.935	0.00795	APOE,ATP1A1,B2M,CD55,CTSZ,DBI,FABP5,HSPA5,MIF,MT-CO2,OLR1,P4HB,RELA,S100A9,THBS1,ZYX	D-glucose,HIF1A,IFNG,IL1B,LDLR,MYCN,NFKB1,NR3C1,RELA,SREBF1,TNF,TP53
eqGranulocytes_IL8		PD98059		chemical - kinase inhibitor	Activated	2.123	bias	0.295	1.213	0.00798	CD55,CYCS,HNRNPA2B1,HSPA5,ITGA2B,MIF,PABPC1,PCYT1A,RELA,THBS1	EGFR,HIF1A,IL1B,MYC,MYCN,NFKB1,NR3C1,PD98059,POU2F1,PPARA,RELA,SP1,TNF,TP53
eqGranulocytes_IL8		CPT1B		enzyme		1.664		0.159	1.278	0.00811	ATP5F1C,COX6B1,DBI,FABP3,FUBP1,PRKAR2B
eqGranulocytes_IL8		HOXA10		transcription regulator		-0.447		0.149	-0.779	0.00813	ACTB,APOE,FCER1G,P4HB,RELA
eqGranulocytes_IL8		ESR2		ligand-dependent nuclear receptor		-1.706		-0.14	-1.317	0.00821	APOE,CCT3,DBI,GLRX,HSPD1,MYL12A,PABPC1,RELA,S100A9,SYNCRIP,THBS1,VWF	ESR1,ESR2,MYCN,NFKB1,NR3C1,RELA,TNF,TP53,beta-estradiol
eqGranulocytes_IL8		Esrra		transcription regulator						0.00844	ALDOC,ATP1A1,ATP5PO,CYCS
eqGranulocytes_IL8		SYK	-1.191	kinase		0.218		-0.045	0.307	0.00844	FCER1G,PRKAR2B,RCSD1,RELA
eqGranulocytes_IL8		PTP4A1		phosphatase		0		-0.119	0.236	0.00869	AHCY,DNAJB1,HNRNPH1,TAGLN2
eqGranulocytes_IL8		OSBPL8	4.507	transporter						0.00873	APOE,HSPA5
eqGranulocytes_IL8		TUG1		other						0.00873	CYCS,HSPA5
eqGranulocytes_IL8		WT1		transcription regulator	Activated	2.416		-0.079	2.608	0.00902	AHCY,APRT,HSP90B1,MAPRE2,PPIB,THBS1
eqGranulocytes_IL8		Collagen type IV		complex						0.00956	RELA,THBS1	Collagen type IV,EGFR,MYC
eqGranulocytes_IL8		DOT1L		phosphatase						0.00956	PABPC1,PPIA
eqGranulocytes_IL8		OPA1		enzyme						0.00956	HSPA5,S100A9
eqGranulocytes_IL8		V-PYRRO/NO		chemical reagent						0.00956	RELA,THBS1
eqGranulocytes_IL8		farnesol		chemical reagent						0.00956	HSP90B1,HSPA5
eqGranulocytes_IL8		miR-199a-3p (and other miRNAs w/seed CAGUAGU)		mature microrna						0.00956	FUBP1,RELA
eqGranulocytes_IL8		selenomethylselenocysteine		chemical - endogenous mammalian						0.00956	ATP1A1,ATP1B3
eqGranulocytes_IL8		CD247		transmembrane receptor						0.00969	FCER1G,RBM3,VPS4B
eqGranulocytes_IL8		CLEC11A		growth factor						0.00969	LTB4R,MIF,ZYX	CLEC11A,MYCN,NFKB1,NR3C1,RELA,TNF,TP53
eqGranulocytes_IL8		POU2F1		transcription regulator						0.00974	CD55,OLR1,RELA,VWF
eqGranulocytes_IL8		torin1		chemical reagent						0.0101	ALDOC,ATP6AP1,COX6B1,PABPC1,RPL7
eqGranulocytes_IL8		GSTO1	-1.553	enzyme						0.0101	CD9,SAMD9,THBS1
eqGranulocytes_IL8		HFE		transmembrane receptor		-1		0.072	-1.144	0.0103	B2M,HSP90B1,HSPA5,HSPD1
eqGranulocytes_IL8		JAK2		kinase						0.0103	ACTB,KDM6A,MYL12A,SET,THBS1
eqGranulocytes_IL8		MECP2		transcription regulator						0.0103	ACTB,APOE,GSTO1,HSPA5,UQCRC1
eqGranulocytes_IL8		4-O-carboxymethylascochlorin		chemical reagent						0.0104	FUBP1,HSPA5
eqGranulocytes_IL8		ETS		group						0.0104	ITGA2B,VWF
eqGranulocytes_IL8		NFE2		transcription regulator						0.0104	ITGA2B,TUBB1
eqGranulocytes_IL8		PLCG1		enzyme						0.0104	ALDOC,THBS1
eqGranulocytes_IL8		PPIA	-1.412	enzyme						0.0104	PPIA,TAGLN2
eqGranulocytes_IL8		TFAM		transcription regulator						0.0104	FABP3,FABP5
eqGranulocytes_IL8		miR-30a-3p (and other miRNAs w/seed UUUCAGU)		mature microrna						0.0104	RAB8B,THBS1
eqGranulocytes_IL8		miR-122-5p (miRNAs w/seed GGAGUGU)		mature microrna						0.0105	FUBP1,P4HB,RAB11FIP1
eqGranulocytes_IL8		IL3		cytokine						0.0106	CBFB,CCT5,HNRNPA2B1,HSP90B1,HSPA5,RBM3,RPL7
eqGranulocytes_IL8		SRF		transcription regulator		-0.655		-0.199	-0.264	0.0106	ACTB,GLRX3,ITGA2B,PPIA,S100A9,TMOD3,ZYX
eqGranulocytes_IL8		tetradecanoylphorbol acetate		chemical drug		0.072		-0.24	0.912	0.0107	ACTB,APRT,CD55,CDC42,FCER1G,GLRX3,HNRNPC,HSPA5,ITGA2B,OLR1,PDE4D,PLIN3,PRKAR2B,RELA,S100A9,THBS1
eqGranulocytes_IL8		tributyltin		chemical reagent						0.0109	CYCS,SH2D3C,THBS1,UQCRC1
eqGranulocytes_IL8		CLDN7		other		1.987		0.011	1.965	0.0111	APOE,MCU,MLEC,NUDT21
eqGranulocytes_IL8		STAT5a/b		group						0.0111	FCER1G,ITGA2B,TUBB1,VWF
eqGranulocytes_IL8		E. coli B5 lipopolysaccharide		chemical - endogenous non-mammalian		-1.342		-0.232	-0.822	0.0113	B2M,DBI,PPIA,RELA,THBS1,UBE2I
eqGranulocytes_IL8		PD184352		chemical drug						0.0113	HSPA5,TRMT112
eqGranulocytes_IL8		EFNA1		other						0.0114	DSC1,FABP5,PXN
eqGranulocytes_IL8		RETN	-2.155	other						0.0114	FABP3,FABP5,RELA
eqGranulocytes_IL8		trovafloxacin		chemical drug						0.0114	B2M,THBS1,UBE2I
eqGranulocytes_IL8		DDIT3		transcription regulator						0.0114	AVIL,HSPA5,HSPD1,HSPE1
eqGranulocytes_IL8		5-hydroxytryptamine		chemical - endogenous mammalian						0.0117	ITGA2B,PLIN3,RAB8A,THBS1
eqGranulocytes_IL8		PPARG		ligand-dependent nuclear receptor		-1.561		-0.141	-1.217	0.0118	APOE,ATP5PO,CYCS,FABP3,FABP5,OLR1,PLIN3,RELA,WIPF1
eqGranulocytes_IL8		calphostin C		chemical drug						0.0119	HSP90B1,HSPA5,P4HB
eqGranulocytes_IL8		mir-133		microrna						0.0119	CDC42,CORO1C,LASP1
eqGranulocytes_IL8		CD40		transmembrane receptor	Inhibited	-2.611	bias	-0.385	-1.606	0.012	COX6B1,HSP90B1,HSPA5,HSPD1,HSPE1,RELA,UQCRC1
eqGranulocytes_IL8		7-ketocholesterol		chemical - endogenous mammalian						0.0123	HSPA5,RELA
eqGranulocytes_IL8		ADRB1		g-protein coupled receptor						0.0123	HSPA5,THBS1
eqGranulocytes_IL8		SDCBP	-1.245	enzyme						0.0123	CDC42,PEBP1
eqGranulocytes_IL8		carfilzomib		biologic drug						0.0123	HSP90B1,HSPA5
eqGranulocytes_IL8		CDK4/6		group						0.0123	LASP1,PCYT1A,TUBB1
eqGranulocytes_IL8		KDM5A		transcription regulator		1	bias	0.402	0.196	0.0127	ATP1A1,CD55,COX6B1,UQCRC1
eqGranulocytes_IL8		AR		ligand-dependent nuclear receptor		-1.444		-0.203	-0.811	0.0128	ATP6AP1,CCT3,CNN3,COX6B1,FABP5,FKBP4,HSPA5,MT-CO2,THBS1,WIPF1,ZYX
eqGranulocytes_IL8		PCSK9		peptidase						0.0132	CD9,OLR1
eqGranulocytes_IL8		TF	-1.082	transporter						0.0132	ERP29,RELA
eqGranulocytes_IL8		tauroursodeoxycholic acid		chemical - endogenous mammalian						0.0132	HSPA5,RELA
eqGranulocytes_IL8		ATF4		transcription regulator						0.0133	APOE,CD55,HSP90B1,HSPA5,NAPA
eqGranulocytes_IL8		AFM		transporter						0.0134	APOE
eqGranulocytes_IL8		B4GALNT2		enzyme						0.0134	VWF
eqGranulocytes_IL8		DST		other						0.0134	HSPA5
eqGranulocytes_IL8		ELOC	-1.497	transcription regulator						0.0134	HNRNPA2B1
eqGranulocytes_IL8		IPO9	2.365	other						0.0134	PXN
eqGranulocytes_IL8		MAP4K3		kinase						0.0134	CDC42
eqGranulocytes_IL8		NE 100		chemical reagent						0.0134	HSPA5
eqGranulocytes_IL8		Nedd4		enzyme						0.0134	THBS1
eqGranulocytes_IL8		PACS2		other						0.0134	HSPA5
eqGranulocytes_IL8		PNKP		kinase						0.0134	MT-CO2
eqGranulocytes_IL8		PPP1R3A		phosphatase						0.0134	THBS1
eqGranulocytes_IL8		PYDC2		other						0.0134	RELA
eqGranulocytes_IL8		RPS19	1.534	other						0.0134	MIF
eqGranulocytes_IL8		SFTPA2		other						0.0134	HSPA5
eqGranulocytes_IL8		SGF29		other						0.0134	HSPA5
eqGranulocytes_IL8		SLIT3		other						0.0134	CDC42
eqGranulocytes_IL8		VPS33B		transporter						0.0134	VWF
eqGranulocytes_IL8		YiXinShu		chemical drug						0.0134	FABP3
eqGranulocytes_IL8		chitosan oligosaccharide		chemical - endogenous mammalian						0.0134	RELA
eqGranulocytes_IL8		elesclomol		chemical drug						0.0134	MT-CO2
eqGranulocytes_IL8		ingenol-dibenzoate		chemical reagent						0.0134	CD55
eqGranulocytes_IL8		lynestrenol		chemical drug						0.0134	APOE
eqGranulocytes_IL8		miR-1185-5p (and other miRNAs w/seed GAGGAUA)		mature microrna						0.0134	KDM6A
eqGranulocytes_IL8		miR-155-3p (miRNAs w/seed UCCUACC)		mature microrna						0.0134	DNAJB1
eqGranulocytes_IL8		nexrutine		chemical drug						0.0134	RELA
eqGranulocytes_IL8		ristocetin		chemical toxicant						0.0134	VWF
eqGranulocytes_IL8		tetrahydrouridine		chemical drug						0.0134	HSPA5
eqGranulocytes_IL8		TREM2		transmembrane receptor						0.0138	B2M,CYCS,FABP5
eqGranulocytes_IL8		CEBPA		transcription regulator		0.728		-0.16	1.116	0.0139	CYCS,GLRX,HSPA5,MMRN1,OLR1,S100A9,THBS1,UBE2I
eqGranulocytes_IL8		FLCN		other		0.988	bias	0.39	0.217	0.014	ATP5PO,CTSZ,CYCS,MT-CO2
eqGranulocytes_IL8		C5AR1	2.086	g-protein coupled receptor						0.0148	CD55,FCER1G,HSPA5
eqGranulocytes_IL8		ITGB3	-2.867	transmembrane receptor						0.0148	HSP90B1,ILK,ITGA2B
eqGranulocytes_IL8		Immunoglobulin		complex		-0.048		-0.034	0.057	0.0151	APOE,B2M,CD9,COX6B1,CTSZ,FCER1G,GSK3A,LTB4R,OLR1,PDIA6,PLEK,RELA,S100A9
eqGranulocytes_IL8		miR-16-5p (and other miRNAs w/seed AGCAGCA)		mature microrna		0.663	bias	0.473	-0.382	0.0152	HSP90B1,RNASEL,SLC16A3,WIPF1,ZYX
eqGranulocytes_IL8		rifaximin		chemical drug						0.0152	FUBP1,HNRNPC
eqGranulocytes_IL8		PKD1		ion channel		1.067		0.09	0.89	0.0155	ARHGAP10,ATP1A1,HSP90B1,SEPTIN7,VWF
eqGranulocytes_IL8		lipofermata		chemical reagent						0.0163	HSP90B1,HSPA5
eqGranulocytes_IL8		sterol		chemical - endogenous mammalian						0.0163	DBI,PCYT1A
eqGranulocytes_IL8		PPARGC1B		transcription regulator						0.0164	ATP5PO,CYCS,MT-CO2
eqGranulocytes_IL8		INSR		kinase		-1.254		-0.232	-0.646	0.0167	ATP1A1,ATP5PO,CYCS,GNB1,GSK3A,HSPD1,MT-CO2,OLR1,UQCRC1
eqGranulocytes_IL8		vancomycin		biologic drug	Inhibited	-2.236		-0.168	-1.86	0.0169	CD9,EPS15L1,RBM3,SET,TES
eqGranulocytes_IL8		FBXW7		enzyme						0.0169	HSPE1,MT-CO2,RELA
eqGranulocytes_IL8		BCAP31	1.289	transporter						0.0174	CD9,HSPA5
eqGranulocytes_IL8		IPMK		kinase						0.0174	ACTB,TAGLN2
eqGranulocytes_IL8		YWHAZ	-1.167	enzyme						0.0174	HSP90B1,HSPA5
eqGranulocytes_IL8		epoxomicin		chemical - protease inhibitor						0.0174	HSPA5,PSMA2
eqGranulocytes_IL8		NR3C2		ligand-dependent nuclear receptor						0.0177	APOE,CNN3,FKBP4,PPIB
eqGranulocytes_IL8		Firre		other						0.0181	FKBP4,PGLS,TAGLN2
eqGranulocytes_IL8		METTL3		enzyme						0.0185	CD9,CYCS
eqGranulocytes_IL8		betaine		chemical - endogenous mammalian						0.0185	B2M,HSPA5
eqGranulocytes_IL8		bufalin		chemical reagent						0.0185	HSPA5,ILK
eqGranulocytes_IL8		YY1		transcription regulator						0.0192	HNRNPC,HSPA5,RAB8B,RELA,SYNCRIP,VWF
eqGranulocytes_IL8		SIRT3		enzyme						0.0193	CYCS,HSPA5,MT-CO2
eqGranulocytes_IL8		FOXC1		transcription regulator		0	bias	-0.274	0.547	0.0193	B2M,DSC1,RNASEL,WDR72
eqGranulocytes_IL8		IFRD1		other						0.0196	CTSZ,PPIA
eqGranulocytes_IL8		L 663536		chemical reagent						0.0196	HSPA5,RELA
eqGranulocytes_IL8		POLG		enzyme						0.0196	MT-CO2,RPL7
eqGranulocytes_IL8		crocidolite asbestos		chemical toxicant						0.0196	ILK,ZYX
eqGranulocytes_IL8		hydrogen peroxide		chemical - endogenous mammalian		-1.294		-0.243	-0.612	0.0197	CD55,CYCS,DNAJB1,GLRX,HSPA5,LTB4R,MIF,MT-CO2,RELA
eqGranulocytes_IL8		PI3K (complex)		complex	Inhibited	-2	bias	-0.334	-1.332	0.0197	CD55,FABP5,LASP1,PRKAR2B,RELA,THBS1
eqGranulocytes_IL8		PRKCE		kinase						0.0199	CD55,HSPA5,ITGA2B
eqGranulocytes_IL8		(6S)-hydroxyhyoscyamine		chemical drug						0.0201	HSPA5
eqGranulocytes_IL8		2,5-dimethylcelecoxib		chemical reagent						0.0201	HSPA5
eqGranulocytes_IL8		2-phenylacetylenesulfonamide		chemical reagent						0.0201	MT-CO2
eqGranulocytes_IL8		22-hydroxycholesterol		chemical - endogenous mammalian						0.0201	APOE
eqGranulocytes_IL8		3K3A-APC protein		biologic drug						0.0201	RELA
eqGranulocytes_IL8		4-aminopyrazolo(3,4-d)pyrimidine		chemical reagent						0.0201	APOE
eqGranulocytes_IL8		ATP1A2		transporter						0.0201	ATP1A1
eqGranulocytes_IL8		BCDIN3D		enzyme						0.0201	ALDOC
eqGranulocytes_IL8		COL7A1		other						0.0201	THBS1
eqGranulocytes_IL8		DPYSL2	-1.644	enzyme						0.0201	RELA
eqGranulocytes_IL8		ECD		transcription regulator						0.0201	HSPA5
eqGranulocytes_IL8		EDEM1		enzyme						0.0201	HSPA5
eqGranulocytes_IL8		EXOC3L1		other						0.0201	SEPTIN9
eqGranulocytes_IL8		F5		other						0.0201	MMRN1
eqGranulocytes_IL8		HS-243		chemical - kinase inhibitor						0.0201	MIF
eqGranulocytes_IL8		MAP2		other						0.0201	PRKAR2B
eqGranulocytes_IL8		PPP1R1A		phosphatase						0.0201	HSPA5
eqGranulocytes_IL8		PRMT8		enzyme						0.0201	EIF4H
eqGranulocytes_IL8		Pdi		group						0.0201	HSPA5
eqGranulocytes_IL8		RGS18		enzyme						0.0201	TREML1
eqGranulocytes_IL8		RNH1	-1.723	other						0.0201	ILK
eqGranulocytes_IL8		SDF4		other						0.0201	HSPA5
eqGranulocytes_IL8		SEC23B		transporter						0.0201	HSP90B1
eqGranulocytes_IL8		SERTAD1		transcription regulator						0.0201	SET
eqGranulocytes_IL8		SRI	-1.604	transporter						0.0201	HSPA5
eqGranulocytes_IL8		TBC1D10A		other						0.0201	RAB8A
eqGranulocytes_IL8		TFLLR		chemical reagent						0.0201	CD55
eqGranulocytes_IL8		TRD		other						0.0201	FCER1G
eqGranulocytes_IL8		Tardbp		transcription regulator						0.0201	VPS4B
eqGranulocytes_IL8		bongkrekic acid		chemical toxicant						0.0201	CYCS
eqGranulocytes_IL8		cibacron blue F 3GA		chemical reagent						0.0201	THBS1
eqGranulocytes_IL8		glycosylated somatostatin derivative smsDX		chemical reagent						0.0201	HSPA5
eqGranulocytes_IL8		glyphosate		chemical toxicant						0.0201	S100A9
eqGranulocytes_IL8		lapaquistat		chemical drug						0.0201	HSPA5
eqGranulocytes_IL8		methoxyacetic acid		chemical toxicant						0.0201	PDE4D
eqGranulocytes_IL8		RXRA		ligand-dependent nuclear receptor						0.0203	AHCY,APOE,FABP3,FABP5,ILK,OLR1
eqGranulocytes_IL8		CD40LG		cytokine	Inhibited	-2.415	bias	-0.389	-1.476	0.0203	APRT,B2M,MIF,PLEK,PSMA2,RELA,STK4
eqGranulocytes_IL8		STK11		kinase		-0.64		-0.091	-0.419	0.0206	AHCY,ATP5F1C,AVIL,CDC42,COX6B1,UQCRC1
eqGranulocytes_IL8		RET	1.262	kinase						0.0206	FKBP4,HSPD1,S100A9,TAGLN2
eqGranulocytes_IL8		BMS-690514		chemical drug						0.0208	CYCS,HSPE1
eqGranulocytes_IL8		KDM6B		enzyme						0.0208	ITGA2B,PPIA
eqGranulocytes_IL8		LCAT		enzyme						0.0208	APOE,HSPA5
eqGranulocytes_IL8		SLC30A7		transporter						0.0208	CD55,FABP3
eqGranulocytes_IL8		SPTLC2		enzyme						0.0208	HSPA5,THBS1
eqGranulocytes_IL8		ammonium chloride		chemical drug						0.0208	ATP1A1,CD9
eqGranulocytes_IL8		proteasome inhibitor PSI		chemical - protease inhibitor						0.0208	CD55,HSPA5
eqGranulocytes_IL8		tripterine		chemical - endogenous non-mammalian						0.0208	DNAJB1,OLR1
eqGranulocytes_IL8		ELAVL1	-13.08	other						0.0211	ATP1B3,B2M,HNRNPD,KHSRP,VAPB
eqGranulocytes_IL8		EIF2AK3		kinase		-1.053	bias	-0.347	-0.363	0.0219	HSPA5,NAPA,RNASEL,USO1
eqGranulocytes_IL8		CRTC2		other						0.022	CYCS,MT-CO2
eqGranulocytes_IL8		NRXN1		transporter						0.022	MMRN1,THBS1
eqGranulocytes_IL8		PRKG1		kinase						0.022	HINT1,THBS1
eqGranulocytes_IL8		RAB1B	1.558	other						0.022	NAPA,USO1
eqGranulocytes_IL8		THBS4		other						0.022	HSPA5,P4HB
eqGranulocytes_IL8		dithiothreitol		chemical reagent						0.022	HSP90B1,HSPA5
eqGranulocytes_IL8		glycyrrhizic acid		chemical drug						0.022	RELA,VWF
eqGranulocytes_IL8		fluoride		chemical - endogenous mammalian						0.0224	DNM3,HNRNPA2B1,HSPA5
eqGranulocytes_IL8		methylnitrosourea		chemical toxicant						0.0233	ATP1A1,ATP1B3
eqGranulocytes_IL8		COL18A1		other						0.0238	RELA,THBS1,VWF
eqGranulocytes_IL8		TRAP1		enzyme						0.0238	ARHGAP10,HSPD1,HSPE1
eqGranulocytes_IL8		COPS5	1.081	transcription regulator		-0.447		0.028	-0.509	0.024	APRT,FCER1G,HNRNPD,SYNCRIP,TNPO2
eqGranulocytes_IL8		EGLN		group		0	bias	0.456	-0.911	0.0243	ALDOC,MIF,S100A9,SLC16A3
eqGranulocytes_IL8		losartan potassium		chemical drug		0		0.181	-0.357	0.0243	ATP1A1,HSPA5,OLR1,S100A9
eqGranulocytes_IL8		thapsigargin		chemical toxicant		-0.62		-0.239	-0.1	0.0244	HSP90B1,HSPA5,OLR1,SRI,THBS1
eqGranulocytes_IL8		cerivastatin		chemical drug						0.0244	DBI,GNB1,S100A9
eqGranulocytes_IL8		MIR124		group						0.0245	RELA,SET
eqGranulocytes_IL8		MYL2		other						0.0245	HNRNPA2B1,HSPA5
eqGranulocytes_IL8		NCSTN	1.111	peptidase						0.0245	FCER1G,ITGA2B
eqGranulocytes_IL8		SFPQ	-1.149	other						0.0245	SF1,U2AF1/U2AF1L5
eqGranulocytes_IL8		indican		chemical - endogenous mammalian						0.0245	RELA,THBS1
eqGranulocytes_IL8		prostaglandin J2		chemical - endogenous mammalian						0.0245	PSMA2,PSMD6
eqGranulocytes_IL8		MDK		growth factor						0.0258	RELA,S100A9
eqGranulocytes_IL8		cyclopropanecarboxylic acid		chemical reagent						0.0258	HSPA5,P4HB
eqGranulocytes_IL8		sodium tungstate		chemical drug						0.0258	ACTB,TUBB1
eqGranulocytes_IL8		FSH		complex	Activated	2		-0.162	2.324	0.0259	ACTB,CD55,GNB1,ILK,MAPRE2,PLIN3,THBS1
eqGranulocytes_IL8		miR-155-5p (miRNAs w/seed UAAUGCU)		mature microrna		0	bias	0.473	-0.946	0.0262	CBFB,DNAJB1,DPP7,SYNE2
eqGranulocytes_IL8		Hbb-b1		transporter						0.0265	ATP5F1C,ATP5PO,UQCRC1
eqGranulocytes_IL8		PIK3R1	1.075	kinase						0.0265	ATP1A1,HSP90B1,HSPA5
eqGranulocytes_IL8		PKM	-1.404	kinase						0.0265	MT-CO2,PGLS,RELA
eqGranulocytes_IL8		SCAP		other						0.0265	ALDOC,FABP5,OLR1
eqGranulocytes_IL8		(-)-isoproterenol		chemical drug						0.0267	PDE4D
eqGranulocytes_IL8		(S)-duloxetine		chemical drug						0.0267	ACTB
eqGranulocytes_IL8		ABI1	-1.576	other						0.0267	PXN
eqGranulocytes_IL8		AKR1C3		enzyme						0.0267	FKBP4
eqGranulocytes_IL8		ATF6B		transcription regulator						0.0267	HSPA5
eqGranulocytes_IL8		BO-653		chemical drug						0.0267	PSMA2
eqGranulocytes_IL8		Bvr		group						0.0267	RELA
eqGranulocytes_IL8		CASQ1		other						0.0267	HSPA5
eqGranulocytes_IL8		CDK5RAP3		other						0.0267	HSPA5
eqGranulocytes_IL8		CHCHD4		enzyme						0.0267	MT-CO2
eqGranulocytes_IL8		Eif2		complex						0.0267	HSPA5
eqGranulocytes_IL8		GBP1	6.826	enzyme						0.0267	VWF
eqGranulocytes_IL8		GNG7	1.766	enzyme						0.0267	GNB1
eqGranulocytes_IL8		IRAK1BP1		other						0.0267	RELA
eqGranulocytes_IL8		MEDICA 16		chemical reagent						0.0267	HSPA5
eqGranulocytes_IL8		MM218		chemical reagent						0.0267	HSPA5
eqGranulocytes_IL8		Mia2		other						0.0267	HSPA5
eqGranulocytes_IL8		PAPOLA		enzyme						0.0267	MT-CO2
eqGranulocytes_IL8		PMX 205		chemical reagent						0.0267	THBS1
eqGranulocytes_IL8		Pif		other						0.0267	PSMC6
eqGranulocytes_IL8		SCIN		other						0.0267	ITGA2B
eqGranulocytes_IL8		SPG7		peptidase						0.0267	MCU
eqGranulocytes_IL8		STX12		other						0.0267	VWF
eqGranulocytes_IL8		UBA5		enzyme						0.0267	HSPA5
eqGranulocytes_IL8		UFC1		enzyme						0.0267	HSPA5
eqGranulocytes_IL8		USE1		other						0.0267	HSPA5
eqGranulocytes_IL8		VPS26A	1.618	transporter						0.0267	SNX27
eqGranulocytes_IL8		XRN2		enzyme						0.0267	ACTB
eqGranulocytes_IL8		chlordecone		chemical toxicant						0.0267	HSPA5
eqGranulocytes_IL8		crocin		chemical drug						0.0267	HSPA5
eqGranulocytes_IL8		etodolac		chemical drug						0.0267	THBS1
eqGranulocytes_IL8		gemcabene		chemical drug						0.0267	APOE
eqGranulocytes_IL8		hyodeoxycholic acid		chemical - endogenous mammalian						0.0267	APOE
eqGranulocytes_IL8		methyl cellosolve		chemical reagent						0.0267	PDE4D
eqGranulocytes_IL8		moxifloxacin		chemical drug						0.0267	RELA
eqGranulocytes_IL8		myristoylated protein kinase C peptide inhibitor		biologic drug						0.0267	CD55
eqGranulocytes_IL8		rubitecan		chemical drug						0.0267	PEBP1
eqGranulocytes_IL8		salsalate		chemical drug						0.0267	RELA
eqGranulocytes_IL8		sertindole		chemical drug						0.0267	ACTB
eqGranulocytes_IL8		thymeleatoxin		chemical toxicant						0.0267	CD55
eqGranulocytes_IL8		vapreotide		biologic drug						0.0267	THBS1
eqGranulocytes_IL8		HSF2		transcription regulator						0.0271	CCT3,CCT5
eqGranulocytes_IL8		KRT14		other						0.0271	DSC1,HSPA5
eqGranulocytes_IL8		VAV2	-1.397	transcription regulator						0.0271	CDC42,RELA
eqGranulocytes_IL8		IGF1		growth factor		-1.369		-0.226	-0.74	0.0272	HSPA5,LASP1,MIF,PEBP1,PLEK,RELA,SEC23A,THBS1,VWF
eqGranulocytes_IL8		FGF8		growth factor						0.0273	CYCS,RGP1,THBS1
eqGranulocytes_IL8		FGF19		growth factor						0.028	APOE,FABP3,FABP5
eqGranulocytes_IL8		cadmium chloride		chemical toxicant						0.028	DNAJB1,EIF3I,HSPA5
eqGranulocytes_IL8		mir-29		microrna						0.028	CDC42,OLR1,THBS1
eqGranulocytes_IL8		JAG2		growth factor						0.0285	LTB4R,MIF
eqGranulocytes_IL8		PRKAR1A	-1.527	kinase						0.0285	CDC42,PRKAR2B
eqGranulocytes_IL8		tetrachlorodibenzodioxin		chemical toxicant		0.479		-0.069	0.591	0.0285	CCT5,CD9,EPS15L1,GLRX,PRKAR2B,RELA,S100A9,THBS1
eqGranulocytes_IL8		Ige		complex		-0.816	bias	-0.352	0.047	0.0288	CYCS,FCER1G,HSPD1,MIF,NAPA,PEBP1
eqGranulocytes_IL8		mono-(2-ethylhexyl)phthalate		chemical toxicant		-0.762	bias	-0.378	-0.013	0.0294	ALDOC,OLR1,RELA,UQCRC1
eqGranulocytes_IL8		ASPSCR1-TFE3		fusion gene/product						0.0295	APOE,EPS15L1,PXN
eqGranulocytes_IL8		miR-291a-3p (and other miRNAs w/seed AAGUGCU)		mature microrna						0.0295	RELA,SEPTIN2,STK4
eqGranulocytes_IL8		APOB		transporter						0.0298	APOE,PSMC6
eqGranulocytes_IL8		PLP1		other						0.0298	HSPA5,SEPTIN2
eqGranulocytes_IL8		SIGLEC8	2.266	transmembrane receptor						0.0298	HSPE1,MIF
eqGranulocytes_IL8		DYSF		other						0.0299	B2M,CD55,CORO1C,DNAJB1
eqGranulocytes_IL8		methotrexate		chemical drug		-1.067		-0.053	-0.962	0.0301	ACTB,CYCS,PCYT1A,PPIA,THBS1
eqGranulocytes_IL8		ERBB2		kinase		-0.083		-0.203	0.356	0.0303	ACTB,ALDOC,ATP1B3,CD9,CDC42,DHRS7,ILK,MIF,MPPE1,NRBP1,THBS1,VWF
eqGranulocytes_IL8		NCOA3	6.505	transcription regulator						0.031	ILK,PSMA2,SLC16A3
eqGranulocytes_IL8		maslinic acid		chemical - endogenous non-mammalian						0.031	PRKAR2B,PXN,THBS1
eqGranulocytes_IL8		NORAD		other						0.0312	HSPA5,THBS1
eqGranulocytes_IL8		UCP2		transporter						0.0312	LTB4R,RELA
eqGranulocytes_IL8		1,2-dimethylhydrazine		chemical toxicant						0.0326	RELA,S100A9
eqGranulocytes_IL8		CP-55940		chemical reagent						0.0326	ACTB,ALDOC
eqGranulocytes_IL8		EFNA4		kinase						0.0326	DSC1,FABP5
eqGranulocytes_IL8		WNT4		cytokine						0.0326	FKBP4,RELA
eqGranulocytes_IL8		11-deoxyprostaglandin E1		chemical reagent						0.0333	PXN
eqGranulocytes_IL8		2-[[4-[(e)-styryl]phenoxy]methyl]oxirane		chemical reagent						0.0333	APOE
eqGranulocytes_IL8		8-epi-prostaglandin F2alpha		chemical - endogenous mammalian						0.0333	OLR1
eqGranulocytes_IL8		AOPEP		peptidase						0.0333	RELA
eqGranulocytes_IL8		ARHGEF25		other						0.0333	CDC42
eqGranulocytes_IL8		ASH2L		transcription regulator						0.0333	HSPA5
eqGranulocytes_IL8		ATP2A1	1.614	transporter						0.0333	HSPA5
eqGranulocytes_IL8		CDKN2D		transcription regulator						0.0333	PEBP1
eqGranulocytes_IL8		DVL3		other						0.0333	GSK3A
eqGranulocytes_IL8		EAF2		transcription regulator						0.0333	THBS1
eqGranulocytes_IL8		ERN2		kinase						0.0333	HSPA5
eqGranulocytes_IL8		FICD		enzyme						0.0333	DNAJB1
eqGranulocytes_IL8		GIT1		kinase						0.0333	PXN
eqGranulocytes_IL8		GNG13		enzyme						0.0333	GNB1
eqGranulocytes_IL8		Gata		group						0.0333	ITGA2B
eqGranulocytes_IL8		HAO1		enzyme						0.0333	HSPA5
eqGranulocytes_IL8		HCG18		other						0.0333	WIPF1
eqGranulocytes_IL8		IBSP		other						0.0333	THBS1
eqGranulocytes_IL8		JADE2		enzyme						0.0333	S100A9
eqGranulocytes_IL8		KPNA4	-2.097	other						0.0333	RELA
eqGranulocytes_IL8		LY379196		chemical drug						0.0333	CD55
eqGranulocytes_IL8		MICU1		other						0.0333	CYCS
eqGranulocytes_IL8		MYCT1		other						0.0333	CD9
eqGranulocytes_IL8		NCK2		kinase						0.0333	PXN
eqGranulocytes_IL8		OSU-CG12		chemical reagent						0.0333	HSPA5
eqGranulocytes_IL8		RACGAP1		transporter						0.0333	CDC42
eqGranulocytes_IL8		SLC22A3		transporter						0.0333	S100A9
eqGranulocytes_IL8		SLC30A5		transporter						0.0333	CD55
eqGranulocytes_IL8		W146		chemical reagent						0.0333	RELA
eqGranulocytes_IL8		WSB1		other						0.0333	ALDOC
eqGranulocytes_IL8		aurothiomalate		chemical drug						0.0333	MT-CO2
eqGranulocytes_IL8		econazole		chemical drug						0.0333	HSPA5
eqGranulocytes_IL8		kb-NB 142-70		chemical drug						0.0333	HSPA5
eqGranulocytes_IL8		lunasin		biologic drug						0.0333	CYCS
eqGranulocytes_IL8		marinobufagenin		chemical - endogenous mammalian						0.0333	ATP1A1
eqGranulocytes_IL8		mir-665		microrna						0.0333	KHSRP
eqGranulocytes_IL8		unsaturated guluronate oligosaccharide		chemical reagent						0.0333	RELA
eqGranulocytes_IL8		vidarabine		chemical drug						0.0333	FABP3
eqGranulocytes_IL8		cyclophosphamide		chemical drug						0.0334	B2M,RBM3,THBS1
eqGranulocytes_IL8		E2F3		transcription regulator		-1.067		-0.227	-0.618	0.0339	CD9,HSPD1,NUCKS1,THBS1
eqGranulocytes_IL8		calcitriol		chemical drug		-0.841		0.03	-0.925	0.034	GLRX,HSPD1,PDE4D,RAB11FIP1,RAB1B,RELA,S100A9,TAGLN2,THBS1
eqGranulocytes_IL8		ATF1		transcription regulator						0.0341	ATP1A1,THBS1
eqGranulocytes_IL8		BAG1		other						0.0341	ACTB,PXN
eqGranulocytes_IL8		EFNA3		kinase						0.0341	DSC1,FABP5
eqGranulocytes_IL8		SLC16A2		transporter						0.0341	RBM3,SLC16A3
eqGranulocytes_IL8		bezafibrate		chemical drug						0.0351	APOE,DBI,HSPA5
eqGranulocytes_IL8		EIF3E	-1.198	translation regulator						0.0355	CORO1C,THBS1
eqGranulocytes_IL8		cisplatin		chemical drug		-1.059		-0.17	-0.6	0.0358	ACTB,HSPA5,PEBP1,PPIA,PXN,RAB11FIP1,RAB8B,RBM3,RELA,TES,THBS1
eqGranulocytes_IL8		LCN2	-1.219	transporter						0.0359	CORO1C,MIF,TAGLN2
eqGranulocytes_IL8		CD24		other						0.0368	SYNE2,THBS1,USO1
eqGranulocytes_IL8		phosphate		chemical - endogenous mammalian						0.0368	DHRS7,HSPA5,TAGLN2
eqGranulocytes_IL8		ELANE		peptidase						0.037	HSPA5,LTB4R
eqGranulocytes_IL8		SKIV2L		enzyme						0.037	GLRX,S100A9
eqGranulocytes_IL8		lipid A		chemical toxicant						0.037	OLR1,THBS1
eqGranulocytes_IL8		nonylphenol		chemical toxicant						0.037	ATP5PO,ATP6AP1
eqGranulocytes_IL8		STAT5B	-1.046	transcription regulator		0		-0.152	0.372	0.0373	ACOT1,APOE,CD9,MMRN1,RELA,VWF
eqGranulocytes_IL8		NFYB		transcription regulator						0.0375	ACTB,MSRA,PSMC6,SEPTIN7,VWF
eqGranulocytes_IL8		2-deoxyglucose		chemical drug						0.0376	CYCS,HSP90B1,HSPA5
eqGranulocytes_IL8		miR-125b-5p (and other miRNAs w/seed CCCUGAG)		mature microrna						0.0376	CBFB,UBE2I,VPS4B
eqGranulocytes_IL8		HNRNPH1	-1.913	other						0.0386	ATP5PO,LASP1
eqGranulocytes_IL8		NME1		kinase						0.0386	HNRNPA2B1,PABPC1
eqGranulocytes_IL8		HNF4A		transcription regulator		0.152		-0.091	0.333	0.0391	ACOT1,APOE,CD55,CHMP1B,CTSZ,GSTO1,HNRNPC,HSP90B1,HSPA5,HSPE1,NAPA,NONO,PCYT1A,PSMA2,RAB1B,S100A9,SCFD1,SEC23A,SH2D3C,TAGLN2,TRMT112,USO1
eqGranulocytes_IL8		5-hydroxydecanoic acid		chemical - endogenous mammalian						0.0398	CYCS
eqGranulocytes_IL8		8-chloro-cAMP		chemical drug						0.0398	PRKAR2B
eqGranulocytes_IL8		ACADS		enzyme						0.0398	HSPA5
eqGranulocytes_IL8		AKAP11		other						0.0398	MT-CO2
eqGranulocytes_IL8		CLTRN		other						0.0398	ATP1A1
eqGranulocytes_IL8		CNGB3		ion channel						0.0398	HSPA5
eqGranulocytes_IL8		COL4A1		other						0.0398	HSPA5
eqGranulocytes_IL8		ECT2		other						0.0398	CDC42
eqGranulocytes_IL8		EIF3M		translation regulator						0.0398	MIF
eqGranulocytes_IL8		GATAD2A		transcription regulator						0.0398	S100A9
eqGranulocytes_IL8		LIMS2		other						0.0398	ILK
eqGranulocytes_IL8		LOC100288798		other						0.0398	CD9
eqGranulocytes_IL8		MALSU1		other						0.0398	MT-CO2
eqGranulocytes_IL8		MIA-313		chemical reagent						0.0398	RELA
eqGranulocytes_IL8		MIA-459		chemical reagent						0.0398	RELA
eqGranulocytes_IL8		NBR1		other						0.0398	HSPA5
eqGranulocytes_IL8		NCEH1		enzyme						0.0398	HSPA5
eqGranulocytes_IL8		PDCL		enzyme						0.0398	GNB1
eqGranulocytes_IL8		PDZ1i		chemical reagent						0.0398	CDC42
eqGranulocytes_IL8		PDZK1IP1		other						0.0398	MSRA
eqGranulocytes_IL8		Pzp		other						0.0398	APOE
eqGranulocytes_IL8		RAP1A	-1.053	enzyme						0.0398	THBS1
eqGranulocytes_IL8		RFC1		transcription regulator						0.0398	RELA
eqGranulocytes_IL8		RRM2		enzyme						0.0398	THBS1
eqGranulocytes_IL8		UFL1		enzyme						0.0398	HSPA5
eqGranulocytes_IL8		WZ-4002		chemical drug						0.0398	MT-CO2
eqGranulocytes_IL8		ZDHHC2		enzyme						0.0398	CD9
eqGranulocytes_IL8		ZMYND10		other						0.0398	THBS1
eqGranulocytes_IL8		ZNF207	-1.554	transcription regulator						0.0398	RBM3
eqGranulocytes_IL8		atenolol		chemical drug						0.0398	B2M
eqGranulocytes_IL8		azetidine		chemical reagent						0.0398	HSPA5
eqGranulocytes_IL8		beta-hydroxyisovaleric acid		chemical - endogenous mammalian						0.0398	PSMC6
eqGranulocytes_IL8		gelam honey		chemical reagent						0.0398	RELA
eqGranulocytes_IL8		inositol		chemical drug						0.0398	CD55
eqGranulocytes_IL8		penicillamine		chemical drug						0.0398	HSPA5
eqGranulocytes_IL8		remifentanil		chemical drug						0.0398	RELA
eqGranulocytes_IL8		risedronic acid		chemical drug						0.0398	HSPD1
eqGranulocytes_IL8		schizandrin B		chemical - endogenous non-mammalian						0.0398	RELA
eqGranulocytes_IL8		tirbanibulin		chemical drug						0.0398	PXN
eqGranulocytes_IL8		vanillyl-N-nonylamide		chemical drug						0.0398	HSPA5
eqGranulocytes_IL8		KLF2		transcription regulator						0.04	CD55,RELA,THBS1,VWF
eqGranulocytes_IL8		S100A4	-2.636	other						0.0401	S100A9,THBS1
eqGranulocytes_IL8		plicamycin		chemical drug						0.0403	MIF,NAPA,VWF
eqGranulocytes_IL8		RUNX1		transcription regulator						0.0411	HSPA5,ITGA2B,LTB4R,PLEK,S100A9
eqGranulocytes_IL8		PI3K (family)		group						0.0412	HSPA5,PXN,THBS1
eqGranulocytes_IL8		SERPINA1		other						0.0417	HSP90B1,HSPA5
eqGranulocytes_IL8		TOB1		transcription regulator						0.0417	DPP7,HUWE1
eqGranulocytes_IL8		tempol		chemical drug						0.0417	CYCS,RELA
eqGranulocytes_IL8		6-hydroxydopamine		chemical toxicant						0.0421	HSPA5,P4HB,PPIB
eqGranulocytes_IL8		PTGER2		g-protein coupled receptor						0.0421	HUWE1,PXN,THBS1
eqGranulocytes_IL8		ITGA5		transmembrane receptor						0.0432	APOE,PXN
eqGranulocytes_IL8		SP4		transcription regulator						0.0432	HSPA5,RELA
eqGranulocytes_IL8		Srgn		other						0.0432	S100A9,THBS1
eqGranulocytes_IL8		guanidinopropionic acid		chemical - endogenous non-mammalian						0.0432	ATP5PO,CYCS
eqGranulocytes_IL8		sildenafil		chemical drug						0.0432	HSPD1,HSPE1
eqGranulocytes_IL8		bexarotene		chemical drug		-0.218		-0.206	0.186	0.0434	APOE,CYCS,FKBP2,S100A9
eqGranulocytes_IL8		UCP1		transporter	Inhibited	-2		-0.043	-1.913	0.0447	GSTO1,PGLS,RNASEL,UQCRC1
eqGranulocytes_IL8		C3AR1		g-protein coupled receptor						0.0448	CD55,HSPA5
eqGranulocytes_IL8		FABP4		transporter						0.0448	FABP5,LTB4R
eqGranulocytes_IL8		KAT2B		transcription regulator						0.0448	B2M,HSPA5
eqGranulocytes_IL8		KLF1		transcription regulator						0.0448	CD55,ITGA2B
eqGranulocytes_IL8		TWIST2		transcription regulator						0.0448	HSPA5,RELA
eqGranulocytes_IL8		indomethacin		chemical drug	Inhibited	-2.219		-0.111	-1.972	0.0449	ACOT1,CD55,P4HB,RBM3,TES
eqGranulocytes_IL8		FOXO4		transcription regulator						0.0449	FABP5,HSP90B1,HSPA5
eqGranulocytes_IL8		PDX1		transcription regulator		0.832		-0.123	1.07	0.0454	ACTB,HSPA5,ILK,PDIA6
eqGranulocytes_IL8		bleomycin		biologic drug		-1.982	bias	-0.308	-1.371	0.0454	APOE,MIF,RELA,THBS1,VWF
eqGranulocytes_IL8		cyclic AMP		chemical - endogenous mammalian		-0.049	bias	-0.313	0.622	0.046	CDC42,CYCS,PDE4D,PRKAR2B,VWF
eqGranulocytes_IL8		15-E2-isoketal modified phosphatidylethanolamine		chemical reagent						0.0463	HSPA5
eqGranulocytes_IL8		20alpha-hydroxycholesterol		chemical - endogenous mammalian						0.0463	APOE
eqGranulocytes_IL8		24(S),25-epoxycholesterol		chemical - endogenous mammalian						0.0463	APOE
eqGranulocytes_IL8		APAF1	1.313	other						0.0463	HSPA5
eqGranulocytes_IL8		ATE1	2.357	enzyme						0.0463	ACTB
eqGranulocytes_IL8		CG-200745		chemical drug						0.0463	MSRA
eqGranulocytes_IL8		DIO1		enzyme						0.0463	SLC16A3
eqGranulocytes_IL8		EN2		transcription regulator						0.0463	ALDOC
eqGranulocytes_IL8		GSK 650394		chemical reagent						0.0463	HSPA5
eqGranulocytes_IL8		Gm26313		other						0.0463	THBS1
eqGranulocytes_IL8		HNRNPR	1.197	other						0.0463	THBS1
eqGranulocytes_IL8		Immunoglobulin Lambda Light Chain		group						0.0463	HSPA5
eqGranulocytes_IL8		MRPL14		other						0.0463	MT-CO2
eqGranulocytes_IL8		OSMI-1		chemical reagent						0.0463	HSPA5
eqGranulocytes_IL8		RAPGEF4		other						0.0463	THBS1
eqGranulocytes_IL8		SETBP1		transcription regulator						0.0463	SET
eqGranulocytes_IL8		SFTPC		other						0.0463	HSPA5
eqGranulocytes_IL8		SLC39A9		transporter						0.0463	CYCS
eqGranulocytes_IL8		SNAP23	1.133	transporter						0.0463	ITGA2B
eqGranulocytes_IL8		ST6GALNAC1		enzyme						0.0463	B2M
eqGranulocytes_IL8		WFS1	-1.89	enzyme						0.0463	HSPA5
eqGranulocytes_IL8		[Ac-His1,D-Phe2,Lys15,Arg16,Leu27]VIP-(3-7)-GRF-(8-27)		chemical reagent						0.0463	RELA
eqGranulocytes_IL8		acetazolamide		chemical drug						0.0463	HSPA5
eqGranulocytes_IL8		alectinib		chemical drug						0.0463	WIPF1
eqGranulocytes_IL8		alpha-keto-beta-methylvaleric acid		chemical - endogenous mammalian						0.0463	CYCS
eqGranulocytes_IL8		calpain inhibitor 2		chemical - protease inhibitor						0.0463	HSP90B1
eqGranulocytes_IL8		conduritol epoxide		chemical reagent						0.0463	CTSZ
eqGranulocytes_IL8		lupeol		chemical drug						0.0463	RELA
eqGranulocytes_IL8		miR-491-5p (and other miRNAs w/seed GUGGGGA)		mature microrna						0.0463	PXN
eqGranulocytes_IL8		miR-542-3p (miRNAs w/seed GUGACAG)		mature microrna						0.0463	ILK
eqGranulocytes_IL8		olomoucine		chemical - kinase inhibitor						0.0463	PCYT1A
eqGranulocytes_IL8		pyrrolidonecarboxylic acid		chemical - endogenous mammalian						0.0463	CYCS
eqGranulocytes_IL8		taspoglutide		biologic drug						0.0463	FABP5
eqGranulocytes_IL8		IL24		cytokine						0.0465	HSP90B1,HSPA5
eqGranulocytes_IL8		ATG7	-1.264	enzyme						0.0468	APOE,PLIN3,SET
eqGranulocytes_IL8		ciprofloxacin		chemical drug						0.0468	ATP5F1C,HSPD1,RAB11FIP1
eqGranulocytes_IL8		potassium chloride		chemical drug						0.0468	ATP1A1,HSP90B1,HSPA5
eqGranulocytes_IL8		MAP2K1	-1.054	kinase						0.0475	APOE,HSPA5,ITGA2B,THBS1
eqGranulocytes_IL8		OGT		enzyme						0.0478	DNM3,PSMC6,PSMD6
eqGranulocytes_IL8		EFNA5		kinase						0.0481	DSC1,FABP5
eqGranulocytes_IL8		PNPLA8		enzyme						0.0481	HSP90B1,HSPA5
eqGranulocytes_IL8		TXN	-1.353	enzyme						0.0481	MIF,RELA
eqGranulocytes_IL8		UBQLN2		other						0.0481	PSMC6,PSMD2
eqGranulocytes_IL8		cilostazol		chemical drug						0.0481	HSPA5,RELA
eqGranulocytes_IL8		mir-145		microrna						0.0481	DDX17,HSPD1
eqGranulocytes_IL8		Histone h3		group						0.0493	B2M,CD9,HSPA5,PSMA2,S100A9,SYNE2,UQCRC1
eqGranulocytes_IL8		Alpha catenin		group						0.0497	S100A9,WIPF1,ZYX
eqGranulocytes_IL8		GPX1	1.138	enzyme						0.0498	GLRX,RELA
eqGranulocytes_IL8		IRS2		enzyme						0.0498	GSK3A,RELA
eqGranulocytes_IL8		RAC2	1.59	enzyme						0.0498	MIF,ZYX
eqGranulocytes_IL8		ibrutinib		chemical drug	Activated	2		0.212	1.576	0.0542	COX6B1,HSPD1,HSPE1,RELA
eqGranulocytes_IL8		gentamicin		chemical drug	Inhibited	-2.219		-0.094	-2.011	0.0998	CD9,EPS15L1,HSP90B1,HSPA5,NUDC
eqGranulocytes_IL8		CST5		other	Activated	2		0.23	1.541	0.118	HNRNPA2B1,HNRNPC,HNRNPH1,RBM3
eqGranulocytes_IL8		metformin		chemical drug		1.934		0.154	1.636	0.134	HSPA5,ILK,MT-CO2,VWF
eqGranulocytes_IL8		Akt		group		-1.964		-0.146	-1.678	0.309	MPPE1,MT-CO2,RELA,THBS1
eqGranulocytes_IL8		ethanol		chemical - endogenous mammalian		-1.941		-0.161	-1.628	0.524	HSP90B1,HSPA5,RELA,SEC23A
Causal Networks for My Projects->eqGranulocytes_IL8
Master Regulator	Molecule Type	Expr Fold Change	Depth	Predicted Activation State	Notes	Activation z-score	p-value of overlap	Network bias-corrected p-value	Participating regulators	Target molecules in dataset	Causal network	Target-connected regulators	Relationships Between Master Regulators(Increases/Downstream)	Relationships Between Master Regulators(Decreases/Downstream)	Relationships Between Master Regulators(Affects/Downstream)	Relationships Between Master Regulators(Increases/Upstream)	Relationships Between Master Regulators(Decreases/Upstream)	Relationships Between Master Regulators(Affects/Upstream)	Relationships Between Master Regulators(Increases/Both)	Relationships Between Master Regulators(Decreases/Both)	Relationships Between Master Regulators(Affects/Both)
adenine-riboflavin dinucleotide	chemical - endogenous mammalian		3	Inhibited		-2.605	2.01e-17	0.0001	26s Proteasome,adenine-riboflavin dinucleotide,Akt,AKT1,CEBPA,CYBB,EGFR,ERN1,FBXW7,HIF1A,IKBKB,IRF3,JUN,KDM1A,MAPK1,mitomycin C,NFKBIA,Nos,NOS2,P38 MAPK,RB1,RELA,SMAD3,SYK,TP53,XBP1	AHCY,ALDOC,ATP5F1C,ATP5PO,CCT5,CD55,CDC42,CNN3,COX6B1,CYCS,DBI,ERP29,ERP44,FABP5,FCER1G,FKBP2,FKBP4,FUBP1,GLRX,GSK3A,HNRNPA2B1,HNRNPD,HNRNPH1,HNRNPM,HSP90B1,HSPD1,HSPE1,HUWE1,ILK,LASP1,LTB4R,MAPRE2,MIF,MMRN1,MPDU1,MPPE1,NAP1L4,NUCKS1,NUDC,OLR1,P4HB,PABPC1,PCYT1A,PDIA6,PPIA,PPIB,PRKAR2B,PSMD2,PSMD6,PXN,RAB8A,RBM3,RCSD1,RPL7,S100A9,SEC23A,SH3KBP1,SLC16A3,STK4,SYTL1,TAGLN2,TBCB,UQCRC1,WIPF1,ZYX	65 (26)	23				CYBB
estramustine	chemical drug		3			-0.697	4.08e-17	0.0003	AHR,Akt,AKT1,APP,Creb,CYP19A1,EGF,EGFR,ERK1/2,ESR1,ESR2,estramustine,GATA1,IGF1R,MAP2,MAPK1,NCOA3,NFkB (complex),P38 MAPK,RELA,SP1,STAT5B,tamoxifen,TP53	ACOT1,ACTB,AHCY,APOE,ATP5F1C,ATP5PO,B2M,CCT3,CCT5,CDC42,CNN3,CYCS,DBI,DNAJB1,DSC1,ERP29,FABP5,FCER1G,FKBP4,FUBP1,GNB1,GSK3A,HINT1,HNRNPA2B1,HNRNPD,HNRNPH1,HNRNPM,HSP90B1,HSPD1,HSPE1,ITGA2B,LTB4R,MAPRE2,MIF,MMP25,MMRN1,MPPE1,MYL12A,NAP1L4,NUDC,OLR1,P4HB,PCYT1A,PDIA6,PGLS,PLEK,PLIN3,PPIA,PPIB,PRKAR2B,PSMA2,PSMD2,PXN,RAB5B,RAB8A,RBM3,RELA,RNASEL,RPL7,S100A9,SAMD9,SLC16A3,SLC44A2,STK4,SYNCRIP,SYTL1,T…	74 (24)	23				ESR1	MAP2
RBFOX2	transcription regulator		3			0.229	1.46e-16	0.0003	AHR,Akt,AKT1,APP,Creb,CREB1,CYP19A1,EGF,EGFR,ERK1/2,ESR1,Esr1-Esr1-estrogen-estrogen,ESR2,estrogen,GATA1,IGF1R,MAPK1,NCOA3,NFkB (complex),P38 MAPK,PI3K (complex),RBFOX2,RELA,SP1,STAT5B,tamoxifen,TP53	ACOT1,ACTB,AHCY,APOE,ATP5F1C,ATP5PO,B2M,CCT3,CCT5,CDC42,CNN3,CYCS,DBI,DNAJB1,DSC1,ERP29,FABP5,FCER1G,FKBP4,FUBP1,GNB1,GSK3A,HINT1,HNRNPA2B1,HNRNPD,HNRNPH1,HNRNPM,HSP90B1,HSPD1,HSPE1,ITGA2B,LTB4R,MAPRE2,MIF,MMP25,MMRN1,MPPE1,MYL12A,NAP1L4,NUDC,OLR1,P4HB,PCYT1A,PDIA6,PGLS,PLEK,PLIN3,PPIA,PPIB,PRKAR2B,PSMA2,PSMD2,PXN,RAB5B,RAB8A,RBM3,RBMX,RELA,RNASEL,RPL7,S100A9,SAMD9,SH3KBP1,SLC16A3,SLC44A2,STK4,SY…	76 (27)	25					ESR1,Insulin,mir-34
Mir122a,b	group		3			0.216	2.6e-16	0.0005	AHR,BHLHE40,BIRC5,CASP3,CCND1,CDKN1A,CEBPA,E2F1,EGFR,EIF2AK3,ESR1,GLI1,HIF1A,HNF4A,IGF1R,IL6,JUNB,MAPK1,mir-122,Mir122a,b,MTOR,MYC,NFKBIA,PTEN,RELA,SP1,STAT3,STAT5a/b,TP53,TP73,TSC2	ACOT1,AHCY,APOE,ATP1A1,ATP5F1C,ATP5PO,AVIL,B2M,CCT3,CCT5,CD9,CDC42,CNN3,CYCS,DBI,DNAJB1,DPP7,DSC1,EIF3I,ERP29,FABP5,FKBP4,FUBP1,GLRX5,GNB1,GSK3A,GSTO1,HINT1,HNRNPD,HSP90B1,HSPA5,HSPD1,ILK,ITGA2B,LASP1,LTB4R,MAPRE2,MMRN1,MPDU1,MT-CO2,MYL12A,NAP1L4,NAPA,NUCKS1,NUDC,NUDT21,OLR1,P4HB,PABPC1,PDIA6,PGLS,PGP,PLEK,PLIN3,PPIA,PPIB,PSMA2,PSMD2,RAB43,RAB5B,RAB8A,RAB8B,RELA,RNASEL,RPL7,SAMD9,SEC23A,SEPTIN2,S…	86 (31)	30				cholesterol,TP53	GZMA
TP53RK	kinase		3			-1.789	2.61e-16	0.0003	AKT1,BHLHE40,BIRC5,CCND1,CDKN1A,CEBPA,CTNNB1,CXCL12,E2F1,EIF2AK3,ERBB2,GLI1,HIF1A,HNF4A,IGF1R,IL6,JUN,MAPK1,MMP14,MTOR,NANOG,NFKB1,NFKBIA,PPARG,RB1,RELA,TGFB1,TP53,TP53RK,TP73,TSC2	ACOT1,AHCY,ALDOC,APOE,ATP1A1,ATP5F1C,AVIL,CBFB,CCT5,CDC42,CNN3,CORO1C,COX6B1,DBI,DPP7,EIF3I,EIF4H,ERP29,FABP3,FABP5,FKBP2,FKBP4,FUBP1,GSK3A,GSTO1,HNRNPA2B1,HNRNPC,HNRNPD,HNRNPH1,HNRNPM,HSPA5,HSPD1,HSPE1,ILK,ITGA2B,KHSRP,LASP1,LTB4R,MAPRE2,MMRN1,MPDU1,MT-CO2,MYL12A,NAP1L4,NAPA,NUCKS1,NUDC,P4HB,PDE4D,PDIA6,PGP,PLEK,PLIN3,PPIA,PPIB,PSMA2,PSMD2,RAB8A,RAB8B,RBM3,RELA,RNASEL,RPL7,SEPTIN7,SET,SH3KBP1,SR…	80 (31)	29				TP53
ESR1	ligand-dependent nuclear receptor		2			-0.465	7.16e-16	0.0008	AHR,Akt,AKT1,APP,CREB1,CYP19A1,EGF,EGFR,ERK1/2,ESR1,ESR2,GATA1,IGF1R,MAPK1,NCOA3,NFkB (complex),P38 MAPK,PI3K (complex),RELA,SP1,STAT5B,tamoxifen,TP53	ACOT1,ACTB,AHCY,APOE,ATP5F1C,ATP5PO,B2M,CCT3,CCT5,CDC42,CNN3,CYCS,DBI,DNAJB1,DSC1,ERP29,FABP5,FKBP4,FUBP1,GNB1,GSK3A,HINT1,HNRNPA2B1,HNRNPD,HNRNPH1,HNRNPM,HSP90B1,HSPD1,HSPE1,ITGA2B,LTB4R,MAPRE2,MIF,MMP25,MMRN1,MPPE1,MYL12A,NAP1L4,NUDC,OLR1,P4HB,PCYT1A,PDIA6,PGLS,PLEK,PPIA,PPIB,PRKAR2B,PSMA2,PSMD2,PXN,RAB5B,RAB8A,RBM3,RBMX,RELA,RNASEL,RPL7,S100A9,SAMD9,SH3KBP1,SLC16A3,SLC44A2,STK4,SYNCRIP,SYTL1,T…	74 (23)	23	5-azacytidine,ABL1,ACTN2,apigenin,arsenic,arsenite,benomyl,bisphenol A,bortezomib,C8orf44-SGK3/SGK3,cadmium,CCN2,celecoxib,CSNK2A2,DDX5,DNA-PK,estramustine,GSK-2606414,Insulin,MTOR,naringenin,naringin,PI3K (family),PLK1,POU2F1,PPM1D,RBCK1,S-equol,simvastatin,SMARCA2,STK11,USP35,WT1,XBP1,Z-LLL-CHO	BARD1,cobalt,CSNK1G2,F2R,GnRH analog,HEXIM1,IFI16,mir-1,miR-1-3p (and other miRNAs w/seed GGAAUGU),RBFOX2,RHOA,thapsigargin,TXN,UBE2D2,vanadate		ADORA1,AURKA,BCL6,BIRC5,BUB1,BUB1B,BUB3,CCNB1,CEBPD,CHEK1,DST,DYRK2,FSH,GIT2,glutathione peroxidase,HEY1,HIF1A,ID1,INCENP,LATS2,LGALS1,MAP2,MUC5AC,NEK1,NSD1,OPA1,OXT,PPM1B,PRKACB,PTPN4,PTTG1,RPS6KB1,SFPQ,SKP2,SLC7A5,TGM2,thymidine kinase,TNFSF10,TTK,UHMK1,VPS35	ACKR3,ALOX5,APP,BCR-ABL1,CASP8AP2,CBL,CGA,CHEK2,cholesterol,D-glucose,DDIT4,DNM2,EDN1,ERBB4,ETS,FARP2,HTRA2,ITGA2B,JUN,KISS1R,MAPK12,mir-515,NFKB1,NQO1,NRF1,PSMD3,RICTOR,SP4,SPG7,TERF2,TXNIP
Hif	complex		3			-1.756	9.5e-16	0.0005	Akt,ARNT,CDK2,CDKN1A,EGFR,EIF4EBP1,EPAS1,ESR1,ESR2,Hif,HIF1A,HIF3A,Hsp90,IGF1R,IL1B,JUN,MYC,NFKB1,Nos,PPARG,PTEN,RELA,Smad2/3,STAT3,TP53,VEGFA	ACTB,AHCY,ALDOC,APOE,ATP1A1,ATP5F1C,ATP5PO,CBFB,CCT3,CCT5,CD55,CNN3,COX6B1,CYCS,DNAJB1,DSC1,FABP3,FCER1G,FKBP4,FUBP1,GLRX5,GNB1,GSK3A,GSTO1,HNRNPD,HNRNPH1,HSPA5,HSPD1,HSPE1,HUWE1,ILK,ITGA2B,KHSRP,LASP1,MAPRE2,MIF,MPPE1,MYL12A,NAP1L4,NUCKS1,NUDC,NUDT21,OLR1,P4HB,PABPC1,PCYT1A,PDIA6,PGLS,PPIA,PRKAR2B,PSMD2,PXN,RAB43,RAB5B,RAB8A,RBM3,RELA,S100A9,SAMD9,SEC23A,SET,SH3KBP1,SLC16A3,SLC44A2,SYTL1,TES,THB…	73 (26)	24				PDGF (family),TF	reactive oxygen species
CYBB	enzyme	1.883	2	Inhibited		-3.576	1.24e-15	0.0002	Akt,AKT1,CYBB,EGFR,ERN1,IKBKB,IRF3,JUN,MAPK1,NFKBIA,P38 MAPK,RELA,SYK,TP53,XBP1	ACTB,AHCY,ATP1A1,ATP5F1C,CCT5,CD55,CNN3,CYCS,DBI,ERP29,ERP44,FABP5,FCER1G,FKBP2,FKBP4,FUBP1,GSK3A,HNRNPA2B1,HNRNPD,HNRNPH1,HNRNPM,HSP90B1,HSPD1,HSPE1,ILK,LASP1,LTB4R,MAPRE2,MIF,MPDU1,MPPE1,NAP1L4,NUDC,OLR1,P4HB,PABPC1,PCYT1A,PDIA6,PPIA,PPIB,PRKAR2B,PSMD2,PXN,RAB8A,RBM3,RCSD1,RPL7,SEC23A,SH3KBP1,STK4,SYTL1,TAGLN2,TBCB,UBE2I,UQCRC1,WIPF1,ZYX	57 (15)	14	5-hydroxytryptamine,7-ketocholesterol,adenine-riboflavin dinucleotide,aldosterone,ANGPT2,APP,BHLHE40,D-glucose,DNMT3A,EDN1,F2,PRKCA,puromycin aminonucleoside	APOA1,IL13,mycophenolic acid,N-acetyl-L-cysteine,PTPN11,simvastatin		CCN2,EGFR,EIF2A,ERN1,IL5,reactive oxygen species,TP53,XBP1	JUN
LINC01139	other		3			-1.016	2.17e-15	0.0002	Akt,CDK2,CDKN1A,EGFR,EIF4EBP1,ERBB3,HIF1A,IGF1R,IL1B,JUN,LINC01139,NFKB1,Nos,PPARG,PTEN,PTK6,RELA,Smad2/3,TP53,VEGFA	ACTB,AHCY,ALDOC,APOE,ATP1A1,ATP5F1C,ATP5PO,CBFB,CCT5,CD55,CDC42,CNN3,COX6B1,CYCS,FABP3,FKBP4,FUBP1,GSK3A,GSTO1,HNRNPD,HNRNPH1,HSPA5,HSPD1,HSPE1,HUWE1,ILK,ITGA2B,KHSRP,LASP1,LTB4R,MAPRE2,MIF,MPPE1,NAP1L4,NUCKS1,NUDC,OLR1,P4HB,PABPC1,PCYT1A,PDIA6,PPIA,PRKAR2B,PSMD2,PXN,RAB43,RAB8A,RBM3,RELA,RPL7,S100A9,SEC23A,SET,SH3KBP1,SLC16A3,STK4,SYNCRIP,SYTL1,THBS1,UQCRC1,USO1,ZYX	62 (20)	19				BHLHE40,HIF1A,PKM
CG-806	chemical drug		3			0.775	3.89e-15	0.0005	BTK,CG-806,ERK1/2,FLT3,IDH2,IKBKB,IKBKG,IKZF1,JAK2,JUN,MAPK1,MAPK8,MAPK9,MTOR,NFkB (complex),NFKB1,NFKB2,NFKBIA,P38 MAPK,PI3K (complex),PLCG1,PRKCA,PRKCB,SIRT3,STAT5a/b,STAT5B,SYK,TLR3,TP53	ACOT1,AHCY,ALDOC,ATP1A1,ATP5F1C,AVIL,B2M,CNN3,CTSZ,CYCS,DBI,DNM3,ERP29,FABP5,FCER1G,FKBP4,FUBP1,GLRX3,GSK3A,HINT1,HNRNPA2B1,HSP90B1,HSPD1,ILK,KHSRP,LASP1,LTB4R,MAPRE2,MIF,MMRN1,MPDU1,MT-CO2,NAP1L4,OLR1,P4HB,PDIA6,PEBP1,PGP,PPIA,PPIB,PRKAR2B,PSMD2,PXN,RAB8A,RBM3,RCSD1,RELA,RPL7,S100A9,SET,SLC16A3,SYTL1,TAGLN2,TUBB1,UBE2I,UQCRC1,USO1,VWF,WIPF1,ZYX	60 (29)	27					BTK
bivalirudin	biologic drug		3	Activated		3.732	5.7e-15	0.0004	ADCY,AKT1,ATF1,bivalirudin,Ca2+,Creb,CREB1,EGFR,ERK,F2,F2R,F5,FN1,IKBKB,JAK2,JUN,MAPK1,Mek,MYC,NFkB (complex),NFKB1,NFKBIA,PAK2,PI3K (complex),PIK3R1,PLG,Rap1,RASSF5,RELA,RGS18,RHOA,SEPTIN5,SNAP23,SRC (family),SRF,STIM1,STK11,SYK,TAZ,TGFB1,VEGFA,YAP1	AHCY,ATP1A1,ATP5F1C,ATP5PO,AVIL,CBFB,CCT3,CCT5,CD55,CNN3,CORO1C,COX6B1,CTSZ,CYCS,DBI,EIF4H,ERP29,FABP5,FKBP2,FUBP1,GLRX5,GSK3A,GSTO1,HINT1,HNRNPC,HNRNPD,HNRNPH1,HNRNPM,HSP90B1,HSPD1,HSPE1,ITGA2B,KHSRP,LASP1,MIF,MMP25,MMRN1,MPDU1,MYL12A,NUDC,NUDT21,PABPC1,PDE4D,PEBP1,PLIN3,PPIA,PRKAR2B,PSMD6,RBM3,RBMX,RCSD1,RELA,SEPTIN2,SEPTIN7,SET,SLC16A3,SRI,STK4,SYTL1,TAGLN2,TES,THBS1,TMOD3,TREML1,TUBB1,U2AF1/U…	69 (42)	40					F2,F2R
SPN	transmembrane receptor	2.429	3	Inhibited		-2.4	6.29e-15	0.0013	Akt,AKT1,BHLHE40,BIRC5,CCND1,CD247,CDKN1A,CEBPA,CTNNB1,E2F1,EGF,EGFR,EIF2AK3,ERBB2,Erm,GLI1,HIF1A,HNF4A,IGF1R,IL6,MAPK1,Mmp,MMP3,MTOR,NANOG,NFKB1,NFKBIA,Pka,PPARG,RB1,RELA,SPN,STAT3,SYK,TGFB1,TNF,TP53,TP73,TSC2	ACOT1,AHCY,ALDOC,APOE,ATP1A1,ATP5F1C,AVIL,CBFB,CCT5,CD9,CDC42,CNN3,CORO1C,COX6B1,DBI,DPP7,EIF3I,EIF4H,ERP29,FABP3,FABP5,FCER1G,FKBP2,FKBP4,FUBP1,GSK3A,GSTO1,HNRNPC,HNRNPD,HNRNPH1,HNRNPM,HSPA5,HSPD1,ILK,ITGA2B,KHSRP,LASP1,LTB4R,MAPRE2,MMRN1,MPDU1,MPPE1,MT-CO2,MYL12A,NAP1L4,NAPA,NUCKS1,NUDC,NUDT21,P4HB,PABPC1,PDE4D,PDIA6,PGP,PLEK,PLIN3,PPIB,PSMD2,RAB8A,RAB8B,RBM3,RCSD1,RELA,RNASEL,RPL7,SAMD9,SET,SH…	84 (39)	36	F2,IL4,IL5,rosiglitazone	geldanamycin		CD247,TP53
EPHA3	kinase		3			0.985	6.87e-15	0.0001	AKT1,AR,CBL,CD247,Cdc42,CHUK,COPS5,EFNA2,EGFR,EIF2AK3,EPHA3,ERBB2,FLT1,HRAS,IGF1R,JAK2,MAPK8,Metalloprotease,MMP11,MMP3,MRTFA,MTOR,NFkB (complex),NFKB1,PPARG,PRKCA,RELA,RET,RHOA,SRF,STAT5a/b,SYK,Tgf beta,TGFB1,TP53,ZAP70	ACTB,AHCY,APRT,ATP1A1,ATP5F1C,ATP5PO,ATP6AP1,AVIL,CBFB,CCT3,CCT5,CD55,CNN3,CORO1C,COX6B1,CTSZ,DBI,DSC1,EIF4H,FABP3,FABP5,FKBP2,FUBP1,GNB1,HINT1,HNRNPC,HNRNPH1,HNRNPM,HSPD1,HSPE1,KHSRP,LTB4R,MAPRE2,MIF,MYL12A,NAP1L4,NAPA,NUDC,NUDT21,P4HB,PABPC1,PCYT1A,PDE4D,PDIA6,PGP,PLIN3,PPIA,PPIB,PSMD2,PXN,RAB8A,RBM3,RCSD1,RNASEL,RPL7,SET,SH3KBP1,SLC16A3,SRI,STK4,SYNCRIP,SYTL1,TAGLN2,TNPO2,TUBB1,VPS4B	66 (36)	33				CBL,EFNA2,RHOA
KRP-203	chemical drug		3	Activated		3.098	8.39e-15	0.0008	ALOX5,ARG1,EIF2AK3,ERK,ERK1/2,KRP-203,MYC,P38 MAPK,PPARG,S1PR,SMAD3,TGFB1,TP53	ACTB,ATP1A1,ATP5F1C,ATP5PO,B2M,CBFB,CCT3,CCT5,CD55,CD9,CNN3,CORO1C,COX6B1,CYCS,DBI,EIF4H,FABP3,FABP5,FCER1G,FKBP2,FKBP4,FUBP1,GLRX5,GSK3A,HINT1,HNRNPA2B1,HNRNPC,HNRNPD,HNRNPH1,HSP90B1,HSPE1,LASP1,LTB4R,MAPRE2,MIF,MT-CO2,MYL12A,NAP1L4,NAPA,NUDT21,OLR1,P4HB,PDE4D,PDIA6,PLIN3,PPIA,PSMD2,PXN,RAB8A,RBM3,RNASEL,RPL7,SLC16A3,SRI,TES,THBS1,TMOD3,UBE2I,UQCRC1,USO1	60 (13)	10					ALOX5
TXN	enzyme	-1.353	2			0.687	1.02e-14	0.0001	CASP8,EGFR,ERK1/2,GAPDH,HIF1A,JAK2,NFkB (complex),NFKB1,NFKBIA,Nos,P38 MAPK,PARP1,SMAD3,TP53,TXN	ACTB,AHCY,ALDOC,ATP1A1,ATP5F1C,ATP5PO,B2M,CCT5,CD55,CNN3,CTSZ,DBI,FABP5,FCER1G,FKBP4,FUBP1,GSK3A,HNRNPA2B1,HNRNPD,HNRNPH1,HSPD1,HSPE1,HUWE1,ILK,KHSRP,LASP1,LTB4R,MAPRE2,MIF,MPDU1,NAP1L4,NUCKS1,NUDC,OLR1,P4HB,PABPC1,PDIA6,PRKAR2B,PSMD2,PXN,RAB8A,RBM3,RELA,RPL7,S100A9,SET,SLC16A3,SYTL1,TAGLN2,TMOD3,UQCRC1,USO1,ZYX	53 (15)	15	1,2-dithiol-3-thione,HSF2,lactacystin,PARK7,SMAD7,vorinostat,XBP1,Z-LLL-CHO	cadmium,CD 437,GPX4,GPX5,Immunoglobulin,N-acetyl-L-cysteine,ST1926,TXNIP		BCL6,PRDX5,TP53	APOA1,EGFR,ESR1,MUC5AC,NFKB1,thiol
ulinastatin	chemical drug		3	Activated		3.825	1.04e-14	0.0016	ADCY,Akt,AKT1,ATF1,C5,Ca2+,CREB1,EGFR,ELANE,elastase,ERK,ETS,F2,F5,FN1,IKBKB,JAK2,JUN,Kallikrein,lipase,LIPE,MAPK1,MYC,NFkB (complex),NFKB1,NFKBIA,PAK2,PI3K (complex),PLCG1,PLG,RELA,RGS18,RHOA,SEPTIN5,SNAP23,SRC (family),SRF,STIM1,STK11,SYK,TGFB1,ulinastatin,VEGFA	AHCY,ALDOC,ATP1A1,ATP5F1C,ATP5PO,AVIL,CBFB,CCT3,CCT5,CD55,CNN3,CORO1C,COX6B1,CTSZ,CYCS,DBI,EIF4H,ERP29,FABP5,FKBP2,FUBP1,GLRX5,GSK3A,GSTO1,HINT1,HNRNPC,HNRNPD,HNRNPH1,HNRNPM,HSP90B1,HSPD1,HSPE1,ITGA2B,KHSRP,LASP1,LTB4R,MIF,MMRN1,MPDU1,MPPE1,MYL12A,NUDC,NUDT21,PABPC1,PDE4D,PEBP1,PLIN3,PPIA,PRKAR2B,RBM3,RBMX,RCSD1,RELA,SEPTIN2,SEPTIN7,SET,SF1,SLC16A3,SRI,STK4,SYTL1,TAGLN2,TES,THBS1,TMOD3,TREML1,TUB…	70 (43)	39					elastase,F2
USP37	peptidase		3			-0.232	1.07e-14	0.001	AKT1,AMPK,ATF4,BAK1,BAX,BID,CCND1,CDK4/6,CDKN1A,CDKN1B,CEBPB,CREB1,E2F1,EIF2AK3,ERK,estrogen receptor,F2,FOS,GCK,GLI1,Histone h3,HRAS,HSF1,MYC,NFKBIA,Pka,PTEN,RARA,RELA,RUVBL1,SP1,STAT3,TP73,tretinoin,USP37	ACTB,AHCY,ATP1B3,ATP5F1C,B2M,CBFB,CCT3,CDC42,CORO1C,COX6B1,CTSZ,CYCS,DBI,DNAJB1,DSC1,EIF3I,ERP29,FABP5,GLRX5,GNB1,GSTO1,HINT1,HNRNPA2B1,HNRNPC,HNRNPD,HNRNPH1,HNRNPM,HSPA5,HSPD1,HSPE1,HUWE1,ILK,ITGA2B,LASP1,MAPRE2,MIF,MPDU1,MT-CO2,NAPA,NUCKS1,NUDC,NUDT21,OLR1,P4HB,PDE4D,PDIA6,PGLS,PLEK,PPIA,PRKAR2B,PSMA2,PSMD2,RAB43,RAB8B,RBMX,RNASEL,RPL7,S100A9,SAMD9,SEC23A,SH3KBP1,SLC16A3,STK4,SYNCRIP,SYNE2,SYTL…	74 (35)	33
DNAJB1	transcription regulator	-1.554	3			-1.812	1.28e-14	0.0024	26s Proteasome,AKT1,BHLHE40,BIRC5,CASP3,CASP9,CD40,CDKN1A,CEBPA,CEBPB,CTNNB1,DNAJB1,E2F1,EIF2AK3,ERBB2,GLI1,HIF1A,HNF4A,HSF1,Hsp70,IGF1R,IL18,MTOR,NANOG,NFKB1,NFKBIA,PARP1,PPARG,PTEN,RB1,RELA,SNAI2,SP1,STAT3,STUB1,TLR2,TP53,TSC2	ACOT1,AHCY,ALDOC,APOE,ATP1A1,ATP5F1C,AVIL,B2M,CCT3,CCT5,CD9,CDC42,CNN3,COX6B1,DBI,DNM3,DPP7,EIF3I,FABP3,FABP5,FKBP4,FUBP1,GSK3A,GSTO1,HINT1,HNRNPA2B1,HNRNPD,HNRNPM,HSPA5,HSPD1,HSPE1,ILK,ITGA2B,KHSRP,LASP1,LTB4R,MAPRE2,MMRN1,MPDU1,MT-CO2,NAP1L4,NAPA,NUCKS1,NUDC,NUDT21,P4HB,PDIA6,PGP,PLIN3,PPIA,PPIB,PSMA2,PSMD2,PSMD6,RAB43,RAB8A,RAB8B,RBM3,RELA,RNASEL,RPL7,SEC23A,SET,SH3KBP1,SRI,STK4,SYNCRIP,SYTL1,…	78 (38)	34	bortezomib,curcumin,DNMT3B,geldanamycin,monorden,tanespimycin	AHR,miR-1-3p (and other miRNAs w/seed GGAAUGU),miR-155-3p (miRNAs w/seed UCCUACC)		TP53	reactive oxygen species
YY1	transcription regulator		3	Activated		2.038	1.79e-14	0.001	Ap2,ATF4,BHLHE40,BIRC5,calcitriol,CDKN1B,CEBPA,CREB1,CTNNB1,E2F1,EIF2AK3,ERBB2,F2,GLI1,HNF4A,HOXA9,HRAS,HSF1,IGF1R,IL6,MAP3K7,MTOR,MYC,NANOG,NFKB1,PPARG,PTEN,Smad2/3,SMAD7,TP53,TP73,TSC2,VitaminD3-VDR-RXR,YY1	ACOT1,ACTB,APOE,ATP1A1,ATP5F1C,AVIL,B2M,CBFB,CCT3,CDC42,CNN3,CORO1C,COX6B1,CYCS,DBI,DNAJB1,DPP7,EIF3I,ERP29,FABP3,FABP5,FKBP4,FUBP1,GLRX3,GLRX5,GNB1,GSK3A,HNRNPA2B1,HNRNPD,HNRNPH1,HSPA5,HSPE1,ILK,ITGA2B,KHSRP,LASP1,LTB4R,MAPRE2,MIF,MMRN1,MT-CO2,NAP1L4,NAPA,NUDT21,OLR1,P4HB,PDIA6,PGP,PLEK,PLIN3,PPIA,PPIB,PSMA2,PSMD2,RAB11FIP1,RAB1B,RAB43,RAB8A,RAB8B,RBM3,RBMX,RELA,RNASEL,RPL7,S100A9,SEC23A,SET,SLC…	78 (34)	31	CD3,PLK1	manganese chloride,salinosporamide A		DDIT4,EDN1,EGFR,GBP1,HIF1A,IL4,SMAD7	Ap2,CIITA,HEY1,TP53
trichosanthin	chemical drug		3	Inhibited		-2.849	1.95e-14	0.0013	AKT1,BAX,BHLHE40,BIRC5,CCND1,CCR2,CCR5,CDKN1A,CEBPA,CXCR4,cyclic AMP,E2F1,EGF,EGFR,EIF2AK3,G protein,GLI1,GNG13,GNG7,IL6,IRF3,JAK2,MTOR,NANOG,NFKB1,NFKBIA,PDK1,PTEN,RB1,RELA,STAT5B,TGFB1,TP53,TP73,trichosanthin,TSC2,ZAP70	AHCY,APOE,ATP1A1,ATP5F1C,AVIL,CBFB,CCT5,CD9,CNN3,CORO1C,COX6B1,DBI,DPP7,EIF3I,EIF4H,FABP5,FKBP2,FKBP4,FUBP1,GNB1,GSK3A,GSTO1,HNRNPC,HNRNPD,HNRNPH1,HNRNPM,HSPA5,HSPD1,HSPE1,ILK,ITGA2B,KHSRP,LASP1,LTB4R,MAPRE2,MMRN1,MPDU1,MT-CO2,MYL12A,NAP1L4,NAPA,NUDC,P4HB,PABPC1,PDE4D,PDIA6,PGP,PLEK,PPIB,PSMA2,PSMD2,RAB43,RAB8A,RAB8B,RBM3,RELA,RNASEL,RPL7,SEC23A,SET,SH3KBP1,SLC44A2,SRI,STK4,SYNCRIP,SYNE2,SYTL1,TA…	77 (37)	35				CXCR4,TP53
Mir122a,b	group		2			0.447	2.18e-14	0.0001	IGF1R,mir-122,Mir122a,b,RELA,TP53	AHCY,APOE,ATP1A1,ATP5F1C,ATP5PO,B2M,CDC42,CNN3,CYCS,DBI,FABP5,FKBP4,FUBP1,GSK3A,HSP90B1,HSPA5,HSPD1,ILK,ITGA2B,LASP1,LTB4R,MAPRE2,MT-CO2,NAP1L4,NUDC,OLR1,P4HB,PDIA6,PLIN3,PSMD2,RAB8A,RELA,RPL7,SEPTIN2,SEPTIN9,SH3KBP1,STK4,SYTL1,TAGLN2,THBS1,TNPO2,UQCRC1,USO1,VPS4B,ZYX	45 (5)	5				cholesterol,TP53	GZMA
NEK2	kinase	-1.307	3			-1.606	2.24e-14	0.0023	AKT1,BHLHE40,BIRC5,CDC20,CDKN1A,CEBPA,CTNNB1,CXCL12,EIF2AK3,ERBB2,GLI1,HIF1A,HNF4A,IGF1R,IL6,JUN,MAPK1,MMP14,MTOR,NANOG,NEK2,NFKB1,NFKBIA,PPARG,RB1,RELA,TGFB1,TP53,TP73,TSC2	ACOT1,AHCY,ALDOC,APOE,ATP1A1,ATP5F1C,AVIL,CBFB,CCT5,CDC42,CNN3,CORO1C,COX6B1,DBI,DPP7,EIF4H,ERP29,FABP3,FABP5,FKBP2,FKBP4,FUBP1,GSK3A,GSTO1,HNRNPA2B1,HNRNPC,HNRNPD,HNRNPH1,HNRNPM,HSPA5,HSPD1,ILK,ITGA2B,KHSRP,LASP1,LTB4R,MAPRE2,MMRN1,MPDU1,MT-CO2,MYL12A,NAP1L4,NAPA,NUCKS1,P4HB,PDE4D,PDIA6,PGP,PLEK,PLIN3,PPIA,PPIB,PSMA2,PSMD2,RAB8A,RAB8B,RBM3,RELA,RNASEL,RPL7,SEPTIN7,SET,SH3KBP1,SRI,STK4,SYNE2,SYTL…	76 (30)	27	COPS5,docetaxel,IL5,RABL6				CDC20
CYM50358	chemical reagent		3	Activated		3.402	3.44e-14	0.0011	Akt,ALOX5,ARG1,BAX,CASP3,CASP8,CDK2,CYM50358,DICER1,EIF2AK3,IL18,MYC,P38 MAPK,PARP1,PPARG,PTEN,TGFB1,TP53	ACTB,ATP1A1,ATP5F1C,ATP5PO,CBFB,CCT3,CCT5,CD55,CD9,CNN3,CORO1C,COX6B1,CYCS,DBI,EIF4H,FABP3,FABP5,FCER1G,FKBP2,FKBP4,GLRX5,GSK3A,HINT1,HNRNPA2B1,HNRNPC,HNRNPD,HNRNPH1,HSPE1,LASP1,LTB4R,MAPRE2,MIF,MPPE1,MYL12A,NAP1L4,NAPA,NUDT21,OLR1,P4HB,PCYT1A,PDE4D,PDIA6,PLIN3,PPIA,PSMD2,PXN,RAB43,RAB8A,RBM3,RNASEL,RPL7,S100A9,SEC23A,SET,SLC16A3,SRI,SYNCRIP,TES,TMOD3,UBE2I,UQCRC1,USO1,ZYX	63 (18)	15					ALOX5
Hoxb3os	transcription regulator		3			1.116	3.78e-14	0.001	Akt,AKT1,EIF4EBP1,ESR1,HIF1A,Hoxb3os,HSF1,IRS2,JAK2,MTOR,MYC,NFkB (complex),NFKB1,NR3C1,PRKCA,RICTOR,RPS6,STAT5a/b,TP53	ACTB,ALDOC,ATP1A1,ATP5PO,ATP6AP1,AVIL,CCT5,CD55,CDC42,CNN3,CYCS,DBI,DNAJB1,DSC1,FABP5,FUBP1,GLRX5,GNB1,GSK3A,HNRNPD,HNRNPH1,HNRNPM,HSP90B1,HSPD1,HSPE1,HUWE1,ILK,KHSRP,LTB4R,MAPRE2,MIF,MPPE1,NAP1L4,NUCKS1,NUDT21,OLR1,P4HB,PDIA6,PGLS,PGP,PPIA,PPIB,PRKAR2B,PSMA2,PSMC6,PSMD2,PSMD6,PXN,RAB5B,RAB8A,RBM3,RELA,S100A9,SAMD9,SET,SLC16A3,SLC44A2,SYTL1,TES,TMOD3,TUBB1,UBE2I,UQCRC1,USO1,VWF	65 (19)	17					MTOR
SKI-G-801	chemical drug		3	Activated		3.16	4.12e-14	0.0015	AKT1,ATF4,AURKB,AXL,BIRC5,CDKN1B,CHUK,Creb,CSF1,CSF1R,CTNNB1,EGFR,EIF4E,ERBB2,ERBB3,ESR1,FGF2,FGFR1,FGFR2,FLT1,FLT3,HRAS,HSF1,IDH2,JUN,JUNB,MAPK1,MERTK,MTOR,MYC,NFE2L2,NFkB (complex),NFKBIA,PI3K (complex),PKM,RASSF1,RB1,RET,SIRT3,SKI-G-801,SRC (family),STAT5a/b,STAT5B,TLR3,TP53,TP73,YAP1	ACOT1,ACTB,AHCY,ATP1A1,ATP5F1C,ATP5PO,AVIL,CBFB,CCT5,CDC42,CNN3,COX6B1,CTSZ,CYCS,DBI,DNAJB1,DSC1,FABP5,FKBP4,FUBP1,GLRX3,GLRX5,GSK3A,GSTO1,HINT1,HNRNPD,HNRNPH1,HNRNPM,HSP90B1,HSPA5,HSPD1,HSPE1,ILK,LASP1,LTB4R,MMP25,MMRN1,MPDU1,MYL12A,NAP1L4,NAPA,NUDC,NUDT21,PABPC1,PCYT1A,PDIA6,PEBP1,PGLS,PGP,PLIN3,PPIA,PRKAR2B,PSMD2,PXN,RAB5B,RAB8A,RBM3,RELA,RPL7,S100A9,SAMD9,SEC23A,SLC44A2,STK4,SYNE2,TAGLN2,TES,…	73 (47)	41					FLT1
miR-378a-3p (and other miRNAs w/seed CUGGACU)	mature microRNA		3			1.083	4.42e-14	0.0017	Akt,AKT1,BAX,CASP3,CDK2,DICER1,EIF4E,ESR1,HIF1A,HSF1,IL18,IRS2,JAK2,miR-378a-3p (and other miRNAs w/seed CUGGACU),MTOR,MYC,NFkB (complex),NFKB1,PARP1,PRKCA,PTEN,RICTOR,SIRT1,STAT3,STAT5a/b,TP53	ACTB,ALDOC,ATP1A1,ATP5PO,ATP6AP1,AVIL,CCT5,CD55,CD9,CDC42,CNN3,CTSZ,CYCS,DBI,DNAJB1,DSC1,FABP5,GLRX5,GNB1,GSK3A,HNRNPD,HNRNPH1,HNRNPM,HSP90B1,HSPE1,HUWE1,ILK,KHSRP,LTB4R,MAPRE2,MIF,MPPE1,NAP1L4,NUCKS1,NUDT21,OLR1,P4HB,PCYT1A,PDIA6,PGLS,PGP,PPIA,PPIB,PRKAR2B,PSMA2,PSMC6,PSMD2,PSMD6,PXN,RAB43,RAB5B,RAB8A,RBM3,RELA,SAMD9,SEC23A,SET,SLC16A3,SLC44A2,SYNCRIP,SYTL1,TES,TMOD3,TUBB1,UBE2I,UQCRC1,USO1,VWF,…	69 (26)	24		4-hydroxynonenal,ALOX5,TP53			MTOR
TSC22D1	transcription regulator		3	Inhibited		-2.038	4.61e-14	0.0015	AKT1,AR,BHLHE40,BIRC5,BRCA1,CCN2,CCND1,CDKN1A,CEBPA,Creb,CTNNB1,E2F1,EGFR,EIF2AK3,ERBB2,ERN1,GLI1,HIF1A,IGF1R,IL6,NANOG,NFKB1,NFKBIA,PPARG,PPARGC1A,RELA,SMAD2,Smad2/3,SMAD3,STK11,TGFB1,TGFBR1,TGM2,TP53,TP73,TSC2,TSC22D1,YAP1	AHCY,ALDOC,APOE,ATP1A1,ATP1B3,ATP5F1C,ATP6AP1,CBFB,CCT3,CCT5,CDC42,CNN3,CORO1C,DBI,DPP7,EIF3I,EIF4H,FABP3,FABP5,FKBP2,FKBP4,FUBP1,GSK3A,GSTO1,HNRNPC,HNRNPD,HNRNPH1,HNRNPM,HSP90B1,HSPD1,HSPE1,ILK,ITGA2B,KHSRP,LASP1,LTB4R,MAPRE2,MMP25,MMRN1,MPDU1,MT-CO2,MYL12A,NAP1L4,NAPA,NUCKS1,NUDC,P4HB,PABPC1,PDE4D,PDIA6,PLEK,PLIN3,PPIA,PSMA2,PSMD2,RAB8A,RAB8B,RBM3,RELA,RNASEL,RPL7,SET,SH3KBP1,SRI,STK4,SYNE2,SYT…	78 (38)	37	ADCYAP1,metribolone,rosiglitazone,TBK1,WT1	5-fluorouracil,CD28,DNMT3A,PRL,TCR		FN1,TP53
FBXL7	enzyme		3	Activated		2.032	4.88e-14	0.0022	Akt,BAX,BIRC5,c-Src,CASP8,CDK2,EGFR,EP300,ERBB2,FBXL7,HNF4A,IGF1R,IRF4,ITGB3,MYC,NFkB (complex),RB1,SP1,STAT3,TP53,VEGFA	ACOT1,AHCY,ALDOC,ATP1A1,ATP5F1C,ATP5PO,B2M,CBFB,CCT3,CCT5,CD55,CD9,CNN3,CTSZ,CYCS,FKBP4,FUBP1,GLRX5,GSK3A,HINT1,HNRNPA2B1,HNRNPD,HNRNPH1,HSP90B1,HSPA5,HSPD1,HSPE1,ILK,ITGA2B,LASP1,LTB4R,MAPRE2,MIF,MPPE1,NAP1L4,NUDC,NUDT21,OLR1,P4HB,PABPC1,PCYT1A,PDIA6,PPIA,PPIB,PSMA2,PSMD2,PXN,RAB8A,RBM3,S100A9,SET,SH3KBP1,SLC16A3,STK4,TAGLN2,TES,TUBB1,UBE2I,USO1,VWF,WIPF1,ZYX	62 (21)	19					BIRC5
Arnt-Hif1a	complex		3			-1.1	5.12e-14	0.0015	Akt,ARNT,Arnt-Hif1a,CDK2,CDKN1A,EIF4EBP1,ESR1,ESR2,HIF1A,Hsp90,IL1B,JUN,NFKB1,Nos,PPARG,PTEN,RELA,Smad2/3,STAT3,TP53,VEGFA	AHCY,ALDOC,APOE,ATP1A1,ATP5F1C,ATP5PO,CBFB,CCT3,CD55,CDC42,CNN3,COX6B1,CYCS,DNAJB1,DSC1,FABP3,FCER1G,FKBP4,FUBP1,GNB1,GSK3A,GSTO1,HNRNPD,HSPA5,HSPD1,HUWE1,ILK,ITGA2B,KHSRP,LASP1,MAPRE2,MIF,MPPE1,MYL12A,NAP1L4,NUCKS1,OLR1,P4HB,PABPC1,PCYT1A,PDIA6,PGLS,PPIA,PRKAR2B,PSMD2,PXN,RAB43,RAB5B,RAB8A,RBM3,RELA,RPL7,S100A9,SAMD9,SEC23A,SET,SH3KBP1,SLC16A3,SLC44A2,SYTL1,THBS1,TMOD3,UBE2I,UQCRC1,USO1,WIPF1,ZYX	67 (21)	20
valinomycin	chemical reagent		3			1.083	5.24e-14	0.0022	Akt,AKT1,BAX,CASP3,CDK2,DICER1,EIF4E,ESR1,HIF1A,HSF1,IL18,IRS2,JAK2,MTOR,MYC,NFkB (complex),NFKB1,PARP1,PRKCA,PTEN,RICTOR,SIRT1,STAT3,STAT5a/b,TP53,valinomycin	ACTB,ALDOC,ATP1A1,ATP5PO,ATP6AP1,AVIL,CCT5,CD55,CD9,CDC42,CNN3,CTSZ,CYCS,DBI,DNAJB1,DSC1,FABP5,GLRX5,GNB1,GSK3A,HNRNPD,HNRNPH1,HNRNPM,HSP90B1,HSPE1,HUWE1,ILK,KHSRP,LTB4R,MAPRE2,MIF,MPPE1,NAP1L4,NUCKS1,NUDT21,OLR1,P4HB,PCYT1A,PDIA6,PGLS,PGP,PPIA,PPIB,PRKAR2B,PSMA2,PSMC6,PSMD2,PSMD6,PXN,RAB43,RAB5B,RAB8A,RBM3,RELA,SAMD9,SEC23A,SET,SLC16A3,SLC44A2,SYNCRIP,SYTL1,TES,TMOD3,TUBB1,UBE2I,UQCRC1,USO1,VWF,…	69 (26)	24					MTOR,reactive oxygen species
CIITA	transcription regulator		3	Activated		3.16	5.43e-14	0.0025	Akt,AKT1,ARG1,BAX,CIITA,EGFR,GATA1,GPX4,HISTONE,IFNG,Ige,IKBKB,IKZF3,IL11,IL4,IL6,IRS2,JAK2,JUN,KDM6B,LIF,MAPK1,MMP3,NFKBIA,PARP1,PI3K (complex),PIK3R1,PPARG,REL,RELA,SFPQ,SMAD3,SP1,STAT4,SYK,TLR2,TLR9,TP53	ACTB,AHCY,ALDOC,APRT,ATP1A1,ATP5F1C,ATP5PO,B2M,CCT5,CD55,CNN3,CTSZ,DBI,DNM3,ERP29,ERP44,FABP3,FCER1G,FUBP1,GLRX,GLRX3,GSK3A,HINT1,HNRNPA2B1,HNRNPD,HNRNPH1,HNRNPH3,HNRNPM,HSP90B1,HSPE1,ILK,LASP1,LTB4R,MAPRE2,MINPP1,MPDU1,MPPE1,NAP1L4,NAPA,NUDC,NUDT21,P4HB,PABPC1,PDIA6,PGP,PLIN3,PPIA,PRKAR2B,PSMA2,PSMD2,RAB8A,RBM3,RCSD1,RELA,S100A9,SAMD9,SET,SF1,SH3KBP1,SLC16A3,STK4,SYNCRIP,SYTL1,TAGLN2,TES,TMOD3,T…	73 (38)	37	5-azacytidine,BCL6,PRKCA	capsaicin,geldanamycin,Immunoglobulin,rosiglitazone,simvastatin,YY1		IgG	FN1,IL13
HIPK1	kinase		3			-1.287	6.75e-14	0.0046	BHLHE40,BIRC5,CCND1,CDKN1A,CEBPA,CTNNB1,E2F1,EIF2AK3,ERBB2,GLI1,HIF1A,HIPK1,HNF4A,IGF1R,IL6,MTOR,NANOG,NFKB1,NQO1,PARP1,PDK1,PPARG,RB1,RELA,SP1,STAT3,tanespimycin,TP53,TP73,TSC2	ACOT1,AHCY,ALDOC,APOE,ATP1A1,ATP5F1C,AVIL,CD9,CDC42,CNN3,COX6B1,DBI,DNAJB1,DPP7,EIF3I,FABP3,FABP5,FKBP4,FUBP1,GSK3A,GSTO1,HINT1,HNRNPC,HNRNPH1,HSPA5,HSPD1,HSPE1,ILK,ITGA2B,KHSRP,LASP1,LTB4R,MAPRE2,MMRN1,MT-CO2,NAP1L4,NAPA,NUCKS1,NUDC,P4HB,PDIA6,PGP,PLEK,PLIN3,PPIA,PPIB,PSMA2,PSMD2,RAB8A,RAB8B,RBM3,RBMX,RELA,RNASEL,RPL7,SET,SH3KBP1,SLC44A2,SRI,STK4,SYNE2,SYTL1,TAGLN2,TES,THBS1,TMOD3,TUBB1,UBE2I,UQ…	73 (30)	28		FN1		NQO1,TP53
ZEB1	transcription regulator		3			-0.788	7.25e-14	0.0012	Akt,BAX,BBC3,BHLHE40,CCND1,CDKN1A,CEBPA,CHEK1,CREB1,CXCL12,E2F1,EGFR,ERBB2,ERN1,HIF1A,HNF4A,IGF1R,IL6,KAT5,LAMC2,MMP14,MTOR,MYC,NANOG,NFKB1,Notch,NRF1,Pka,PTEN,ROCK2,SERPINE1,SP1,TGFB1,TP53,UHRF1,USP7,WT1,XBP1,YAP1,ZEB1	ACOT1,ACTB,AHCY,ALDOC,APOE,APRT,ATP1A1,ATP5F1C,AVIL,CBFB,CCT3,CCT5,CDC42,CNN3,COX6B1,CYCS,DSC1,EIF3I,EIF4H,ERP44,FKBP2,FKBP4,FUBP1,GLRX5,GSK3A,GSTO1,HINT1,HNRNPA2B1,HNRNPC,HNRNPD,HNRNPH1,HSPA5,HSPD1,HSPE1,ILK,ITGA2B,KHSRP,LASP1,MAPRE2,MIF,MMP25,MMRN1,MPPE1,MT-CO2,MYL12A,NAP1L4,NUDT21,OLR1,P4HB,PABPC1,PCYT1A,PDE4D,PDIA6,PGP,PLEK,PPIA,PSMA2,PSMC6,PSMD2,PSMD6,RAB43,RAB8A,RBM3,RBMX,RELA,SEPTIN7,SET,S…	79 (40)	32	CUL7,ECM1,EGFR,ERG,levodopa,LGR4,NRF1,SKP2,SUMO-Ubc9 E2,TGM2,TRIM29	3,3'-diindolylmethane,FAT1,mir-515,NDRG1,silibinin,SRI		CCN2,CHEK1,EDN1,FN1,HK2,miR-199a-3p (and other miRNAs w/seed CAGUAGU),PKM,TF	CGA,KRT19,LPCAT1
HIF1A-AS1	other		3			-1.083	7.34e-14	0.0021	Akt,AKT1,BAX,CASP3,CDK2,DICER1,EIF4E,ESR1,HIF1A,HIF1A-AS1,HSF1,IL18,IRS2,JAK2,MTOR,MYC,NFkB (complex),NFKB1,PARP1,PRKCA,PTEN,RICTOR,SIRT1,STAT3,STAT5a/b,TP53,YBX1	ACTB,ALDOC,ATP1A1,ATP5PO,ATP6AP1,AVIL,CCT5,CD55,CD9,CDC42,CNN3,CTSZ,CYCS,DBI,DNAJB1,DSC1,FABP5,GLRX5,GNB1,GSK3A,HNRNPD,HNRNPH1,HNRNPM,HSP90B1,HSPE1,HUWE1,ILK,KHSRP,LTB4R,MAPRE2,MIF,MPPE1,NAP1L4,NUCKS1,NUDT21,OLR1,P4HB,PCYT1A,PDIA6,PGLS,PGP,PPIA,PPIB,PRKAR2B,PSMA2,PSMC6,PSMD2,PSMD6,PXN,RAB43,RAB5B,RAB8A,RBM3,RELA,SAMD9,SEC23A,SET,SLC16A3,SLC44A2,SYNCRIP,SYTL1,TES,TMOD3,TUBB1,UBE2I,UQCRC1,USO1,VWF,…	69 (27)	24				HIF1A,MTOR
IRGM	enzyme		3			0.855	7.69e-14	0.0025	AKT1,EIF4E,ESR1,HIF1A,HSF1,IRGM,IRS2,JAK2,MTOR,MYC,NFkB (complex),NFKB1,NR3C1,PRKCA,RICTOR,SIRT1,STAT3,STAT5a/b,TP53	ACTB,ALDOC,ATP1A1,ATP5PO,ATP6AP1,AVIL,B2M,CCT5,CD55,CD9,CDC42,CNN3,CTSZ,CYCS,DBI,DNAJB1,DSC1,FABP5,FUBP1,GLRX5,GNB1,GSK3A,HNRNPD,HNRNPH1,HNRNPM,HSP90B1,HSPE1,HUWE1,ILK,KHSRP,LTB4R,MAPRE2,MIF,NAP1L4,NUCKS1,NUDT21,OLR1,P4HB,PDIA6,PGLS,PGP,PPIA,PPIB,PRKAR2B,PSMA2,PSMC6,PSMD2,PSMD6,PXN,RAB5B,RAB8A,RBM3,RELA,S100A9,SAMD9,SET,SLC16A3,SLC44A2,SYTL1,TES,TMOD3,TUBB1,UBE2I,UQCRC1,USO1,VWF,WIPF1	67 (19)	19	APP	methylprednisolone			GBP1,IFI16,MTOR,PLCG1,reactive oxygen species,ZBP1
glutathione peroxidase	group		3	Activated		3.939	8.04e-14	0.0029	AKT1,ALOX5,ARG1,EIF2AK3,glutathione peroxidase,GPX1,GPX4,GPX5,GPX7,GSTA1,GSTK1,GSTM1,GSTP1,GSTZ1,HBEGF,HSPA5,INSR,IRF3,JUN,MAPK1,MAPK8,MMP2,MYC,NFE2L2,NFkB (complex),NFKBIA,P38 MAPK,PLAU,PPARG,PTGES,RELA,STAT5a/b,Tgf beta,TGFB1,TP53	ACTB,ATP1A1,ATP5F1C,ATP5PO,CBFB,CCT3,CCT5,CD55,CNN3,CORO1C,COX6B1,CTSZ,CYCS,DBI,EIF4H,ERP44,FABP3,FABP5,FKBP2,FKBP4,FUBP1,GLRX,GLRX5,GSK3A,GSTO1,HINT1,HNRNPC,HNRNPD,HNRNPH1,HNRNPM,HSPE1,LASP1,LTB4R,MAPRE2,MIF,MPDU1,MYL12A,NAP1L4,NAPA,NUDT21,P4HB,PDE4D,PDIA6,PLIN3,PPIA,PPIB,PSMD2,PXN,RAB8A,RBM3,RELA,RNASEL,RPL7,S100A9,SEC23A,SH3KBP1,SLC16A3,SRI,STK4,SYTL1,TES,TMOD3,TUBB1,UBE2I,VWF,ZYX	66 (35)	25	1,2-dithiol-3-thione,5-hydroxytryptamine,andrographolide,APOA1,APP,curcumin,dimethyl sulfoxide,epicatechin gallate,ESR1,L-carnitine,N-acetyl-L-cysteine,PRNP,rosiglitazone,simvastatin,TP53,Z-LLL-CHO	bisphenol A,cadmium,capsaicin,D-glucose,PARK7			ALOX5
acalabrutinib	chemical drug		3			0.391	8.12e-14	0.0006	acalabrutinib,Akt,Ap1,BTK,IKBKB,IKBKG,IKZF1,IRF3,JAK2,JUN,MAPK1,MAPK8,MAPK9,MARCKS,MTOR,NFkB (complex),NFKB1,NFKB2,NFKBIA,P38 MAPK,PLCG1,PLCG2,PRKCA,PRKCB,STAT5a/b,STAT5B,SYK,TLR3,TP53	ACOT1,AHCY,ALDOC,ATP1A1,ATP5F1C,AVIL,CD9,CNN3,CTSZ,CYCS,DBI,DNM3,ERP29,FABP5,FCER1G,FKBP4,FUBP1,GLRX3,GSK3A,HNRNPA2B1,HSP90B1,HSPD1,ILK,KHSRP,LASP1,LTB4R,MAPRE2,MIF,MMRN1,MPDU1,MPPE1,MT-CO2,NAP1L4,OLR1,P4HB,PDIA6,PGP,PPIB,PRKAR2B,PSMD2,PXN,RAB8A,RBM3,RCSD1,RELA,RPL7,S100A9,SET,SLC16A3,STK4,SYTL1,TAGLN2,TUBB1,UBE2I,UQCRC1,USO1,VWF,WIPF1,ZYX	59 (29)	27					BTK
BTK	kinase	-1.059	2			-0.397	9.02e-14	0.0011	BTK,ERK1/2,IKBKB,IKBKG,IKZF1,JAK2,JUN,MAPK1,MAPK8,MAPK9,MTOR,NFkB (complex),NFKB1,NFKB2,NFKBIA,P38 MAPK,PLCG1,PRKCA,PRKCB,STAT5a/b,STAT5B,SYK,TLR3,TP53	ACOT1,AHCY,ALDOC,ATP1A1,ATP5F1C,AVIL,B2M,CNN3,CTSZ,CYCS,DBI,DNM3,ERP29,FABP5,FCER1G,FKBP4,FUBP1,GLRX3,GSK3A,HNRNPA2B1,HSP90B1,HSPD1,ILK,KHSRP,LASP1,LTB4R,MAPRE2,MIF,MMRN1,MPDU1,MT-CO2,NAP1L4,OLR1,P4HB,PDIA6,PGP,PPIB,PRKAR2B,PSMD2,PXN,RAB8A,RBM3,RCSD1,RELA,RPL7,S100A9,SET,SLC16A3,SYTL1,TAGLN2,TUBB1,UBE2I,UQCRC1,USO1,VWF,WIPF1,ZYX	57 (24)	24	BCR-ABL1,CBL,DNMT3A,F2,FYN,IL5,WT1	acalabrutinib,CG-806,dasatinib,methylprednisolone		CXCR4,IL13,JUN,MPO,MTOR,NFKB1,PLCG1,PRKCA,SELP	PTPN11
ALOX5	enzyme	1.16	2	Inhibited		-3.255	9.32e-14	0.002	ALOX5,ARG1,EIF2AK3,ERK,MYC,P38 MAPK,PPARG,TGFB1,TP53	ACTB,ATP1A1,ATP5F1C,ATP5PO,CBFB,CCT3,CCT5,CD55,CD9,CNN3,CORO1C,COX6B1,CYCS,DBI,EIF4H,FABP3,FABP5,FCER1G,FKBP2,FKBP4,FUBP1,GLRX5,GSK3A,HINT1,HNRNPA2B1,HNRNPC,HNRNPD,HNRNPH1,HSPE1,LASP1,LTB4R,MAPRE2,MIF,MT-CO2,MYL12A,NAP1L4,NAPA,NUDT21,OLR1,P4HB,PDE4D,PDIA6,PLIN3,PPIA,PSMD2,PXN,RAB8A,RBM3,RNASEL,RPL7,SLC16A3,SRI,TES,THBS1,TMOD3,UBE2I,UQCRC1,USO1,ZYX	59 (9)	8	AHR,BHLHE40,celecoxib,IL5,rosiglitazone,RUNX1-RUNX1T1	caffeic acid,curcumin,CYM50358,ESR1,glutathione peroxidase,IL4,KRP-203		APP,ITGAV,mir-34	EIF2A,EIF2AK3,miR-30a-3p (and other miRNAs w/seed UUUCAGU),miR-30c-5p (and other miRNAs w/seed GUAAACA),miR-378a-3p (and other miRNAs w/seed CUGGACU),miR-9-5p (and other miRNAs w/seed CUUUGGU)
cholesterol	chemical - endogenous mammalian		2			-0.267	9.75e-14	0.0013	AKT1,CCR5,CD3,cholesterol,CXCR4,EGFR,EIF2AK3,ERBB2,ERBB3,ERK,ERN1,LRP1,MAPK1,MAPK8,Mek,MTOR,NFE2L2,NFkB (complex),NOTCH1,P38 MAPK,PI3K (complex),Pka,RELA,SRC (family),SREBF2,SYK,TLR4	ACTB,ALDOC,ATP1A1,ATP5F1C,AVIL,B2M,CCT3,CCT5,CD55,CD9,CDC42,DBI,FABP5,FCER1G,FKBP2,GSTO1,HINT1,HNRNPA2B1,HNRNPD,HNRNPH1,HNRNPM,HSP90B1,HSPA5,HSPE1,HUWE1,ITGA2B,LASP1,MIF,MMRN1,NAPA,NUDC,P4HB,PABPC1,PCYT1A,PDE4D,PDIA6,PGP,PLEK,PPIA,PRKAR2B,PXN,RBM3,RCSD1,RNASEL,SEC23A,SH3KBP1,SLC16A3,STK4,SYTL1,TBCB,THBS1,TUBB1,UBE2I,USO1,VPS4B,WIPF1	56 (27)	27	AHR,APOA1,APOC3,CXCL14,cyclosporin A,D-glucose,F2,HSF1,Immunoglobulin,Insulin,KISS1R,LCAT,metribolone,mir-122,Mir122a,b,MLXIPL,MPO,NDRG1,NFIL3,PEMT,PKM,PRL,PRNP,RAB2A,rosiglitazone,TGM2,thapsigargin	ADCYAP1,APOA5,ascorbic acid,caffeic acid,curcumin,epicatechin gallate,ESR1,heparin,hydroxypropyl-beta-cyclodextrin,JUN,L-carnitine,lapaquistat,LCN2,LGR4,manganese chloride,miR-122-5p (miRNAs w/seed GGAGUGU),miR-30c-5p (and other miRNAs w/seed GUAAACA),naringenin,NCEH1,plicamycin,pravastatin,PSEN1,PSEN2,RSPO3,SGPL1,silibinin,simvastatin,tanespimycin,taurodeoxycholic acid,TXNIP,UHMK1,vorinostat,WRN		acyl-coenzyme A,EIF2AK3,ERN1,FLT1,FN1,HSP90B1,MTOR,reactive oxygen species,SLC7A5,XBP1	CD3,CXCR4,EGFR,ERBB4,MAP2,UXT
mir-190	microRNA		3			-0.855	1.06e-13	0.0028	Akt,AKT1,EIF4E,EIF4EBP,ESR1,HIF1A,HSF1,IRS2,JAK2,mir-190,MTOR,MYC,NFkB (complex),NFKB1,NR3C1,PRKCA,RICTOR,RPS6,SIRT1,STAT3,STAT5a/b,TP53	ACTB,ALDOC,ATP1A1,ATP5PO,ATP6AP1,AVIL,CCT5,CD55,CD9,CDC42,CNN3,CTSZ,CYCS,DBI,DNAJB1,DSC1,FABP5,FUBP1,GLRX5,GNB1,GSK3A,HNRNPD,HNRNPH1,HNRNPM,HSP90B1,HSPE1,HUWE1,ILK,KHSRP,LTB4R,MAPRE2,MIF,MPPE1,NAP1L4,NUCKS1,NUDT21,OLR1,P4HB,PDIA6,PGLS,PGP,PPIA,PPIB,PRKAR2B,PSMA2,PSMC6,PSMD2,PSMD6,PXN,RAB5B,RAB8A,RBM3,RELA,S100A9,SAMD9,SET,SLC16A3,SLC44A2,SYTL1,TES,TMOD3,TUBB1,UBE2I,UQCRC1,USO1,VWF,WIPF1	67 (22)	19	TP53			MTOR	NLRC3
arsenic	chemical toxicant		2			-1.54	1.06e-13	0.0002	arsenic,EGFR,ERK,ERK1/2,HIF1A,MTOR,NFE2L2,SP1,TP53	ACTB,AHCY,ALDOC,APOE,ATP5F1C,ATP5PO,AVIL,B2M,CCT3,CCT5,CD55,CNN3,CYCS,DBI,ERP29,FABP5,FKBP4,FUBP1,GSK3A,GSTO1,HINT1,HNRNPA2B1,HNRNPD,HNRNPH1,HSP90B1,HSPD1,HSPE1,HUWE1,ILK,ITGA2B,LASP1,MAPRE2,MIF,NAP1L4,NUCKS1,NUDC,P4HB,PABPC1,PCYT1A,PGP,PPIA,PPIB,PRKAR2B,PSMD2,RAB8A,RBM3,RPL7,SEC23A,TAGLN2,USO1,ZYX	51 (9)	8				EGFR,ESR1,HIF1A,NQO1,reactive oxygen species,SPINK1	IL13,MTOR,TP53
OXSR1	kinase	-1.015	3	Inhibited		-2.138	1.13e-13	0.0025	AR,BHLHE40,BIRC5,BRCA1,CCN2,CCND1,CDKN1A,CEBPA,CTNNB1,E2F1,EGFR,EIF2AK3,ERBB2,ERN1,ESR1,GLI1,HIF1A,IL6,NANOG,NFKB1,NFKBIA,OXSR1,PKN1,PPARG,PPARGC1A,RELA,SMAD2,SMAD3,TGFB1,TGM2,TP53,TP73,TSC2	AHCY,ALDOC,APOE,ATP1A1,ATP1B3,ATP5F1C,ATP6AP1,CBFB,CCT3,CCT5,CNN3,CORO1C,DBI,DPP7,DSC1,EIF3I,EIF4H,FABP3,FABP5,FKBP2,FKBP4,FUBP1,GNB1,GSK3A,GSTO1,HNRNPC,HNRNPD,HNRNPH1,HSP90B1,HSPD1,HSPE1,ILK,ITGA2B,KHSRP,LASP1,LTB4R,MAPRE2,MMRN1,MPDU1,MT-CO2,MYL12A,NAP1L4,NAPA,NUCKS1,NUDC,P4HB,PABPC1,PDE4D,PDIA6,PGLS,PLEK,PLIN3,PSMA2,PSMD2,RAB5B,RAB8A,RAB8B,RBM3,RELA,RNASEL,RPL7,SAMD9,SET,SH3KBP1,SLC44A2,SRI,STK…	79 (33)	31	MTOR,MTORC2			TP53
SNX27	other	1.966	3			-1	1.14e-13	0.0012	AKT1,EIF4EBP1,ESR1,HIF1A,HMGA1,HSF1,IRS2,JAK2,MTOR,MYC,NFkB (complex),NFKB1,NR3C1,p70 S6k,PDX1,PRKCA,RICTOR,SNX27,STAT5a/b,TP53	ALDOC,ATP1A1,ATP5PO,ATP6AP1,AVIL,CCT5,CD55,CDC42,CNN3,CYCS,DBI,DNAJB1,DSC1,FABP5,FUBP1,GLRX5,GNB1,GSK3A,HNRNPD,HNRNPH1,HNRNPM,HSP90B1,HSPD1,HSPE1,HUWE1,ILK,KHSRP,LTB4R,MAPRE2,MIF,NAP1L4,NUCKS1,NUDT21,OLR1,P4HB,PDIA6,PGLS,PGP,PPIA,PPIB,PRKAR2B,PSMA2,PSMC6,PSMD2,PSMD6,PXN,RAB5B,RAB8A,RBM3,RELA,S100A9,SAMD9,SEPTIN2,SET,SLC16A3,SLC44A2,SYTL1,TES,TMOD3,TUBB1,UBE2I,UQCRC1,USO1,VWF	64 (20)	18	VPS26A			MTOR	APP
PSEN1	peptidase		2			0	1.19e-13	0.0005	Akt,AKT1,Creb,EGFR,MAPK8,NOTCH1,PSEN1,RELA,TP53	ACTB,AHCY,APOE,ATP1A1,ATP5F1C,CCT5,CD9,CNN3,CTSZ,DBI,DHRS7,FABP5,FCER1G,FKBP4,FUBP1,GNB1,GSK3A,HNRNPA2B1,HNRNPD,HNRNPH1,HNRNPM,HSPD1,HSPE1,ILK,ITGA2B,LASP1,LTB4R,MAPRE2,MIF,MPPE1,NAP1L4,NUDC,OLR1,P4HB,PABPC1,PDIA6,PLIN3,PPIA,PSMD2,PXN,RAB8A,RBM3,RPL7,SH3KBP1,STK4,SYTL1,TAGLN2,UQCRC1,USO1,ZYX	50 (9)	9	APH1A,CSNK1G2,elastase,lactacystin,linoleic acid,pifithrin alpha,proteasome inhibitor PSI,UBQLN1	cyanocobalamin,GABA,Insulin,KLF3,miR-30c-5p (and other miRNAs w/seed GUAAACA),PSEN2		F2R,HTRA2	ATP1A2,cholesterol,GPX5,Immunoglobulin
CBLB	enzyme		2	Activated		4.258	1.29e-13	0.0009	Akt,AKT1,CBLB,CD247,Cdc42,EGFR,EIF2AK3,ERK1/2,FOXO3,Jnk,MAPK1,NFKB2,PI3K (complex),PIK3R1,PLCG1,PTEN,RELA,SYK,TGFB1	ACTB,ALDOC,APOE,ATP1A1,CBFB,CCT5,CD55,CD9,CNN3,CORO1C,CTSZ,EIF4H,ERP29,FABP5,FKBP2,FUBP1,HINT1,HNRNPA2B1,HNRNPC,HNRNPD,HNRNPH1,HNRNPM,HSP90B1,HSPA5,HSPE1,ILK,LASP1,MPPE1,MT-CO2,MYL12A,NAPA,NUDC,OLR1,PABPC1,PDE4D,PPIA,PRKAR2B,PXN,RAB43,RBM3,RCSD1,RNASEL,SEC23A,SH3KBP1,SRI,STK4,SYNCRIP,SYTL1,TMOD3,UBE2I,VPS4B,WIPF1,ZYX	53 (19)	18	methylprednisolone	CD28,CD3,FYN,Insulin			CD247,EIF2AK3,GZMB,IL4,PLCG1
TRIM29	transcription regulator		3			1.627	1.29e-13	0.0056	Akt,AKT1,BHLHE40,BIRC5,BRCA1,CCND1,CDKN1A,CEBPA,CTNNB1,E2F1,EIF2AK3,EIF4E,EP300,ERBB2,ERK1/2,GLI1,H2AX,HIF1A,HNF4A,IGF1R,IL6,KAT2B,MAP3K7,MAPK1,MTOR,NANOG,NFKB1,NFKBIA,PARP1,PPARG,RB1,RELA,SP1,STAT3,TAB2,TP53,TP53BP1,TP73,TRIM29,TSC2	ACOT1,AHCY,ALDOC,APOE,ATP1A1,ATP5F1C,AVIL,B2M,CD9,CDC42,CNN3,COX6B1,DBI,DPP7,EIF3I,ERP29,FABP3,FABP5,FKBP4,FUBP1,GSK3A,GSTO1,HINT1,HNRNPD,HNRNPH1,HNRNPM,HSPA5,HSPD1,HSPE1,ILK,ITGA2B,KHSRP,LASP1,LTB4R,MAPRE2,MMRN1,MPDU1,MPPE1,MT-CO2,NAP1L4,NAPA,NUCKS1,NUDC,P4HB,PDIA6,PGP,PLEK,PLIN3,PPIA,PPIB,PSMA2,PSMD2,RAB8A,RAB8B,RBM3,RELA,RNASEL,RPL7,SET,SH3KBP1,SRI,STK4,SYNE2,SYTL1,TAGLN2,TES,THBS1,TMOD3,TUBB1…	74 (40)	36	methylprednisolone	IgG		CXCR4,ZEB1	TP53
RPL11	other	-2.131	3			0.113	1.32e-13	0.0049	Akt,AKT1,AR,BHLHE40,BIRC5,CCND1,CDK4/6,CEBPA,CREB1,E2F1,ERBB2,F2,HIPK2,HNF4A,IL6,KAT5,MDM2,MTOR,MYC,MYCN,NANOG,NFKB1,Pka,PPARG,PTEN,RARA,RELA,RPL11,SMAD4,SP1,STAT3,TP53,TP63,TSC2	ACOT1,ACTB,AHCY,APOE,ATP1A1,ATP5F1C,ATP6AP1,AVIL,CBFB,CCT3,CD9,CNN3,CORO1C,COX6B1,CYCS,DPP7,EIF3I,ERP29,FABP3,FKBP4,FUBP1,GLRX5,GSK3A,HINT1,HNRNPA2B1,HNRNPD,HNRNPH1,HNRNPM,HSPA5,HSPD1,HSPE1,ILK,ITGA2B,KHSRP,LASP1,LTB4R,MAPRE2,MIF,MMRN1,MPPE1,MT-CO2,MYL12A,NAP1L4,NUDC,NUDT21,OLR1,P4HB,PDE4D,PDIA6,PGLS,PGP,PLEK,PPIA,PPIB,PSMA2,PSMD2,PSMD6,RAB43,RAB8A,RBM3,RBMX,SAMD9,SEC23A,SET,SH3KBP1,SLC16A3,SRI,S…	79 (34)	32	MLXIPL	5-fluorouracil,CD 437,RICTOR		TP53
1-palmitoyl-2-oleoylphosphatidic acid	chemical - endogenous mammalian		3			-0.739	1.35e-13	0.0027	1-palmitoyl-2-oleoylphosphatidic acid,Akt,ESR1,HIF1A,HSF1,INSR,IRS2,JAK2,MTOR,MYC,NFkB (complex),NFKB1,NR3C1,PRKCA,RICTOR,RPTOR,SIRT1,SREBF1,SREBF2,STAT3,STAT5a/b,TP53	ACTB,ALDOC,ATP5PO,ATP6AP1,AVIL,CCT5,CD55,CD9,CDC42,CNN3,CYCS,DBI,DNAJB1,DSC1,FABP3,FABP5,FUBP1,GLRX5,GNB1,GSK3A,HNRNPD,HNRNPH1,HSP90B1,HSPE1,HUWE1,ILK,KHSRP,LTB4R,MAPRE2,MIF,MPPE1,NAP1L4,NUCKS1,NUDT21,OLR1,P4HB,PCYT1A,PDIA6,PGLS,PGP,PPIA,PPIB,PRKAR2B,PSMA2,PSMC6,PSMD2,PSMD6,PXN,RAB5B,RAB8A,RBM3,RELA,S100A9,SAMD9,SET,SLC16A3,SLC44A2,SYTL1,TES,TMOD3,TUBB1,UBE2I,UQCRC1,USO1,VWF,WIPF1	66 (22)	20				MTOR
ZMIZ1	transcription regulator		3			-1.889	1.4e-13	0.0066	Akt,AKT1,AR,ATF4,BAK1,BAX,CCN2,CCND1,CDK4/6,Creb,CREB1,CTNNB1,EGFR,ERBB2,ESR1,F2,GCK,GLI1,HIF1A,MAPK7,MTOR,MYC,NFKBIA,NR4A1,Pka,PPARGC1A,PTEN,RB1,SMAD3,SP1,SREBF2,STK11,STUB1,TGFB1,TGM2,TP73,ZMIZ1	ACTB,AHCY,ALDOC,ATP1B3,ATP5F1C,ATP5PO,ATP6AP1,AVIL,CBFB,CCT3,CCT5,CNN3,CORO1C,CYCS,DBI,DNM3,DSC1,EIF4H,FABP3,FABP5,FKBP2,FKBP4,FUBP1,GLRX5,GNB1,GSK3A,HINT1,HNRNPA2B1,HNRNPC,HNRNPD,HNRNPH1,HNRNPM,HSP90B1,HSPA5,HSPD1,HSPE1,HUWE1,ILK,MAPRE2,MIF,MPDU1,MPPE1,MT-CO2,MYL12A,NAPA,NUCKS1,NUDC,NUDT21,OLR1,PABPC1,PDE4D,PDIA6,PGLS,PGP,PLIN3,PPIA,PPIB,RAB43,RAB5B,RAB8B,RBM3,RBMX,RNASEL,RPL7,SAMD9,SEC23A,SLC16…	81 (37)	36
Immunoglobulin	complex		2			0.882	1.41e-13	0.0027	Akt,CD247,EGFR,GPX1,IGF1R,IL4,Immunoglobulin,MAP3K7,MAPK1,MAPK8,MTOR,NFKB1,NFKBIA,Nos,PI3K (family),PLCG1,RB1,Smad2/3,STAT3,STAT5a/b,SYK,TGFB1,ZAP70	ACTB,ALDOC,APOE,APRT,ATP1A1,ATP5PO,AVIL,B2M,CBFB,CD55,CD9,CDC42,CNN3,CORO1C,COX6B1,CTSZ,EIF4H,ERP29,FCER1G,FKBP2,FUBP1,GLRX,HINT1,HNRNPA2B1,HNRNPC,HNRNPD,HNRNPH3,HSPE1,ILK,KHSRP,LTB4R,MIF,MPDU1,MPPE1,MYL12A,NUDC,OLR1,PABPC1,PDE4D,PDIA6,PGP,PLEK,PPIA,PPIB,PSMA2,PXN,RBM3,RCSD1,RELA,RNASEL,S100A9,SRI,STK4,SYTL1,TES,TMOD3,TUBB1,UBE2I,UQCRC1,USO1,VPS4B,VWF,WIPF1	63 (23)	23	dichloroacetic acid,PTTG1,XRCC6	PSEN1,PSEN2,TNFSF10		ATR,BATF,BIRC5,C5AR1,CBL,CCN2,CD247,CHEK2,cholesterol,CUL4B,CXCR4,GZMB,HEY1,HTRA2,IFI16,IL12R,IL5,MTOR,MTORC1,PI3K (family),PLCG1,reactive oxygen species,SELP,TRAF4,TXNIP	ANGPT2,ANPEP,BCL6,CEBPD,CIITA,CMA1,D-glucose,DDIT4,DPYSL2,EGFR,EIF2A,EIF2AK3,FN1,LGALS1,MPO,MTORC2,MUC5AC,NFIL3,NT5E,PDIA6,PRDX5,PTPN11,RGS2,SPINK1,TXN,TXNRD1
ERVW-1	other		3	Inhibited		-2.165	1.43e-13	0.007	Akt,AR,BHLHE40,BIRC5,CCND1,CDKN1A,CEBPB,CTNNB1,E2F1,EIF2AK3,EIF4E,EP300,ERBB2,ERK1/2,ERVW-1,GLI1,HIF1A,HNF4A,IGF1R,IL6,KAT2B,MTOR,NANOG,NFKB1,NFKBIA,PPARG,PTEN,RB1,RELA,SP1,STAT3,TP53,TP73,TSC2	ACOT1,ACTB,AHCY,ALDOC,APOE,ATP1A1,ATP5F1C,ATP6AP1,AVIL,B2M,CCT3,CD9,CDC42,CNN3,COX6B1,DBI,DPP7,EIF3I,FABP3,FABP5,FKBP4,FUBP1,GSK3A,GSTO1,HINT1,HNRNPD,HNRNPH1,HSPA5,HSPD1,HSPE1,ILK,ITGA2B,KHSRP,LASP1,LTB4R,MAPRE2,MPDU1,MPPE1,MT-CO2,NAP1L4,NAPA,NUCKS1,NUDC,NUDT21,OLR1,P4HB,PDIA6,PGP,PLEK,PLIN3,PPIA,PPIB,PSMA2,PSMD2,RAB43,RAB8A,RAB8B,RBM3,RELA,RNASEL,RPL7,SEC23A,SET,SH3KBP1,SRI,STK4,SYNCRIP,SYNE2,SY…	77 (34)	34		7-ketocholesterol		CREB3L1,LATS2,TP53,XBP1
thapsigargin	chemical toxicant		2			-1.921	1.47e-13	0.0014	AKT1,ATF1,ATF4,BAX,CASP8,Creb,CREB1,EGFR,EIF2AK3,ERN1,IRF3,LIPE,MAPK1,MTOR,NFkB (complex),P38 MAPK,Pka,RELA,STIM1,TGM2,thapsigargin,TP53	ACTB,AHCY,ATP1A1,ATP1B3,ATP5F1C,CCT5,CD55,CD9,CNN3,CYCS,DBI,ERP29,FABP5,FCER1G,FKBP4,FUBP1,GSK3A,GSTO1,HNRNPA2B1,HNRNPD,HNRNPH1,HNRNPM,HSP90B1,HSPA5,HSPD1,HSPE1,ILK,LASP1,LTB4R,MAPRE2,NAP1L4,NAPA,NUDC,OLR1,P4HB,PABPC1,PDE4D,PDIA6,PGP,PLIN3,PPIA,PPIB,PRKAR2B,PSMD2,PXN,RAB8A,RBMX,RNASEL,RPL7,S100A9,SLC16A3,SRI,STK4,SYTL1,TAGLN2,TBCB,THBS1,UBE2I,UQCRC1,WIPF1,ZYX	61 (22)	22				aldosterone,ATF1,BCL6,C5AR1,CDA,cholesterol,CREB3L1,CREB3L2,DDIT4,EDEM1,EGFR,EIF2A,EIF2AK3,ERN1,HSP90B1,IL5,JUN,LONP1,MTOR,NFIL3,PARP16,PRNP,reactive oxygen species,SREBF1,SRI,SYVN1,TGM2,TNFSF10,TP53,XBP1	CA9,ESR1,FN1,HIF1A,Insulin,LGR5,Manf,MTORC1,OXT
SLC7A5	transporter		3			-0.367	1.5e-13	0.0021	Akt,AKT1,CDKN1B,Creb,EIF2AK4,EIF4E,ESR1,HIF1A,HSF1,IRS2,JAK2,MTOR,MTORC1,MYC,NFKB1,NR3C1,PRKCA,RELA,RICTOR,SIRT1,SLC7A5,SREBF1,SREBF2,STAT3,STAT5a/b,TP53	ACTB,ALDOC,ATP1A1,ATP5PO,ATP6AP1,AVIL,CCT5,CD55,CD9,CDC42,CNN3,CTSZ,CYCS,DBI,DNAJB1,DSC1,FABP3,FABP5,FUBP1,GLRX5,GNB1,GSK3A,HNRNPD,HNRNPH1,HNRNPM,HSP90B1,HSPE1,HUWE1,ILK,KHSRP,LTB4R,MAPRE2,MIF,MPPE1,NAP1L4,NUCKS1,NUDT21,P4HB,PDIA6,PGLS,PGP,PLIN3,PPIA,PPIB,PRKAR2B,PSMA2,PSMC6,PSMD2,PSMD6,RAB5B,RAB8A,RBM3,RELA,S100A9,SAMD9,SET,SH3KBP1,SLC16A3,SLC44A2,SYTL1,TES,TMOD3,UBE2I,UQCRC1,USO1,VWF,WIPF1	67 (26)	23	5-azacytidine,CD28,cholesterol,ESR1,IL5,SYVN1,WNT5B	COPS5,PAX3-FOXO1,RORC		MTOR,MTORC1
calpain inhibitor 2	chemical - protease inhibitor		3	Activated		2.25	1.52e-13	0.0003	26s Proteasome,AHR,calpain,calpain inhibitor 2,CASP3,CASP7,CDK2,COL18A1,CRYAB,EGFR,IGF1R,IL18,ITGAV,ITGB3,JUN,MAPK1,MAPK8,MTOR,NFkB (complex),P38 MAPK,PARP1,PI3K (complex),PLCG1,PPARGC1A,PTEN,RB1,REL,SMAD3,SOD2,STAT6,SYK,Tgf beta,TGFB1,TP53,ZAP70	AHCY,ALDOC,ATP1A1,ATP5F1C,AVIL,CBFB,CCT5,CDC42,CNN3,CORO1C,COX6B1,DBI,DNAJB1,EIF4H,ERP29,FABP3,FKBP2,FKBP4,GSK3A,HINT1,HNRNPA2B1,HNRNPC,HNRNPD,HNRNPH3,HSP90B1,HSPA5,HSPD1,HSPE1,ILK,LASP1,LTB4R,MAPRE2,MIF,MINPP1,MMP25,MYL12A,NAP1L4,NUDC,P4HB,PABPC1,PCYT1A,PDE4D,PGP,PPIA,PPIB,PSMD6,PXN,RAB43,RAB8A,RCSD1,RELA,RPL7,SEC23A,SET,SRI,SYNCRIP,TAGLN2,TES,TMOD3,UBE2I,USO1,VPS4B,VWF,ZYX	64 (35)	31				CRYAB,HSP90B1,TP53	ITGAV
APH1B	peptidase		3			1.835	1.67e-13	0.008	Akt,AKT1,APH1B,BHLHE40,BIRC5,CASP3,CCND1,CDKN1A,CEBPA,CTNNB1,DICER1,E2F1,EIF2AK3,EIF4E,EP300,ERBB2,ERK1/2,GLI1,HIF1A,HNF4A,IGF1R,IL6,JUN,KAT2B,MTOR,NANOG,NFKB1,NFKBIA,PARP,PARP1,PPARG,PTEN,RB1,RELA,SP1,STAT3,TP53,TP73,TSC2	ACOT1,AHCY,ALDOC,APOE,ATP1A1,ATP5F1C,AVIL,B2M,CD9,CDC42,CNN3,COX6B1,DBI,DPP7,EIF3I,FABP3,FABP5,FKBP4,FUBP1,GSK3A,GSTO1,HINT1,HNRNPA2B1,HNRNPH1,HNRNPM,HSPA5,HSPD1,HSPE1,ILK,ITGA2B,KHSRP,LASP1,LTB4R,MAPRE2,MMRN1,MPDU1,MPPE1,MT-CO2,NAP1L4,NAPA,NUCKS1,NUDC,P4HB,PDIA6,PGP,PLEK,PLIN3,PPIA,PPIB,PSMA2,PSMD2,RAB43,RAB8A,RAB8B,RBM3,RELA,RNASEL,RPL7,SEC23A,SH3KBP1,SRI,STK4,SYNCRIP,SYNE2,SYTL1,TAGLN2,TES,THB…	76 (39)	36	AHR,APP				TP53
APH1A	peptidase		3			1.835	1.72e-13	0.0064	Akt,APH1A,BHLHE40,BIRC5,CASP3,CCND1,CDKN1A,CEBPA,CTNNB1,DICER1,E2F1,EIF2AK3,EIF4E,EP300,ERBB2,ERK1/2,GLI1,HIF1A,HNF4A,IGF1R,IL6,JUN,KAT2B,MTOR,NANOG,NFKB1,NFKBIA,PARP,PARP1,PPARG,PSEN1,PSEN2,PTEN,RB1,RELA,Secretase gamma,SP1,STAT3,TP53,TP73,TREM2,TSC2	ACOT1,AHCY,ALDOC,APOE,ATP1A1,ATP5F1C,AVIL,B2M,CDC42,CNN3,COX6B1,DBI,DHRS7,DPP7,EIF3I,FABP3,FABP5,FKBP4,FUBP1,GNB1,GSK3A,GSTO1,HINT1,HNRNPA2B1,HNRNPH1,HSPA5,HSPD1,HSPE1,ILK,ITGA2B,KHSRP,LASP1,LTB4R,MAPRE2,MMRN1,MPDU1,MPPE1,MT-CO2,NAP1L4,NAPA,NUCKS1,NUDC,P4HB,PDIA6,PGP,PLEK,PLIN3,PPIA,PPIB,PSMA2,PSMD2,RAB43,RAB8A,RAB8B,RBM3,RELA,RNASEL,RPL7,SEC23A,SH3KBP1,SRI,STK4,SYNCRIP,SYNE2,SYTL1,TAGLN2,TES,THB…	76 (42)	38	IL4			PSEN1,PSEN2,PSENEN	EGFR,TP53
PSENEN	peptidase		3			1.835	1.74e-13	0.0067	Akt,BHLHE40,BIRC5,CASP3,CCND1,CDKN1A,CEBPA,CTNNB1,DICER1,E2F1,EIF2AK3,EIF4E,EP300,ERBB2,ERK1/2,GLI1,HIF1A,HNF4A,IGF1R,IL6,JUN,KAT2B,MTOR,NANOG,NFKB1,NFKBIA,PARP,PARP1,PPARG,PSEN1,PSEN2,PSENEN,PTEN,RB1,RELA,Secretase gamma,SP1,STAT3,TP53,TP73,TREM2,TSC2	ACOT1,AHCY,ALDOC,APOE,ATP1A1,ATP5F1C,AVIL,B2M,CDC42,CNN3,COX6B1,DBI,DHRS7,DPP7,EIF3I,FABP3,FABP5,FKBP4,FUBP1,GNB1,GSK3A,GSTO1,HINT1,HNRNPA2B1,HNRNPH1,HSPA5,HSPD1,HSPE1,ILK,ITGA2B,KHSRP,LASP1,LTB4R,MAPRE2,MMRN1,MPDU1,MPPE1,MT-CO2,NAP1L4,NAPA,NUCKS1,NUDC,P4HB,PDIA6,PGP,PLEK,PLIN3,PPIA,PPIB,PSMA2,PSMD2,RAB43,RAB8A,RAB8B,RBM3,RELA,RNASEL,RPL7,SEC23A,SH3KBP1,SRI,STK4,SYNCRIP,SYNE2,SYTL1,TAGLN2,TES,THB…	76 (42)	38	APH1A			APP	TP53
RGL2	other		3			1.89	1.79e-13	0.0018	26s Proteasome,AR,CDK2,CDKN1A,E2F1,FOS,FOXO4,GATA1,Hif1,HIF1A,JUN,P38 MAPK,Pkc(s),RB1,RGL2,SIRT1,SP1,SPI1,TCF3,TGFB1,TP53	AHCY,ALDOC,APOE,ATP1A1,ATP5F1C,ATP5PO,ATP6AP1,CCT3,CCT5,CD55,CD9,CORO1C,CYCS,DBI,EIF3I,EIF4H,FABP5,FCER1G,FKBP2,FUBP1,GSK3A,GSTO1,HINT1,HNRNPA2B1,HNRNPC,HNRNPH1,HSP90B1,HSPA5,HSPD1,HSPE1,HUWE1,LASP1,LTB4R,MAPRE2,MYL12A,NAP1L4,NUCKS1,NUDC,OLR1,PCYT1A,PDE4D,PDIA6,PLEK,PPIA,PRKAR2B,PSMA2,PSMD2,PSMD6,PXN,RAB8A,RBM3,RPL7,S100A9,SLC16A3,SRI,TAGLN2,THBS1,TMOD3,TUBB1,UBE2I,USO1,WIPF1,ZYX	63 (21)	20	curcumin			JUN
UTS2	other		3			-0.762	1.86e-13	0.0014	Akt,AKT1,Cdc42,CHUK,Creb,ECT2,HRAS,IKBKB,IRF4,MAP3K8,MAPK1,MAPK8,MRTFA,MYC,NFATC1,NFkB (complex),NFKB1,P38 MAPK,PI3K (complex),PLD2,PPARG,PRKCA,PRKCB,PTEN,RELA,RHOA,ROCK,ROCK2,SMAD3,SRF,STAT3,STAT5a/b,Tgf beta,TP53,UTS2,YAP1	AHCY,ATP1A1,ATP5F1C,ATP5PO,CCT3,CD9,CDC42,CNN3,COX6B1,CTSZ,CYCS,DSC1,ERP29,FABP3,FKBP4,FUBP1,GLRX5,GNB1,GSK3A,HNRNPD,HNRNPH1,HNRNPM,HSP90B1,HSPD1,HSPE1,KHSRP,LASP1,LTB4R,MAPRE2,MIF,MMP25,MPPE1,NAP1L4,NUDT21,P4HB,PCYT1A,PDIA6,PLIN3,PPIA,PPIB,PRKAR2B,PSMA2,PSMD2,RAB43,RAB8A,RBM3,RCSD1,SEC23A,SH3KBP1,SLC16A3,STK4,SYNCRIP,SYTL1,TAGLN2,TES,THBS1,TMOD3,TUBB1,UBE2I,UQCRC1,USO1,VWF	62 (36)	35				reactive oxygen species,RHOA
MTOR	kinase		2			-0.739	1.87e-13	0.0035	AKT1,EIF4E,ESR1,HIF1A,HSF1,IRS2,JAK2,MTOR,MYC,NFkB (complex),NFKB1,NR3C1,PRKCA,RICTOR,SIRT1,STAT3,STAT5a/b,TP53	ACTB,ALDOC,ATP1A1,ATP5PO,ATP6AP1,AVIL,CCT5,CD55,CD9,CDC42,CNN3,CTSZ,CYCS,DBI,DNAJB1,DSC1,FABP5,FUBP1,GLRX5,GNB1,GSK3A,HNRNPD,HNRNPH1,HNRNPM,HSP90B1,HSPE1,HUWE1,ILK,KHSRP,LTB4R,MAPRE2,MIF,NAP1L4,NUCKS1,NUDT21,OLR1,P4HB,PDIA6,PGLS,PGP,PPIA,PPIB,PRKAR2B,PSMA2,PSMC6,PSMD2,PSMD6,PXN,RAB5B,RAB8A,RBM3,RELA,S100A9,SAMD9,SET,SLC16A3,SLC44A2,SYTL1,TES,TMOD3,TUBB1,UBE2I,UQCRC1,USO1,VWF,WIPF1	66 (18)	18	1-palmitoyl-2-oleoylphosphatidic acid,2,4-dinitrophenol,5-hydroxytryptamine,ABL1,aldosterone,anisomycin,arsenite,ASPSCR1-TFE3,bisphenol A,BTK,CBL,CD28,CDK4/6,cholesterol,Congo Red,cyclosporin A,D-glucose,DCN,FN1,FSH,HIF1A-AS1,HRH3,Immunoglobulin,Insulin,L-threonine,LGALS1,manganese chloride,MDK,mir-190,pexidartinib,polyphosphate,pravastatin,SIRT7,SLC7A5,SNX27,TBK1,TCR,TGM2,thapsigargin,TNFSF10,TS…	8-chlorophenylthio-adenosine 3',5'-cyclic monophosphate,apitolisib,APP,arsenic,carboxymethylflavin,celecoxib,COL4A2,curcumin,DEPDC5,FKBP1A,FNIP1,formylmethylflavin,geldanamycin,Hoxb3os,IRGM,KAT2A,lumichrome,mir-10,miR-199a-3p (and other miRNAs w/seed CAGUAGU),miR-378a-3p (and other miRNAs w/seed CUGGACU),N-acetyl-L-cysteine,NDRG1,OSI-027,panulisib,PTPN11,riboflavin,rigosertib,samotolisib,STK11,te…		BIRC5,CCNE1,ESR1,HBA1/HBA2,hexokinase,HIF1A,HK2,HSF1,IgG,IL4,IL5,MAP2,mir-1,OXSR1,PKM,PRKCA,reactive oxygen species,RORC,SKP2,SREBF1,SREBF2	EGFR,HSP90B1,MEFV,MLXIPL,NFKB1,RB1CC1,RHOA
NR2F2	ligand-dependent nuclear receptor		3			-1.606	2.04e-13	0.0163	Akt,BHLHE40,BIRC5,CCND1,CDKN1A,CEBPA,CTNNB1,E2F1,EIF2AK3,ERBB2,GLI1,HIF1A,HNF4A,IGF1R,IL6,JUN,MTOR,NANOG,NFKB1,NFKBIA,NR2F2,POU5F1,PPARG,RB1,RELA,SNAI2,SP1,SREBF1,STAT3,TP53,TP73,TSC2	ACOT1,AHCY,ALDOC,APOE,ATP1A1,ATP5F1C,AVIL,CD9,CDC42,CNN3,COX6B1,CYCS,DBI,DPP7,EIF3I,FABP3,FABP5,FKBP4,FUBP1,GLRX,GSK3A,GSTO1,HINT1,HNRNPA2B1,HNRNPH1,HSPA5,HSPD1,HSPE1,ILK,ITGA2B,KHSRP,LASP1,LTB4R,MAPRE2,MMRN1,MPDU1,MPPE1,MT-CO2,NAP1L4,NAPA,NUCKS1,NUDC,NUDT21,OLR1,P4HB,PDIA6,PGP,PLEK,PLIN3,PPIA,PPIB,PSMA2,PSMD2,RAB8A,RAB8B,RBM3,RELA,RNASEL,RPL7,S100A9,SET,SH3KBP1,SRI,STK4,SYNE2,SYTL1,TAGLN2,TES,TH…	76 (32)	31	dimethyl sulfoxide	HEY1		TP53	aldosterone
GRK5	kinase		2			-1.98	2.15e-13	0.0007	ADRB,ADRB2,CCR5,EGFR,ERK1/2,F2R,GRK5,NFkB (complex),RELA,RHO,SNCA,TP53	ACTB,AHCY,APOE,ATP1A1,ATP5F1C,B2M,CCT5,CD55,CD9,CNN3,DBI,FABP5,FKBP4,FUBP1,GNB1,GSK3A,HNRNPA2B1,HNRNPD,HNRNPH1,HSP90B1,HSPD1,HSPE1,ILK,ITGA2B,LASP1,LTB4R,MAPRE2,MIF,NAP1L4,NUDC,P4HB,PABPC1,PDIA6,PPIA,PSMD2,PXN,RAB1B,RAB8A,RBM3,RELA,RPL7,SH3KBP1,SLC16A3,STK4,SYTL1,TAGLN2,UQCRC1,USO1,VWF,ZYX	50 (12)	12	ADCYAP1,ARRB2	heparin		EGFR,F2R,NFKB1	APP,TP53
MASP2	peptidase		3	Inhibited		-3.939	2.33e-13	0.0032	ADCY,Akt,AKT1,ATF1,C3,C5,Ca2+,CREB1,EGFR,ERK,F2,F5,FN1,IKBKB,JAK2,MAPK1,MASP2,MYC,NFkB (complex),NFKB1,NFKBIA,PAK2,PI3K (complex),PLCG1,PLG,RELA,RGS18,RHOA,SEPTIN5,SNAP23,SRC (family),STIM1,STK11,SYK,TGFB1,VEGFA	AHCY,ALDOC,APOE,ATP1A1,ATP5F1C,ATP5PO,AVIL,CBFB,CCT3,CCT5,CNN3,CORO1C,COX6B1,CTSZ,DBI,EIF4H,ERP29,FABP5,FKBP2,FUBP1,GLRX5,GSK3A,GSTO1,HINT1,HNRNPC,HNRNPD,HNRNPH1,HNRNPM,HSP90B1,HSPD1,HSPE1,ITGA2B,KHSRP,LASP1,MIF,MMRN1,MPDU1,MPPE1,MYL12A,NUDC,NUDT21,PABPC1,PDE4D,PEBP1,PPIA,PRKAR2B,RBM3,RBMX,RCSD1,RELA,SEPTIN2,SEPTIN7,SET,SF1,SLC16A3,SRI,STK4,SYTL1,TAGLN2,TES,THBS1,TREML1,TUBB1,UBE2I,UQCRC1,VWF	66 (36)	35				F2
SPOP	other		3			1.604	2.53e-13	0.0012	Akt,BRD4,CEBPA,corticosterone,ERK1/2,ERN1,ESR1,IRS2,MYC,NFkB (complex),NFKBIA,P38 MAPK,PRKCE,RELA,SPOP,XBP1	ACTB,AHCY,ATP1A1,B2M,CCT3,CD55,CDC42,COX6B1,CTSZ,DBI,DSC1,ERP29,ERP44,FABP5,FKBP2,GLRX,GLRX5,GNB1,GSK3A,HNRNPA2B1,HNRNPD,HNRNPH1,HSP90B1,HSPA5,HSPD1,HSPE1,ITGA2B,LTB4R,MMRN1,MPDU1,MPPE1,MT-CO2,NUDT21,OLR1,P4HB,PCYT1A,PDIA6,PGLS,PPIA,PPIB,RAB5B,RELA,RPL7,S100A9,SAMD9,SEC23A,SH3KBP1,SLC44A2,SYTL1,TAGLN2,TBCB,TES,THBS1,TMOD3,UBE2I,USO1	56 (16)	15	CD247,CD3,CGA				XBP1
pazopanib	chemical drug		3	Activated		2.425	2.58e-13	0.0031	AKT1,ATF4,CASP8,CD247,CD28,CD3,Cdc42,CDKN1B,Creb,CREB1,CSF1,CSF1R,CTNNB1,CXCL12,EGFR,EIF4E,ERBB2,ERBB3,ESR1,FGF2,FGFR1,FGFR2,FGFR3,FLT1,FLT4,HRAS,HSF1,ITK,JAK2,JUN,KDR,KIT,LCK,MITF,MTOR,MYC,NFE2L2,NFkB (complex),NFKBIA,pazopanib,PDGFRA,PDGFRB,PI3K (complex),PIK3R1,RB1,RET,SRC (family),STAT5B,TCR,TP53,YAP1,ZAP70	ACOT1,ACTB,AHCY,ATP1A1,ATP5F1C,ATP5PO,AVIL,CBFB,CCT5,CDC42,CNN3,COX6B1,CTSZ,CYCS,DBI,DNAJB1,DSC1,FABP5,FCER1G,FKBP2,FKBP4,FUBP1,GLRX5,GSK3A,GSTO1,HINT1,HNRNPH1,HNRNPM,HSP90B1,HSPA5,HSPD1,HSPE1,HUWE1,ITGA2B,LASP1,LTB4R,MAPRE2,MMP25,MMRN1,MPDU1,NAP1L4,NAPA,NUDC,NUDT21,PABPC1,PCYT1A,PDE4D,PDIA6,PGLS,PGP,PLIN3,PRKAR2B,PSMD2,PXN,RAB5B,RAB8A,RBM3,RBMX,RPL7,S100A9,SAMD9,SEC23A,SEPTIN7,SET,SH3KBP1,SLC44A…	75 (52)	43					FLT1
F2	peptidase		2	Inhibited		-4.032	2.82e-13	0.0052	ADCY,Akt,AKT1,ATF1,Ca2+,CREB1,EGFR,ERK,F2,F5,FN1,IKBKB,JAK2,JUN,MAPK1,MYC,NFkB (complex),NFKB1,NFKBIA,PAK2,PI3K (complex),PLCG1,PLG,RELA,RGS18,RHOA,SEPTIN5,SNAP23,SRC (family),SRF,STIM1,STK11,SYK,TGFB1,VEGFA	AHCY,ALDOC,ATP1A1,ATP5F1C,ATP5PO,AVIL,CBFB,CCT3,CCT5,CD55,CNN3,CORO1C,COX6B1,CTSZ,CYCS,DBI,EIF4H,ERP29,FABP5,FKBP2,FUBP1,GLRX5,GSK3A,GSTO1,HINT1,HNRNPC,HNRNPD,HNRNPH1,HNRNPM,HSP90B1,HSPD1,HSPE1,ITGA2B,KHSRP,LASP1,MIF,MMRN1,MPDU1,MPPE1,MYL12A,NUDC,NUDT21,PABPC1,PDE4D,PEBP1,PPIA,PRKAR2B,RBM3,RBMX,RCSD1,RELA,SEPTIN2,SEPTIN7,SET,SLC16A3,SRI,STK4,SYTL1,TAGLN2,TES,THBS1,TMOD3,TREML1,TUBB1,UBE2I,UQCRC1,…	67 (35)	35	elaidic acid,F3-F7,MASP2	ascorbic acid,bivalirudin,heparin,hyperforin,melagatran,miR-1-3p (and other miRNAs w/seed GGAAUGU),miR-30c-5p (and other miRNAs w/seed GUAAACA),SERPIND1,SERPINE2,simvastatin,TRH,ulinastatin		ANGPT2,APOA5,ATF1,BTK,CCN2,cholesterol,CYBB,Cyclin A,D-glucose,DGKQ,DST,EDN1,EGFR,F2R,FHL1,FLT1,FN1,FYN,GIT1,HIF1A,IL13,ITGA2B,JUN,NFKB1,PDE3A,PLA2G4A,PLCG1,PTPN11,reactive oxygen species,RGS18,RHOA,RNH1,RPS6KB1,SELP,SEPTIN5,SKP2,SPN,STK11,STXBP3,TNFSF10,VWF	ACAC,CXCR4,PRKACB
FBXL14	enzyme		3			0.239	2.93e-13	0.0084	Akt,ATF4,CCND1,CDK4/6,CDKN1A,CREB1,CTNNB1,F2,FBXL14,GCK,GLI1,MYC,MYOD1,NFKBIA,Pka,PTEN,RELA,SNAI1,STAT3,TAZ,TP53,TP73,TWIST1,YAP1	ACTB,AHCY,ALDOC,APOE,ATP5F1C,ATP5PO,CCT3,CD55,CD9,CDC42,CORO1C,COX6B1,CTSZ,CYCS,DBI,ERP29,FABP5,FKBP4,FUBP1,GLRX5,GSK3A,GSTO1,HNRNPA2B1,HNRNPD,HNRNPH1,HSPD1,HSPE1,HUWE1,ILK,LASP1,MAPRE2,MIF,MMP25,MPDU1,MPPE1,NAP1L4,NAPA,NUDT21,OLR1,P4HB,PDE4D,PEBP1,PLIN3,PPIA,PRKAR2B,PSMD2,PSMD6,PXN,RAB43,RAB8A,RAB8B,RBM3,RBMX,RNASEL,RPL7,SEC23A,SH3KBP1,SLC16A3,STK4,SYNCRIP,SYNE2,SYTL1,TAGLN2,TES,TUBB1,UBE2I,USO1…	70 (24)	23
eprenetapopt	chemical drug		3			1.501	2.96e-13	0.0092	AKT1,BHLHE40,BIRC5,CASP3,CCND1,CDKN1A,CEBPA,CTNNB1,E2F1,EIF2AK3,EIF4E,EP300,eprenetapopt,ERBB2,ERK1/2,GLI1,HIF1A,HNF4A,IGF1R,IL18,IL6,JUN,KAT2B,MTOR,NANOG,NFKB1,NFKBIA,PARP1,PPARG,PTEN,RB1,RELA,SP1,STAT3,TP53,TP73,TSC2	ACOT1,AHCY,ALDOC,APOE,ATP1A1,ATP5F1C,AVIL,B2M,CD9,CDC42,CNN3,COX6B1,DBI,DPP7,EIF3I,FABP3,FABP5,FKBP4,FUBP1,GSK3A,GSTO1,HINT1,HNRNPA2B1,HNRNPM,HSPA5,HSPD1,HSPE1,ILK,ITGA2B,KHSRP,LASP1,LTB4R,MAPRE2,MMRN1,MPDU1,MT-CO2,NAP1L4,NAPA,NUCKS1,NUDC,P4HB,PDIA6,PGP,PLEK,PLIN3,PPIA,PPIB,PSMA2,PSMD2,RAB43,RAB8A,RAB8B,RBM3,RELA,RNASEL,RPL7,SEC23A,SET,SH3KBP1,SRI,STK4,SYNCRIP,SYNE2,SYTL1,TAGLN2,TES,THBS1,TMOD3,T…	75 (37)	35				XBP1	TP53
CYP1A2	enzyme		3			0.585	3.21e-13	0.0041	2-amino-1-methyl-6-phenylimidazo-4-5-b-pyridine,9,10-dimethyl-1,2-benzanthracene,AHR,AKT1,AR,benzo(a)pyrene,CCNE1,Creb,CREB1,CYP1A2,EGFR,ERBB2,ESR1,HDAC3,HIF1A,HRAS,MAPK1,MTOR,NCOA2,NFKBIA,Pka,REL,RELA,SMAD3,SRC (family),SREBF2,STAT3,STAT5a/b,STUB1,TP53	ACOT1,ACTB,AHCY,ATP1A1,ATP5F1C,ATP5PO,ATP6AP1,AVIL,B2M,CCT3,CCT5,CD55,CD9,CNN3,COX6B1,CTSZ,DBI,DNAJB1,DNM3,DSC1,ERP29,FABP5,FKBP4,FUBP1,GNB1,GSTO1,HNRNPH1,HNRNPM,HSP90B1,HSPA5,HSPD1,HSPE1,HUWE1,LASP1,MAPRE2,MINPP1,MPDU1,MT-CO2,NAP1L4,NUCKS1,NUDC,OLR1,PABPC1,PCYT1A,PDE4D,PDIA6,PGLS,PGP,PLIN3,PPIA,PPIB,PRKAR2B,PSMA2,PSMD2,PXN,RAB5B,RAB8A,RBM3,RBMX,RPL7,SAMD9,SH3KBP1,SLC44A2,STK4,SYTL1,THBS1,TMOD3,T…	73 (30)	27	3-nitrobenzanthrone,AHR,ethoxyquin,IL5,LGR4,LGR5,mir-122,pantoprazole,SMAD7,XBP1	3,3'-diindolylmethane,avasimibe,curcumin,ERN1,Insulin,pifithrin alpha,rosiglitazone,tunicamycin		2-amino-1-methyl-6-phenylimidazo-4-5-b-pyridine	NQO1
GCSAM	other		3			-0.896	3.24e-13	0.0021	Akt,AKT1,ARHGEF11,Cdc42,CHUK,Creb,ECT2,GCSAM,HRAS,IKBKB,IRF4,MAP3K8,MAPK1,MAPK8,MRTFA,MYC,NFATC1,NFkB (complex),NFKB1,P38 MAPK,PI3K (complex),PLD2,PPARG,PRKCA,PRKCB,PTEN,RELA,RHOA,ROCK,ROCK2,SMAD3,SRF,STAT3,STAT5a/b,Tgf beta,TP53	AHCY,ATP1A1,ATP5F1C,ATP5PO,CCT3,CD9,CDC42,CNN3,COX6B1,CTSZ,CYCS,DSC1,ERP29,FABP3,FKBP4,FUBP1,GLRX5,GNB1,GSK3A,HNRNPD,HNRNPH1,HNRNPM,HSP90B1,HSPD1,HSPE1,KHSRP,LASP1,LTB4R,MAPRE2,MIF,MPPE1,NAP1L4,NUDT21,P4HB,PCYT1A,PDIA6,PLIN3,PPIA,PPIB,PRKAR2B,PSMA2,PSMD2,RAB43,RAB8A,RBM3,RCSD1,SEC23A,SH3KBP1,SLC16A3,STK4,SYNCRIP,SYTL1,TAGLN2,TES,THBS1,TMOD3,TUBB1,UBE2I,UQCRC1,USO1,VWF	61 (36)	34				RHOA
ECM1	transporter		3	Inhibited		-3.2	3.45e-13	0.0026	AKT1,CASP8,CTNNB1,ECM1,EGFR,FN1,HRAS,IGF1R,IKZF1,INSR,MAPK1,MAPK8,MAPK9,MMP3,MTOR,NFkB (complex),NFKB1,P38 MAPK,PI3K (complex),PRKCA,RELA,SFPQ,SRC (family),STAT5a/b,STAT5B,TGFB1,THRAP3,TLR4,TP53,UBA1,YAP1	ACOT1,ACTB,AHCY,APOE,ATP1A1,ATP5F1C,AVIL,CCT5,CDC42,CNN3,CORO1C,DBI,DDX17,DNM3,EIF4H,ERP29,FABP5,FKBP2,FKBP4,FUBP1,GNB1,GSK3A,HNRNPC,HNRNPD,HNRNPH1,HNRNPM,HSPE1,ITGA2B,KHSRP,LASP1,MAPRE2,MIF,MMP25,MMRN1,MYL12A,NAP1L4,NUDC,NUDT21,PABPC1,PDE4D,PGP,PLEK,PLIN3,PPIA,PPIB,PRKAR2B,PSMD2,PXN,RAB8A,RBM3,S100A9,SF1,SH3KBP1,SLC16A3,SRI,STK4,SYNCRIP,SYTL1,TAGLN2,THBS1,TMOD3,TUBB1,U2AF1/U2AF1L5,UBE2I,USO1,VWF	66 (31)	30	BHLHE40,PRL,TP53			FN1,ZEB1
ACAN	other		3			-0.882	3.48e-13	0.0025	ACAN,AGER,Akt,AKT1,CHUK,Creb,EGFR,ERN1,IKBKB,IL10RA,IL6,JUN,MAPK1,MAPK8,MAPK9,MTOR,MYD88,NFkB (complex),NFKB1,NFKBIA,NFKBIB,P38 MAPK,PI3K (complex),PLCG1,PRKCA,RB1,RELA,SP1,STAT3,STAT5a/b,TLR2,TLR9,TP53,TP73,XBP1	AHCY,ALDOC,ATP5F1C,AVIL,CCT5,CD9,COX6B1,CTSZ,CYCS,DBI,ERP29,ERP44,FKBP2,FKBP4,FUBP1,GLRX,GLRX3,GSK3A,HINT1,HNRNPA2B1,HNRNPD,HNRNPH1,HNRNPM,HSPD1,HSPE1,ITGA2B,KHSRP,LTB4R,MAPRE2,MIF,MMP25,MPDU1,MPPE1,NAP1L4,NUDC,OLR1,PABPC1,PCYT1A,PGP,PLEK,PLIN3,PPIA,PRKAR2B,PSMD2,PXN,RAB8A,RBM3,RELA,RPL7,S100A9,SEC23A,SH3KBP1,SLC16A3,STK4,SYNE2,SYTL1,TAGLN2,TBCB,TUBB1,UBE2I,UQCRC1,USO1,VWF	63 (35)	34	BCL6,CCN2,CRYAB,HIF1A
gossypol	chemical drug		3			-0.114	3.58e-13	0.004	26s Proteasome,Akt,AKT1,BCL2,BHLHE40,BIRC5,CCND1,CDKN1A,CEBPA,CTNNB1,E2F1,EGFR,EIF2AK3,ERBB2,ESR1,ESR2,GLI1,gossypol,HIF1A,HNF4A,IGF1R,IL6,MAPK1,MTOR,NANOG,NCOA1,NCOA3,NFKB1,PARP1,PPARD,PPARG,SOX2,STAT3,STAT5a/b,TP53,TP73,TSC2,YAP1	ACOT1,AHCY,ALDOC,APOE,ATP1A1,ATP5F1C,AVIL,CCT5,CD9,CDC42,CNN3,DBI,DPP7,DSC1,EIF3I,ERP29,FABP3,FABP5,FKBP4,FUBP1,GNB1,GSK3A,GSTO1,HNRNPD,HNRNPM,HSPA5,HSPD1,ITGA2B,KHSRP,LASP1,LTB4R,MAPRE2,MMP25,MPPE1,MT-CO2,MYL12A,NAP1L4,NUCKS1,NUDT21,P4HB,PABPC1,PDIA6,PGLS,PGP,PLEK,PLIN3,PPIA,PPIB,PSMA2,PSMD2,PSMD6,RAB5B,RAB8A,RAB8B,RBM3,RELA,RNASEL,RPL7,SAMD9,SEPTIN2,SET,SLC16A3,SLC44A2,SRI,SYNCRIP,SYNE2,TAGLN2,…	77 (38)	36				TP53
MLXIPL	transcription regulator		3			1.238	3.59e-13	0.0074	26s Proteasome,Akt,AURKA,BHLHE40,BIRC5,BRCA1,CCND1,CDKN1A,CEBPA,E2F1,EIF2AK3,EIF4E,EP300,ERBB2,ERK1/2,ESR1,GLI1,HIF1A,HNF4A,HSF1,IGF1R,IL6,IRF3,KAT2B,MLXIPL,MTOR,MYC,NANOG,NFKB1,PDK,PLK1,PPARG,PTEN,RASSF1,RELA,SDCBP,SP1,STAT3,TP53,TP63,TP73,TSC2	ACOT1,AHCY,ALDOC,APOE,ATP1A1,ATP5F1C,AVIL,B2M,CCT5,CD9,CDC42,CNN3,DBI,DNAJB1,DPP7,DSC1,EIF3I,FABP3,FABP5,FKBP4,FUBP1,GLRX5,GNB1,GSK3A,GSTO1,HINT1,HNRNPD,HSPA5,HSPD1,ILK,ITGA2B,KHSRP,LASP1,LTB4R,MAPRE2,MMRN1,MPPE1,MT-CO2,NAP1L4,NAPA,NUCKS1,NUDC,P4HB,PDIA6,PEBP1,PGLS,PGP,PLEK,PPIA,PPIB,PSMA2,PSMD2,PSMD6,RAB43,RAB5B,RAB8A,RAB8B,RBM3,RELA,RNASEL,RPL7,SAMD9,SEC23A,SET,SH3KBP1,SRI,SYNCRIP,SYNE2,SYTL1,T…	79 (42)	39	Insulin,methylprednisolone	APOA1,ERN1,INSIG1,linoleic acid,MTOR		ACAC,AURKA,cholesterol,HIF1A,PLK1,RPL11,RPL22,RPS14,RPS19,SREBF1,TXNIP	TP53
FFAR3	G-protein coupled receptor		3	Inhibited		-2.092	4e-13	0.0085	Akt,AKT1,BHLHE40,BIRC5,CCND1,CDKN1A,CEBPA,CTNNB1,cyclic AMP,E2F1,EGFR,EIF2AK3,ERBB2,FFAR3,G protein alphai,GLI1,HIF1A,HNF4A,IGF1R,IL6,JUN,MAPK1,MTOR,NANOG,NFKB1,NFKBIA,Pka,PPARG,RB1,RELA,SP1,STAT3,TP53,TP73,TSC2	ACOT1,AHCY,ALDOC,APOE,ATP1A1,ATP5F1C,AVIL,CCT5,CD9,CDC42,CNN3,COX6B1,DBI,DPP7,EIF3I,ERP29,FABP3,FABP5,FKBP4,FUBP1,GSK3A,GSTO1,HINT1,HNRNPA2B1,HNRNPD,HNRNPH1,HNRNPM,HSPA5,HSPD1,HSPE1,ILK,ITGA2B,KHSRP,LASP1,LTB4R,MAPRE2,MMRN1,MPDU1,MPPE1,MT-CO2,NAP1L4,NAPA,NUCKS1,NUDC,P4HB,PABPC1,PDE4D,PDIA6,PGP,PLEK,PLIN3,PPIB,PSMA2,PSMD2,RAB8A,RAB8B,RBM3,RELA,RNASEL,RPL7,SET,SH3KBP1,SRI,STK4,SYNE2,SYTL1,TAGLN2,TE…	74 (35)	34	TGM2			TP53	ANPEP
AMD1	enzyme		3			-1.213	4.22e-13	0.002	Akt,AKT1,AMD1,AR,BAX,BRCA1,CCND1,CDK4,CEBPA,E2F3,EGFR,EIF4EBP1,ERK,FLNA,GLI1,HBEGF,MAPK1,MAPK8,MMP2,MTOR,MYC,NRF1,PLAU,PLG,PPARG,RB1,ROCK2,RUNX3,SP1,SREBF1,SREBF2,STAT4,TFE3,TFEB,Tgf beta,TGFB1,TP73,TSC1,TSC2,WT1	ALDOC,APRT,ATP5PO,ATP6AP1,AVIL,CBFB,CCT5,CD55,CORO1C,DBI,DPP7,DSC1,EIF4H,ERP29,FKBP2,FKBP4,FUBP1,GLRX,GLRX5,HINT1,HNRNPA2B1,HNRNPC,HNRNPD,HNRNPH1,HNRNPM,HSPA5,HSPD1,HSPE1,HUWE1,ILK,ITGA2B,LASP1,LTB4R,MIF,MMRN1,MPPE1,MYL12A,NUCKS1,NUDC,NUDT21,OLR1,PABPC1,PCYT1A,PDE4D,PDIA6,PGP,PLIN3,PPIA,PSMC6,PSMD6,PXN,RAB8B,RBM3,RNASEL,RPL7,S100A9,SLC16A3,SRI,STK4,SYNE2,TAGLN2,TES,TMOD3,TUBB1,UBE2I,UQCRC1,USO1,Z…	68 (40)	37	COPS5,EGFR,mibolerone	GABA			reactive oxygen species
ZNF148	transcription regulator		3			-1.732	4.34e-13	0.0055	Akt,AKT1,BHLHE40,BIRC5,CASP3,CASP8,CCND1,CDKN1A,CEBPA,CTNNB1,DICER1,E2F1,EIF2AK3,ERBB2,GLI1,HIF1A,HNF4A,IGF1R,IL6,JUN,MTOR,NANOG,NFKB1,NFKBIA,PARP1,PPARG,PTEN,RB1,RELA,SP1,STAT3,TP53,TP73,TSC2,ZNF148	ACOT1,AHCY,ALDOC,APOE,ATP1A1,ATP5F1C,AVIL,CD9,CDC42,CNN3,COX6B1,DBI,DPP7,EIF3I,FABP3,FABP5,FKBP4,FUBP1,GSK3A,GSTO1,HINT1,HNRNPA2B1,HNRNPH1,HNRNPM,HSPA5,HSPD1,HSPE1,ILK,ITGA2B,KHSRP,LASP1,LTB4R,MAPRE2,MMRN1,MPDU1,MPPE1,MT-CO2,NAP1L4,NAPA,NUCKS1,NUDC,P4HB,PDIA6,PGP,PLEK,PLIN3,PPIA,PPIB,PSMA2,PSMD2,RAB43,RAB8A,RAB8B,RBM3,RELA,RNASEL,RPL7,S100A9,SEC23A,SH3KBP1,SRI,SYNCRIP,SYNE2,SYTL1,TAGLN2,TES,THBS1…	75 (35)	33		CDK4/6,ID1		TP53	FN1
MSH6	enzyme		3			-1.627	4.7e-13	0.0152	Akt,AKT1,BHLHE40,BIRC5,CCND1,CDKN1A,CEBPA,CTNNB1,E2F1,EIF2AK3,EIF4E,EP300,ERBB2,ERK1/2,GLI1,HIF1A,HNF4A,IGF1R,IL6,JUN,KAT2B,MSH6,MTOR,NANOG,NFKB1,NFKBIA,PARP1,PCNA,PPARG,RB1,RELA,SP1,STAT3,TP53,TP73,TSC2	ACOT1,AHCY,ALDOC,APOE,ATP1A1,ATP5F1C,AVIL,B2M,CD9,CDC42,CNN3,COX6B1,DBI,DPP7,EIF3I,FABP3,FABP5,FKBP4,FUBP1,GSK3A,GSTO1,HINT1,HNRNPA2B1,HNRNPH1,HNRNPM,HSPA5,HSPD1,HSPE1,ILK,ITGA2B,KHSRP,LASP1,LTB4R,MAPRE2,MMRN1,MPDU1,MPPE1,MT-CO2,NAP1L4,NAPA,NUCKS1,NUDC,P4HB,PDIA6,PGP,PLEK,PLIN3,PPIA,PPIB,PSMA2,PSMD2,RAB8A,RAB8B,RBM3,RELA,RNASEL,RPL7,SET,SH3KBP1,SRI,STK4,SYNE2,SYTL1,TAGLN2,TES,THBS1,TMOD3,TUBB1,UB…	74 (36)	34	CSNK2A1	temozolomide
barasertib	chemical drug		3			-1.86	5.01e-13	0.0151	Akt,AKT1,AURKB,barasertib,BHLHE40,BIRC5,CCND1,CDKN1A,CEBPA,CTNNB1,E2F1,EIF2AK3,EIF4E,EP300,ERBB2,ERK1/2,GLI1,HIF1A,HNF4A,IGF1R,IL6,JUN,KAT2B,MTOR,NANOG,NFKB1,NFKBIA,PKM,PPARG,RASSF1,RB1,RELA,SP1,STAT3,TP53,TP73,TSC2	ACOT1,AHCY,ALDOC,APOE,ATP1A1,ATP5F1C,AVIL,B2M,CD9,CDC42,CNN3,COX6B1,DBI,DPP7,EIF3I,FABP3,FABP5,FKBP4,FUBP1,GSK3A,GSTO1,HINT1,HNRNPA2B1,HNRNPH1,HNRNPM,HSPA5,HSPD1,HSPE1,ILK,ITGA2B,KHSRP,LASP1,LTB4R,MAPRE2,MMRN1,MPDU1,MPPE1,MT-CO2,NAP1L4,NAPA,NUCKS1,NUDC,P4HB,PDIA6,PGLS,PGP,PLEK,PLIN3,PPIA,PPIB,PSMA2,PSMD2,RAB8A,RAB8B,RBM3,RELA,RNASEL,RPL7,SET,SH3KBP1,SRI,STK4,SYNE2,SYTL1,TAGLN2,TES,THBS1,TUBB1,UBE…	74 (37)	35				TP53
SYVN1	transporter		3	Activated		3.212	5.1e-13	0.0101	26s Proteasome,BHLHE40,BIRC5,CCND1,CDKN1A,CEBPA,CEBPB,CTNNB1,E2F1,EIF2AK3,ERBB2,ERN1,GLI1,HFE,HMGCR,HNF4A,HTT,IGF1R,IL6,MYC,NANOG,NFKB1,PKM,PPARG,RB1,RELA,SIRT2,SP1,STAT3,SYVN1,TP53,TP73,TSC2,XBP1,YAP1	ACOT1,AHCY,APOE,ATP1A1,ATP1B3,ATP5F1C,ATP6AP1,B2M,CCT3,CD9,CDC42,CNN3,COX6B1,DBI,DPP7,EIF3I,ERP29,ERP44,FABP3,FABP5,FKBP2,FKBP4,FUBP1,GLRX5,GSK3A,GSTO1,HINT1,HNRNPD,HNRNPH1,HNRNPM,HSP90B1,HSPD1,HSPE1,ILK,ITGA2B,KHSRP,LASP1,LTB4R,MAPRE2,MMP25,MMRN1,MT-CO2,NAP1L4,NAPA,NUDC,NUDT21,OLR1,P4HB,PDIA6,PGLS,PLEK,PLIN3,PSMA2,PSMD2,PSMD6,RAB8A,RAB8B,RBM3,RELA,RNASEL,RPL7,SEC23A,SET,SH3KBP1,SRI,STK4,SYNE2,SY…	76 (35)	32	dithiothreitol,EIF2AK3,mir-10,thapsigargin,tunicamycin,XBP1			AHR,BHLHE40,CDA,ITGAV,PSMC3,reactive oxygen species,SLC7A5,USP5	APP,TP53
ING1	transcription regulator		3			-1.732	5.3e-13	0.0114	Akt,AKT1,BHLHE40,BIRC5,CASP3,CCND1,CDKN1A,CEBPA,CTNNB1,DICER1,E2F1,EIF2AK3,EIF4E,EP300,ERBB2,ERK1/2,GLI1,HIF1A,HNF4A,IGF1R,IL6,ING1,JUN,KAT2B,MTOR,NANOG,NFKB1,NFKBIA,PCNA,PPARG,PTEN,RB1,RELA,SP1,STAT3,TP53,TP73,TSC2	ACOT1,AHCY,ALDOC,APOE,ATP1A1,ATP5F1C,AVIL,B2M,CD9,CDC42,CNN3,COX6B1,DBI,DPP7,EIF3I,FABP3,FABP5,FKBP4,FUBP1,GSK3A,GSTO1,HINT1,HNRNPA2B1,HNRNPH1,HNRNPM,HSPA5,HSPD1,HSPE1,ILK,ITGA2B,KHSRP,LASP1,LTB4R,MAPRE2,MMRN1,MPDU1,MPPE1,MT-CO2,NAP1L4,NAPA,NUCKS1,NUDC,P4HB,PDIA6,PGP,PLEK,PLIN3,PPIA,PPIB,PSMA2,PSMD2,RAB43,RAB8A,RAB8B,RBM3,RELA,RNASEL,RPL7,SEC23A,SH3KBP1,SRI,STK4,SYNCRIP,SYNE2,SYTL1,TAGLN2,TES,THB…	75 (38)	35	budesonide,CHEK1			HSPA1A/HSPA1B,RPS14,TP53	CCNB1,ERN1
N-acetyl-L-cysteine	chemical drug		2	Activated		4.454	5.33e-13	0.0048	Akt,AKT1,CTNNB1,DICER1,EGFR,EIF2AK3,HIF1A,HRAS,INSR,JAK2,JUN,MAPK1,MTOR,N-acetyl-L-cysteine,NFE2L2,NFkB (complex),NFKB1,NFKBIA,PDX1,PI3K (complex),PKM,PLCG1,PRKCA,PRKCB,RB1,RELA,SMAD3,STAT6,SYK,TARDBP,TGFB1,TGM2,TP53	ACTB,AHCY,ALDOC,ATP1A1,ATP1B3,ATP5F1C,ATP5PO,CBFB,CCT3,CCT5,CNN3,CORO1C,COX6B1,CTSZ,CYCS,DBI,EIF4H,FABP5,FKBP2,FKBP4,FUBP1,GNB1,GSK3A,GSTO1,HINT1,HNRNPC,HNRNPD,HNRNPH1,HNRNPH3,HNRNPM,HSPE1,HUWE1,KHSRP,LASP1,LTB4R,MAPRE2,MPDU1,MPPE1,MYL12A,NAP1L4,NAPA,NUCKS1,NUDC,P4HB,PABPC1,PCYT1A,PDE4D,PGLS,PGP,PLIN3,PSMD2,PXN,RAB8A,RBM3,RCSD1,RELA,RNASEL,RPL7,SEC23A,SET,SH3KBP1,SRI,STK4,SYTL1,TAGLN2,TES,UBE2I,V…	69 (33)	33				BACH1,CCN2,DNA-PK,glutathione peroxidase,HK2,Insulin,PKM,thiol	ABL1,CHEK1,CHEK2,CLDN7,CXCR4,CYBB,EDN1,EGFR,EIF2A,EIF2AK3,FYN,GZMB,HIF1A,IgG,IL5,JUN,mir-34,MPO,MTOR,MUC5AC,NFAT (complex),NFKB1,NQO1,PI3K (family),PLCG1,PRKCA,PSEN2,PTPN11,reactive oxygen species,RHOA,RPS6KB1,SELP,TGM2,TP53,TXN,TXNIP
CCNB1	kinase		3			-1.026	5.35e-13	0.0019	ADRB2,AKAP12,BARD1,BCL2L1,BHLHE40,BIRC5,CCNB1,CDC25A,CDK1,CDKN1A,CDKN1B,CEBPA,E2F1,EGFR,EIF2AK3,ERBB2,ESR1,GLI1,HIF1A,HISTONE,HMGA1,HNF4A,HRAS,HSF1,IREB2,JAK2,JUNB,KAT5,MAPK1,MAPT,MASTL,MTOR,MYC,NANOG,NFKB1,PPARG,PTEN,RELA,SOX2,SP1,TLR9,TP53,TP73,TSC2,VEGFA,YAP1	ACOT1,AHCY,ALDOC,APOE,ATP1A1,ATP5F1C,AVIL,B2M,CBFB,CCT5,CNN3,CYCS,DBI,DNAJB1,DPP7,DSC1,EIF3I,ERP29,FABP3,FABP5,FKBP4,FUBP1,GLRX3,GLRX5,GNB1,GSK3A,GSTO1,HINT1,HSPD1,ILK,ITGA2B,KHSRP,LASP1,LTB4R,MAPRE2,MMP25,MMRN1,MT-CO2,MYL12A,NAP1L4,NAPA,NUCKS1,P4HB,PABPC1,PDIA6,PGLS,PGP,PPIB,PSMD2,PSMD6,RAB11FIP1,RAB1B,RAB43,RAB5B,RAB8A,RAB8B,RBM3,RELA,RPL7,S100A9,SAMD9,SEC23A,SEPTIN2,SET,SH3KBP1,SLC44A2,SRI,STK…	77 (46)	39	ACKR3,ACTL6A,AHR,bortezomib,CCNE1,CSNK2A1,docetaxel,ESR1,HAS1,LATS2,NFYA,PINK1,PLK1,PRL,proTAME,RABL6,RBCK1,RHOA,SMAD7	4-hydroxynonenal,caffeine,CDC14A,CDC20,CEBPD,CHEK1,curcumin,D-glucose,DNM1L,farnesol,ING1,LGALS1,Rbx1,silibinin,UBE2D2,vorinostat		BIRC5,BUB1	BARD1
arsenite	chemical toxicant		2	Inhibited		-2.142	5.55e-13	0.0032	Akt,AKT1,arsenite,BAK1,BAX,CDK4/6,CREB1,EGFR,ESR1,HSF1,JUN,MAP3K8,MAPK1,MAPK8,MAPK9,MTOR,NFkB (complex),NFKBIA,P38 MAPK,SRF,TP53	AHCY,ATP1A1,ATP5F1C,AVIL,CCT3,CCT5,CD55,CD9,CDC42,CNN3,CYCS,DBI,DNAJB1,DSC1,ERP29,FABP5,FUBP1,GNB1,GSK3A,HNRNPD,HNRNPH1,HNRNPM,HSPE1,ILK,LASP1,LTB4R,MAPRE2,MIF,MPDU1,MPPE1,NAP1L4,NUDC,OLR1,P4HB,PABPC1,PCYT1A,PDIA6,PGLS,PGP,PPIA,PPIB,PRKAR2B,PSMD2,PXN,RAB5B,RAB8A,RBM3,RBMX,RCSD1,RPL7,S100A9,SAMD9,SH3KBP1,SLC44A2,STK4,TAGLN2,TMOD3,TUBB1,UBE2I,UQCRC1,USO1,WIPF1,ZYX	63 (21)	20				APEX1,CRYAB,EGFR,EIF2A,ESR1,HSF1,JUN,MTOR,MTORC1,NQO1,reactive oxygen species,RPS6KB1,TP53,TXNRD1	ATR,CDK4/6,RNH1
Plexin A	group		3	Inhibited		-3.201	5.73e-13	0.0048	Akt,AKT1,Alpha catenin,CD247,CD28,CTNNB1,EGFR,ERK,ERN1,FYN,GAB2,HRAS,IKBKB,IRF3,JAK2,KIT,MAP2,MAPK1,MAPK8,MYC,NFE2L2,NFkB (complex),P38 MAPK,PAK2,PI3K (complex),PIK3R1,Pkc(s),PLCG1,PLCG2,Plexin A,Rac,ROCK2,SNCA,SRF,STAT3,SYK,ZAP70,ZNF106	AHCY,ALDOC,ATP1A1,ATP5F1C,ATP5PO,CCT3,CCT5,CD55,CD9,COX6B1,CTSZ,DBI,DSC1,FABP5,FKBP2,GLRX,GLRX5,GNB1,GSTO1,HINT1,HNRNPD,HNRNPH1,HNRNPM,HSPE1,HUWE1,ILK,ITGA2B,LASP1,MIF,MMRN1,MPPE1,NUDC,NUDT21,OLR1,P4HB,PABPC1,PCYT1A,PDE4D,PDIA6,PLIN3,PPIA,PPIB,PRKAR2B,PXN,RBM3,RCSD1,RPL7,SEC23A,SET,SLC16A3,STK4,TAGLN2,TBCB,TES,TMOD3,TUBB1,UBE2I,UQCRC1,USO1,VPS4B,ZYX	61 (38)	35
MCC	complex		3			-0.762	5.74e-13	0.0003	APC,APC (complex),BCL2L1,BUB1B,BUB3,CDC20,CDKN1A,Cyclin A,cytarabine,E2F1,GMNN,HSF2,MCC,PTTG1,RASSF1,TP53	AHCY,ATP1A1,ATP5F1C,B2M,CCT3,CCT5,CD55,CD9,CNN3,CYCS,DBI,EIF3I,FABP5,FKBP4,FUBP1,GSK3A,GSTO1,HSP90B1,HSPD1,HSPE1,ILK,ITGA2B,LASP1,LTB4R,MAPRE2,MIF,MT-CO2,NAP1L4,NUDC,NUDT21,P4HB,PCYT1A,PDIA6,PSMD2,RAB8A,RBM3,RELA,RPL7,TAGLN2,TUBB1,UQCRC1,USO1,ZYX	43 (16)	11
BACH2	transcription regulator		3			-1.86	6.32e-13	0.0182	Akt,AKT1,BACH2,BHLHE40,BIRC5,CCND1,CDKN1A,CEBPA,CTNNB1,E2F1,EIF2AK3,EIF4E,EP300,ERBB2,ERK1/2,GLI1,HIF1A,HNF4A,IGF1R,IL6,JUN,KAT2B,MTOR,NANOG,NFKB1,NFKBIA,PPARG,RB1,RELA,SP1,STAT3,TP53,TP73,TSC2	ACOT1,AHCY,ALDOC,APOE,ATP1A1,ATP5F1C,AVIL,B2M,CD9,CDC42,CNN3,COX6B1,DBI,DPP7,EIF3I,FABP3,FABP5,FKBP4,FUBP1,GSK3A,GSTO1,HINT1,HNRNPA2B1,HNRNPH1,HNRNPM,HSPA5,HSPD1,HSPE1,ILK,ITGA2B,KHSRP,LASP1,LTB4R,MAPRE2,MMRN1,MPDU1,MPPE1,MT-CO2,NAP1L4,NAPA,NUCKS1,NUDC,P4HB,PDIA6,PGP,PLEK,PLIN3,PPIA,PPIB,PSMA2,PSMD2,RAB8A,RAB8B,RBM3,RELA,RNASEL,RPL7,S100A9,SET,SH3KBP1,SRI,STK4,SYNE2,SYTL1,TAGLN2,TES,THBS1,TUBB1,U…	74 (34)	34		EFNA2,HIF1A,miR-122-5p (miRNAs w/seed GGAGUGU)		BATF,JUN,RORC,TP53	AHR,IL13,IL4,IL5,XBP1
1-((2-chlorophenyl)diphenylmethyl)-1H-pyrazole	chemical reagent		3	Activated		4.185	6.53e-13	0.0039	1-((2-chlorophenyl)diphenylmethyl)-1H-pyrazole,AKT1,AR,BAX,BRCA1,CASP3,CDK2,Creb,cyclophosphamide,CYP2B6,CYP2C19,CYP2C9,CYP3A4,DICER1,diclofenac,docetaxel,EGFR,ERBB2,ERN1,ESR1,IGF1,IGF1R,KCNN4,MAPK1,MAPK7,MAPK8,MAPK9,MTOR,NFkB (complex),NFKBIA,PARP1,PI3K (complex),PRKCA,PRL,PTEN,RB1,RELA,SMAD2,SP1,STAT5a/b,STAT5B,TGFB1,TP53,ZAP70	ACOT1,ACTB,AHCY,ALDOC,ATP5PO,ATP6AP1,AVIL,B2M,CBFB,CCT3,CCT5,CNN3,CORO1C,COX6B1,CTSZ,CYCS,DBI,DNAJB1,DSC1,EIF4H,ERP29,FABP5,FKBP2,GNB1,GSK3A,HNRNPA2B1,HNRNPC,HNRNPD,HNRNPH1,HNRNPM,HSPD1,HSPE1,LASP1,MAPRE2,MIF,MMRN1,MPDU1,MYL12A,NAP1L4,NUDC,P4HB,PABPC1,PCYT1A,PDE4D,PDIA6,PEBP1,PGLS,PGP,PLEK,PLIN3,PPIB,PRKAR2B,PSMD2,PXN,RAB43,RAB5B,RAB8A,RBM3,RPL7,SAMD9,SH3KBP1,SLC44A2,SRI,STK4,SYNCRIP,SYTL1,TAGLN2…	74 (44)	37					CYP2C9,PRL
USP29	peptidase		2			-1.761	6.65e-13	0.0001	HIF1A,MYC,MYCN,SNAI1,USP29	ACTB,AHCY,ALDOC,APOE,ATP5PO,B2M,CCT3,CD55,CDC42,COX6B1,CYCS,DBI,FABP5,GLRX5,HNRNPA2B1,HNRNPD,HNRNPH1,HSPA5,HSPD1,HSPE1,HUWE1,ITGA2B,MIF,MYL12A,NUCKS1,NUDT21,OLR1,PEBP1,PPIA,PRKAR2B,RELA,RPL7,SLC16A3,TAGLN2,TES,THBS1,UBE2I,UQCRC1,ZYX	39 (5)	4	4-phenylbutyric acid			HIF1A,PKM
BBS2	other		3			-0.342	6.83e-13	0.0079	AHR,Akt,AKT1,AR,BBS2,CCND1,CEBPA,Creb,CREB1,CREBBP,CSF2,cytokine,EGFR,EP300,ERBB2,ESR1,HIF1A,HNF4A,IKBKB,IL1B,IL6,IRF3,IRF4,JUN,MAPK1,MAPK8,NCOA2,NFkB (complex),NFKB1,NFKBIA,NOS2,Pka,PPARG,REL,RELA,SP1,STAT1,STAT4,STUB1,TP53	ACOT1,APOE,ATP5F1C,ATP5PO,ATP6AP1,B2M,CCT3,CCT5,CD55,CD9,CNN3,COX6B1,CYCS,DNAJB1,DNM3,DSC1,ERP29,FABP3,FABP5,FKBP4,FUBP1,GLRX,GNB1,GSTO1,HINT1,HNRNPA2B1,HNRNPH1,HNRNPM,HSPA5,HSPD1,HSPE1,HUWE1,ILK,KHSRP,MAPRE2,MIF,MINPP1,MMP25,MMRN1,MPDU1,MPPE1,MT-CO2,NAP1L4,NUCKS1,NUDC,OLR1,PABPC1,PDE4D,PDIA6,PGLS,PGP,PLEK,PLIN3,PPIA,PPIB,PRKAR2B,PSMA2,PSMD2,PXN,RAB5B,RAB8A,RBM3,RBMX,RELA,RPL7,SAMD9,SF1,SLC16A3,S…	77 (40)	39
MW167	chemical - protease inhibitor		3			1.963	6.95e-13	0.0167	Akt,AKT1,BACE1,BHLHE40,BIRC5,CCND1,CDKN1A,CEBPA,CREB1,CTNNB1,E2F1,EIF2AK3,EIF4E,EP300,ERBB2,ERK1/2,GLI1,HIF1A,HNF4A,IGF1R,IL6,JUN,KAT2B,MTOR,MW167,NANOG,NFKB1,NFKBIA,Pka,PPARG,RB1,RELA,SP1,STAT3,TP53,TP73,TSC2	ACOT1,AHCY,ALDOC,APOE,ATP1A1,ATP5F1C,AVIL,B2M,CD9,CDC42,CNN3,COX6B1,DBI,DPP7,EIF3I,FABP3,FABP5,FKBP4,FUBP1,GSK3A,GSTO1,HINT1,HNRNPA2B1,HNRNPH1,HNRNPM,HSPA5,HSPD1,HSPE1,ILK,ITGA2B,KHSRP,LASP1,LTB4R,MAPRE2,MMRN1,MPDU1,MPPE1,MT-CO2,NAP1L4,NAPA,NUCKS1,NUDC,P4HB,PDE4D,PDIA6,PGP,PLEK,PLIN3,PPIA,PPIB,PSMA2,PSMD2,RAB8A,RAB8B,RBM3,RBMX,RELA,RNASEL,RPL7,SET,SH3KBP1,SRI,STK4,SYNE2,SYTL1,TAGLN2,TES,THBS1,TUB…	75 (37)	35					TP53
plicamycin	chemical drug		3			-1.395	7.1e-13	0.0185	Akt,AKT1,BHLHE40,BIRC5,CCND1,CDKN1A,CEBPA,CTNNB1,E2F1,EIF2AK3,EIF4E,EP300,ERBB2,ERK1/2,GLI1,HIF1A,HNF4A,IGF1R,IL6,JUN,KAT2B,MTOR,NANOG,NFKB1,NFKBIA,plicamycin,PPARG,RB1,RELA,SP1,STAT3,TP53,TP73,TSC2	ACOT1,AHCY,ALDOC,APOE,ATP1A1,ATP5F1C,AVIL,B2M,CD9,CDC42,CNN3,COX6B1,DBI,DPP7,EIF3I,FABP3,FABP5,FKBP4,FUBP1,GSK3A,GSTO1,HINT1,HNRNPA2B1,HNRNPH1,HNRNPM,HSPA5,HSPD1,HSPE1,ILK,ITGA2B,KHSRP,LASP1,LTB4R,MAPRE2,MIF,MMRN1,MPDU1,MPPE1,MT-CO2,NAP1L4,NAPA,NUCKS1,NUDC,P4HB,PDIA6,PGP,PLEK,PLIN3,PPIA,PPIB,PSMA2,PSMD2,RAB8A,RAB8B,RBM3,RELA,RNASEL,RPL7,SET,SH3KBP1,SRI,STK4,SYNE2,SYTL1,TAGLN2,TES,THBS1,TUBB1,UBE2…	74 (34)	34				ID1,TP53	AHR,CA9,CCN2,cholesterol,EGFR,FYN,HIF1A,MUC5AC,SERPINE2,STX1A,VWF
CCN2	growth factor		2	Inhibited		-4.808	7.21e-13	0.0015	CCN2,CDKN1B,Creb,EGFR,ERK,FLI1,IGF1R,MAPK1,RELA,SRC (family),TGFB1,VEGFA	ACTB,APOE,ATP1A1,ATP5PO,CBFB,CCT5,CD9,CDC42,CNN3,CORO1C,COX6B1,CYCS,EIF4H,ERP29,FABP5,FKBP2,FUBP1,HINT1,HNRNPA2B1,HNRNPC,HNRNPD,HNRNPH1,HSP90B1,HSPE1,ILK,ITGA2B,LASP1,MT-CO2,MYL12A,NUDC,OLR1,PABPC1,PDE4D,PLIN3,PPIA,PXN,RBM3,RELA,S100A9,SET,SH3KBP1,SRI,STK4,SYTL1,TMOD3,UBE2I,UQCRC1,USO1,WIPF1,ZYX	50 (12)	12	5-hydroxytryptamine,aldosterone,bisphenol A,CLDN7,CYBB,D-glucose,EDN1,F2,F2R,HSF1,IL13,Immunoglobulin,methylprednisolone,mycophenolic acid,N-acetyl-L-cysteine,PRKCA,reactive oxygen species,RHOA,SREBF2,TEAD1,TFLLR,tributyrin,ZEB1	actinomycin D,bisindolylmaleimide iv,BQ 123,caffeine,curcumin,cyclosporin A,dasatinib,EFNA2,FSH,LATS,miR-30c-5p (and other miRNAs w/seed GUAAACA),plicamycin,PRKG1,rosiglitazone,silibinin,simvastatin,SMAD7,WT1,Y 27632,Z-LLL-CHO		ACAN,COL4A2,Collagen type IV,ESR1,Integrin,NFAT (complex),PTPN11
LATS	group		3			-1.627	7.25e-13	0.0106	Akt,BHLHE40,BIRC5,CCND1,CEBPA,E2F1,EIF2AK3,EIF4E,EP300,ERBB2,ERK1/2,GLI1,HIF1A,HNF4A,IGF1R,IL6,IRF3,KAT2B,LATS,LATS2,MTOR,NANOG,NFKB1,NFKBIA,PPARG,PTEN,RB1,RELA,SNAI1,SP1,SREBF2,STAT3,TAZ,TP53,TP73,TSC2,YAP/TAZ,YAP1	ACOT1,AHCY,ALDOC,APOE,ATP1A1,ATP5F1C,AVIL,B2M,CD9,CDC42,CNN3,COX6B1,DBI,DPP7,EIF3I,FABP3,FABP5,FKBP4,FUBP1,GSK3A,HINT1,HNRNPH1,HSPA5,HSPD1,HSPE1,ILK,ITGA2B,KHSRP,LASP1,LTB4R,MAPRE2,MMP25,MMRN1,MPDU1,MPPE1,MT-CO2,NAP1L4,NAPA,NUCKS1,NUDC,P4HB,PDIA6,PEBP1,PGP,PLEK,PPIA,PPIB,PSMA2,PSMD2,PSMD6,RAB43,RAB8A,RAB8B,RBM3,RELA,RNASEL,RPL7,SEC23A,SET,SH3KBP1,SRI,STK4,SYNCRIP,SYNE2,SYTL1,TAGLN2,TES,TUBB1,UBE2…	74 (38)	35	MOB1A			TP53	BIRC5,CCN2
miR-30c-5p (and other miRNAs w/seed GUAAACA)	mature microRNA		3	Activated		2.425	8.2e-13	0.0238	Akt,Alp,BHLHE40,BIRC5,CCND1,CDKN1A,CEBPA,E2F1,EIF2AK3,EIF4E,EP300,ERBB2,ERK1/2,GLI1,HIF1A,HNF4A,IGF1R,IL6,JUN,KAT2B,miR-30c-5p (and other miRNAs w/seed GUAAACA),MTOR,NANOG,NFKB1,PPARG,PRL,RB1,RELA,SP1,STAT3,TP53,TP73,TSC2	ACOT1,AHCY,ALDOC,APOE,ATP1A1,ATP5F1C,AVIL,B2M,CBFB,CD9,CDC42,CNN3,COX6B1,DBI,DPP7,EIF3I,FABP3,FABP5,FKBP4,FUBP1,GSK3A,GSTO1,HINT1,HNRNPA2B1,HNRNPH1,HNRNPM,HSPA5,HSPD1,HSPE1,ILK,ITGA2B,KHSRP,LASP1,LTB4R,MAPRE2,MMRN1,MPDU1,MPPE1,MT-CO2,NAP1L4,NAPA,NUCKS1,NUDC,P4HB,PDIA6,PGP,PLEK,PPIA,PPIB,PSMA2,PSMD2,RAB8A,RAB8B,RBM3,RELA,RNASEL,RPL7,SAMD9,SEC23A,SET,SH3KBP1,SRI,STK4,SYNE2,SYTL1,TAGLN2,TES,THBS1,TU…	75 (33)	32	5-fluorouracil,D-glucose,docetaxel	ALOX5,FSH,Insulin,PAX3-FOXO1			ANPEP,BCL6,CCN2,cholesterol,COL4A2,F2,HEY1,JUN,NCEH1,NT5E,PSEN1,STX1A,TP53
ARHGEF1/12	group		3			0.566	8.51e-13	0.0003	ARHGEF1,ARHGEF1/12,ARHGEF12,Cdc42,CHUK,ECT2,EGFR,F2R,HRAS,JUN,MAPK8,MRTFA,NFKB1,P38 MAPK,PI3K (complex),PLD2,PPARG,PRKCA,PRKCB,RELA,RHOA,SRF,STAT3,STAT5a/b,Tgf beta,TP53	ACTB,AHCY,ATP1A1,ATP5F1C,ATP5PO,CCT5,CD9,CDC42,CNN3,CTSZ,CYCS,DBI,FABP3,FCER1G,FKBP4,FUBP1,GNB1,GSK3A,HNRNPD,HNRNPH1,HSPD1,HSPE1,ILK,KHSRP,LASP1,LTB4R,MAPRE2,MIF,NAP1L4,NUDC,P4HB,PABPC1,PCYT1A,PDIA6,PLIN3,PPIA,PRKAR2B,PSMD2,RAB8A,RBM3,RPL7,SH3KBP1,STK4,SYTL1,TAGLN2,TMOD3,TUBB1,UQCRC1,USO1,VWF	50 (26)	23				RHOA
PSEN2	peptidase		2			1.769	8.52e-13	0.0007	AKT1,CTNNB1,EGFR,ERK1/2,PSEN2,TP53	ACTB,AHCY,APOE,ATP1A1,ATP5F1C,ATP5PO,B2M,CCT5,CD9,CNN3,CTSZ,DBI,DHRS7,FABP5,FKBP4,FUBP1,GNB1,GSK3A,HNRNPA2B1,HNRNPD,HNRNPH1,HNRNPM,HSP90B1,HSPD1,HSPE1,ILK,ITGA2B,LASP1,LTB4R,MAPRE2,MT-CO2,NAP1L4,NUDC,P4HB,PABPC1,PDIA6,PLIN3,PPIA,PSMD2,RAB8A,RBM3,RPL7,TAGLN2,UQCRC1,USO1,ZYX	46 (6)	6	APH1A,CSNK1D,GnRH analog	DNMT3B,N-acetyl-L-cysteine,pifithrin alpha		APP,F2R	cholesterol,EGFR,GPX5,Immunoglobulin,PSEN1
chloride	chemical - endogenous mammalian		3	Activated		2.405	8.95e-13	0.0005	26s Proteasome,5-hydroxytryptamine,ACACA,ACE2,ANGPT2,Ap1,Cdc42,chloride,CHUK,Creb,CREB1,CTNNB1,EGFR,F5,GPX4,IGF1,IKBKB,INSR,ITGB2,JAK2,MAPK1,mitomycin C,MMP3,NEU2,NFKBIA,PLG,RELA,RET,SCNN1A,SLC6A4,Smad2/3,SOD1,STAT6,SYK,TGFB1,XDH	ATP5PO,CBFB,CCT5,CDC42,CNN3,CORO1C,CTSZ,CYCS,EIF4H,ERP29,ERP44,FUBP1,HINT1,HNRNPA2B1,HNRNPC,HNRNPD,HNRNPH1,HNRNPH3,HSP90B1,HSPA5,HSPE1,MIF,MMRN1,MPDU1,MYL12A,NUDC,NUDT21,P4HB,PABPC1,PDE4D,PDIA6,PEBP1,PLEK,PLIN3,PPIA,PRKAR2B,PSMD2,PSMD6,RAB8A,RBM3,RBMX,RCSD1,SEC23A,SET,SH3KBP1,SRI,STK4,SYNCRIP,SYTL1,TAGLN2,TES,TMOD3,UBE2I,UQCRC1,USO1,ZYX	56 (36)	28	bisphenol A,TSH	CLDN7,GABA
APC-CDC20	complex		3			-0.729	8.96e-13	0.0011	ANAPC7,APC (complex),APC-CDC20,BCL2L1,CDC20,CDK2,CDKN1A,Cyclin A,E2F1,FGF2,GMNN,HSF2,NFkB (complex),PTTG1,RASSF1,RB1,TP53	ACTB,AHCY,ATP1A1,ATP5F1C,B2M,CBFB,CCT3,CCT5,CD9,CNN3,COX6B1,CYCS,DBI,EIF3I,FABP5,FKBP4,FUBP1,GSK3A,GSTO1,HSP90B1,HSPA5,HSPD1,HSPE1,ILK,ITGA2B,LASP1,LTB4R,MAPRE2,MIF,MT-CO2,NAP1L4,NUDC,NUDT21,P4HB,PCYT1A,PDIA6,PSMD2,PXN,RAB8A,RBM3,RELA,RPL7,SLC16A3,TAGLN2,TUBB1,USO1,ZYX	47 (17)	13		FBXO5			PTTG1
NEK4	kinase		3			-1.86	9.13e-13	0.0215	Akt,AKT1,BHLHE40,BIRC5,CCND1,CDKN1A,CEBPA,CTNNB1,E2F1,EIF2AK3,EIF4E,EP300,ERBB2,ERK1/2,GLI1,H2AX,HIF1A,HNF4A,IGF1R,IL6,JUN,KAT2B,MAPK1,MTOR,NANOG,NEK4,NFKB1,NFKBIA,PARP1,PPARG,RB1,RELA,SP1,STAT3,TP53,TP73,TSC2	ACOT1,AHCY,ALDOC,APOE,ATP1A1,ATP5F1C,AVIL,B2M,CD9,CDC42,CNN3,COX6B1,DBI,DPP7,EIF3I,ERP29,FABP3,FABP5,FKBP4,FUBP1,GSK3A,GSTO1,HINT1,HNRNPA2B1,HNRNPH1,HNRNPM,HSPA5,HSPD1,HSPE1,ILK,ITGA2B,KHSRP,LASP1,LTB4R,MAPRE2,MMRN1,MPDU1,MPPE1,MT-CO2,NAP1L4,NAPA,NUCKS1,NUDC,P4HB,PDIA6,PGP,PLEK,PLIN3,PPIA,PPIB,PSMA2,PSMD2,RAB8A,RAB8B,RBM3,RELA,RNASEL,RPL7,SET,SH3KBP1,SRI,STK4,SYNE2,SYTL1,TAGLN2,TES,THBS1,TMOD3,TU…	74 (37)	35				TP53
MELK	kinase		3			-1.756	9.37e-13	0.0159	AKT1,BCL2L14,BHLHE40,BIRC5,BRCA1,CCND1,CDKN1A,CEBPA,CTNNB1,E2F1,EIF2AK3,EIF4E,EP300,ERBB2,ERK1/2,EZH2,GLI1,HIF1A,HNF4A,IGF1R,IL6,JUN,KAT2B,MAPK1,MELK,MTOR,NANOG,NFKB1,NFKBIA,PPARG,RB1,RELA,SP1,TP53,TP73,TSC2	ACOT1,AHCY,ALDOC,APOE,ATP1A1,ATP5F1C,AVIL,B2M,CDC42,CNN3,COX6B1,DBI,DPP7,EIF3I,ERP29,FABP3,FABP5,FKBP4,FUBP1,GSK3A,GSTO1,HINT1,HNRNPA2B1,HNRNPD,HNRNPH1,HNRNPM,HSPA5,HSPD1,HSPE1,ILK,ITGA2B,KHSRP,LASP1,LTB4R,MAPRE2,MMRN1,MPDU1,MT-CO2,NAP1L4,NAPA,NUCKS1,NUDC,P4HB,PDIA6,PGP,PLEK,PLIN3,PPIA,PPIB,PSMA2,PSMD2,RAB8A,RAB8B,RBM3,RELA,RNASEL,RPL7,S100A9,SET,SH3KBP1,SRI,STK4,SYNE2,SYTL1,TAGLN2,TES,THBS1,TUBB…	73 (36)	34	COPS5,RABL6
RPS14	translation regulator		3			0.236	9.44e-13	0.0058	AR,ATF4,CCND1,CDK4/6,CREB1,CTNNB1,E2F1,F2,GCK,GLI1,HIF1A,HIPK2,KAT5,MDM2,MYC,MYCN,NFKBIA,NR3C1,Pka,PTEN,RARA,RELA,RPS14,RUNX3,SMAD3,SMAD4,SP1,STAT3,TP53,TP63,TP73	ACTB,AHCY,ALDOC,ATP5F1C,ATP6AP1,AVIL,CBFB,CCT3,CD9,CORO1C,COX6B1,CTSZ,CYCS,DBI,EIF3I,ERP29,FABP5,FCER1G,FUBP1,GLRX5,GSK3A,HINT1,HNRNPA2B1,HNRNPD,HNRNPH1,HSPD1,HSPE1,ILK,KHSRP,LASP1,MAPRE2,MIF,MPDU1,MYL12A,NAP1L4,NAPA,NUCKS1,NUDC,NUDT21,OLR1,PDE4D,PGLS,PLIN3,PPIA,PRKAR2B,PSMD2,PSMD6,PXN,RAB43,RAB8A,RAB8B,RBM3,RBMX,RELA,RNASEL,RPL7,SAMD9,SEC23A,SH3KBP1,SLC16A3,STK4,SYNCRIP,SYNE2,SYTL1,TAGLN2,TES,TU…	72 (31)	30	CD28,CD3,D-glucose,HSP90B1,ING1,Insulin,MLXIPL			TP53
cilengitide	biologic drug		3	Activated		2.433	9.55e-13	0.0038	AHR,Akt,AKT1,CASP8,cilengitide,COL18A1,EGFR,IGF1R,ITGAV,ITGB3,ITGB5,MAPK1,MTOR,NFkB (complex),P38 MAPK,PI3K (complex),REL,SMAD3,STAT6,SYK,Tgf beta,TGFB1,TP53	AHCY,ATP1A1,ATP5F1C,ATP5PO,AVIL,CBFB,CCT5,CDC42,CNN3,CORO1C,DBI,DNAJB1,EIF4H,ERP29,FKBP2,FKBP4,FUBP1,GSK3A,HINT1,HNRNPA2B1,HNRNPC,HNRNPD,HNRNPH1,HNRNPH3,HNRNPM,HSPD1,HSPE1,ILK,LASP1,LTB4R,MAPRE2,MIF,MINPP1,MMP25,MPPE1,MYL12A,NAP1L4,NUDC,OLR1,P4HB,PABPC1,PDE4D,PGP,PPIA,PPIB,PSMD2,PXN,RAB8A,RBM3,RCSD1,RPL7,S100A9,SRI,TAGLN2,TES,TMOD3,UBE2I,USO1,VWF,WIPF1,ZYX	61 (23)	20					ITGAV
PRL	cytokine		2	Inhibited		-3.153	9.55e-13	0.0062	AKT1,AR,BRCA1,Creb,EGFR,ERBB2,ESR1,IGF1,IGF1R,JAK2,MAPK1,MAPK7,MAPK8,MAPK9,NFkB (complex),NFKBIA,PI3K (complex),PRKCA,PRL,RB1,RELA,SP1,STAT3,STAT5a/b,STAT5B,TP53,ZAP70	ACOT1,ACTB,AHCY,ALDOC,ATP5PO,ATP6AP1,B2M,CCT3,CCT5,CD55,CD9,CNN3,COX6B1,CTSZ,CYCS,DBI,DSC1,ERP29,FABP5,FUBP1,GNB1,GSK3A,HINT1,HNRNPA2B1,HNRNPD,HNRNPH1,HNRNPM,HSPD1,HSPE1,ILK,LASP1,MAPRE2,MIF,MMRN1,MPDU1,NAP1L4,NUDC,P4HB,PABPC1,PCYT1A,PDIA6,PEBP1,PGLS,PLEK,PLIN3,PPIA,PRKAR2B,PSMD2,PXN,RAB5B,RAB8A,RBM3,RPL7,S100A9,SAMD9,SEC23A,SET,SH3KBP1,SLC44A2,STK4,SYTL1,TAGLN2,TMOD3,TUBB1,UBE2I,USO1,VPS4B,ZYX	68 (27)	27	5-hydroxytryptamine,8-chlorophenylthio-adenosine 3',5'-cyclic monophosphate,ADCYAP1,bisphenol A,ETS,GABA,KAT5,PHF6,PRKACB,TRH,VIP,WT1	1-((2-chlorophenyl)diphenylmethyl)-1H-pyrazole,actinomycin D,AHR,curcumin,EDN1,levodopa,temozolomide		APP,CBL,CCNB1,cholesterol,Cyclin B,DCN,ECM1,EGFR,ERBB4,FN1,FSH,FYN,ID1,KRT19,NFKB1,OXT,pregnenolone,PRKCA,PTPN11,RPS6KB1,SPINK1,thymidine kinase	AKR1C3,BCL6,DNAJA4,TSC22D1,TXNIP
sapanisertib	chemical drug		3			0	9.75e-13	0.0025	Akt,AKT1,AKT3,Ap1,CRTC1,EIF4E,EIF4EBP1,MTOR,MTORC2,Pkc(s),RICTOR,RPS6,sapanisertib,STAT3,TP53	AHCY,APOE,ATP1A1,ATP5PO,ATP6AP1,AVIL,B2M,CD55,CD9,CNN3,COX6B1,CTSZ,CYCS,DBI,FCER1G,FKBP4,FUBP1,GSK3A,HNRNPC,HNRNPM,HSP90B1,HSPD1,HSPE1,ILK,ITGA2B,LASP1,LTB4R,MAPRE2,MPPE1,MT-CO2,NAP1L4,P4HB,PABPC1,PDIA6,PGP,PPIB,PRKAR2B,PSMA2,PSMC6,PSMD2,PSMD6,PXN,RAB8A,RBM3,SLC16A3,TAGLN2,UQCRC1,USO1,WIPF1,ZYX	50 (15)	13					CRTC1,MTORC2
mustard gas	chemical toxicant		3			-1.709	9.84e-13	0.0131	Akt,AKT1,BHLHE40,BIRC5,CASP3,CCND1,CDKN1A,CEBPA,CEBPB,Creb,CREB1,CTNNB1,DICER1,E2F1,EIF2AK3,EIF4E,EP300,ERBB2,ERK1/2,GLI1,HIF1A,HNF4A,IGF1R,IL6,JUN,KAT2B,MTOR,mustard gas,NANOG,NFKB1,NFKBIA,NR4A1,PARP1,PPARG,PTEN,RB1,RELA,Rsk,SP1,SRF,STAT3,TP53,TP73,TSC2	ACOT1,AHCY,ALDOC,APOE,ATP1A1,ATP5F1C,AVIL,B2M,CDC42,CNN3,COX6B1,DBI,DPP7,EIF3I,FABP3,FABP5,FKBP4,FUBP1,GSK3A,GSTO1,HINT1,HNRNPA2B1,HNRNPD,HNRNPH1,HNRNPM,HSPA5,HSPD1,HSPE1,ILK,ITGA2B,KHSRP,LASP1,LTB4R,MAPRE2,MMRN1,MPDU1,MPPE1,MT-CO2,NAP1L4,NAPA,NUCKS1,NUDC,NUDT21,P4HB,PDIA6,PGP,PLEK,PLIN3,PPIA,PPIB,PSMA2,PSMD2,RAB43,RAB8A,RAB8B,RBM3,RBMX,RELA,RNASEL,RPL7,SEC23A,SRI,STK4,SYNCRIP,SYNE2,SYTL1,TAGLN2,…	77 (44)	41				reactive oxygen species,TP53
NDRG1	kinase		2	Activated		2.94	1.11e-12	0.0017	Akt,AKT1,AR,CTNNB1,EGFR,EIF2AK3,GLI1,JUN,MTOR,NDRG1,RELA,TP53,YAP1	ACTB,AHCY,APOE,ATP1A1,ATP5F1C,ATP5PO,ATP6AP1,AVIL,B2M,CCT3,CCT5,COX6B1,CYCS,DBI,FABP5,FUBP1,GSK3A,HNRNPD,HNRNPH1,HNRNPM,HSPD1,HSPE1,HUWE1,ILK,ITGA2B,LASP1,LTB4R,MAPRE2,MMP25,MPPE1,NAP1L4,NAPA,NUDC,OLR1,P4HB,PABPC1,PDIA6,PGP,PLIN3,PPIA,PPIB,PRKAR2B,PSMD2,PXN,RAB8A,RAB8B,RBM3,RELA,RPL7,S100A9,SH3KBP1,SLC16A3,STK4,SYTL1,TAGLN2,WIPF1	56 (13)	13	BHLHE40,Co2+,HIF1A,IL4,IL5,metribolone,tributyrin,tunicamycin,vorinostat	ANPEP,apitolisib,ascorbic acid,GnRH analog,KLF3,uranyl nitrate,WT1		APOA5,cholesterol	EGFR,EIF2AK3,KLK3,MTOR,ZEB1
CHEK	group		3			1.86	1.2e-12	0.0224	Akt,AKT1,BHLHE40,BIRC5,BRCA1,CCND1,CDKN1A,CEBPA,CHEK,CHEK2,CTNNB1,E2F1,EIF2AK3,EIF4E,EP300,ERBB2,ERK1/2,GLI1,H2AX,HIF1A,HNF4A,IGF1R,IL6,JUN,KAT2B,MAPK1,MTOR,NANOG,NFKB1,NFKBIA,PARP1,PKM,PPARG,RB1,RELA,SP1,STAT3,TP53,TP73,TSC2	ACOT1,AHCY,ALDOC,APOE,ATP1A1,ATP5F1C,AVIL,B2M,CDC42,CNN3,COX6B1,DBI,DPP7,EIF3I,ERP29,FABP3,FABP5,FKBP4,FUBP1,GSK3A,GSTO1,HINT1,HNRNPA2B1,HNRNPD,HNRNPH1,HNRNPM,HSPA5,HSPD1,HSPE1,ILK,ITGA2B,KHSRP,LASP1,LTB4R,MAPRE2,MMRN1,MPDU1,MPPE1,MT-CO2,NAP1L4,NAPA,NUDC,P4HB,PDIA6,PGLS,PGP,PLEK,PLIN3,PPIA,PPIB,PSMA2,PSMD2,RAB8A,RAB8B,RBM3,RELA,RNASEL,RPL7,SET,SH3KBP1,SRI,STK4,SYNE2,SYTL1,TAGLN2,TES,THBS1,TMOD3,T…	74 (40)	37					CHEK1,TP53
BUB3	other	-2.184	3			-0.447	1.2e-12	0.0006	APC,BUB3,CDC20,CDKN1A,CTNNB1,Cyclin A,E2F1,MTOR,RASSF1,TP53	AHCY,ATP1A1,ATP5F1C,ATP5PO,AVIL,B2M,CD9,CNN3,DBI,EIF3I,FABP5,FKBP4,FUBP1,GSK3A,GSTO1,HSP90B1,HSPA5,HSPD1,HSPE1,ILK,ITGA2B,LASP1,LTB4R,MAPRE2,MT-CO2,NAP1L4,NUDC,P4HB,PCYT1A,PDIA6,PGP,PLIN3,PPIB,PRKAR2B,PSMD2,RAB8A,RBM3,RPL7,SLC16A3,TAGLN2,THBS1,TUBB1,UQCRC1,USO1,ZYX	45 (10)	8	ESR1,PKM	GnRH analog,NMS-873			CDC20,TP53
CB-5083	chemical drug		3	Activated		2.325	1.22e-12	0.0195	Akt,AKT1,BHLHE40,BIRC5,CB-5083,CCND1,CDKN1A,CEBPA,CTNNB1,E2F1,EIF2AK3,EIF4E,EP300,ERBB2,ERK1/2,GLI1,HIF1A,HNF4A,IGF1R,IL6,JUN,KAT2B,MTOR,MYC,NANOG,NFKB1,NFKBIA,PPARG,RB1,RELA,RNF5,SCAP,SP1,STAT3,TP53,TP73,TSC2,VCP	ACOT1,AHCY,ALDOC,APOE,ATP1A1,ATP5F1C,AVIL,B2M,CCT3,CD9,CDC42,CNN3,COX6B1,DBI,DPP7,EIF3I,FABP3,FABP5,FKBP4,FUBP1,GLRX5,GSK3A,GSTO1,HINT1,HNRNPA2B1,HNRNPD,HNRNPH1,HNRNPM,HSPA5,HSPD1,HSPE1,ILK,ITGA2B,KHSRP,LASP1,LTB4R,MAPRE2,MMRN1,MPDU1,MPPE1,MT-CO2,NAP1L4,NAPA,NUCKS1,NUDC,NUDT21,P4HB,PDIA6,PGP,PLEK,PLIN3,PPIB,PSMA2,PSMD2,RAB8A,RAB8B,RBM3,RELA,RNASEL,RPL7,SET,SH3KBP1,SRI,STK4,SYNE2,SYTL1,TAGLN2,THBS…	74 (38)	36					TP53,VCP
SKLB1028	chemical drug		3	Activated		2.092	1.41e-12	0.0029	ABL1,AGT,Akt,AKT1,APP,Cdc42,Creb,CREB1,CTNNB1,EGFR,ERBB2,ESR1,FAS,FLT3,FOS,GPX1,HIF1A,HRAS,IDH2,JAK2,JUN,KLF11,KRAS,MAPK1,MAPK8,MAPK9,MTOR,NFAT5,NFKBIA,P38 MAPK,PI3K (complex),PIK3R1,SIRT3,SKLB1028,SP1,SRC (family),STAT3,STAT5B,STAT6,TP53,TP63,TP73,WBP2,YAP1	ACOT1,ACTB,AHCY,ATP1A1,ATP5F1C,ATP5PO,CCT5,CD9,CDC42,CORO1C,CTSZ,CYCS,DBI,DSC1,ERP29,FABP3,FKBP4,GLRX,GSK3A,HINT1,HNRNPA2B1,HNRNPD,HNRNPH1,HNRNPH3,HNRNPM,HSP90B1,HSPA5,HSPE1,HUWE1,ILK,KHSRP,LASP1,MAPRE2,MIF,MMP25,MMRN1,MPDU1,MPPE1,MT-CO2,NAP1L4,NUCKS1,NUDC,PABPC1,PCYT1A,PDIA6,PEBP1,PGLS,PGP,PLIN3,PPIA,PPIB,PSMA2,PSMC6,PSMD2,RAB5B,RAB8A,RBM3,RBMX,RELA,RNASEL,RPL7,SAMD9,SEPTIN2,SET,SH3KBP1,SLC44A2,…	74 (44)	41					ABL1,EGFR
SFPQ	other	-1.149	3			0.97	1.43e-12	0.0058	AKT1,AR,BAX,CASP3,CCNE1,CDK2,Creb,CREB1,CREBBP,DICER1,EGFR,EP300,ERBB2,ESR1,HIF1A,IL18,MAPK1,MAPK7,NCOA2,NFkB (complex),Pka,PTEN,RELA,SFPQ,SMAD3,SRC (family),SREBF2,STAT3,STUB1,TOP1,TP53	ACOT1,ACTB,AHCY,ALDOC,ATP1A1,ATP5F1C,ATP5PO,ATP6AP1,B2M,CCT3,CCT5,CD9,CNN3,COX6B1,DBI,DNM3,DSC1,ERP29,FABP5,FKBP4,GNB1,GSTO1,HNRNPA2B1,HNRNPH1,HNRNPM,HSPA5,HSPD1,HSPE1,HUWE1,ILK,LASP1,MAPRE2,MIF,MT-CO2,NAP1L4,NUCKS1,NUDC,P4HB,PABPC1,PCYT1A,PDE4D,PDIA6,PGLS,PLIN3,PPIA,PRKAR2B,PSMD2,PXN,RAB43,RAB5B,RAB8A,RBM3,RBMX,RPL7,SAMD9,SEC23A,SET,SF1,SLC16A3,SLC44A2,SYNCRIP,SYTL1,THBS1,U2AF1/U2AF1L5,UQCRC1,US…	68 (31)	29	CSNK2A1,ESR1,FN1,IL4,IL5,PRKCA
TP53	transcription regulator		2			-1.756	1.44e-12	0.0229	Akt,AKT1,BHLHE40,BIRC5,CCND1,CDKN1A,CEBPA,CTNNB1,E2F1,EIF2AK3,EIF4E,EP300,ERBB2,ERK1/2,GLI1,HIF1A,HNF4A,IGF1R,IL6,JUN,KAT2B,MTOR,NANOG,NFKB1,NFKBIA,PPARG,RB1,RELA,SP1,STAT3,TP53,TP73,TSC2	ACOT1,AHCY,ALDOC,APOE,ATP1A1,ATP5F1C,AVIL,B2M,CD9,CDC42,CNN3,COX6B1,DBI,DPP7,EIF3I,FABP3,FABP5,FKBP4,FUBP1,GSK3A,GSTO1,HINT1,HNRNPA2B1,HNRNPH1,HNRNPM,HSPA5,HSPD1,HSPE1,ILK,ITGA2B,KHSRP,LASP1,LTB4R,MAPRE2,MMRN1,MPDU1,MPPE1,MT-CO2,NAP1L4,NAPA,NUCKS1,NUDC,P4HB,PDIA6,PGP,PLEK,PLIN3,PPIA,PPIB,PSMA2,PSMD2,RAB8A,RAB8B,RBM3,RELA,RNASEL,RPL7,SET,SH3KBP1,SRI,STK4,SYNE2,SYTL1,TAGLN2,TES,THBS1,TUBB1,UBE2I,UQ…	73 (33)	33	(diaminocyclohexane)(diacetato)(dichloro)platinum,3,3'-diindolylmethane,4-oxo-2-nonenal,5-fluorouracil,7-ketocholesterol,actinomycin D,ampelopsin,andrographolide,ANGPT2,anisomycin,arsenic trioxide,arsenite,ATM/ATR,ATR,BACH2,barasertib,BARD1,bortezomib,cadmium,calpain inhibitor 2,capsaicin,CCNE1,CD 437,CDK5RAP3,CEBPD,celecoxib,CELF2,chrysotile asbestos,clioquinol,cobalt,Cop9 Signalosome,CSNK2A2,CS…	(+)-catechin,1,2-dimethylhydrazine,ACKR3,APH1A,APH1B,apigenin,arsenic,ascorbic acid,AZD5438,BANP,BCL6,BCR-ABL1,bisindolylmaleimide iv,BUB3,caffeic acid,caffeine,CB-5083,CDC14A,CHAF1A,CHCHD4,CHEK,COPS5,CUL7,DDX5,dimethyl sulfoxide,DPTA-NONOate,E2F3,epicatechin gallate,eprenetapopt,ERBB4,FSH,GABA,geldanamycin,GMNN,GRK5,Hdac1/2,heparin,HUWE1,MDC1,metribolone,miR-30c-5p (and other miRNAs w/seed GUAAA…		ACAC,BHLHE40,CD247,COL7A1,CREB3,CRYAB,DNM1L,ECM1,EGFR,FAT1,FHL1,FYN,GBP1,glutathione peroxidase,mir-190,miR-199a-3p (and other miRNAs w/seed CAGUAGU),NFE2,PDIA6,PIK3C3,PRKG1,RPS19,SEC23B,SERPINE2,SGPL1,TFAM,TMSB10/TMSB4X	ACADS,APOA1,BLM,BUB1,COL4A2,DNAJA4,DNMT3B,Esrra,HK2,IL5,IPO9,ITGA2B,KLK3,LGR5,mir-1,miR-378a-3p (and other miRNAs w/seed CUGGACU),mir-515,OPA1,PINK1,PSMD1,PSMD3,SMAD7,Top2,WNT5B
RSPO3	kinase		3			0.263	1.51e-12	0.0025	26s Proteasome,Akt,AKT1,BAK1,EGFR,ERK,ERN1,HIF1A,HSF1,LGR4,MTOR,NR3C1,PPARGC1A,PRKAA,RELA,RSPO3,SOX2,SREBF1,STIM1,TBC1D1,TP53,TSC1,TSC2,YAP1	ACTB,AHCY,ALDOC,APOE,ATP1A1,ATP5F1C,ATP5PO,AVIL,CCT3,CCT5,CNN3,DNAJB1,DPP7,FCER1G,GLRX,GSK3A,GSTO1,HNRNPD,HNRNPH1,HNRNPM,HSPE1,HUWE1,ILK,ITGA2B,LASP1,LTB4R,MAPRE2,MIF,MMP25,MPPE1,NAP1L4,NUCKS1,NUDC,NUDT21,OLR1,PABPC1,PCYT1A,PDIA6,PGP,PLIN3,PPIB,PSMD6,PXN,RAB8A,RBM3,RELA,RPL7,S100A9,SEPTIN2,SH3KBP1,SLC16A3,STK4,SYTL1,TAGLN2,TBCB,UBE2I,USO1,WIPF1	58 (24)	22	Insulin			LGR4	cholesterol,SREBF2
FN1	enzyme	1.137	2	Inhibited		-3.349	1.51e-12	0.0047	Akt,AKT1,CASP8,CTNNB1,EGFR,FN1,HRAS,IGF1R,IKZF1,INSR,JAK2,MAPK1,MAPK8,MAPK9,MMP3,MTOR,NFkB (complex),NFKB1,P38 MAPK,PI3K (complex),PRKCA,RELA,SFPQ,Smad2/3,SRC (family),TGFB1,THRAP3,TLR4,TP53,UBA1,YAP1	ACTB,AHCY,APOE,ATP1A1,ATP5F1C,AVIL,CBFB,CCT5,CDC42,CNN3,CORO1C,DBI,DDX17,DNM3,EIF4H,ERP29,FABP5,FKBP2,FKBP4,FUBP1,GNB1,GSK3A,HNRNPC,HNRNPD,HNRNPH1,HNRNPM,HSPE1,KHSRP,LASP1,MAPRE2,MIF,MMP25,MPPE1,MYL12A,NAP1L4,NUDC,NUDT21,PABPC1,PDE4D,PDIA6,PGP,PLEK,PLIN3,PPIA,PPIB,PRKAR2B,PSMD2,PXN,RAB8A,RBM3,S100A9,SET,SF1,SH3KBP1,SLC16A3,SRI,STK4,SYNCRIP,SYTL1,TAGLN2,THBS1,TMOD3,U2AF1/U2AF1L5,UBE2I,USO1	65 (31)	31	aldosterone,ANGPT2,arsenic trioxide,cholesterol,cyclosporin A,D-glucose,ECM1,EDN1,ERN1,F2,F2R,heparin,HIF1A,ID1,IgG,IL4,Insulin,JUN,LCN2,LGALS1,methylprednisolone,mycophenolic acid,PDGF (family),PRL,SREBF1,TSC22D1,tunicamycin,WNT5B,ZEB1	actinomycin D,AHR,andrographolide,CIITA,dasatinib,dimethyl fumarate,FSH,GABA,hyaluronidase,Immunoglobulin,mir-1,miR-199a-3p (and other miRNAs w/seed CAGUAGU),mir-34,miR-9-5p (and other miRNAs w/seed CUUUGGU),NEUROG1,PRKG1,rosiglitazone,silibinin,SMAD7,STK11,thapsigargin,XBP1,ZNF148		BIRC5,EGFR,FYN,MTOR,PTPN11,SDCBP,SFPQ,SKP2	CCNE1,CD8A,CRMP1,Cyclin A,DYRK2,HIPK1,PLA2G4A,RNF125,TCR,Top2,UBA1,UBR5
AURK	group		3			-0.927	1.54e-12	0.0017	AKT1,AURK,AURKA,AURKB,BIRC5,BRCA1,CDK4/6,ESR1,Histone h3,MTOR,MYC,NFKBIA,PKM,RUVBL1,SDCBP,SRC (family),STMN1,TP53,WWC1,YAP1	ACTB,ATP1A1,ATP5F1C,AVIL,CCT3,CDC42,CNN3,COX6B1,CTSZ,DBI,DSC1,FKBP4,FUBP1,GLRX5,GNB1,GSK3A,HNRNPA2B1,HNRNPD,HNRNPH1,HNRNPM,HSPE1,ILK,ITGA2B,LASP1,LTB4R,MAPRE2,MIF,MMP25,MPDU1,MT-CO2,NAP1L4,NUCKS1,OLR1,P4HB,PCYT1A,PDIA6,PEBP1,PGLS,PGP,PPIA,PPIB,PRKAR2B,PSMD2,RAB5B,RAB8A,RBM3,RPL7,SAMD9,SLC44A2,STK4,TES,TMOD3,UBE2I,UQCRC1,USO1,VWF,ZYX	57 (20)	14		KW 2449,vorinostat
NSC 644221	chemical reagent		3			-0.13	1.57e-12	0.0053	Akt,CDK2,CDKN1A,EIF4EBP1,H2AX,HIF1A,IL1B,JUN,MAPK1,NFKB1,Nos,NSC 644221,PARP1,PPARG,PTEN,RELA,Smad2/3,STAT3,TP53,VEGFA	AHCY,ALDOC,APOE,ATP1A1,ATP5F1C,ATP5PO,CBFB,CD55,CNN3,COX6B1,CYCS,ERP29,FABP3,FCER1G,FKBP4,FUBP1,GSK3A,GSTO1,HSPA5,HSPD1,HUWE1,ILK,ITGA2B,KHSRP,LASP1,LTB4R,MAPRE2,MIF,MPPE1,NAP1L4,NUCKS1,OLR1,P4HB,PCYT1A,PDIA6,PPIA,PRKAR2B,PSMD2,PXN,RAB43,RAB8A,RBM3,RELA,RPL7,S100A9,SEC23A,SET,SH3KBP1,SLC16A3,STK4,SYNCRIP,SYTL1,THBS1,TMOD3,UBE2I,UQCRC1,USO1,WIPF1,ZYX	59 (20)	18					HIF1A
ADGRG3	G-protein coupled receptor	-1.786	3			1.604	1.72e-12	0.0029	ADGRG3,AKT1,CASP8,COL18A1,Creb,CTNNB1,EGFR,HIF1A,IGF1R,IRS2,ITGB1,MAPK1,MTOR,NFkB (complex),PAK4,PI3K (complex),PI3K (family),PIK3R1,PLAU,PLCG2,RELA,STAT3,STAT5a/b,SYK,TP53,YAP1	ACTB,AHCY,ALDOC,ATP1A1,ATP5F1C,AVIL,CCT5,CD9,CDC42,CNN3,CYCS,DBI,ERP29,FABP5,FKBP4,FUBP1,GSK3A,HNRNPA2B1,HNRNPD,HNRNPH1,HNRNPM,HSPE1,HUWE1,ILK,LASP1,LTB4R,MAPRE2,MMP25,NAP1L4,NUCKS1,NUDC,P4HB,PABPC1,PDIA6,PGP,PLIN3,PPIA,PPIB,PSMD2,PXN,RAB8A,RBM3,RCSD1,RPL7,S100A9,SH3KBP1,SLC16A3,STK4,SYTL1,TAGLN2,THBS1,TUBB1,UBE2I,USO1,VWF,ZYX	56 (26)	25				RHOA
Stat3-Stat3	complex		3			0	1.74e-12	0.0097	Akt,AKT1,ATF4,CCND1,CDKN1A,CEBPA,CREB1,EIF2AK3,F2,FOS,GCK,mir-21,MYC,NANOG,NFE2L2,NRF1,PARP1,PI3K (complex),PIM1,Pka,PKM,PPARG,PTEN,ROCK2,SP1,STAT3,Stat3-Stat3,STAT6,TP53,TP63,TP73,TSC1,TSC2,WT1	ACTB,AHCY,APRT,ATP5F1C,CCT3,CD9,CDC42,CORO1C,COX6B1,CYCS,DBI,DPP7,DSC1,ERP29,FABP3,FABP5,FCER1G,GLRX,GLRX5,GSK3A,GSTO1,HINT1,HNRNPA2B1,HNRNPD,HNRNPH3,HNRNPM,HSPA5,HSPD1,HSPE1,KHSRP,LASP1,MAPRE2,MIF,MMRN1,MPPE1,MT-CO2,NAP1L4,NAPA,NUDT21,OLR1,PCYT1A,PDE4D,PGLS,PPIA,PPIB,PRKAR2B,PSMA2,PSMC6,PSMD2,PSMD6,RAB43,RAB8A,RBM3,RBMX,RELA,RPL7,SEC23A,SEPTIN2,SET,SLC16A3,SYNCRIP,SYNE2,TAGLN2,TES,TMOD3,TUBB1,UB…	70 (34)	32				HIF1A,IL13,RORC,SPINK1
HSPBP1	other		3	Inhibited		-2.018	1.81e-12	0.0016	26s Proteasome,AGT,Akt,AKT1,APP,BAX,CCND1,CD24,CD40,CDKN1A,Creb,CREB1,CSF1,CTNNB1,EGFR,ERBB2,FOS,HIF1A,HRAS,HSF1,Hsp70,HSPA1A/HSPA1B,HSPA9,HSPBP1,JAK2,JUN,KLF11,KRAS,LIN28A,MAP2K3,MAPK3,MED1,NFE2L2,PARP1,PKM,SP1,SRC (family),SREBF1,SREBF2,STAT3,STAT5a/b,STAT5B,STAT6,STUB1,TLR4,TP53,TWIST1,WBP2,XBP1,YAP1	ACOT1,ACTB,AHCY,ATP1A1,ATP5F1C,ATP5PO,CCT5,CD9,CNN3,CORO1C,COX6B1,CYCS,DBI,DNAJB1,DNM3,ERP44,FABP3,FKBP2,FUBP1,GNB1,GSK3A,GSTO1,HINT1,HNRNPA2B1,HNRNPD,HNRNPH1,HNRNPH3,HNRNPM,HSP90B1,HSPA5,HSPE1,HUWE1,ILK,MAPRE2,MMP25,MMRN1,MPPE1,MT-CO2,NAP1L4,NUCKS1,NUDC,PABPC1,PDIA6,PGLS,PLEK,PLIN3,PPIA,PPIB,PSMA2,PSMC6,PSMD6,RAB5B,RAB8A,RBM3,RBMX,RELA,RNASEL,RPL7,SEC23A,SEPTIN2,SET,SH3KBP1,STK4,SYNE2,TAGLN2,TES…	71 (50)	46				EGFR
cardiolipin	chemical - endogenous mammalian		3			0	1.98e-12	0.003	AGK,AKT1,cardiolipin,Cdc42,Cpla2,CREB1,EGFR,ERK1/2,GBA,HIF1A,JAK2,MTOR,NFkB (complex),NFKB1,NLRP3,P38 MAPK,PLA2G6,PPARG,RELA,RHOA,RICTOR,RPS6KB1,Smad2/3,SMAD3,STAT3,TP53	ACTB,AHCY,ALDOC,ATP1A1,ATP5PO,ATP6AP1,AVIL,B2M,CBFB,CCT5,CD55,CD9,CNN3,COX6B1,CTSZ,CYCS,DBI,FABP3,FKBP4,FUBP1,GSK3A,HNRNPA2B1,HNRNPD,HNRNPH1,HNRNPM,HSPD1,HSPE1,HUWE1,KHSRP,LTB4R,MAPRE2,NAP1L4,NUCKS1,NUDC,OLR1,P4HB,PABPC1,PDIA6,PGP,PPIB,PSMA2,PSMC6,PSMD2,PSMD6,RAB8A,RBM3,RBMX,RELA,SET,SH3KBP1,SLC16A3,STK4,UQCRC1,USO1,WIPF1,ZYX	56 (26)	20	linoleic acid	reactive oxygen species		RPS6KB1
BIRC5	other		2			-1.414	2.69e-12	0.003	BAX,BIRC5,CASP8,caspase,CDK2,EP300,MYC,RB1,SP1,TP53,VEGFA	AHCY,APOE,ATP1A1,ATP5F1C,ATP5PO,B2M,CBFB,CCT3,CD55,CNN3,CYCS,FKBP4,FUBP1,GLRX5,GSK3A,HINT1,HNRNPA2B1,HNRNPD,HNRNPH1,HSPA5,HSPD1,HSPE1,ILK,ITGA2B,LASP1,LTB4R,MAPRE2,MIF,MT-CO2,NAP1L4,NUDT21,OLR1,P4HB,PCYT1A,PDIA6,PPIA,PSMD2,RAB8A,RBM3,S100A9,SET,SLC16A3,TAGLN2,TES,THBS1,TUBB1,UBE2I,USO1,VWF,ZYX	50 (11)	11	1,2-dimethylhydrazine,actinomycin D,AURKA,BCR-ABL1,CCNB1,CD3,CHEK2,CUL7,Cyclin B,E2F3,EGFR,ESR1,FLT1,FN1,geldanamycin,HIF1A,ID1,Immunoglobulin,Insulin,JUN,MTOR,NQO1,PI3K (family),PLK1,SP4,SREBF2,Z-LLL-CHO	2,5-dimethylcelecoxib,3,3'-diindolylmethane,5-fluorouracil,8-chlorophenylthio-adenosine 3',5'-cyclic monophosphate,andrographolide,bortezomib,CEBPD,celecoxib,COPS5,curcumin,dimethyl sulfoxide,docetaxel,FBXL7,fisetin,IgG,LATS,mir-34,morin,RICTOR,salinosporamide A,sepantronium,silibinin,tanespimycin,TNFSF10,vorinostat		IL13,IL5,PTTG1	VWF
manganese chloride	chemical reagent		3			-1.408	2.75e-12	0.001	ADCY,AHR,CASP3,Cdc42,CDK2,Creb,CTNNB1,cyclic AMP,DICER1,EGFR,GAST,GUCY,HIF1A,HRAS,IL18,Integrin,ITGA2B,ITGB1,ITGB3,LIPE,manganese chloride,MAPK1,PARP1,PI3K (complex),Pka,PPARGC1A,PTEN,REL,RELA,SOD2,STAT6,STK11,SYK,TGFB1,TP53,TRPM8,YAP1,ZAP70	ATP1A1,ATP5F1C,CBFB,CCT5,CNN3,CORO1C,COX6B1,CTSZ,DBI,DNAJB1,EIF4H,ERP29,FABP3,FKBP2,FKBP4,GNB1,HINT1,HNRNPC,HNRNPD,HNRNPH1,HNRNPH3,HSPE1,HUWE1,ILK,ITGA2B,LASP1,LTB4R,MAPRE2,MINPP1,MMP25,MYL12A,NAP1L4,NUCKS1,NUDC,PABPC1,PCYT1A,PDE4D,PLIN3,PPIA,PSMD2,RAB43,RAB8A,RBM3,RCSD1,RELA,RPL7,SEC23A,SET,SH3KBP1,SRI,STK4,SYNCRIP,SYTL1,TAGLN2,TES,THBS1,TMOD3,UBE2I,USO1,VPS4B,ZYX	61 (38)	33				Integrin,ITGA2B,MTOR	cholesterol,D-glucose,YY1
NABP1	other		3			-1.786	2.75e-12	0.002	Akt,BIRC5,BRCA1,CDK2,CDKN1A,CHEK1,CHEK2,cytarabine,E2F1,E2F3,EGFR,MDM4,MTOR,NABP1,NBN,NFkB (complex),P38 MAPK,PI3K (complex),PKM,RASSF1,RB1,RELA,STAT3,TP53	AHCY,APOE,ATP5F1C,AVIL,CCT5,CD55,CNN3,COX6B1,CYCS,DBI,EIF3I,FABP5,FCER1G,FKBP4,FUBP1,GSK3A,GSTO1,HNRNPA2B1,HNRNPD,HNRNPH1,HSPD1,ITGA2B,LASP1,LTB4R,MAPRE2,MIF,MPPE1,NAP1L4,NUCKS1,P4HB,PABPC1,PCYT1A,PDIA6,PGLS,PGP,PPIA,PPIB,PRKAR2B,PXN,RAB8A,RBM3,RPL7,SH3KBP1,SLC16A3,STK4,SYTL1,TAGLN2,TUBB1,UQCRC1,USO1,VWF,WIPF1,ZYX	53 (24)	20	IL4,IL5			CHEK1,CHEK2
FBXO5	enzyme		3			0.603	2.88e-12	0.0007	APC (complex),APC-CDC20,BCL2L1,CDC20,CDKN1A,Cyclin A,E2F1,FBXO5,FMR1,FZR1,GMNN,HSF2,Jnk,JUN,PTTG1,RASSF1,TP53	AHCY,ATP1A1,ATP5F1C,CCT3,CCT5,CD9,CNN3,CYCS,DBI,EIF3I,FABP5,FKBP4,FUBP1,GSK3A,GSTO1,HNRNPA2B1,HSP90B1,HSPA5,HSPD1,HSPE1,ILK,ITGA2B,LASP1,LTB4R,MAPRE2,MIF,MT-CO2,NAP1L4,NUDC,NUDT21,P4HB,PCYT1A,PDIA6,PPIA,PSMD2,RAB8A,RBM3,RELA,RPL7,TAGLN2,TUBB1,UQCRC1,USO1,ZYX	44 (17)	12	COPS5,E2F3	PLK1		Cyclin A	APC-CDC20,CDC20
Integrin	complex		2	Inhibited		-3.266	2.95e-12	0.0044	AHR,Akt,AKT1,Cdc42,Creb,CTNNB1,EGFR,ERK,ERK1/2,FN1,HRAS,IGF1R,Integrin,ITGA5,ITGA6,ITGB3,JUN,MAP2K1,MAPK1,P38 MAPK,p85 (pik3r),PI3K (complex),RHOA,SRC (family),SYK,TGFB1,VAV1,ZAP70	ACTB,AHCY,ATP1A1,B2M,CBFB,CCT5,CDC42,CNN3,CORO1C,CTSZ,CYCS,DNAJB1,EIF4H,ERP29,FABP5,FKBP2,FUBP1,GNB1,GSK3A,HINT1,HNRNPC,HNRNPD,HNRNPH1,HNRNPM,HSP90B1,HSPD1,HSPE1,ILK,ITGA2B,LASP1,MIF,MMP25,MPPE1,MT-CO2,MYL12A,NUDC,P4HB,PABPC1,PCYT1A,PDE4D,PLIN3,PPIA,PRKAR2B,PXN,RBM3,RCSD1,RELA,SRI,TMOD3,UBE2I,USO1,VPS4B,WIPF1,ZYX	54 (28)	27	CCN2,manganese chloride			ABL1,AHR,EGFR,JUN,reactive oxygen species,RPS6KB1
FYN	kinase		2	Inhibited		-3.101	3.11e-12	0.0067	Akt,AKT1,Alpha catenin,CD247,CD28,CTNNB1,EGFR,ERK,ERN1,FYN,GAB2,HRAS,IKBKB,IRF3,JAK2,KIT,MAP2,Map3k7,NFE2L2,NFkB (complex),P38 MAPK,PAK2,PI3K (complex),PIK3R1,Pkc(s),PLCG1,PLCG2,RHOA,SNCA,STAT3,SYK,ZAP70,ZNF106	ACTB,ALDOC,APOE,ATP1A1,ATP5F1C,ATP5PO,CCT3,CCT5,CD55,CD9,CTSZ,FABP5,FKBP2,GLRX,GNB1,GSTO1,HINT1,HNRNPD,HNRNPH1,HNRNPM,HSP90B1,HSPD1,HSPE1,HUWE1,ILK,ITGA2B,LASP1,MIF,MMRN1,MPPE1,NUDC,OLR1,P4HB,PABPC1,PCYT1A,PDE4D,PDIA6,PLIN3,PPIA,PPIB,PRKAR2B,PXN,RBM3,RCSD1,S100A9,SEC23A,SET,SLC16A3,STK4,TBCB,TUBB1,UQCRC1,USO1,VPS4B,ZYX	55 (33)	32	5-azacytidine,ANGPT2,APP,BCR-ABL1,CD3,EDN1,ERG,F2,FN1,HIF1A,IL5,ITGAV,NCR2,PRL,TCR,TP53	curcumin,dasatinib,geldanamycin,N-acetyl-L-cysteine,plicamycin,PTPN11,tauroursodeoxycholic acid		ABL1,Arp2/3,BTK,CD247,CD28,ERN1,IL4,MAP2,PLCG1,reactive oxygen species,RHOA,RORC	CBLB
C8orf44-SGK3/SGK3	kinase		3	Inhibited		-2.25	3.16e-12	0.0086	AKT1,AR,BAD,BAX,C8orf44-SGK3/SGK3,CASP8,CDKN1A,CSF2,CXCL12,EIF4EBP1,ESR1,FLII,FOXO3,HIF1A,L-threonine,MAPK1,MMP14,MTOR,NEDD4L,NFkB (complex),P38 MAPK,PRMT5,RAF1,RB1,RELA,RHOA,RICTOR,SMAD3,SREBF1,SYK,TGFB1	ACTB,ALDOC,APOE,ATP5F1C,ATP5PO,AVIL,CBFB,CCT3,CCT5,CD55,CDC42,CORO1C,COX6B1,CYCS,DBI,DSC1,EIF4H,ERP29,FABP3,FABP5,FKBP2,FKBP4,FUBP1,GNB1,GSTO1,HINT1,HNRNPA2B1,HNRNPC,HNRNPH1,HNRNPM,HSPD1,HUWE1,ILK,LTB4R,MIF,MYL12A,NUCKS1,PDE4D,PDIA6,PGLS,PGP,PPIB,PSMA2,PSMC6,PSMD2,PSMD6,RAB5B,RBM3,RCSD1,RELA,RPL7,S100A9,SAMD9,SEPTIN7,SF1,SH3KBP1,SLC44A2,SRI,STK4,SYTL1,TMOD3,UQCRC1,USO1,ZYX	64 (31)	25	PIK3C3			ESR1,L-threonine
TRIM28	transcription regulator		2			1.286	3.24e-12	0.0021	E2F1,E2F3,MYC,STAT3,TP53,TRIM28	ACTB,APOE,ATP1A1,ATP5F1C,CCT3,CNN3,COX6B1,CYCS,DBI,EIF3I,FABP5,FCER1G,FKBP4,FUBP1,GLRX5,GSK3A,HNRNPA2B1,HNRNPD,HNRNPH1,HSP90B1,HSPA5,HSPE1,ILK,ITGA2B,LASP1,LTB4R,MAPRE2,MIF,MT-CO2,NAP1L4,NUCKS1,NUDC,NUDT21,OLR1,P4HB,PDIA6,PPIA,PSMD2,RAB8A,RBM3,RELA,RPL7,SLC16A3,TES,UBE2I,UQCRC1,USO1,WIPF1,ZYX	49 (6)	5	CHEK2,MDC1	caffeine,DPTA-NONOate		CXCR4,TFDP1	E2F3,NFKB1
E2F4-Smad2/3-Smad4	complex		3			-0.239	3.74e-12	0.0049	Akt,AKT1,AR,ATF4,BAK1,BAX,CCN2,CCND1,CDK4/6,CDKN1A,CREB1,E2F4-Smad2/3-Smad4,EGFR,ERK,ERN1,F2,GLI1,HNF4A,MTOR,MYC,NOTCH1,PPARGC1A,PTEN,RELA,SMAD2,Smad2/3,Smad2/3-Smad4,SMAD3,SMAD4,SP1,STK11,TGFB1,TGM2,TP73,YAP1	ACOT1,ACTB,AHCY,ATP1B3,ATP6AP1,AVIL,CBFB,CCT3,CCT5,CDC42,COX6B1,CYCS,DBI,EIF4H,ERP29,FABP3,FABP5,FKBP2,FKBP4,FUBP1,GLRX5,GSTO1,HNRNPA2B1,HNRNPC,HNRNPD,HNRNPH1,HNRNPM,HSPD1,HSPE1,HUWE1,ILK,ITGA2B,LASP1,LTB4R,MAPRE2,MIF,MMP25,MPPE1,MYL12A,NAPA,NUDC,NUDT21,OLR1,PABPC1,PDIA6,PGP,PPIA,PPIB,PRKAR2B,RAB43,RAB8B,RBM3,RBMX,RNASEL,RPL7,SEC23A,SH3KBP1,SLC16A3,SRI,STK4,SYNCRIP,SYNE2,SYTL1,TAGLN2,TBCB,TES,TMO…	70 (35)	31
INSIG1	other		3			1.896	3.82e-12	0.0015	BAX,CHUK,EIF2AK3,ERK,HMGCR,HSPA5,INSIG1,IRF3,MTOR,MYC,P38 MAPK,PPARG,SREBF1,SREBF2,STAT3,YAP1	ACTB,AHCY,ALDOC,APOE,ATP5PO,AVIL,CCT3,CD55,CD9,COX6B1,CTSZ,CYCS,DBI,FABP3,FABP5,FCER1G,GLRX5,HNRNPA2B1,HNRNPD,HNRNPH1,HSP90B1,HSPA5,HSPD1,HSPE1,ITGA2B,MMP25,MT-CO2,NAPA,NUDT21,OLR1,P4HB,PCYT1A,PDIA6,PGP,PLIN3,PPIA,PPIB,PRKAR2B,RNASEL,RPL7,S100A9,STK4,TAGLN2,TES,UBE2I,USO1,WIPF1	47 (16)	15	CREB3,Insulin,methylprednisolone,MTORC1,rosiglitazone,Z36	APOA1,LGALS1,mir-122,pexidartinib		ERN1,JUN	CXCR4,LCN2,MLXIPL
TNS3	phosphatase		3			-0.544	3.95e-12	0.0016	AKT1,Cdc42,CHUK,COL18A1,ECT2,EGFR,HIF1A,HRAS,IGF1R,IRS2,ITGB1,MRTFA,MTOR,NFKB1,P38 MAPK,PI3K (complex),PIK3R1,PPARG,PRKCA,RELA,RHOA,ROCK2,SRF,STAT5a/b,SYK,TNS3,TP53,YAP1	ACTB,AHCY,ALDOC,ATP1A1,ATP5F1C,AVIL,CCT5,CD55,CDC42,CNN3,CTSZ,DBI,DSC1,FABP3,FKBP4,FUBP1,GNB1,GSK3A,HNRNPD,HNRNPH1,HNRNPM,HSPD1,HSPE1,HUWE1,ILK,KHSRP,LASP1,LTB4R,MAPRE2,MMP25,NAP1L4,NUCKS1,NUDC,P4HB,PABPC1,PCYT1A,PDIA6,PGP,PPIA,PPIB,PSMD2,RAB8A,RBM3,RCSD1,RPL7,SH3KBP1,STK4,SYTL1,TAGLN2,THBS1,TMOD3,TUBB1,USO1,VWF	54 (28)	27		mir-1			RHOA
RNF125	enzyme		3			-0.137	3.96e-12	0.0038	Akt,AKT1,BIRC5,CDK2,DDIT3,EGFR,HIF1A,HRAS,ID1,IFNB1,IRF3,JUN,KRAS,NANOG,PLAAT4,POU5F1,RB1,RNF125,TCF3,TFAP2A,TP53	AHCY,ATP1A1,ATP5F1C,ATP5PO,AVIL,CCT5,CNN3,COX6B1,CYCS,DBI,ERP29,FKBP4,FUBP1,GNB1,GSK3A,HNRNPD,HNRNPM,HSPD1,HSPE1,HUWE1,ILK,ITGA2B,LASP1,LTB4R,MAPRE2,MIF,MPPE1,MT-CO2,NAP1L4,NUCKS1,NUDC,NUDT21,P4HB,PABPC1,PCYT1A,PDIA6,PPIA,PRKAR2B,PSMC6,PSMD2,RAB8A,RBM3,RNASEL,S100A9,SET,STK4,TAGLN2,THBS1,TUBB1,UBE2I,USO1,VWF,ZYX	53 (21)	19		FLT1,FN1		ID1
TRAF4	other		2			-1.64	4.4e-12	0.001	Akt,EGFR,Jnk,MAP3K7,MAPK7,MAPK8,MAPK9,NFkB (complex),TP53,TRAF4	ACTB,AHCY,ALDOC,ATP1A1,ATP5F1C,CCT5,CNN3,DBI,FABP5,FKBP4,FUBP1,GSK3A,HNRNPA2B1,HNRNPD,HNRNPH1,HSP90B1,HSPA5,HSPD1,HSPE1,ILK,ITGA2B,LASP1,LTB4R,MAPRE2,MIF,MPPE1,MT-CO2,NAP1L4,NUDC,OLR1,P4HB,PABPC1,PDIA6,PPIA,PSMD2,PXN,RAB8A,RBM3,RNASEL,RPL7,SLC16A3,TAGLN2,UQCRC1,USO1,ZYX	45 (10)	9	5-fluorouracil,Immunoglobulin,vorinostat	bortezomib,COPS5		EGFR,IL13,IL5,reactive oxygen species
HIF3A	transcription regulator		3			0.485	4.41e-12	0.0188	Akt,AR,CDK2,CDKN1A,CEBPA,CHUK,EIF4EBP1,FOS,HIF1A,HIF3A,IL1B,mir-21,MYC,NFKB1,Nos,PKM,PPARG,PTEN,RELA,RHOA,Smad2/3,STAT3,STAT5a/b,TP53,TP63,VEGFA	ACTB,AHCY,ALDOC,APOE,ATP5F1C,ATP5PO,ATP6AP1,CBFB,CCT3,CD55,CD9,CDC42,CNN3,CTSZ,FABP3,FCER1G,FKBP4,GLRX,GLRX5,GSK3A,GSTO1,HNRNPD,HNRNPH1,HSPA5,HSPD1,HSPE1,HUWE1,ILK,ITGA2B,KHSRP,LTB4R,MAPRE2,MIF,MMRN1,MPPE1,MT-CO2,NAP1L4,NUCKS1,NUDT21,OLR1,PCYT1A,PDIA6,PGLS,PPIA,PRKAR2B,PSMA2,PSMD2,PXN,RAB43,RAB8A,RBM3,RELA,SEC23A,SEPTIN2,SH3KBP1,SLC16A3,STK4,SYNCRIP,SYTL1,TES,THBS1,TUBB1,UBE2I,UQCRC1,USO1,VWF,WIP…	68 (26)	25	Insulin	BACH1			EDN1
ZBP1	other		3			-0.508	4.46e-12	0.0042	AHR,Akt,ATF2,BAX,CASP3,CASP7,CASP8,CCND1,CEBPA,CSF2,cytokine,DICER1,HIF1A,HNF4A,IKBKB,IL18,IL6,IRF4,JUN,MAP3K7,MTOR,NFkB (complex),NFKB1,NFKBIA,NOS2,PARP1,PPARG,PTEN,REL,RELA,RIPK3,SP1,STAT1,STAT4,TP53,ZBP1	ACOT1,ACTB,APOE,ATP5F1C,ATP5PO,AVIL,CNN3,CYCS,DNAJB1,FABP3,FABP5,FCER1G,FKBP4,GLRX,GSK3A,HINT1,HNRNPA2B1,HNRNPH1,HSPD1,HUWE1,ILK,KHSRP,MAPRE2,MINPP1,MMP25,MMRN1,MPDU1,MPPE1,NAP1L4,NUCKS1,OLR1,PDIA6,PGP,PLEK,PLIN3,PPIA,PPIB,PRKAR2B,PSMA2,PSMD2,PXN,RAB43,RAB8A,RBM3,RELA,RNASEL,RPL7,S100A9,SEC23A,SET,SF1,SH3KBP1,SLC16A3,SYNCRIP,SYTL1,TAGLN2,TMOD3,TUBB1,UBE2I,UQCRC1,USO1,VWF	62 (36)	32	TBK1	IL4,IRGM
UHMK1	kinase		3			-1.477	4.48e-12	0.0096	AHR,AKT1,CDKN1B,CEBPA,CSF2,cytokine,E2F1,EIF2AK3,HIF1A,HNF4A,HRAS,HSF1,IKBKB,IL1B,IL6,IRF3,IRF4,JUN,MAPK8,MTOR,NFkB (complex),NFKB1,NFKBIA,NOS2,PPARG,RB1,REL,RELA,RGS10,RHOA,SP1,STAT3,STAT4,STMN1,SYN1,TP53,UHMK1	ACOT1,APOE,ATP5F1C,ATP5PO,AVIL,B2M,CCT3,CCT5,CD55,CNN3,COX6B1,CYCS,EIF3I,ERP29,FABP3,FABP5,FUBP1,GLRX,GNB1,GSK3A,HINT1,HNRNPA2B1,HNRNPM,HSPA5,HSPD1,HSPE1,HUWE1,ILK,KHSRP,MAPRE2,MIF,MINPP1,MMP25,MMRN1,MPDU1,NAP1L4,NAPA,NUCKS1,NUDC,OLR1,PDIA6,PGP,PLEK,PLIN3,PPIA,PPIB,PRKAR2B,PSMA2,PSMD2,PXN,RAB8A,RBM3,RELA,RNASEL,RPL7,S100A9,SF1,SH3KBP1,SLC16A3,STK4,SYTL1,TAGLN2,TREML1,UBE2I,VWF,WIPF1	66 (37)	34	ESR1	miR-1-3p (and other miRNAs w/seed GGAAUGU)			cholesterol
KW 2449	chemical drug		3			1.524	4.67e-12	0.0059	ABL1,Akt,APP,CASP8,CDKN1B,CTNNB1,cytarabine,ERK1/2,ESR1,FLT3,GPX1,IDH2,JAK2,KW 2449,MAPK8,MAPK9,MTOR,NFAT5,NFkB (complex),NFKBIA,P38 MAPK,PI3K (complex),PIK3R1,SIRT3,SNCA,STAT3,STAT5a/b,TP53,TP63,TP73	ACTB,AHCY,ATP1A1,ATP5F1C,ATP5PO,B2M,CD55,CD9,CDC42,CTSZ,CYCS,DBI,DSC1,FABP3,FCER1G,FKBP4,GLRX,GNB1,GSK3A,HINT1,HNRNPD,HNRNPH1,ILK,ITGA2B,KHSRP,LASP1,LTB4R,MAPRE2,MIF,MPDU1,MPPE1,NAP1L4,P4HB,PDIA6,PEBP1,PGLS,PGP,PLIN3,PPIA,PPIB,PRKAR2B,PSMD2,PXN,RAB5B,RAB8A,RBM3,RNASEL,RPL7,S100A9,SAMD9,SET,SLC44A2,STK4,SYNE2,TAGLN2,TMOD3,UBE2I,UQCRC1,USO1,VWF,WIPF1,ZYX	62 (30)	27					ABL1,AURK
CSL-HIF1A-MAML1-NICD	complex		3			-1.638	4.68e-12	0.0101	Akt,CDK2,CDKN1A,CSL-HIF1A-MAML1-NICD,EGFR,EIF4EBP1,FOS,HIF1A,IGF1R,IKBKB,IL1B,MAML1,MAPK1,MTOR,NFKB1,NFKBIA,NOTCH1,PPARG,PTEN,RBPJ,Smad2/3,TCF3,TP53,VEGFA	ACTB,AHCY,ALDOC,APOE,ATP1A1,ATP5F1C,ATP5PO,AVIL,CBFB,CCT5,CD55,CDC42,CNN3,COX6B1,CTSZ,ERP29,FABP3,FCER1G,FKBP4,FUBP1,GSK3A,GSTO1,HNRNPD,HNRNPH1,HSPA5,HSPD1,HSPE1,HUWE1,KHSRP,LASP1,LTB4R,MAPRE2,MIF,MPDU1,MPPE1,NAP1L4,NUCKS1,NUDC,P4HB,PABPC1,PCYT1A,PDIA6,PGP,PPIA,PPIB,PRKAR2B,PSMA2,PSMD2,RAB43,RAB8A,RBM3,RELA,RPL7,S100A9,SEC23A,SET,SLC16A3,SYNCRIP,THBS1,UBE2I,UQCRC1,USO1,ZYX	63 (24)	21
Ahr-aryl hydrocarbon-RelA	complex		3			-1.604	4.99e-12	0.0073	AHR,Ahr-aryl hydrocarbon,Ahr-aryl hydrocarbon-RelA,Akt,E2F1,EGFR,ERK,ESR1,IL22,JUN,MDM2,MITF,NFkB (complex),NR3C1,PI3K (complex),Pka,RB1,RELA,SMAD3,SMAD4,STAT5a/b,tanespimycin	ACTB,ATP1A1,B2M,CBFB,CCT5,CD9,CDC42,COX6B1,CYCS,DNAJB1,DSC1,EIF3I,FABP5,FCER1G,FKBP4,GNB1,HNRNPC,HNRNPH1,HNRNPM,HSP90B1,HSPA5,HSPD1,HSPE1,ILK,ITGA2B,LASP1,LTB4R,MMP25,MPPE1,MT-CO2,NUDC,OLR1,PABPC1,PDE4D,PGLS,PPIA,PRKAR2B,PSMD2,PXN,RAB5B,RBMX,RELA,S100A9,SAMD9,SH3KBP1,SLC16A3,SLC44A2,STK4,SYTL1,THBS1,TMOD3,TUBB1,UBE2I,UQCRC1,VWF,ZYX	56 (22)	20
CRYAB	other		3	Activated		2.047	5.06e-12	0.0065	26s Proteasome,AGO2,Akt,AKT1,ARG1,BAX,beta-estradiol,CASP3,CASP6,CASP9,caspase,CDK2,CRYAB,DICER1,EGFR,EIF2AK3,ERN1,ESR1,IL5,MAPK1,MAPK8,NCOA1,NCOA2,NFAT (complex),NFAT5,NFATC1,NR3C1,PAK2,PARP1,Pka,PTEN,RB1,RELA,STAT3,TP53	ACOT1,ACTB,AHCY,ALDOC,ATP5F1C,ATP6AP1,CCT5,CD55,CD9,CDC42,CNN3,COX6B1,DBI,DSC1,ERP29,FABP3,FKBP4,GNB1,GSK3A,GSTO1,HNRNPA2B1,HNRNPD,HNRNPH1,HNRNPM,HSP90B1,HSPE1,LASP1,LTB4R,MAPRE2,MIF,MMRN1,MPPE1,NAP1L4,NAPA,NT5DC2,NUDC,P4HB,PABPC1,PCYT1A,PDE4D,PDIA6,PGLS,PPIA,PPIB,PSMD2,PSMD6,RAB11FIP1,RAB43,RAB5B,RAB8A,RBM3,RNASEL,RPL7,SAMD9,SEC23A,SH3KBP1,SLC44A2,SRI,SYNCRIP,SYTL1,TBCB,THBS1,TMOD3,TUBB1,U2AF1/U…	69 (35)	30	AHR,ANGPT2,anisomycin,arsenite,ASPSCR1-TFE3,bortezomib,calpain inhibitor 2,cis-urocanic acid,EGFR,Insulin,lactacystin,metribolone,TP53,Z-LLL-CHO	budesonide,dithiothreitol,Ubiquitin		ACAN	NFAT (complex)
BATF	transcription regulator		3	Inhibited		-2.286	5.3e-12	0.0093	Akt,AR,BATF,CDK2,CEBPA,E2F1,FOS,GATA1,GATA3,Hif1,HIF1A,JUN,P38 MAPK,Pkc(s),PRDM1,RB1,SP1,SPI1,TCF3,TCF7,TGFB1,TP53	AHCY,ALDOC,APOE,ATP1A1,ATP5F1C,ATP5PO,ATP6AP1,CCT3,CCT5,CD55,CD9,CORO1C,CYCS,DBI,EIF3I,EIF4H,FABP5,FCER1G,FKBP2,FUBP1,GLRX,GSK3A,HINT1,HNRNPA2B1,HNRNPC,HNRNPH1,HSPD1,HSPE1,HUWE1,LASP1,LTB4R,MAPRE2,MMP25,MMRN1,MPPE1,MYL12A,NAP1L4,NUCKS1,NUDC,PCYT1A,PDE4D,PDIA6,PLEK,PPIA,PRKAR2B,PSMA2,PSMD2,PXN,RAB8A,RBM3,RPL7,S100A9,SLC16A3,SRI,TAGLN2,THBS1,TMOD3,TUBB1,UBE2I,USO1,WIPF1,ZYX	62 (22)	20	BACH2,CD3,Immunoglobulin,TCR	cyclosporin A		AHR,RORC	IL13,IL5,JUN
cis-urocanic acid	chemical drug		3			-1.364	5.32e-12	0.0164	AHR,CCND1,CEBPA,cis-urocanic acid,CSF2,cytokine,EGFR,HIF1A,HNF4A,HTR2A,IKBKB,IL1B,IL6,IRF3,IRF4,JAK2,JUN,MAPK8,NFkB (complex),NFKB1,NFKBIA,NOS2,PPARG,REL,RELA,SP1,STAT1,STAT4,TP53	ACOT1,APOE,ATP5F1C,ATP5PO,B2M,CCT5,CD55,CNN3,CYCS,DNAJB1,FABP3,FABP5,FCER1G,FKBP4,FUBP1,GLRX,GSK3A,HINT1,HNRNPA2B1,HNRNPD,HNRNPH1,HSPD1,HSPE1,HUWE1,ILK,KHSRP,MAPRE2,MIF,MINPP1,MMP25,MMRN1,MPDU1,NAP1L4,NUCKS1,NUDC,OLR1,PABPC1,PDIA6,PGP,PLEK,PLIN3,PPIA,PPIB,PRKAR2B,PSMA2,PSMD2,PXN,RAB8A,RBM3,RELA,RPL7,S100A9,SET,SF1,SH3KBP1,SLC16A3,STK4,SYTL1,TAGLN2,TMOD3,TUBB1,UBE2I,UQCRC1,USO1,VWF	65 (29)	28				CRYAB,HSPA1A/HSPA1B
FHL1	other		3			1.638	5.61e-12	0.0135	Akt,AKT1,CDK2,CDKN1A,EGFR,EIF4EBP1,FHL1,FOS,HIF1A,IGF1R,IKBKB,IL1B,MAPK1,MTOR,NFKB1,NOTCH1,PPARG,PTEN,RBPJ,Smad2/3,TCF3,TP53,VEGFA	ACTB,AHCY,ALDOC,APOE,ATP1A1,ATP5F1C,ATP5PO,AVIL,CBFB,CCT5,CD55,CDC42,CNN3,COX6B1,CTSZ,ERP29,FABP3,FCER1G,FKBP4,FUBP1,GSK3A,GSTO1,HNRNPD,HNRNPH1,HNRNPM,HSPA5,HSPD1,HSPE1,HUWE1,KHSRP,LASP1,LTB4R,MAPRE2,MIF,MPPE1,NAP1L4,NUCKS1,NUDC,P4HB,PABPC1,PCYT1A,PDIA6,PGP,PPIA,PPIB,PRKAR2B,PSMA2,PSMD2,RAB43,RAB8A,RBM3,RELA,RPL7,S100A9,SEC23A,SET,SLC16A3,SYNCRIP,THBS1,UBE2I,UQCRC1,USO1,ZYX	63 (23)	21	ERG,F2,TP53	CGA,mibolerone
DNM1L	enzyme	-1.197	3			-0.508	5.62e-12	0.0049	AHR,Akt,ATF2,BAX,CASP3,CCND1,CEBPA,CSF2,cytokine,DICER1,DNM1L,HIF1A,HNF4A,IKBKB,IL18,IL6,IRF3,IRF4,JUN,MAP3K7,MTOR,NFkB (complex),NFKB1,NFKBIA,NOS2,PARP1,PPARG,PTEN,REL,RELA,RIPK3,SP1,STAT1,STAT4,TP53	ACOT1,ACTB,APOE,ATP5F1C,ATP5PO,AVIL,CNN3,CYCS,DNAJB1,FABP3,FABP5,FCER1G,FKBP4,GLRX,GSK3A,HINT1,HNRNPA2B1,HNRNPH1,HSPD1,HUWE1,ILK,KHSRP,MAPRE2,MINPP1,MMP25,MMRN1,MPDU1,MPPE1,NAP1L4,NUCKS1,OLR1,PDIA6,PGP,PLEK,PLIN3,PPIA,PPIB,PRKAR2B,PSMA2,PSMD2,PXN,RAB43,RAB8A,RBM3,RELA,RNASEL,RPL7,SEC23A,SET,SF1,SH3KBP1,SLC16A3,STK4,SYNCRIP,SYTL1,TAGLN2,TMOD3,TUBB1,UBE2I,UQCRC1,USO1,VWF	62 (35)	32	bisphenol A,Cyclin B,cyclosporin A,PINK1,TP53	APP,EIF2AK3,mir-34,pifithrin alpha,TBC1D1		reactive oxygen species	CCNB1
PFDN5	transcription regulator		3			0.739	5.7e-12	0.0161	Akt,ATF4,BAK1,BAX,CCND1,CDK4/6,CDKN1A,CREB1,CTNNB1,ERK,F2,GLI1,HIF1A,MYC,MYOD1,NFKBIA,PFDN5,Pka,PTEN,RELA,SP1,TP53,TP73	ACTB,AHCY,ALDOC,B2M,CCT3,CD55,CNN3,CORO1C,COX6B1,CTSZ,CYCS,DBI,ERP29,FABP5,FKBP4,FUBP1,GLRX5,GSK3A,GSTO1,HINT1,HNRNPA2B1,HNRNPD,HNRNPH1,HSPD1,HSPE1,ILK,ITGA2B,LTB4R,MAPRE2,MIF,MPDU1,MPPE1,NAP1L4,NAPA,NUCKS1,NUDT21,OLR1,P4HB,PDE4D,PDIA6,PLIN3,PPIA,PRKAR2B,PSMD2,RAB43,RAB8A,RAB8B,RBM3,RBMX,RNASEL,RPL7,SEC23A,SH3KBP1,SLC16A3,STK4,SYNCRIP,SYNE2,SYTL1,TAGLN2,TES,THBS1,TUBB1,UBE2I,USO1,VWF,ZYX	66 (23)	22
FAT1	other		3	Activated		2.926	5.99e-12	0.0022	AKT1,AR,CAMK2,CD247,CHUK,Creb,CTNNB1,E2F1,EGFR,EIF4E,ESR1,FAT1,GATA1,GIT1,HIF1A,HRAS,IKBKB,IRF4,JAK2,JUN,KRAS,MAPK1,NFkB (complex),NFKB1,NFKBIA,OGT,P38 MAPK,PI3K (complex),Pkc(s),PKD1,RELA,RET,SNCA,SP1,SRC,STAT5a/b,STAT6,SYK,TCF3,TGFB1,TLR3,TP53,TP73,WBP2,YAP1,ZAP70	APOE,ARHGAP10,ATP5F1C,ATP6AP1,CCT3,CCT5,CD55,CORO1C,CTSZ,CYCS,DNM3,DSC1,EIF3I,EIF4H,ERP29,FABP5,FKBP2,FUBP1,GLRX3,GSK3A,HINT1,HNRNPA2B1,HNRNPC,HNRNPD,HNRNPH1,HNRNPH3,HNRNPM,HSPE1,HUWE1,ITGA2B,KHSRP,LASP1,LTB4R,MAPRE2,MMP25,MPDU1,MYL12A,NAP1L4,NUCKS1,NUDC,PABPC1,PDE4D,PDIA6,PGLS,PLEK,PLIN3,PPIB,PRKAR2B,PSMC6,PSMD2,PSMD6,PXN,RAB5B,RAB8A,RBM3,RCSD1,RPL7,SAMD9,SEPTIN2,SEPTIN7,SET,SH3KBP1,SLC44A2,SRI,…	73 (46)	43	geldanamycin,TP53			JUN	ZEB1
IL4	cytokine		2	Inhibited		-3.347	6.03e-12	0.019	Akt,AKT1,ARG1,BAX,EGFR,GATA1,GPX4,IFNG,Ige,IKBKB,IKZF3,IL11,IL4,IL6,IRS2,JAK2,JUN,KDM6B,LIF,MAPK1,MMP3,NFKBIA,PI3K (complex),PIK3R1,PPARG,REL,RELA,SFPQ,SMAD3,SP1,STAT4,SYK,TP53	ACTB,AHCY,ALDOC,APRT,ATP1A1,ATP5F1C,ATP5PO,CCT5,CD55,CNN3,CTSZ,DBI,DNM3,ERP29,ERP44,FABP3,FCER1G,FUBP1,GLRX,GSK3A,HINT1,HNRNPA2B1,HNRNPD,HNRNPH1,HNRNPH3,HNRNPM,HSP90B1,HSPE1,ILK,LASP1,LTB4R,MAPRE2,MINPP1,MPDU1,MPPE1,NAP1L4,NAPA,NUDC,NUDT21,P4HB,PABPC1,PDIA6,PGP,PLIN3,PPIA,PRKAR2B,PSMA2,PSMD2,RAB8A,RBM3,RCSD1,RELA,S100A9,SAMD9,SET,SF1,SH3KBP1,SLC16A3,STK4,SYNCRIP,SYTL1,TAGLN2,TES,TUBB1,U2AF1/U2AF1…	70 (33)	33	APEX1,ARRB2,CD247,CD28,CD3,chrysotile asbestos,cytarabine,ERN1,FYN,HIF1A,Insulin,MKNK,MTOR,MTORC1,MTORC2,NFAT (complex),penicillamine,PLX5622,PRKG1,SERPINE2,simvastatin,SKP2,SLC22A3,TCR,Ubiquitin,VIP,W146,YY1	ADORA1,BACH2,budesonide,cadmium,CBLB,cyclosporin A,fisetin,GABA,glycyrrhizic acid,NFATC3,NT5E,salvianolic acid B		APH1A,ARG2,arginase,BANF1,CCNE1,CD8A,CXCR4,EGFR,Esrra,FLT1,FN1,FURIN,GIMAP1-GIMAP5,GZMA,HK2,HSPA1A/HSPA1B,IGF2R,JUN,KLK3,KRT19,NABP1,NDRG1,NFIL3,NFKB1,PKM,PLCG1,PRKCA,RHOA,RPS19,RPS6KB1,SDF4,SELP,SFPQ,SPINK1,SPN,SREBF1,TGM2,thymidine kinase,VPS35,XBP1,XRCC6	ALOX5,CD8B,F2R,GPX4,IFI16,Igtp,IL23,ITGAV,MEFV,ZBP1
2-amino-2-norbornanecarboxylic acid	chemical toxicant		3			-0.535	6.11e-12	0.0091	2-amino-2-norbornanecarboxylic acid,Akt,AKT1,AMPK,Ap1,CCND1,CDKN1B,Creb,HMGA1,MTOR,MTORC1,MYC,p70 S6k,PDX1,RELA,RICTOR,SREBF1,SREBF2,TFEB,TP53	ALDOC,APOE,ATP1A1,ATP5PO,ATP6AP1,AVIL,CCT3,CNN3,CYCS,DBI,FABP3,FCER1G,FKBP4,FUBP1,GLRX5,GSK3A,HNRNPA2B1,HNRNPD,HNRNPH1,HNRNPM,HSP90B1,HSPA5,HSPE1,ILK,ITGA2B,LTB4R,MAPRE2,MIF,MPPE1,MT-CO2,NAP1L4,NUDT21,OLR1,P4HB,PDIA6,PGP,PLIN3,PPIA,PPIB,PSMA2,PSMC6,PSMD2,PSMD6,RAB8A,RBM3,S100A9,SEPTIN2,SH3KBP1,SLC16A3,STK4,SYTL1,TES,TUBB1,UBE2I,UQCRC1,USO1	56 (20)	17					MTORC1
Cryptochrome	group		3			0.593	6.15e-12	0.0202	Akt,AR,ATF4,CCND1,CDK4/6,CLOCK,CREB1,CRY1,Cryptochrome,CTNNB1,F2,FOS,GATA1,GCK,GLI1,HIF1A,MED1,MYC,NCOA2,NFKBIA,NR1H4,NR3C1,Pka,PTEN,RELA,SP1,STAT3,TP53,TP73	ACOT1,ACTB,AHCY,ALDOC,ATP5F1C,ATP5PO,ATP6AP1,CBFB,CCT3,CD9,CORO1C,COX6B1,CTSZ,CYCS,DBI,ERP29,FABP5,FCER1G,FKBP4,FUBP1,GLRX5,GSK3A,HINT1,HNRNPA2B1,HNRNPD,HNRNPH1,HSPD1,HSPE1,HUWE1,ILK,MAPRE2,MIF,MPDU1,MPPE1,NAP1L4,NAPA,NUCKS1,NUDT21,OLR1,P4HB,PDE4D,PLEK,PLIN3,PPIA,PSMA2,PSMD2,RAB43,RAB8A,RAB8B,RBM3,RBMX,RNASEL,RPL7,S100A9,SEC23A,SH3KBP1,SLC16A3,STK4,SYNCRIP,SYNE2,SYTL1,TAGLN2,TES,THBS1,TUBB1,UBE2I…	71 (29)	27
UXT	transcription regulator		3			-0.577	6.17e-12	0.0174	AHR,Akt,AKT1,AR,BAX,CASP8,CCND1,CEBPA,Creb,CREB1,CSF2,cytokine,EGFR,ERBB2,ESR1,HIF1A,HNF4A,IKBKB,IL1B,IL6,IRF4,JUN,MAPK1,MAPK8,NCOA2,NFkB (complex),NFKB1,NFKBIA,NOS2,P38 MAPK,Pka,PPARG,REL,RELA,SP1,STAT4,STUB1,TP53,UXT	ACOT1,APOE,ATP5F1C,ATP5PO,ATP6AP1,CCT3,CCT5,CD9,CNN3,COX6B1,CYCS,DNAJB1,DNM3,DSC1,ERP29,FABP3,FABP5,FKBP4,GLRX,GNB1,GSTO1,HINT1,HNRNPA2B1,HNRNPH1,HNRNPM,HSPA5,HSPD1,HSPE1,HUWE1,ILK,KHSRP,MAPRE2,MIF,MINPP1,MMP25,MMRN1,MPDU1,MPPE1,MT-CO2,NAP1L4,NUCKS1,NUDC,OLR1,PABPC1,PDE4D,PDIA6,PGLS,PGP,PLEK,PLIN3,PPIA,PPIB,PRKAR2B,PSMA2,PSMD2,PXN,RAB5B,RAB8A,RBM3,RBMX,RELA,RPL7,S100A9,SAMD9,SF1,SLC16A3,SLC44A2,S…	75 (39)	38		CD 437,cholesterol,ST1926			ATR,BUB1,CHEK1,Cyclin A,F5,KLK3,TTK
VPS26A	transporter	1.618	3			1.116	6.27e-12	0.0111	Akt,AKT1,AR,CCNE1,CD247,CD3,Creb,CREB1,CREBBP,EGFR,EP300,ERBB2,ERK1/2,ESR1,HIF1A,IGF2R,MAPK1,MAPK7,NCOA2,NFkB (complex),NR4A1,PLG,RELA,SRC (family),SREBF2,STUB1,TGFB1,VPS26A,ZAP70	ACOT1,ACTB,ALDOC,ATP1A1,ATP5F1C,ATP5PO,ATP6AP1,B2M,CBFB,CCT3,CD55,CD9,CNN3,CORO1C,COX6B1,CYCS,DBI,DNM3,DSC1,EIF4H,ERP29,FABP5,FKBP4,FUBP1,GNB1,GSK3A,GSTO1,HNRNPA2B1,HNRNPC,HNRNPM,HSPA5,HSPD1,HSPE1,ILK,LASP1,LTB4R,MIF,MMRN1,MPPE1,MT-CO2,MYL12A,NUCKS1,NUDC,P4HB,PABPC1,PCYT1A,PGLS,PLIN3,PPIA,RAB5B,RBM3,RBMX,SAMD9,SLC16A3,SLC44A2,SNX27,SRI,SYTL1,THBS1,TMOD3,TUBB1,UQCRC1,USO1,VPS4B,WIPF1	65 (29)	28				SNX27	APP,IGF2R
reactive oxygen species	chemical toxicant		2			-0.843	6.36e-12	0.0091	26s Proteasome,Akt,Creb,CREB1,DUSP1,EGFR,EGLN,EIF2AK3,ERN1,Hif1,HIF1A,JAK2,MAP3K7,NFE2L2,NFkB (complex),NFKB1,Nos,PI3K (complex),PKM,PTEN,reactive oxygen species,ROCK2,Smad2/3,SP1,SP3,STAT3,SYK,TGFB1,TLR2,TNF,TP53	ACTB,AHCY,ATP5F1C,ATP5PO,CBFB,CCT3,CCT5,CNN3,CORO1C,CTSZ,DBI,DSC1,EIF4H,ERP29,FKBP2,FKBP4,FUBP1,GSK3A,GSTO1,HINT1,HNRNPC,HNRNPD,HNRNPH1,HSPA5,HSPE1,HUWE1,KHSRP,LASP1,MAPRE2,MPPE1,MYL12A,NAP1L4,NAPA,NUCKS1,NUDC,OLR1,PABPC1,PCYT1A,PDE4D,PGLS,PLIN3,PPIA,PPIB,PSMA2,PSMD6,PXN,RAB43,RAB8A,RBM3,RBMX,RCSD1,RNASEL,RPL7,S100A9,SAMD9,SEC23A,SET,SH3KBP1,SLC16A3,SRI,SYNCRIP,SYTL1,TAGLN2,TBCB,TMOD3,UBE2I,UQCRC…	69 (31)	31	3,3'-diindolylmethane,5-fluorouracil,5-hydroxytryptamine,7-ketocholesterol,ABL1,aldosterone,andrographolide,ANGPT2,AOPEP,APP,arginase,arsenic,arsenic trioxide,arsenite,BCR-ABL1,bisphenol A,bortezomib,bufalin,cadmium,caffeic acid,capsaicin,CD28,CD3,celecoxib,cholesterol,chrysotile asbestos,CUL4B,curcumin,CYBB,cytarabine,dasatinib,DCN,DDIT4,dichloroacetic acid,DNM1L,DNM2,Esrra,F2,farnesol,FYN,gelda…	1,2-dithiol-3-thione,10-(6'-ubiquinonyl)decyltriphenylphosphonium,1D-chiro-inositol,ADCYAP1,AMD1,apigenin,ascorbic acid,CDK4/6,COPS5,cyclosporin A,dimethyl fumarate,dimethyl sulfoxide,dithiothreitol,DNAJB1,heparin,Hif,HSF1,IDH2,IMMT,IRGM,L-carnitine,lanthanum chloride,levodopa,N-acetyl-L-cysteine,NDUFA11,NFE2,NQO1,NRF1,PARK7,pifithrin alpha,POU2F1,pravastatin,PRKN,propionyl-L-carnitine,simvastati…		APEX1,CCN2,CXCR4,ERN1,HIF1A,MUC5AC,NFATC3,NFKB1,PRDX5,RHOA	cardiolipin,PKM,SP4
3,3'-diindolylmethane	chemical drug		2			0.272	6.49e-12	0.0067	3,3'-diindolylmethane,Akt,BIRC5,CTNNB1,EGFR,ERBB2,ESR2,Hif1,NFkB (complex),NFKBIA,P38 MAPK,STAT1,STAT3,TP53	ACTB,AHCY,ALDOC,ATP1A1,ATP5F1C,ATP5PO,B2M,CCT3,CCT5,CD55,CD9,CDC42,CNN3,CTSZ,DBI,FCER1G,FKBP4,FUBP1,GSK3A,HNRNPA2B1,HNRNPH1,HSP90B1,HSPE1,ILK,ITGA2B,LASP1,LTB4R,MAPRE2,MIF,MPDU1,MPPE1,MYL12A,NAP1L4,NUDC,OLR1,P4HB,PDIA6,PLIN3,PPIA,PSMD2,PXN,RAB8A,RBM3,RELA,RPL7,SLC16A3,SYNCRIP,TAGLN2,TUBB1,UQCRC1,USO1,VWF,WIPF1,ZYX	54 (14)	14				KRT19,NQO1,reactive oxygen species,TP53	BIRC5,CYP1A2,EGFR,ZEB1
Jun-ATF2	complex		3	Activated		2.474	6.96e-12	0.0072	Akt,AR,ATF2,CDK2,E2F1,FOS,GATA1,Hif1,HIF1A,JUN,Jun-ATF2,RB1,SP1,SPI1,TCF3,TGFB1,TP53	ACTB,AHCY,ALDOC,APOE,ATP1A1,ATP5F1C,ATP5PO,ATP6AP1,CCT3,CCT5,CD9,CORO1C,CYCS,DBI,EIF3I,EIF4H,FABP5,FCER1G,FKBP2,FUBP1,GSK3A,HINT1,HNRNPA2B1,HNRNPC,HNRNPH1,HSPD1,HSPE1,HUWE1,LASP1,LTB4R,MAPRE2,MPPE1,MYL12A,NAP1L4,NUCKS1,NUDC,OLR1,PCYT1A,PDE4D,PDIA6,PLEK,PPIA,PRKAR2B,PSMA2,PSMD2,PXN,RAB8A,RBM3,RPL7,S100A9,SLC16A3,SRI,TAGLN2,THBS1,TMOD3,TUBB1,USO1,WIPF1,ZYX	59 (17)	16
USP27X	peptidase		3			-1.05	7.11e-12	0.008	Akt,AKT1,ATF2,CCNE1,CDK2,CDKN1A,CDKN1B,CGAS,CTNNB1,Cyclin E,E2F1,EIF4EBP1,IFNA2,IFNB1,IKBKB,IRF3,JUN,MTOR,NFkB (complex),NFKBIA,P38 MAPK,PEBP1,RB1,REL,RELA,SMAD3,SMARCA4,SNAI2,STAT1,TBK1,TP53,USP27X,WT1,YAP1	ACTB,APRT,ATP1A1,ATP5F1C,ATP5PO,AVIL,B2M,CD55,CD9,CDC42,CNN3,COX6B1,CTSZ,CYCS,DBI,EIF3I,FCER1G,FKBP4,FUBP1,GSK3A,GSTO1,HNRNPA2B1,HNRNPM,HSPD1,HSPE1,LASP1,LTB4R,MAPRE2,MIF,MINPP1,MMP25,MPDU1,MPPE1,MT-CO2,NAP1L4,NUDC,P4HB,PCYT1A,PDIA6,PGP,PLIN3,PRKAR2B,PXN,RAB8A,RBM3,RELA,RNASEL,RPL7,S100A9,SAMD9,SH3KBP1,SLC16A3,STK4,SYTL1,TAGLN2,USO1,WIPF1,ZYX	58 (34)	31		5-fluorouracil		TBK1
PKM	kinase	-1.404	2			-1.753	7.19e-12	0.0058	CDK2,CTNNB1,EGFR,ERBB2,HIF1A,JAK2,KIT,MAP2K1,MAPK1,PAK2,PKM,PLCG1,RET,STAT1,STAT3,SYK,TGM2,TP53	ACTB,AHCY,ALDOC,APOE,ATP1A1,ATP1B3,ATP5F1C,ATP5PO,B2M,CCT5,CD9,CDC42,CNN3,DBI,ERP29,FABP5,FKBP4,FUBP1,GSK3A,HNRNPA2B1,HNRNPD,HNRNPH1,HSPD1,HSPE1,HUWE1,ILK,ITGA2B,LASP1,LTB4R,MAPRE2,MIF,MPPE1,MT-CO2,NAP1L4,NUCKS1,NUDC,P4HB,PABPC1,PCYT1A,PDIA6,PGLS,PLIN3,PPIA,PSMD2,RAB8A,RBM3,RCSD1,RELA,RPL7,SET,SLC16A3,TUBB1,UBE2I,USO1,ZYX	55 (18)	18	BCR-ABL1,FSH,IL4,IL5,Insulin,LINC01139,metribolone,MTOR,N-acetyl-L-cysteine,NFYA,NQO1,PCGEM1,PI3K (family),STK11,USP29,ZEB1	cyclosporin A,mir-122,miR-122-5p (miRNAs w/seed GGAGUGU),mir-34,miR-9-5p (and other miRNAs w/seed CUUUGGU),reactive oxygen species,RORC		ABL1,BUB3,CCDC6,cholesterol,elastase,HK2,MPO,TGM2,UDP-D-glucose	PLCG1,TFAM
ACKR3	G-protein coupled receptor		2			-1.982	7.29e-12	0.0012	ACKR3,CCNE1,EGFR,ERK,ERK1/2,Jnk,P38 MAPK,TP53,ZAP70	ACTB,AHCY,APOE,ATP1A1,ATP5F1C,B2M,CCT5,CD55,CNN3,DBI,FABP5,FKBP4,FUBP1,GSK3A,HNRNPA2B1,HNRNPD,HNRNPH1,HSP90B1,HSPA5,HSPD1,HSPE1,ILK,ITGA2B,LASP1,LTB4R,MAPRE2,MIF,MT-CO2,NAP1L4,NUDC,P4HB,PABPC1,PCYT1A,PDIA6,PPIA,PSMD2,RAB8A,RPL7,TAGLN2,UQCRC1,USO1,VPS4B,ZYX	43 (9)	8	AHR,IL13	ESR1		CCNB1,EGFR,KDM4A	CCNE1,TP53
NSD1	transcription regulator		3			0	7.37e-12	0.0077	AHR,Akt,AKT1,AR,CASP1,CCND1,CEBPA,Creb,CREB1,CSF2,cytokine,EGFR,ERBB2,ESR1,HIF1A,HNF4A,IKBKB,IL18,IL6,IRF4,JUN,MAPK1,NCOA2,NFkB (complex),NFKB1,NFKBIA,NOS2,NSD1,Pka,PPARG,REL,RELA,SP1,STAT4,STUB1,TP53	ACOT1,APOE,ATP5F1C,ATP5PO,ATP6AP1,CCT3,CCT5,CNN3,COX6B1,CYCS,DNAJB1,DNM3,DSC1,ERP29,FABP3,FABP5,FKBP4,FUBP1,GLRX,GNB1,GSTO1,HINT1,HNRNPA2B1,HNRNPH1,HNRNPM,HSPA5,HSPD1,HUWE1,ILK,KHSRP,MAPRE2,MINPP1,MMP25,MMRN1,MPDU1,MPPE1,MT-CO2,NAP1L4,NUCKS1,NUDC,OLR1,PABPC1,PDE4D,PGLS,PGP,PLEK,PLIN3,PPIA,PPIB,PRKAR2B,PSMA2,PSMD2,PXN,RAB5B,RAB8A,RBM3,RBMX,RELA,RPL7,SAMD9,SET,SF1,SLC16A3,SLC44A2,SYTL1,THBS1,TMOD3,…	72 (36)	34	ESR1
CXCL14	cytokine		3			-0.272	7.38e-12	0.0042	26s Proteasome,Creb,CXCL14,EGFR,ERK,FARP2,GABA,GLI1,IRF3,ITGB3,MAPK1,Mek,NFE2L2,NFkB (complex),NFKB1,P38 MAPK,Pka,PRL,RAF1,Rap1,RASSF5,RELA,SRF,STAT3	ACTB,APOE,ATP1A1,ATP6AP1,CCT3,CCT5,CD9,CDC42,CNN3,ERP29,FABP5,GNB1,GSTO1,HNRNPA2B1,HNRNPC,HNRNPD,HNRNPH1,HNRNPM,HSP90B1,HSPA5,HSPE1,HUWE1,ILK,ITGA2B,KHSRP,MIF,MT-CO2,NUDC,OLR1,P4HB,PABPC1,PDE4D,PDIA6,PLIN3,PPIA,PPIB,PSMD2,PSMD6,RAB5B,RAB8B,RELA,RNASEL,RPL7,S100A9,SAMD9,SEC23A,SH3KBP1,SLC16A3,STK4,SYTL1,TMOD3,U2AF1/U2AF1L5,USO1,WIPF1	54 (24)	22	EGFR	hydroxypropyl-beta-cyclodextrin,LGALS1		cholesterol,D-glucose	GABA
SNS 314	chemical drug		3			0.143	7.68e-12	0.0025	AKT1,AURKA,AURKB,BIRC5,BRCA1,ERK1/2,MYC,NFKBIA,PKM,RASSF1,SDCBP,SNS 314,SRC (family),TP53	ACTB,APOE,ATP1A1,ATP5F1C,B2M,CCT3,CDC42,CNN3,COX6B1,CTSZ,CYCS,DBI,FABP5,FKBP4,FUBP1,GLRX5,GSK3A,HNRNPA2B1,HNRNPD,HNRNPH1,HNRNPM,HSPE1,ILK,ITGA2B,LASP1,LTB4R,MAPRE2,MIF,MPDU1,MT-CO2,NAP1L4,OLR1,P4HB,PDIA6,PEBP1,PGLS,PPIA,PSMD2,RAB8A,RBM3,RPL7,SLC16A3,TES,TUBB1,UBE2I,UQCRC1,USO1,VWF,ZYX	49 (14)	11					AURKA
TT-00420	chemical drug		3			0.143	7.68e-12	0.0025	AKT1,AURKA,AURKB,BIRC5,BRCA1,ERK1/2,MYC,NFKBIA,PKM,RASSF1,SDCBP,SRC (family),TP53,TT-00420	ACTB,APOE,ATP1A1,ATP5F1C,B2M,CCT3,CDC42,CNN3,COX6B1,CTSZ,CYCS,DBI,FABP5,FKBP4,FUBP1,GLRX5,GSK3A,HNRNPA2B1,HNRNPD,HNRNPH1,HNRNPM,HSPE1,ILK,ITGA2B,LASP1,LTB4R,MAPRE2,MIF,MPDU1,MT-CO2,NAP1L4,OLR1,P4HB,PDIA6,PEBP1,PGLS,PPIA,PSMD2,RAB8A,RBM3,RPL7,SLC16A3,TES,TUBB1,UBE2I,UQCRC1,USO1,VWF,ZYX	49 (14)	11					AURKA
XMD16-144	chemical drug		3			0.143	7.68e-12	0.0025	AKT1,AURKA,AURKB,BIRC5,BRCA1,ERK1/2,MYC,NFKBIA,PKM,RASSF1,SDCBP,SRC (family),TP53,XMD16-144	ACTB,APOE,ATP1A1,ATP5F1C,B2M,CCT3,CDC42,CNN3,COX6B1,CTSZ,CYCS,DBI,FABP5,FKBP4,FUBP1,GLRX5,GSK3A,HNRNPA2B1,HNRNPD,HNRNPH1,HNRNPM,HSPE1,ILK,ITGA2B,LASP1,LTB4R,MAPRE2,MIF,MPDU1,MT-CO2,NAP1L4,OLR1,P4HB,PDIA6,PEBP1,PGLS,PPIA,PSMD2,RAB8A,RBM3,RPL7,SLC16A3,TES,TUBB1,UBE2I,UQCRC1,USO1,VWF,ZYX	49 (14)	11					AURKA
EIF2A	translation regulator		3	Inhibited		-2.566	7.71e-12	0.0243	Akt,AKT1,APP,ATF3,ATF4,C/EBP,CEBPA,CEBPB,DDIT3,EGFR,EIF2A,ERK1/2,glucocorticoid,HIF1A,IL2,JUN,NFE2L2,NFkB (complex),NFKBIA,P38 MAPK,PPARA,PPARG,progesterone,RELA,RHOA,SREBF1,SREBF2,Srebp,STAT1,STAT3,STAT5a/b,STAT5B,TP53	ACOT1,ALDOC,APOE,ATP1A1,ATP5F1C,ATP5PO,AVIL,B2M,CCT3,CCT5,CD55,CNN3,CTSZ,DBI,ERP29,FABP3,FABP5,FKBP4,FUBP1,GLRX,GSK3A,GSTO1,HNRNPA2B1,HNRNPD,HNRNPH1,HNRNPM,HSP90B1,HSPD1,HSPE1,HUWE1,ILK,LTB4R,MAPRE2,MMP25,MMRN1,MPDU1,MPPE1,NAP1L4,NAPA,NUCKS1,NUDC,NUDT21,P4HB,PABPC1,PCYT1A,PDIA6,PLIN3,PPIA,PPIB,PSMD2,PXN,RAB8A,RBM3,RELA,RNASEL,RPL7,S100A9,SEC23A,SF1,SH3KBP1,SRI,STK4,SYTL1,TAGLN2,TUBB1,UBE2I,WIPF1	67 (33)	30	5-fluorouracil,APP,arsenite,ATP2A1,bortezomib,CHCHD4,CYBB,D-glucose,EIF2AK3,MMP11,NDUFA11,PEMT,PRNP,RETREG1,salinosporamide A,salvianolic acid B,thapsigargin,tunicamycin,Z-LLL-CHO,Z36	4-phenylbutyric acid,ALOX5,carfilzomib,curcumin,ERN1,HSF1,Immunoglobulin,L-methionine,N-acetyl-L-cysteine,RPL22,SEC23B,STXBP3,WNT5B			LCN2
AMG 900	chemical drug		3			0.143	7.9e-12	0.0025	AKT1,AMG 900,AURKA,AURKB,BIRC5,BRCA1,ERK1/2,MYC,NFKBIA,PKM,RASSF1,SDCBP,SRC (family),TP53	ACTB,APOE,ATP1A1,ATP5F1C,B2M,CCT3,CDC42,CNN3,COX6B1,CTSZ,CYCS,DBI,FABP5,FKBP4,FUBP1,GLRX5,GSK3A,HNRNPA2B1,HNRNPD,HNRNPH1,HNRNPM,HSPE1,ILK,ITGA2B,LASP1,LTB4R,MAPRE2,MIF,MPDU1,MT-CO2,NAP1L4,OLR1,P4HB,PDIA6,PEBP1,PGLS,PPIA,PSMD2,RAB8A,RBM3,RPL7,SLC16A3,TES,TUBB1,UBE2I,UQCRC1,USO1,VWF,ZYX	49 (14)	11					AURKA
TTP607	chemical drug		3			0.143	7.9e-12	0.0025	AKT1,AURKA,AURKB,BIRC5,BRCA1,ERK1/2,MYC,NFKBIA,PKM,RASSF1,SDCBP,SRC (family),TP53,TTP607	ACTB,APOE,ATP1A1,ATP5F1C,B2M,CCT3,CDC42,CNN3,COX6B1,CTSZ,CYCS,DBI,FABP5,FKBP4,FUBP1,GLRX5,GSK3A,HNRNPA2B1,HNRNPD,HNRNPH1,HNRNPM,HSPE1,ILK,ITGA2B,LASP1,LTB4R,MAPRE2,MIF,MPDU1,MT-CO2,NAP1L4,OLR1,P4HB,PDIA6,PEBP1,PGLS,PPIA,PSMD2,RAB8A,RBM3,RPL7,SLC16A3,TES,TUBB1,UBE2I,UQCRC1,USO1,VWF,ZYX	49 (14)	11					AURKA
MOB1A	other	1.95	3	Inhibited		-2.598	7.92e-12	0.0044	cytarabine,LATS,MOB1A,MYC,NUAK1,P38 MAPK,RELA,STK38,STK38L,TP53,YAP1	ACTB,APOE,ATP1A1,ATP5F1C,CCT3,CD55,CNN3,COX6B1,CYCS,DBI,FABP5,FKBP4,FUBP1,GLRX5,GSK3A,HNRNPA2B1,HNRNPD,HNRNPH1,HSP90B1,HSPE1,ILK,ITGA2B,LASP1,LTB4R,MAPRE2,MIF,MMP25,MT-CO2,NAP1L4,NUDT21,P4HB,PDIA6,PPIA,PSMD2,PXN,RAB8A,RBM3,RELA,RPL7,SH3KBP1,SLC16A3,STK4,SYTL1,TES,UBE2I,UQCRC1,USO1,ZYX	48 (11)	7		CD 437,CUL7,ST1926		LATS,STK38L
7beta-hydroxycholesterol	chemical - endogenous mammalian		3	Activated		2.286	8e-12	0.0038	7beta-hydroxycholesterol,ADAM17,ADRB2,Akt,AKT1,CDK2,CHUK,CLOCK,Creb,CREB1,EGFR,EIF4E,ERBB2,HIF1A,HMGA1,HSF1,IKBKB,JUN,LPL,MAP3K7,MAPK1,MAPK8,NFKBIA,Notch,P38 MAPK,PARP1,PI3K (complex),PPARA,PRKCA,PRKG1,RAF1,RARA,RB1,RGS2,RORA,RORC,SFPQ,STAT5a/b,TEAD1,TP53,TP73	ACTB,ALDOC,APOE,ATP5F1C,CBFB,CCT3,CD55,CNN3,COX6B1,CTSZ,CYCS,DBI,DNAJB1,ERP29,FABP3,FKBP4,FUBP1,GSK3A,HINT1,HNRNPA2B1,HNRNPH1,HNRNPM,HSPE1,HUWE1,ILK,LTB4R,MIF,MPDU1,MPPE1,NAP1L4,NUCKS1,NUDC,P4HB,PABPC1,PCYT1A,PDIA6,PGLS,PLIN3,PPIA,PPIB,PRKAR2B,PSMD2,RAB1B,RAB8A,RBM3,RBMX,RNASEL,RPL7,S100A9,SAMD9,SEC23A,SEPTIN2,SF1,SYNE2,TAGLN2,THBS1,TMOD3,TUBB1,U2AF1/U2AF1L5,UBE2I,USO1,VWF	62 (41)	38					PRKCA,RORC
clofarabine	chemical drug		3			0.412	8.11e-12	0.0044	ADORA1,ADORA2A,ADORA3,clofarabine,Creb,CREB1,EGFR,ERK1/2,MAPK1,NFkB (complex),NFKBIA,P38 MAPK,PIK3CG,Pka,RRM2B,STAT1,TP53	ACTB,AHCY,ALDOC,APOE,ATP5F1C,ATP6AP1,B2M,CCT5,CD55,CD9,CNN3,CTSZ,DBI,ERP29,FABP5,FKBP4,FUBP1,GSK3A,HNRNPA2B1,HNRNPD,HNRNPH1,HSP90B1,HSPD1,HSPE1,ILK,LASP1,LTB4R,MAPRE2,MIF,MPDU1,MT-CO2,NAP1L4,NAPA,NUDC,OLR1,P4HB,PABPC1,PDE4D,PDIA6,PLIN3,PPIA,PSMD2,PXN,RAB8A,RBM3,RBMX,RPL7,SH3KBP1,SLC16A3,UBE2I,UQCRC1,WIPF1,ZYX	53 (17)	13					ADORA1,ADORA2A
D-glucose	chemical - endogenous mammalian		2			-0.943	8.39e-12	0.0139	26s Proteasome,AHR,Akt,AKT1,Cdc42,CDK2,CEBPA,CREB1,D-glucose,E2F1,EGFR,EIF2AK3,EIF4E,ERN1,FGF2,GAPDH,GCK,HIF1A,IGF1R,JAK2,MAPK1,MTOR,NFKB1,NFKBIA,NOX4,OGT,PARP1,Pka,PTEN,RB1,RELA,SIRT1,SP1,STAT1,STAT5B,SYK,TGM2,TLR2,TP53,TSC2	ACOT1,ACTB,AHCY,ALDOC,ATP1B3,ATP5F1C,AVIL,CBFB,CCT5,CD55,CD9,CDC42,CNN3,COX6B1,CTSZ,DBI,DNAJB1,DNM3,DPP7,EIF3I,ERP29,FCER1G,FKBP2,FKBP4,FUBP1,GLRX,HINT1,HNRNPD,HNRNPH1,HNRNPM,HSPA5,HSPD1,HUWE1,ILK,KHSRP,LTB4R,MAPRE2,MIF,MMP25,MPDU1,MPPE1,NAP1L4,NAPA,NUCKS1,PABPC1,PCYT1A,PDE4D,PDIA6,PGP,PLIN3,PPIA,PPIB,PSMC6,PSMD6,RAB43,RAB8A,RBM3,RBMX,RCSD1,RELA,RNASEL,SEC23A,SET,STK4,SYNCRIP,TAGLN2,TBCB,THBS1,TM…	72 (40)	40	8-chlorophenylthio-adenosine 3',5'-cyclic monophosphate,ADCYAP1,aldosterone,ascorbic acid,CXCL14,F2,HSF1,LCAT,MPO,NFYA,OPA1,OXT,PEMT,RORC,silibinin,SREBF2	2,4-dinitrophenol,3-hydroxyanthranilic acid,4-phenylbutyric acid,7alpha-hydroxycholesterol,APOA1,atenolol,bisphenol A,caffeine,Congo Red,curcumin,epicatechin gallate,ESR1,HRH3,hyodeoxycholic acid,IL13,Immunoglobulin,KISS1R,L-methionine,LCN2,manganese chloride,NCEH1,PICK1,PTPN11,PTTG1,rosiglitazone,S-equol,vanadate		ACAC,AHR,ANGPT2,APOC3,APP,arginase,Calm1 (includes others),CCN2,CCNE1,cholesterol,Collagen type IV,CXCR4,CYBB,DCN,DDIT4,EGFR,EIF2A,EIF2AK3,ERN1,FN1,ID1,IGF2R,IPMK,JUN,miR-30c-5p (and other miRNAs w/seed GUAAACA),MTOR,MTORC1,Na+,PARK7,PI3K (family),PINK1,PLA2G4A,PLCG1,RHOA,RPS14,RPS6KB1,SELP,TGM2,Thrombospondin,XBP1	CBL,CCNB1,CETP,GABA,glutathione peroxidase,MTORC2,NRF1,SIRT7,TFAM,TXNRD1
CCDC6	other		3			1.588	8.39e-12	0.0229	Akt,AKT1,AR,CASP8,CCDC6,Cdc42,CDKN1A,CREB1,CTNNB1,EGFR,EIF4E,FGF10,HIF1A,HRAS,IGF1R,MAPK1,MTOR,NCOA3,NFkB (complex),NFKB1,P38 MAPK,PTEN,RB1,RELA,SP1,STAT5a/b,STAT6,TP53,TSC2	AHCY,ATP1A1,ATP5F1C,ATP6AP1,AVIL,CCT3,CCT5,CD9,CDC42,CNN3,COX6B1,CTSZ,CYCS,DBI,DPP7,ERP29,FKBP4,FUBP1,GNB1,GSK3A,GSTO1,HINT1,HNRNPD,HNRNPH1,HNRNPH3,HNRNPM,HSPA5,HUWE1,KHSRP,LTB4R,MAPRE2,MIF,MPPE1,MT-CO2,NAP1L4,NUCKS1,NUDC,P4HB,PABPC1,PDIA6,PGP,PLIN3,PPIA,PPIB,PSMA2,PSMD2,PXN,RAB43,RAB8A,RBM3,RBMX,RPL7,S100A9,SEC23A,SH3KBP1,SLC16A3,STK4,SYNCRIP,SYTL1,TAGLN2,TES,THBS1,TMOD3,TUBB1,UBE2I,USO1,VWF	67 (29)	28	CSNK2A1,PKM	budesonide
danusertib	chemical drug		3			1.386	8.88e-12	0.0078	ABL1,Akt,AKT1,APP,AURKA,AURKB,BIRC5,BRCA1,CASP8,CDKN1B,CTNNB1,cytarabine,danusertib,ERK1/2,ESR1,GPX1,JAK2,MAPK8,MAPK9,MTOR,MYBBP1A,MYC,NFAT5,NFkB (complex),P38 MAPK,PI3K (complex),PIK3R1,PKM,SDCBP,SNCA,SRC (family),STAT3,TP53,TP63,TP73	ATP1A1,ATP5F1C,ATP5PO,B2M,CCT3,CD55,CD9,CDC42,COX6B1,CYCS,DBI,DSC1,FABP3,FCER1G,FKBP4,GLRX,GLRX5,GNB1,GSK3A,HNRNPA2B1,HNRNPD,HNRNPH1,HNRNPM,HSPE1,ILK,ITGA2B,KHSRP,LASP1,LTB4R,MAPRE2,MIF,MPPE1,NAP1L4,P4HB,PDIA6,PEBP1,PGLS,PGP,PLIN3,PPIA,PPIB,PRKAR2B,PSMD2,PXN,RAB5B,RAB8A,RBM3,RNASEL,RPL7,S100A9,SAMD9,SET,SLC44A2,STK4,SYNE2,TES,TMOD3,UBE2I,UQCRC1,USO1,VWF,WIPF1,ZYX	63 (35)	30					ABL1,AURKA
ARAP3	other	1.579	3			0.412	9.86e-12	0.0025	AKT1,ARAP3,ARF6,Cdc42,CHUK,COL18A1,ECT2,EGFR,HIF1A,HRAS,IGF1R,IRF3,IRS2,ITGB1,MRTFA,MTOR,NFKB1,PI3K (complex),PIK3R1,PPARG,RELA,RHOA,ROCK2,SRF,STAT5a/b,SYK,TP53,YAP1	ACTB,AHCY,ALDOC,ATP1A1,ATP5F1C,AVIL,CCT5,CDC42,CNN3,CTSZ,DBI,DSC1,FABP3,FKBP4,FUBP1,GNB1,GSK3A,HNRNPD,HNRNPH1,HNRNPM,HSPD1,HSPE1,HUWE1,ILK,KHSRP,LASP1,LTB4R,MAPRE2,MMP25,NAP1L4,NUCKS1,NUDC,P4HB,PABPC1,PCYT1A,PDIA6,PGP,PPIA,PPIB,PSMD2,RAB8A,RBM3,RCSD1,RPL7,SH3KBP1,STK4,SYTL1,TAGLN2,THBS1,TMOD3,TUBB1,USO1,VWF	53 (28)	26				RHOA
KAT5	transcription regulator		2	Inhibited		-2.263	1.02e-11	0.0047	KAT5,MAPK8,MAPK9,MYC,RELA,TP53,TP63	ACTB,ATP1A1,ATP5F1C,B2M,CCT3,CDC42,CNN3,COX6B1,CYCS,DBI,FABP5,FKBP4,GLRX5,GSK3A,HNRNPA2B1,HNRNPD,HNRNPH1,HSP90B1,HSPA5,HSPE1,ILK,ITGA2B,KHSRP,LASP1,LTB4R,MAPRE2,MIF,MT-CO2,NAP1L4,NUDT21,P4HB,PDIA6,PPIA,PSMD2,PSMD6,PXN,RAB8A,RBM3,RELA,RPL7,SH3KBP1,SLC16A3,STK4,SYTL1,TES,THBS1,UBE2I,UQCRC1,USO1,ZYX	50 (7)	7	Cyclin B,MAPK12	bisphenol A,metribolone,S-equol,vorinostat		APEX1,ATR,CHEK2,PRL,TP53
3-nitrobenzanthrone	chemical toxicant		3			0.849	1.04e-11	0.0031	2-amino-1-methyl-6-phenylimidazo-4-5-b-pyridine,3-nitrobenzanthrone,Akt,AR,aristolochic acid I,CYP1A1,CYP1A2,ERK1/2,NFkB (complex),NFKBIZ,NQO1,P38 MAPK,PARP1,PDK1,Pkc(s),RELA,tanespimycin,TP53	AHCY,ATP1A1,ATP5F1C,ATP6AP1,B2M,CCT3,CCT5,CD55,CNN3,COX6B1,CYCS,DBI,DNAJB1,FKBP4,FUBP1,GSK3A,HNRNPA2B1,HNRNPC,HNRNPM,HSPD1,HSPE1,ILK,ITGA2B,LASP1,LTB4R,MAPRE2,MPPE1,MT-CO2,NAP1L4,OLR1,P4HB,PDIA6,PSMA2,PSMD2,RAB8A,RBM3,RBMX,RPL7,S100A9,SH3KBP1,SLC16A3,SLC44A2,STK4,SYTL1,TAGLN2,TMOD3,UQCRC1,USO1,WIPF1,ZYX	50 (18)	14				CYP1A2
OXSI-2	chemical drug		3			-1.753	1.12e-11	0.0022	AKT1,AR,CBL,CDH1,CDK2,CTNNB1,EGFR,EIF2AK3,ERBB2,FLT1,IGF1R,IKZF1,IKZF3,IL17RA,JAK2,MAPK8,MTOR,MYD88,NFkB (complex),NFKBIA,OXSI-2,P38 MAPK,PIK3R1,REL,RELA,RET,STAT5a/b,SYK,TGFB1	ACTB,AHCY,ATP1A1,ATP5PO,ATP6AP1,AVIL,CBFB,CCT3,CCT5,CNN3,CORO1C,COX6B1,DNM3,EIF4H,FCER1G,FKBP2,FUBP1,GSK3A,HINT1,HNRNPA2B1,HNRNPC,HNRNPD,HNRNPH1,HNRNPM,HSPD1,HSPE1,ILK,MIF,MINPP1,MPDU1,MYL12A,NAPA,NUDC,PABPC1,PCYT1A,PDE4D,PGP,PPIA,PPIB,PRKAR2B,RCSD1,RELA,RNASEL,S100A9,SET,SH3KBP1,SLC16A3,SRI,STK4,SYTL1,TAGLN2,TMOD3,TUBB1,UQCRC1,ZYX	55 (29)	27					CBL
Top2	group		3			-1.697	1.21e-11	0.0026	ATF2,BIRC5,CDK2,CHEK2,DDIT3,E2F1,E2F3,EGFR,EIF4E,FOS,KAT5,MAPK12,MDM4,MYOD1,NFE2L2,PKM,RB1,Top2,TP53	ACTB,AHCY,APOE,ATP5F1C,AVIL,CCT3,CCT5,CNN3,COX6B1,CTSZ,CYCS,DBI,EIF3I,ERP29,FABP5,FKBP4,FUBP1,GSK3A,GSTO1,HNRNPA2B1,HNRNPH1,HSPD1,HSPE1,ITGA2B,LASP1,LTB4R,MAPRE2,NAP1L4,NUCKS1,NUDC,OLR1,P4HB,PABPC1,PCYT1A,PGLS,PPIA,PPIB,PRKAR2B,PSMA2,PSMD6,RAB8A,RBM3,RPL7,S100A9,SEC23A,TAGLN2,TUBB1,UQCRC1,VWF,ZYX	50 (19)	16	JUN	apigenin,curcumin,FN1,idarubicin,mitoxantrone,tirapazamine,TP53			CHEK2,MAPK12
UBE2D1	enzyme		2			1.234	1.24e-11	0.0012	BRCA1,IREB2,NFKBIA,RELA,SMAD4,TP53,UBE2D1,VHL	AHCY,APOE,ATP1A1,ATP5F1C,B2M,CBFB,CNN3,CTSZ,CYCS,DBI,FABP5,FKBP4,FUBP1,GSK3A,HNRNPA2B1,HNRNPD,HSP90B1,HSPA5,HSPD1,ILK,ITGA2B,LASP1,LTB4R,MAPRE2,MPDU1,MT-CO2,NAP1L4,OLR1,P4HB,PDIA6,PSMD2,PXN,RAB8A,RBM3,RPL7,SH3KBP1,STK4,SYTL1,TAGLN2,UQCRC1,USO1,ZYX	42 (8)	7		actinomycin D,cadmium			PSMC3,PSMD4
arsenic trioxide	chemical drug		2	Inhibited		-3.328	1.26e-11	0.0081	Akt,Ap1,arsenic trioxide,ATF4,CASP8,CCND1,EGFR,ERK,HSF1,MAP2K1,MAPK1,MAPK8,MAPK9,NFE2L2,NFkB (complex),NFKBIA,Notch,P38 MAPK,PARP1,Pkc(s),RB1,RXRA,STAT3,TP73	ACTB,APOE,ATP1A1,B2M,CCT5,CD55,CD9,CDC42,CNN3,COX6B1,CTSZ,DNAJB1,ERP29,FABP5,FCER1G,FKBP4,GLRX,GSTO1,HNRNPD,HNRNPH1,HSP90B1,HSPA5,HSPD1,HSPE1,ITGA2B,LASP1,LTB4R,MAPRE2,MIF,MPDU1,MPPE1,NAPA,NUDC,OLR1,P4HB,PABPC1,PCYT1A,PDIA6,PPIA,PPIB,PXN,RELA,S100A9,SEC23A,SLC16A3,SYNE2,TMOD3,TUBB1,UBE2I,UQCRC1,USO1,WIPF1	52 (24)	24				BACH1,CHEK2,EGFR,EIF2AK3,FN1,HIF1A,HSF1,NQO1,PDIA6,reactive oxygen species,RHOA,TADA3,TP53,TXNRD1,XBP1	BCR-ABL1,Cyclin A,DNMT3A,HK2,PTPN11,RPS6KB1,SREBF1,SREBF2,thymidine kinase
NEUROG1	transcription regulator		3			1.192	1.27e-11	0.0114	Akt,AKT1,Cdc42,CHUK,ECT2,HRAS,MAPK1,MAPK8,NEUROG1,NFATC1,NFkB (complex),NFKB1,PI3K (complex),PLD2,PPARG,PRKCA,PRKCB,RELA,RHOA,ROCK2,SRF,STAT,STAT3,STAT4,STAT5a/b,STAT5B,STAT6,Tgf beta,TP53	ACOT1,AHCY,ALDOC,ATP1A1,ATP5F1C,ATP5PO,CD55,CD9,CDC42,CNN3,CTSZ,CYCS,DBI,DSC1,ERP29,FABP3,FKBP4,FUBP1,GNB1,GSK3A,HNRNPH3,HNRNPM,HSP90B1,HSPD1,ILK,KHSRP,LASP1,LTB4R,MAPRE2,MIF,MMRN1,MPPE1,NAP1L4,P4HB,PCYT1A,PDIA6,PGP,PLIN3,PRKAR2B,PSMD2,PXN,RAB8A,RBM3,RPL7,SH3KBP1,SLC16A3,STK4,SYTL1,TAGLN2,TES,THBS1,TMOD3,TUBB1,UBE2I,UQCRC1,USO1,VWF	57 (29)	28		APP,SOX2-OCT4-NANOG		LGR5	FN1,RHOA
NFATC3	transcription regulator		3	Inhibited		-2.689	1.33e-11	0.0134	Akt,AR,CDK2,CSF2,E2F1,FOS,GATA1,Hif1,HIF1A,JUN,Nfat (family),NFAT5,NFATC3,P38 MAPK,Pkc(s),RB1,SP1,SPI1,TCF3,TGFB1,TP53	AHCY,ALDOC,APOE,ATP1A1,ATP5F1C,ATP5PO,ATP6AP1,CCT3,CCT5,CD55,CD9,CORO1C,CYCS,DBI,EIF3I,EIF4H,FABP3,FABP5,FCER1G,FKBP2,FUBP1,GSK3A,HINT1,HNRNPA2B1,HNRNPC,HNRNPH1,HSPD1,HSPE1,HUWE1,LASP1,LTB4R,MAPRE2,MPPE1,MYL12A,NAP1L4,NUCKS1,NUDC,OLR1,PCYT1A,PDE4D,PDIA6,PLEK,PPIA,PRKAR2B,PSMA2,PSMD2,PXN,RAB8A,RBM3,RPL7,S100A9,SF1,SLC16A3,SRI,TAGLN2,THBS1,TMOD3,TUBB1,USO1,WIPF1,ZYX	61 (21)	19	DNMT3A,DNMT3B,EDN1,reactive oxygen species	Jnk dimer,levodopa		CGA,DDIT4	IL4
HIF1A	transcription regulator		2			0	1.35e-11	0.0122	Akt,CDK2,CDKN1A,EIF4EBP1,HIF1A,IL1B,JUN,NFKB1,Nos,PPARG,PTEN,RELA,Smad2/3,STAT3,TP53,VEGFA	AHCY,ALDOC,APOE,ATP1A1,ATP5F1C,ATP5PO,CBFB,CD55,CNN3,COX6B1,CYCS,FABP3,FCER1G,FKBP4,FUBP1,GSK3A,GSTO1,HSPA5,HSPD1,HUWE1,ILK,ITGA2B,KHSRP,LASP1,LTB4R,MAPRE2,MIF,MPPE1,NAP1L4,NUCKS1,OLR1,P4HB,PCYT1A,PDIA6,PPIA,PRKAR2B,PSMD2,PXN,RAB43,RAB8A,RBM3,RELA,RPL7,S100A9,SEC23A,SET,SH3KBP1,SLC16A3,STK4,SYNCRIP,SYTL1,THBS1,UQCRC1,USO1,WIPF1,ZYX	56 (16)	16	5-hydroxytryptamine,ADORA2A,ANGPT2,APEX1,APP,ARRB2,arsenic,arsenic trioxide,BCR-ABL1,CD3,CEBPD,CHCHD4,cobalt,COPS5,CSNK2A1,EGFR,ESR1,F2,HIF1A-AS1,HSF2,ID1,IgG,IL5,Insulin,LCN2,LINC01139,mitoxantrone,MLXIPL,MTOR,NEU3,PARK7,PI3K (family),PINK1,Presenilin,reactive oxygen species,RICTOR,Stat3-Stat3,TCR,TGM2,TRPM7,UQCC3,USP29,YY1,Z-LLL-CHO	10-(6'-ubiquinonyl)decyltriphenylphosphonium,4-phenylbutyric acid,actinomycin D,AHR,anisomycin,apigenin,ARG2,ascorbic acid,bortezomib,budesonide,cadmium,caffeine,celecoxib,curcumin,cyclosporin A,DCN,dichloroacetic acid,dithiothreitol,geldanamycin,GnRH analog,HBA1/HBA2,HEXIM1,IDH2,mir-10,mir-34,mir-515,N-acetyl-L-cysteine,NSC 644221,ouabain,plicamycin,PTTG1,Rbx1,salinosporamide A,silibinin,SIRT7,S…		ACAN,AURKA,BIRC5,CA9,Collagen type IV,DDIT4,FLT1,FN1,FURIN,FYN,HK2,HUWE1,IFI16,IL4,ITGA2B,ITGAV,LGALS1,NDRG1,NEK8,NT5E,PLCG1,SMAD7,TNFSF10,WT1	BACH2,E2F3,NCR2,NDUFA11,NFKB1,NRF1,TFAM
PPP2R2B	phosphatase		3			1.565	1.35e-11	0.0244	AR,ATF4,BAK1,BAX,CCND1,CCNE1,CDK4/6,CDKN1A,CREB1,CTNNB1,E2F1,F2,FURIN,GCK,GLI1,MYC,NANOG,NFKBIA,Notch,Pka,POU5F1,PPP2R2B,PTEN,RB1,SMAD3,SNAI1,SOX2,SP1,STAT3,TGFB1,TP73,VIM	ACTB,AHCY,ALDOC,ATP5F1C,ATP5PO,ATP6AP1,CBFB,CCT3,CCT5,CORO1C,COX6B1,CTSZ,CYCS,DBI,EIF3I,EIF4H,FABP5,FCER1G,FKBP2,FKBP4,FUBP1,GLRX5,GSTO1,HINT1,HNRNPA2B1,HNRNPC,HNRNPD,HNRNPH1,HSPD1,HSPE1,HUWE1,ILK,LTB4R,MAPRE2,MIF,MPDU1,MYL12A,NAPA,NUDC,NUDT21,OLR1,PCYT1A,PDE4D,PDIA6,PEBP1,PLIN3,PPIA,PSMD2,RAB43,RAB8B,RBM3,RBMX,RNASEL,RPL7,SEC23A,SEPTIN2,SET,SLC16A3,SRI,SYNCRIP,SYNE2,TAGLN2,TES,TMOD3,TUBB1,UBE2I,…	69 (32)	29					CCNE1,FURIN
salinosporamide A	chemical drug		3			-0.372	1.41e-11	0.0188	AHR,Akt,ATF2,ATF4,CASP3,CASP8,CCND1,CEBPA,CSF2,cytokine,DICER1,EIF2A,HIF1A,HNF4A,IKBKB,IL18,IL1B,IL6,IRF3,IRF4,JUN,MAPK8,NFkB (complex),NFKB1,NFKBIA,NOS2,PARP1,PPARG,PRKN,PTEN,REL,RELA,salinosporamide A,SP1,STAT1,STAT4,TP53	ACOT1,ACTB,APOE,ATP5F1C,ATP5PO,B2M,CD55,CYCS,DNAJB1,FABP3,FABP5,FCER1G,FKBP4,FUBP1,GLRX,GSK3A,HINT1,HNRNPA2B1,HNRNPH1,HSPD1,HUWE1,ILK,KHSRP,MAPRE2,MIF,MINPP1,MMP25,MMRN1,MPDU1,MPPE1,NAP1L4,NAPA,NUCKS1,OLR1,PEBP1,PGP,PLEK,PLIN3,PPIA,PPIB,PRKAR2B,PSMA2,PSMD2,PXN,RAB43,RAB8A,RBM3,RELA,RPL7,S100A9,SEC23A,SET,SF1,SH3KBP1,SLC16A3,STK4,SYNCRIP,SYTL1,TAGLN2,TMOD3,TUBB1,UBE2I,UQCRC1,USO1,VWF	65 (37)	35				EIF2A	BIRC5,HIF1A,YY1
bisindolylmaleimide III	chemical - kinase inhibitor		3	Activated		2	1.43e-11	0.007	ADRB2,Akt,AKT1,bisindolylmaleimide III,CDK2,CEBPB,CHUK,CLOCK,Creb,CREB1,EGFR,EIF4E,FLNA,HIF1A,HMGA1,HSF1,IKBKB,IRF3,JAK2,JUN,MAP3K7,MAPK1,MAPK8,MTOR,NFkB (complex),NFKB1,NFKBIA,P38 MAPK,PARP1,PPARA,PRKCA,PRKG1,RAF1,RARA,RELA,RGS2,RICTOR,RPS6KA5,RPS6KB1,SFPQ,TEAD1,TP53,TP73,TSC2	ALDOC,ATP6AP1,AVIL,CBFB,CCT3,CD55,CNN3,CTSZ,CYCS,DBI,DNAJB1,DPP7,ERP29,FABP3,FKBP4,FUBP1,GSK3A,HINT1,HNRNPA2B1,HNRNPH1,HNRNPM,HSPE1,HUWE1,ILK,KHSRP,LTB4R,MIF,MPDU1,MPPE1,NAP1L4,NUCKS1,NUDC,NUDT21,P4HB,PABPC1,PCYT1A,PDIA6,PGLS,PGP,PLIN3,PPIB,PSMA2,PSMC6,PSMD2,PSMD6,PXN,RAB1B,RAB8A,RBM3,RBMX,RNASEL,S100A9,SAMD9,SEC23A,SEPTIN2,SET,SF1,STK4,SYNE2,SYTL1,TMOD3,U2AF1/U2AF1L5,UBE2I,USO1	64 (44)	41					PRKCA,RPS6KB1
inavolisib	chemical drug		3	Activated		2.213	1.48e-11	0.0088	Akt,AKT1,CCAR2,Creb,EIF4EBP1,HMGA1,inavolisib,IRF3,MTOR,MYC,NFkB (complex),NFKB1,NFKBIA,P38 MAPK,PDK1,PI3K (complex),PI3K (family),PIK3CA,PLCG2,PPARGC1A,REL,RELA,RHOA,SP1,SREBF1,SREBF2,STAT3,SYK,TP53	ACTB,AHCY,ALDOC,APOE,ATP5F1C,ATP5PO,AVIL,CCT3,CD55,CD9,CNN3,COX6B1,CTSZ,CYCS,FABP3,FKBP4,FUBP1,GLRX5,GSK3A,HINT1,HNRNPA2B1,HNRNPD,HNRNPH1,HNRNPM,HSPA5,HSPD1,HSPE1,ILK,KHSRP,MAPRE2,MINPP1,MPDU1,MPPE1,NAP1L4,NUDT21,P4HB,PCYT1A,PDIA6,PGP,PLIN3,PPIA,PPIB,PRKAR2B,PSMD2,PXN,RAB8A,RBM3,RCSD1,SEPTIN2,SH3KBP1,SLC44A2,STK4,TAGLN2,TES,THBS1,UBE2I,UQCRC1,USO1,WIPF1	59 (29)	27					PI3K (family)
HTRA2	peptidase		3			1.021	1.48e-11	0.0027	Akt,AKT1,BIRC2,BIRC6,CASP3,CASP6,CASP7,CASP8,CASP9,caspase,CDK2,Ciap,DICER1,ERK1/2,HTRA2,IL18,JUN,MAP3K7,NFKBIA,P38 MAPK,PAK2,PARP1,PRKN,RB1,RELA,Smad2/3,STAT1,STAT3,TGFBR1,TP53,XIAP	ACTB,AHCY,ATP1A1,ATP5F1C,B2M,CBFB,CD55,CD9,COX6B1,CYCS,DBI,FCER1G,FKBP4,FUBP1,HNRNPA2B1,HNRNPH1,HNRNPM,HSP90B1,HSPD1,ITGA2B,LASP1,LTB4R,MAPRE2,MPDU1,MPPE1,NAP1L4,P4HB,PCYT1A,PPIA,PSMD2,RAB8A,RBM3,RELA,RNASEL,RPL7,S100A9,SET,SH3KBP1,STK4,SYTL1,TAGLN2,THBS1,TMOD3,TUBB1,USO1,WIPF1,ZYX	47 (31)	23	APOC3,carfilzomib,Immunoglobulin,PSEN1	bortezomib,ESR1
YAF2	transcription regulator		3			0.25	1.5e-11	0.0165	Akt,CCND1,CDK4/6,CDKN1A,CREB1,CTNNB1,F2,GCK,GLI1,MYC,MYCN,NFKBIA,Pka,PTEN,RELA,SP1,STAT3,TP53,TP73,YAF2	AHCY,APOE,ATP5F1C,ATP5PO,B2M,CCT3,CD9,CDC42,CORO1C,COX6B1,CTSZ,CYCS,DBI,ERP29,FABP5,FCER1G,FKBP4,FUBP1,GLRX5,GSK3A,GSTO1,HINT1,HNRNPA2B1,HNRNPD,HNRNPH1,HSPE1,HUWE1,ILK,LASP1,MAPRE2,MIF,MPDU1,MPPE1,MYL12A,NAP1L4,NUDT21,OLR1,P4HB,PDE4D,PLIN3,PPIA,PSMD2,PXN,RAB43,RAB8A,RAB8B,RBM3,RBMX,RNASEL,SEC23A,SH3KBP1,SLC16A3,STK4,SYNCRIP,SYNE2,SYTL1,TAGLN2,TES,TUBB1,UBE2I,USO1,VWF,WIPF1,ZYX	64 (20)	19
COPS5	transcription regulator	1.081	2			-0.42	1.6e-11	0.0089	Akt,CDK2,COPS5,Hif1,HIF1A,Jnk,JUN,MAPK8,MAPK9,NFkB (complex),NFKB1,RELA,SMAD4,STAT1,STAT3,TP53	AHCY,ALDOC,APRT,ATP1A1,ATP5F1C,ATP5PO,B2M,CBFB,CD9,CNN3,CYCS,DBI,FCER1G,FKBP4,FUBP1,GSK3A,HNRNPA2B1,HNRNPD,HSPA5,HSPD1,HUWE1,ILK,ITGA2B,KHSRP,LASP1,LTB4R,MAPRE2,MIF,MPPE1,NAP1L4,NUCKS1,P4HB,PCYT1A,PDIA6,PPIA,PRKAR2B,PSMD2,PXN,RAB8A,RBM3,RPL7,SH3KBP1,SLC16A3,STK4,SYNCRIP,SYTL1,TAGLN2,TNPO2,USO1,WIPF1,ZYX	51 (16)	16	1,2-dithiol-3-thione,ammonium,APP	curcumin,FSH		AMD1,BUB1,CD247,DDIT4,F2R,FBXO5,HIF1A,JUN,MELK,NEK2,NFKB1,SDCBP,TTK,WRN	BIRC5,CCNE1,CDC20,GPX4,reactive oxygen species,SLC7A5,TP53,TRAF4,TXNIP
hydroxypropyl-beta-cyclodextrin	chemical drug		3	Activated		2.722	1.6e-11	0.0111	Akt,AKT1,CXCR4,EGFR,ERK1/2,G protein alpha,G protein alphai,HIF1A,hydroxypropyl-beta-cyclodextrin,JAK2,MAPK1,P38 MAPK,PI3K (complex),PPIA,PTEN,STAT3,TP53,VHL,ZAP70	ACTB,AHCY,ALDOC,APOE,ATP1A1,ATP5F1C,ATP5PO,B2M,CCT5,CD9,CNN3,DBI,ERP29,FABP5,FCER1G,FKBP4,FUBP1,GSK3A,HNRNPA2B1,HNRNPD,HNRNPH1,HNRNPM,HSPE1,HUWE1,ILK,LASP1,LTB4R,MAPRE2,MIF,MPPE1,NAP1L4,NUCKS1,NUDC,P4HB,PABPC1,PDIA6,PPIA,PSMD2,PXN,RAB43,RAB8A,RBM3,RELA,RPL7,SEC23A,SET,SLC16A3,SYNCRIP,TAGLN2,UBE2I,UQCRC1,USO1,VPS4B,ZYX	54 (19)	19				APOD,NCEH1	cholesterol,CXCL14,CXCR4,pregnenolone,SREBF2
PKN3	kinase		3			-1.1	1.69e-11	0.0229	AHR,Akt,ATF2,CCND1,CEBPA,CSF2,CXCL12,cytokine,HIF1A,HNF4A,IL1B,IL6,IRF3,IRF4,JUN,MAPK1,MAPK8,MMP14,NFkB (complex),NFKB1,NFKBIA,NOS2,P38 MAPK,PKN3,PPARG,REL,RELA,STAT3,STAT4,TGFB1,TP53	ACOT1,ACTB,APOE,ATP5F1C,ATP5PO,CBFB,CCT5,CNN3,CORO1C,CYCS,DNAJB1,EIF4H,ERP29,FABP3,FABP5,FKBP2,FKBP4,FUBP1,GLRX,GSK3A,HNRNPA2B1,HNRNPC,HNRNPD,HNRNPH1,HUWE1,KHSRP,MAPRE2,MIF,MINPP1,MMP25,MMRN1,MPDU1,MPPE1,MYL12A,NAP1L4,NUCKS1,OLR1,PDE4D,PDIA6,PGP,PLEK,PLIN3,PPIA,PPIB,PRKAR2B,PSMA2,PSMD2,PXN,RAB8A,RBM3,RELA,RPL7,S100A9,SEPTIN7,SF1,SH3KBP1,SLC16A3,SRI,STK4,SYTL1,TAGLN2,TMOD3,TUBB1,UQCRC1,USO1,VWF,WI…	67 (31)	29
ATP5F1E	transporter		3	Inhibited		-2.286	1.81e-11	0.0053	ADCY,ADRB2,Akt,AKT1,ATP5F1E,CDK2,CHUK,CLOCK,Creb,CREB1,cyclic AMP,EGFR,EIF4E,HMGA1,HSF1,IKBKB,JAK2,JUN,MAP3K7,MAPK1,MAPK8,NFkB (complex),NFKBIA,P38 MAPK,PARP1,Pka,PPARA,PRKCA,PRKG1,RAF1,RARA,RB1,RGS2,SFPQ,STAT3,STAT5a/b,STK11,TEAD1,TP53,TP73,TRPM8	ATP5F1C,AVIL,CBFB,CCT3,CD55,CDC42,CNN3,COX6B1,CTSZ,CYCS,DBI,DNAJB1,ERP29,FABP3,FABP5,FKBP4,FUBP1,GSK3A,HINT1,HNRNPA2B1,HNRNPH1,HNRNPM,HSPE1,ILK,ITGA2B,LTB4R,MIF,MPDU1,MPPE1,NAP1L4,NUDC,P4HB,PABPC1,PCYT1A,PDE4D,PDIA6,PGLS,PLIN3,PPIA,PPIB,PSMD2,RAB1B,RAB8A,RBM3,RBMX,RNASEL,RPL7,S100A9,SAMD9,SEC23A,SEPTIN2,SET,SF1,SYNE2,TAGLN2,TMOD3,TUBB1,U2AF1/U2AF1L5,UBE2I,USO1,VWF,WIPF1	62 (41)	40	metribolone			PRKCA
TGM2	enzyme	1.647	2			-0.674	1.83e-11	0.015	Akt,Creb,CTNNB1,EGFR,ERK1/2,HIF1A,MTOR,NFkB (complex),NFKB1,PI3K (family),PRKCA,RB1,RELA,STAT3,Tgf beta,TGM2,TP53	AHCY,ALDOC,ATP1B3,ATP5F1C,ATP5PO,AVIL,CCT5,CD55,CD9,CNN3,COX6B1,CYCS,DBI,FCER1G,FKBP4,FUBP1,GSK3A,HNRNPA2B1,HNRNPD,HNRNPH1,HSPA5,HSPD1,HSPE1,HUWE1,ILK,KHSRP,LASP1,LTB4R,MAPRE2,MIF,MPPE1,NAP1L4,NUCKS1,NUDC,P4HB,PABPC1,PDIA6,PGP,PLIN3,PPIA,PPIB,PSMD2,PXN,RAB8A,RBM3,RPL7,S100A9,SH3KBP1,SLC16A3,SYTL1,TAGLN2,THBS1,USO1,WIPF1,ZYX	55 (17)	17	5-azacytidine,BHLHE40,bisphenol A,CD 437,CD3,D-glucose,EDN1,ESR1,F2R,IL13,IL4,PKM,thapsigargin	DNMT3A,mir-122,N-acetyl-L-cysteine		BCL6,C5AR1,cholesterol,FFAR3,HIF1A,ID1,MTOR,NFKB1,Pik3r,PRKCA,reactive oxygen species,SDCBP,SELP,VIP,ZEB1
STK11	kinase		2			1.172	1.88e-11	0.01	Akt,AKT1,ATF2,EGFR,ERBB2,ESR1,IGF1R,INSR,MTOR,P38 MAPK,RELA,RET,SMAD4,SMARCA4,STK11,TP53,YAP1	ACTB,AHCY,ALDOC,ATP5F1C,ATP5PO,AVIL,B2M,CBFB,CCT5,CD55,CDC42,CNN3,COX6B1,CYCS,DBI,DSC1,FKBP4,FUBP1,GNB1,GSK3A,GSTO1,HNRNPA2B1,HNRNPH1,HNRNPM,HSPE1,ILK,ITGA2B,LASP1,LTB4R,MAPRE2,MIF,MMP25,MPPE1,NAP1L4,NUDC,OLR1,PABPC1,PDIA6,PGLS,PGP,PPIA,PPIB,PRKAR2B,PSMD2,PXN,RAB5B,RAB8A,RBM3,RPL7,SAMD9,SH3KBP1,SLC16A3,SLC44A2,SYTL1,TMOD3,UBE2I,UQCRC1,USO1,WIPF1	59 (17)	17	EIF2AK3,F2,I-BOP,SERPIND1,simvastatin,taurocholic acid	4-hydroxynonenal,4-oxo-2-nonenal,geldanamycin,Insulin,monorden		ARF5,ESR1,NDUFA11,NT5E,PKM,PTPN11,RHOA,TNFSF10,TXNRD1	EGFR,FN1,HIF1A,ID1,L-methionine,MTOR,reactive oxygen species
2prime-3prime RR-S2 cyclic di-AMP	chemical reagent		3			-0.42	1.89e-11	0.0075	2prime-3prime RR-S2 cyclic di-AMP,Akt,AKT1,ATF2,EIF4EBP1,IFNA2,IFNB1,IRF3,JUN,MTOR,NFkB (complex),NFKB1,P38 MAPK,PEBP1,REL,RELA,STAT1,STAT3,STING1,TBK1,TP53,YAP1	ACTB,AHCY,ATP1A1,ATP5F1C,AVIL,B2M,CD55,CD9,CNN3,CYCS,DBI,FCER1G,FKBP4,FUBP1,GSK3A,HNRNPA2B1,HNRNPM,HSPD1,KHSRP,LASP1,LTB4R,MAPRE2,MIF,MINPP1,MMP25,MPPE1,MT-CO2,NAP1L4,P4HB,PDIA6,PGP,PPIB,PRKAR2B,PSMD2,PXN,RAB8A,RBM3,RELA,RNASEL,RPL7,SAMD9,SH3KBP1,SLC16A3,STK4,SYTL1,TAGLN2,THBS1,UQCRC1,USO1,WIPF1,ZYX	51 (22)	21				TBK1
9-nitrooleic acid	chemical - endogenous mammalian		3			0.42	1.89e-11	0.0075	9-nitrooleic acid,Akt,AKT1,ATF2,EIF4EBP1,IFNA2,IFNB1,IRF3,JUN,MTOR,NFkB (complex),NFKB1,P38 MAPK,PEBP1,REL,RELA,STAT1,STAT3,STING1,TBK1,TP53,YAP1	ACTB,AHCY,ATP1A1,ATP5F1C,AVIL,B2M,CD55,CD9,CNN3,CYCS,DBI,FCER1G,FKBP4,FUBP1,GSK3A,HNRNPA2B1,HNRNPM,HSPD1,KHSRP,LASP1,LTB4R,MAPRE2,MIF,MINPP1,MMP25,MPPE1,MT-CO2,NAP1L4,P4HB,PDIA6,PGP,PPIB,PRKAR2B,PSMD2,PXN,RAB8A,RBM3,RELA,RNASEL,RPL7,SAMD9,SH3KBP1,SLC16A3,STK4,SYTL1,TAGLN2,THBS1,UQCRC1,USO1,WIPF1,ZYX	51 (22)	21					TBK1
CXA-10	chemical drug		3			0.42	1.89e-11	0.0075	Akt,AKT1,ATF2,CXA-10,EIF4EBP1,IFNA2,IFNB1,IRF3,JUN,MTOR,NFkB (complex),NFKB1,P38 MAPK,PEBP1,REL,RELA,STAT1,STAT3,STING1,TBK1,TP53,YAP1	ACTB,AHCY,ATP1A1,ATP5F1C,AVIL,B2M,CD55,CD9,CNN3,CYCS,DBI,FCER1G,FKBP4,FUBP1,GSK3A,HNRNPA2B1,HNRNPM,HSPD1,KHSRP,LASP1,LTB4R,MAPRE2,MIF,MINPP1,MMP25,MPPE1,MT-CO2,NAP1L4,P4HB,PDIA6,PGP,PPIB,PRKAR2B,PSMD2,PXN,RAB8A,RBM3,RELA,RNASEL,RPL7,SAMD9,SH3KBP1,SLC16A3,STK4,SYTL1,TAGLN2,THBS1,UQCRC1,USO1,WIPF1,ZYX	51 (22)	21					TBK1
nitro-conjugated linoleic acid	chemical - endogenous mammalian		3			0.42	1.89e-11	0.0075	Akt,AKT1,ATF2,EIF4EBP1,IFNA2,IFNB1,IRF3,JUN,MTOR,NFkB (complex),NFKB1,nitro-conjugated linoleic acid,P38 MAPK,PEBP1,REL,RELA,STAT1,STAT3,STING1,TBK1,TP53,YAP1	ACTB,AHCY,ATP1A1,ATP5F1C,AVIL,B2M,CD55,CD9,CNN3,CYCS,DBI,FCER1G,FKBP4,FUBP1,GSK3A,HNRNPA2B1,HNRNPM,HSPD1,KHSRP,LASP1,LTB4R,MAPRE2,MIF,MINPP1,MMP25,MPPE1,MT-CO2,NAP1L4,P4HB,PDIA6,PGP,PPIB,PRKAR2B,PSMD2,PXN,RAB8A,RBM3,RELA,RNASEL,RPL7,SAMD9,SH3KBP1,SLC16A3,STK4,SYTL1,TAGLN2,THBS1,UQCRC1,USO1,WIPF1,ZYX	51 (22)	21					TBK1
LILRA2	other		3	Activated		2.722	1.96e-11	0.0044	AKT1,AR,CBL,CD247,EGFR,EIF2AK3,ERBB2,ERK1/2,FLT1,IGF1R,IL17RA,JAK2,LILRA2,MAPK1,MAPK8,MTOR,NFkB (complex),P38 MAPK,RET,STAT5a/b,SYK,TGFB1,TLR3,TYRO3,YAP1,ZAP70	ACTB,AHCY,ATP5PO,ATP6AP1,AVIL,B2M,CBFB,CCT3,CCT5,CNN3,CORO1C,COX6B1,EIF4H,ERP29,FKBP2,FUBP1,GLRX3,GSK3A,HINT1,HNRNPA2B1,HNRNPC,HNRNPD,HNRNPH1,HNRNPM,HSP90B1,HSPD1,HSPE1,ILK,MIF,MMP25,MYL12A,NAPA,NUDC,OLR1,PABPC1,PDE4D,PGP,PPIA,PPIB,RBM3,RCSD1,RNASEL,S100A9,SET,SLC16A3,SRI,TAGLN2,TMOD3,TUBB1,UBE2I,UQCRC1,VPS4B,VWF,ZYX	54 (26)	23				CBL
geldanamycin	chemical drug		2			-0.267	1.98e-11	0.0133	AKT1,BCL2L1,CTNNB1,ERBB2,geldanamycin,HSF1,IKBKB,JUN,MAPK1,MAPK8,NFkB (complex),NOS1,P38 MAPK,RELA,STAT3,STK11,TP53,TRAP1	ALDOC,ARHGAP10,ATP1A1,ATP5F1C,ATP5PO,AVIL,CCT3,CCT5,CD55,CD9,CDC42,CNN3,COX6B1,CTSZ,CYCS,DBI,DNAJB1,ERP29,FABP5,FKBP4,FUBP1,GSK3A,HNRNPM,HSP90B1,HSPA5,HSPD1,HSPE1,ILK,LASP1,LTB4R,MAPRE2,MIF,MPPE1,MT-CO2,NAP1L4,NUDC,OLR1,P4HB,PDIA6,PLIN3,PSMD2,RAB1B,RAB8A,RAB8B,RBM3,RELA,RNASEL,RPL7,SH3KBP1,SLC16A3,STK4,SYTL1,TAGLN2,UBE2I,USO1,ZYX	56 (18)	18				AURKA,BIRC5,DNAJB1,FAT1,HSF1,HSP90B1,IGF2R,NFKB1,PARK7,PSMC3,RAB1B,RAB2A,reactive oxygen species,SDCBP	ARRB2,CEBPD,CELF2,CHEK1,CIITA,EGFR,FYN,GBP1,HIF1A,IFI16,JUN,MLH1,MTOR,PLK1,SPN,STK11,TP53
JUN	transcription regulator		2	Activated		2.474	2.01e-11	0.0151	Akt,AR,CDK2,E2F1,FOS,GATA1,Hif1,HIF1A,JUN,P38 MAPK,Pkc(s),RB1,SP1,SPI1,TCF3,TGFB1,TP53	AHCY,ALDOC,APOE,ATP1A1,ATP5F1C,ATP5PO,ATP6AP1,CCT3,CCT5,CD55,CD9,CORO1C,CYCS,DBI,EIF3I,EIF4H,FABP5,FCER1G,FKBP2,FUBP1,GSK3A,HINT1,HNRNPA2B1,HNRNPC,HNRNPH1,HSPD1,HSPE1,HUWE1,LASP1,LTB4R,MAPRE2,MPPE1,MYL12A,NAP1L4,NUCKS1,NUDC,OLR1,PCYT1A,PDE4D,PDIA6,PLEK,PPIA,PRKAR2B,PSMA2,PSMD2,PXN,RAB8A,RBM3,RPL7,S100A9,SLC16A3,SRI,TAGLN2,THBS1,TMOD3,TUBB1,USO1,WIPF1,ZYX	59 (17)	17	4-hydroxynonenal,5-fluorouracil,7-ketocholesterol,AHR,andrographolide,ANGPT2,anisomycin,ARHGEF25,arsenite,ATE1,ATF1,ATR,BACH2,bortezomib,BTK,cadmium,CD 437,CD28,CD3,clioquinol,Cop9 Signalosome,COPS5,crocidolite asbestos,D-glucose,DDX5,dimethyl fumarate,dimethyl sulfoxide,ECT2,EIF2AK3,ERBB4,ERN1,F2,FAT1,FSH,growth factor,IL13,IL4,INSIG1,Insulin,Integrin,IPMK,Jnk dimer,LCAT,MAPK12,methylprednisolon…	(+)-catechin,actinomycin D,apigenin,ascorbic acid,BANF1,BATF,budesonide,capsaicin,curcumin,cyanocobalamin,CYBB,cyclosporin A,dasatinib,dithiothreitol,DNMT3A,ESR1,fisetin,geldanamycin,HSF2,IDH2,miR-30c-5p (and other miRNAs w/seed GUAAACA),N-acetyl-L-cysteine,PHF6,PLCG1,PRKCA,PTPRR,RAB1B,riboflavin,selenomethylselenocysteine,tanespimycin,V-PYRRO/NO,ZMYND10		ABL1,APEX1,Atf,BIRC5,CGA,Cyclin A,FN1,HEY1,HK2,IBSP,IFI16,LGR5,PRNP,TF,thymidine kinase,Top2	AKT3,APOC3,CD247,cholesterol,IGF2R,ITGAV
Flt3 dimer	complex		3	Activated		2.661	2.02e-11	0.0007	AKT1,AR,CBL,CD247,EGFR,EIF2AK3,FLT1,FLT3,Flt3 dimer,GRB2,HRAS,IDH2,IGF1R,IL17RA,ITGA5,JAK2,MAPK8,MTOR,P38 MAPK,PTEN,RET,SYK,TGFB1,ZAP70	AHCY,ATP5PO,ATP6AP1,AVIL,CBFB,CCT3,CCT5,CNN3,CORO1C,COX6B1,EIF4H,FKBP2,FUBP1,GNB1,GSK3A,HINT1,HNRNPC,HNRNPD,HNRNPH1,HNRNPM,HSP90B1,HSPD1,HSPE1,ILK,MIF,MYL12A,NAPA,NUDC,P4HB,PABPC1,PCYT1A,PDE4D,PEBP1,PGP,PPIB,PXN,RAB43,RBM3,RCSD1,RNASEL,S100A9,SEC23A,SET,SLC16A3,SRI,SYNCRIP,TAGLN2,TMOD3,UQCRC1,VPS4B,ZYX	51 (24)	20				CBL
YY1	transcription regulator		2			1.474	2.08e-11	0.0026	CDKN1B,MYC,TP53,YY1	ACTB,APOE,ATP1A1,ATP5F1C,B2M,CCT3,CNN3,COX6B1,CYCS,DBI,FABP5,FKBP4,FUBP1,GLRX5,GSK3A,HNRNPA2B1,HNRNPD,HNRNPH1,HSPA5,HSPE1,ILK,ITGA2B,LASP1,LTB4R,MAPRE2,MIF,MT-CO2,NAP1L4,NUDT21,OLR1,P4HB,PDIA6,PPIA,PSMD2,RAB8A,RBM3,RELA,RPL7,S100A9,SLC16A3,TES,THBS1,UBE2I,UQCRC1,USO1,ZYX	46 (4)	4	CD3,PLK1	manganese chloride,salinosporamide A		DDIT4,EDN1,EGFR,GBP1,HIF1A,IL4,SMAD7	Ap2,CIITA,HEY1,TP53
FKBP1A	enzyme	-3.892	2			1.234	2.11e-11	0.0014	EGFR,ERK,FKBP1A,MTOR,TP53	ACTB,AHCY,APOE,ATP1A1,ATP5F1C,AVIL,CCT5,CNN3,CYCS,DBI,FKBP4,FUBP1,GSK3A,HNRNPA2B1,HNRNPD,HNRNPH1,HSPA5,HSPD1,HSPE1,ILK,LASP1,LTB4R,MAPRE2,MT-CO2,NAP1L4,NUDC,P4HB,PABPC1,PDIA6,PGP,PPIB,PRKAR2B,PSMD2,RAB8A,RBM3,RPL7,SLC16A3,TAGLN2,THBS1,UQCRC1,USO1,ZYX	42 (5)	4	GnRH analog,IL13,mibolerone	5-fluorouracil,aldosterone,mir-122,temsirolimus			EGFR,MTOR,MTORC1
MHC	complex		3	Inhibited		-2.216	2.12e-11	0.019	Akt,AKT1,B2M,Ca2+,CD247,CD3,Creb,CREB1,CRTC2,ERK,FAS,FOS,GAB2,HLA-DQA1,HRAS,HSF1,IFNG,IKBKB,IL2,ITPR,JUN,JUNB,KRAS,MAP3K7,MAP4K3,MAPK1,MAPK8,MAPK9,Mek,MHC,MTOR,NFkB (complex),NFKB1,NFKBIA,NR4A1,P38 MAPK,PAK2,PI3K (complex),PRKCA,PRKCB,RB1,REL,RELA,SREBF1,SRF,STAT4,STAT5a/b,STAT5B,STAT6,STIM1,SYK,TCR,ZAP70	ACOT1,AHCY,ATP5F1C,AVIL,CCT3,CCT5,CDC42,COX6B1,CYCS,DBI,DNAJB1,ERP29,FABP3,FABP5,FKBP2,FKBP4,GNB1,GSTO1,HINT1,HNRNPH3,HNRNPM,HSP90B1,HSPA5,HSPD1,HUWE1,ILK,ITGA2B,KHSRP,LASP1,LTB4R,MIF,MINPP1,MMP25,MPDU1,MPPE1,MYL12A,P4HB,PCYT1A,PDE4D,PEBP1,PGP,PLEK,PLIN3,PPIA,PPIB,PRKAR2B,PSMA2,PSMC6,PXN,RBM3,RBMX,RCSD1,RELA,RNASEL,RPL7,SAMD9,SLC16A3,STK4,SYNCRIP,SYTL1,TAGLN2,TES,TMOD3,TUBB1,UQCRC1,VPS4B	66 (53)	49				TCR
BLM	enzyme		3			-0.302	2.2e-11	0.001	BLM,HSF1,PARP,PARP1,PRKCB,PRKCE,RAD51,RPA1,STAT3,TERF2,TOP1,TP53,wortmannin,WRN	AHCY,APOE,ATP1A1,ATP5F1C,B2M,CCT3,CCT5,CD55,CD9,CNN3,CYCS,DBI,DNAJB1,FABP5,FCER1G,FKBP4,FUBP1,GSK3A,HNRNPA2B1,HSPA5,HSPD1,ILK,ITGA2B,LASP1,LTB4R,MAPRE2,MIF,MT-CO2,NAP1L4,P4HB,PDIA6,PSMD2,PXN,RAB8A,RBM3,RELA,RPL7,TAGLN2,THBS1,TMOD3,UQCRC1,USO1,WIPF1,ZYX	44 (14)	8	ATR,BCR-ABL1,TERF2,TOPBP1,TTK	TP53			WRN
N-(6,6-dimethyl-5-((1-methylpiperidin-4-yl)carbonyl)-1,4,5,6-tetrahydropyrrolo(3,4-c)pyrazol-3-yl)-3-methylbutanamide	chemical drug		3	Activated		2	2.21e-11	0.0149	26s Proteasome,Akt,APP,Ca2+,Cdc42,CDKN1A,COPS5,Creb,CTNNB1,EIF2AK3,FOS,HIF1A,IGF1R,IKBKB,INSR,JAK2,JUN,MAPK1,MAPT,MTOR,N-(6,6-dimethyl-5-((1-methylpiperidin-4-yl)carbonyl)-1,4,5,6-tetrahydropyrrolo(3,4-c)pyrazol-3-yl)-3-methylbutanamide,NFkB (complex),NFKBIA,PARP1,PI3K (complex),Pka,PTEN,RAF1,RB1,RELA,SREBF2,STAT3,SYK,TLR2,TLR4,TP53,TP73,TSC2	ACTB,AHCY,APOE,APRT,ATP5F1C,AVIL,CD9,CDC42,CNN3,COX6B1,CTSZ,DPP7,ERP29,FKBP4,FUBP1,GSK3A,GSTO1,HNRNPA2B1,HNRNPD,HSPA5,HSPD1,HUWE1,ILK,LASP1,LTB4R,MPDU1,MPPE1,NAP1L4,NAPA,NUCKS1,OLR1,P4HB,PCYT1A,PDE4D,PDIA6,PEBP1,PGP,PLEK,PLIN3,PPIA,PPIB,PSMA2,PSMD6,PXN,RAB43,RAB8A,RBM3,RCSD1,RELA,RNASEL,RPL7,SEC23A,SET,SH3KBP1,STK4,SYNCRIP,SYNE2,SYTL1,TAGLN2,TMOD3,TNPO2,UBE2I,VWF,ZYX	64 (38)	36					APP
KDM4A	transcription regulator		3			0.42	2.25e-11	0.0084	Akt,AKT1,ATF2,EIF4EBP1,IFNA2,IFNB1,IRF3,JUN,KDM4A,MTOR,NFkB (complex),NFKB1,P38 MAPK,PEBP1,REL,RELA,STAT1,STAT3,STING1,TBK1,TP53,YAP1	ACTB,AHCY,ATP1A1,ATP5F1C,AVIL,B2M,CD55,CD9,CNN3,CYCS,DBI,FCER1G,FKBP4,FUBP1,GSK3A,HNRNPA2B1,HNRNPM,HSPD1,KHSRP,LASP1,LTB4R,MAPRE2,MIF,MINPP1,MMP25,MPPE1,MT-CO2,NAP1L4,P4HB,PDIA6,PGP,PPIB,PRKAR2B,PSMD2,PXN,RAB8A,RBM3,RELA,RNASEL,RPL7,SAMD9,SH3KBP1,SLC16A3,STK4,SYTL1,TAGLN2,THBS1,UQCRC1,USO1,WIPF1,ZYX	51 (22)	21	ACKR3,CXCR4				TBK1
DCN	other		2			0	2.25e-11	0.0045	AKT1,CCN2,DCN,EGFR,ERBB2,IGF1R,MAPK1,MTOR,STAT1,Tgf beta,TGFB1	ALDOC,APOE,ATP5PO,AVIL,B2M,CBFB,CD55,CD9,CDC42,CNN3,CORO1C,CYCS,EIF4H,ERP29,FCER1G,FKBP2,FUBP1,HINT1,HNRNPA2B1,HNRNPC,HNRNPD,HNRNPM,HSPE1,ILK,ITGA2B,LASP1,MIF,MPPE1,MT-CO2,MYL12A,NUDC,PABPC1,PDE4D,PGP,PPIA,PPIB,PRKAR2B,PXN,RBM3,SLC16A3,SRI,THBS1,TMOD3,UBE2I,UQCRC1,USO1,WIPF1,ZYX	48 (11)	11	D-glucose,PRL,Z-LLL-CHO	AHR,C5AR1,SMAD7		Cyclin A,ERBB4,MTOR,reactive oxygen species,TP53	HIF1A,ITGAV
MAD2L	group		3			0.48	2.27e-11	0.0007	BCL2L1,CDC20,CDH1,CDKN1A,Cyclin A,E2F1,MAD2L,MAD2L1,MAD2L2,MAP2K1/2,RASSF1,TP53	ACTB,AHCY,ATP1A1,ATP5F1C,CD9,CNN3,CYCS,DBI,EIF3I,FABP5,FKBP4,FUBP1,GSK3A,GSTO1,HSP90B1,HSPA5,HSPD1,HSPE1,ILK,ITGA2B,LASP1,LTB4R,MAPRE2,MT-CO2,NAP1L4,NUDC,P4HB,PCYT1A,PDIA6,PSMD2,RAB8A,RBM3,RELA,RPL7,TAGLN2,TUBB1,UQCRC1,USO1,ZYX	39 (12)	8					CDC20
BANP	other		2			-1.121	2.39e-11	0.0006	BANP,CDH1,RELA,TP53	ACTB,AHCY,APOE,ATP1A1,ATP5F1C,B2M,CNN3,DBI,FABP5,FKBP4,FUBP1,GSK3A,HSP90B1,HSPA5,HSPD1,ILK,ITGA2B,LASP1,LTB4R,MAPRE2,MT-CO2,NAP1L4,OLR1,P4HB,PDIA6,PSMD2,PXN,RAB8A,RBM3,RELA,RPL7,SH3KBP1,STK4,SYTL1,TAGLN2,THBS1,UQCRC1,USO1,ZYX	39 (4)	3	curcumin,Firre				TP53
CXCR4	G-protein coupled receptor		2	Inhibited		-2.885	2.41e-11	0.011	Akt,AKT1,CXCR4,EGFR,ERK1/2,G protein alpha,G protein alphai,HIF1A,JAK2,MAPK1,P38 MAPK,PI3K (complex),PPIA,PTEN,STAT3,TP53,VHL,ZAP70	ACTB,AHCY,ALDOC,ATP1A1,ATP5F1C,ATP5PO,B2M,CCT5,CD9,CNN3,DBI,ERP29,FABP5,FCER1G,FKBP4,FUBP1,GSK3A,HNRNPA2B1,HNRNPD,HNRNPH1,HNRNPM,HSPE1,HUWE1,ILK,LASP1,LTB4R,MAPRE2,MIF,MPPE1,NAP1L4,NUCKS1,NUDC,P4HB,PABPC1,PDIA6,PPIA,PSMD2,PXN,RAB43,RAB8A,RBM3,RELA,RPL7,SEC23A,SET,SLC16A3,SYNCRIP,TAGLN2,UBE2I,UQCRC1,USO1,VPS4B,ZYX	53 (18)	18	BACH1,BTK,CD28,CD3,CEBPD,D-glucose,DNMT3A,EDN1,ERG,IL4,Immunoglobulin,metribolone,mycophenolic acid,PI3K (family),reactive oxygen species,SELP,tributyrin,trichosanthin,TRIM28,TRIM29	APP,BCR-ABL1,bortezomib,cholesterol,curcumin,cyclosporin A,F2,hydroxypropyl-beta-cyclodextrin,IL13,IL5,indican,INSIG1,lactacystin,N-acetyl-L-cysteine,NQO1,TCR,vandetanib		ID1,KDM4A,RHOA,TNFSF10,TP53
cyanocobalamin	chemical - endogenous mammalian		3	Activated		2	2.46e-11	0.0159	26s Proteasome,Akt,APP,Ca2+,Cdc42,CDKN1A,COPS5,Creb,CTNNB1,cyanocobalamin,EIF2AK3,FOS,HIF1A,IGF1R,IKBKB,INSR,JAK2,JUN,MAPK1,MAPT,MTOR,NFkB (complex),NFKBIA,PARP1,PI3K (complex),Pka,PTEN,RAF1,RB1,RELA,SREBF2,STAT3,SYK,TLR2,TLR4,TP53,TP73,TSC2	ACTB,AHCY,APOE,APRT,ATP5F1C,AVIL,CD9,CDC42,CNN3,COX6B1,CTSZ,DPP7,ERP29,FKBP4,FUBP1,GSK3A,GSTO1,HNRNPA2B1,HNRNPD,HSPA5,HSPD1,HUWE1,ILK,LASP1,LTB4R,MPDU1,MPPE1,NAP1L4,NAPA,NUCKS1,OLR1,P4HB,PCYT1A,PDE4D,PDIA6,PEBP1,PGP,PLEK,PLIN3,PPIA,PPIB,PSMA2,PSMD6,PXN,RAB43,RAB8A,RBM3,RCSD1,RELA,RNASEL,RPL7,SEC23A,SET,SH3KBP1,STK4,SYNCRIP,SYNE2,SYTL1,TAGLN2,TMOD3,TNPO2,UBE2I,VWF,ZYX	64 (38)	36				EGFR	APP,JUN,PRNP,PSEN1
N6-cyclopentyladenosine	chemical reagent		3			-0.603	2.48e-11	0.0028	ADCY,ADORA1,ADORA2A,Akt,Alp,Ca2+,cyclic AMP,EGFR,MAPK1,N6-cyclopentyladenosine,NFkB (complex),NFKB1,P38 MAPK,Pka,Pkc(s),PLC,PLCG1,PLCG2,PRKCA,PRKCE,PRL,RELA,SLC9A1,STAT5a/b,STK11,TRPM8	ACTB,AHCY,ALDOC,ATP5F1C,ATP6AP1,AVIL,CCT5,CD55,CD9,CDC42,CNN3,COX6B1,ERP29,FABP5,HNRNPA2B1,HNRNPD,HNRNPH1,HSP90B1,HSPD1,HSPE1,ITGA2B,KHSRP,MIF,MPPE1,NAPA,NUDC,PABPC1,PDE4D,PEBP1,PPIA,PRKAR2B,PXN,RBM3,S100A9,SAMD9,SH3KBP1,SLC16A3,SYTL1,TUBB1,UBE2I,UQCRC1,VWF,WIPF1,ZYX	44 (26)	21				ADORA1	RGS2
2'3'-cyclic guanosine monophosphate-adenosine monophosphate	chemical - endogenous mammalian		3			0.14	2.49e-11	0.0058	2'3'-cyclic guanosine monophosphate-adenosine monophosphate,Akt,AKT1,ATF2,CDK2,EIF4EBP1,Ifn,IFNA2,IFNB1,IRF3,MAPK1,MTOR,NFKB1,P38 MAPK,PEBP1,REL,RELA,SMAD3,STAT1,STAT3,STAT5a/b,STING1,TBK1,TP53,YAP1	ACTB,AHCY,ATP1A1,ATP5F1C,AVIL,B2M,CD55,CD9,CNN3,DBI,ERP29,FCER1G,FKBP4,FUBP1,GSK3A,HNRNPM,HSPD1,KHSRP,LASP1,LTB4R,MAPRE2,MIF,MINPP1,MMP25,MPPE1,MT-CO2,NAP1L4,P4HB,PCYT1A,PDIA6,PGP,PPIB,PRKAR2B,PSMD2,RAB8A,RBM3,RELA,RNASEL,RPL7,SAMD9,SH3KBP1,STK4,SYTL1,TAGLN2,THBS1,TUBB1,UBE2I,UQCRC1,USO1,VWF,ZYX	51 (25)	24		GSTK1		TBK1
stanozolol	chemical drug		3			-1.016	2.56e-11	0.0108	Akt,AKT1,AR,CCNE1,Creb,CREB1,CREBBP,EGFR,EP300,ERBB2,ERK1/2,ESR1,HIF1A,IKBKB,MAPK1,MAPK7,NCOA2,P38 MAPK,Pka,Pkc(s),RELA,SMAD3,Sod,SREBF2,stanozolol,STUB1,TP53	ACOT1,ACTB,AHCY,ALDOC,ATP5F1C,ATP5PO,ATP6AP1,B2M,CCT3,CCT5,CD55,CD9,CNN3,COX6B1,CTSZ,DBI,DNM3,DSC1,ERP29,FABP5,FKBP4,FUBP1,GNB1,GSTO1,HNRNPA2B1,HNRNPH1,HNRNPM,HSPA5,HSPD1,HSPE1,HUWE1,LASP1,MAPRE2,MPPE1,MT-CO2,NAP1L4,NUCKS1,NUDC,P4HB,PABPC1,PCYT1A,PDE4D,PDIA6,PGLS,PLIN3,PPIA,PRKAR2B,PSMD2,RAB5B,RAB8A,RBM3,RBMX,RPL7,SAMD9,SLC44A2,SYTL1,THBS1,TMOD3,UQCRC1,USO1,WIPF1,ZYX	62 (27)	25
CBL	transcription regulator	1.195	2	Activated		2.722	2.63e-11	0.0054	Akt,AKT1,AR,CBL,CD247,EGFR,EIF2AK3,ERBB2,ERK1/2,FLT1,IGF1R,IL17RA,ITGA5,JAK2,MAPK1,MAPK8,MTOR,RET,STAT5a/b,SYK,TGFB1,ZAP70	ACTB,AHCY,ATP5PO,ATP6AP1,AVIL,B2M,CBFB,CCT3,CCT5,CD55,CNN3,CORO1C,COX6B1,EIF4H,ERP29,FKBP2,FUBP1,GSK3A,HINT1,HNRNPA2B1,HNRNPC,HNRNPD,HNRNPH1,HNRNPM,HSP90B1,HSPD1,HSPE1,ILK,MIF,MPPE1,MYL12A,NAPA,NUDC,PABPC1,PDE4D,PGP,PPIA,PPIB,PXN,RBM3,RCSD1,RNASEL,S100A9,SET,SLC16A3,SRI,TAGLN2,TMOD3,TUBB1,UBE2I,UQCRC1,VPS4B,VWF,ZYX	54 (22)	21	CD28,CD3,EPHA3,Flt3 dimer,Immunoglobulin,Insulin,lactacystin,LILRA2,PRL,rosiglitazone,Z-LLL-CHO	D-glucose,dasatinib,ESR1,OXSI-2,TNFSF10		BTK,MTOR,PTPN11	EIF2AK3,FLT1,PLCG1,SLC52A1
ARHGEF18	other		3			1.021	2.69e-11	0.0017	ARHGEF18,Cdc42,CHUK,ECT2,HRAS,JAK2,MAP2,MRTFA,MYC,NFKB1,P38 MAPK,PI3K (complex),PLCG1,PPARG,PRKCA,Rac,RELA,RHOA,STAT5a/b,TP53,ZAP70	ALDOC,ATP1A1,ATP5F1C,ATP5PO,CCT3,CD55,CDC42,CNN3,COX6B1,CTSZ,DBI,FABP3,FKBP4,FUBP1,GLRX5,GNB1,GSK3A,HNRNPD,HNRNPH1,HSPD1,HSPE1,ILK,KHSRP,LASP1,LTB4R,MAPRE2,NAP1L4,NUDT21,P4HB,PCYT1A,PDIA6,PLIN3,PPIA,PRKAR2B,PSMD2,RAB8A,RBM3,RPL7,SET,SH3KBP1,STK4,SYTL1,TES,UQCRC1,USO1,VPS4B,VWF	47 (21)	19		miR-1-3p (and other miRNAs w/seed GGAAUGU)		RHOA
L-N6-(1-iminoethyl)-lysine	chemical reagent		3	Activated		2.782	2.71e-11	0.0133	26s Proteasome,BAX,CASP3,CD247,CDK2,CHUK,DICER1,doxorubicin,EGFR,EIF4EBP1,ERK,HIF1A,IKBKB,IKBKE,IKBKG,IKK (complex),IL18,INSR,IREB2,IRS2,L-N6-(1-iminoethyl)-lysine,mitomycin C,MTOR,MYC,NFkB (complex),NFKB1,NFKBIA,NFKBIB,Nos,NOS2,NOS3,PARP1,PRKG1,PRKN,PTEN,RELA,STAT3,STAT4,TLR3,ZAP70	ACTB,AHCY,ALDOC,ATP1A1,AVIL,CCT3,CCT5,CD9,CDC42,CNN3,COX6B1,CTSZ,CYCS,DBI,FUBP1,GLRX3,GLRX5,GSK3A,HINT1,HNRNPD,HNRNPH1,HSPD1,HSPE1,HUWE1,ILK,ITGA2B,KHSRP,MPDU1,NUCKS1,NUDC,NUDT21,OLR1,P4HB,PABPC1,PCYT1A,PDIA6,PGP,PPIA,PPIB,PSMD2,PSMD6,PXN,RAB43,RBM3,RELA,RPL7,SEC23A,SET,SH3KBP1,SLC16A3,STK4,SYNCRIP,SYTL1,TAGLN2,TMOD3,VPS4B,WIPF1	57 (40)	36
UBQLN1	other	-1.834	3	Activated		2.216	2.72e-11	0.0191	26s Proteasome,Akt,APP,BAX,Ca2+,CASP3,CD247,Cdc42,CDKN1A,CHUK,COPS5,Creb,DICER1,EIF2AK3,FOS,HIF1A,IGF1R,IKBKB,IL18,INSR,IRF3,JUN,MAPK1,MTOR,NFkB (complex),NFKB1,NFKBIA,ORAI1,PI3K (complex),Pka,PTEN,RAF1,RB1,REL,RELA,STAT3,SYK,TLR2,TLR3,TLR4,TP53,TP73,TSC2,UBQLN1	ACTB,AHCY,APOE,APRT,ATP5F1C,AVIL,CD9,CDC42,CNN3,COX6B1,CTSZ,DPP7,ERP29,FKBP4,GLRX3,GSK3A,GSTO1,HNRNPA2B1,HNRNPD,HNRNPH1,HSPA5,HSPD1,HUWE1,ILK,KHSRP,LASP1,LTB4R,MINPP1,MPDU1,MPPE1,NAP1L4,NAPA,NUCKS1,OLR1,P4HB,PDE4D,PDIA6,PEBP1,PGP,PLEK,PLIN3,PPIA,PPIB,PSMA2,PSMD6,PXN,RAB43,RAB8A,RBM3,RCSD1,RELA,RNASEL,RPL7,SEC23A,SET,SH3KBP1,STK4,SYNCRIP,SYNE2,SYTL1,TAGLN2,TNPO2,UBE2I,VPS4B,VWF,ZYX	66 (44)	41				PSEN1	APP,reactive oxygen species
PI3K (family)	group		2	Inhibited		-2.364	2.79e-11	0.0137	Akt,AKT1,CCAR2,Creb,HMGA1,IRF3,MYC,NFKB1,NFKBIA,P38 MAPK,PI3K (family),PIK3R1,PLCG2,PPARGC1A,REL,RELA,RHOA,SP1,SREBF1,SREBF2,STAT3,SYK,TP53	ACTB,AHCY,ALDOC,APOE,ATP5F1C,ATP5PO,CCT3,CD55,CD9,CNN3,COX6B1,CTSZ,CYCS,FABP3,FKBP4,FUBP1,GLRX5,GSK3A,HINT1,HNRNPA2B1,HNRNPD,HNRNPH1,HNRNPM,HSP90B1,HSPA5,HSPD1,HSPE1,ILK,KHSRP,LASP1,MAPRE2,MINPP1,MPDU1,MPPE1,NAP1L4,NUDT21,P4HB,PCYT1A,PDIA6,PLIN3,PPIA,PRKAR2B,PSMD2,PXN,RAB8A,RBM3,RCSD1,SEPTIN2,SH3KBP1,SLC16A3,STK4,TAGLN2,TES,THBS1,UBE2I,UQCRC1,USO1,WIPF1	58 (23)	23	5-fluorouracil,ANGPT2,D-glucose,EGFR,Immunoglobulin,Insulin,L-methionine,OXT,SDCBP	apitolisib,curcumin,fidarestat,inavolisib,mir-10,N-acetyl-L-cysteine,panulisib,pexidartinib,rigosertib,samotolisib,VS-5584,WXFL10030390		BIRC5,CXCR4,DDIT4,ESR1,HIF1A,NQO1,PKM,reactive oxygen species,RHOA,RPS6KB1,SREBF1,SREBF2,TNFSF10	NFKB1,TP53,TXNIP
ACTL6A	other	-2.066	3			-0.593	3.21e-11	0.0414	ACTL6A,AR,ATF4,BAK1,BAX,CCND1,CDK4/6,CREB1,CTNNB1,E2F1,ERK,ESR1,F2,GLI1,MYC,NFKBIA,Pka,PTEN,RELA,SMARCA4,SP1,STAT3,TP53,TP73	ACTB,AHCY,ATP5PO,ATP6AP1,CCT3,CDC42,CORO1C,COX6B1,CTSZ,CYCS,DBI,DSC1,EIF3I,ERP29,FABP5,FCER1G,FUBP1,GLRX5,GNB1,GSK3A,GSTO1,HINT1,HNRNPA2B1,HNRNPD,HNRNPH1,HSPD1,HSPE1,HUWE1,ILK,ITGA2B,LTB4R,MIF,MPDU1,NAP1L4,NAPA,NUDC,NUDT21,OLR1,P4HB,PDE4D,PDIA6,PGLS,PLIN3,PPIA,PSMD2,PXN,RAB43,RAB5B,RAB8A,RAB8B,RBM3,RBMX,RNASEL,RPL7,SAMD9,SEC23A,SH3KBP1,SLC16A3,SLC44A2,SYNCRIP,SYNE2,SYTL1,TAGLN2,TES,TMOD3,TUBB1,UB…	71 (24)	23	LCN2			CCNB1
ID1	transcription regulator		2			-0.7	3.27e-11	0.0112	Akt,AKT1,BIRC5,CDK2,EGFR,ERK1/2,HIF1A,ID1,NANOG,NFkB (complex),POU5F1,RAF1,RB1,TCF3,TFAP2A,TP53	AHCY,ALDOC,ATP1A1,ATP5F1C,ATP5PO,B2M,CCT5,CNN3,COX6B1,DBI,FKBP4,FUBP1,GSK3A,HNRNPA2B1,HNRNPD,HNRNPM,HSPD1,HSPE1,HUWE1,ILK,ITGA2B,LASP1,LTB4R,MAPRE2,MIF,MPPE1,MT-CO2,NAP1L4,NUCKS1,NUDC,NUDT21,OLR1,P4HB,PABPC1,PCYT1A,PDIA6,PPIA,PRKAR2B,PSMD2,PXN,RAB8A,RBM3,S100A9,SET,SLC16A3,TAGLN2,THBS1,TUBB1,USO1,VWF,ZYX	51 (16)	16	APP,BCR-ABL1,CXCR4,D-glucose,ESR1,iron dextran,plicamycin,PRL,RNF125,temozolomide,TGM2	BHLHE40,FSH,PRKCA,STK11		BIRC5,FN1,HIF1A	CDC20,IFI16,TF,ZNF148
mir-10	microRNA		2			-1.206	3.29e-11	0.0037	Akt,EGFR,ERK1/2,mir-10,STAT3,TP53	ACTB,AHCY,APOE,ATP1A1,ATP5F1C,B2M,CCT5,CD9,CNN3,DBI,FABP5,FCER1G,FKBP4,FUBP1,GSK3A,HNRNPA2B1,HNRNPD,HNRNPH1,HSP90B1,HSPA5,HSPD1,HSPE1,ILK,ITGA2B,LASP1,LTB4R,MAPRE2,MPPE1,NAP1L4,NUDC,P4HB,PABPC1,PDIA6,PPIA,PSMD2,RAB8A,RBM3,RPL7,TAGLN2,THBS1,UQCRC1,USO1,WIPF1,ZYX	44 (6)	5	4-hydroxynonenal,APP,budesonide,capecitabine,E2F3,LATS2	5-fluorouracil,docetaxel,FSH,Insulin,metribolone,PAX3-FOXO1,vorinostat		EGFR,NFAT (complex),SYVN1	EDEM1,FURIN,HIF1A,HOXA1,MTOR,PI3K (family),RPS6KB1,SGPL1,SMG1,TBC1D1,WT1
SFLLRN (PAR1-activator)	chemical reagent		1			0	3.31e-11	0.0001	SFLLRN (PAR1-activator)	ACTB,CD55,ERP29,HSPA5,HSPD1,ILK,PEBP1,TAGLN2	8 (1)	1				F2R,FLT1,ITGA2B,RGS18,SELP	RHOA
sincalide	biologic drug		3			1.291	3.33e-11	0.0251	26s Proteasome,Akt,AR,CEBPA,CTNNB1,E2F1,ERK1/2,FOS,FOXO3,HIPK2,ITGB3,JAK2,mir-21,MYC,NFKB1,NFKB2,NFKBIA,Nos,P38 MAPK,PI3K (complex),PKM,PRKAA2,RELA,RHOA,sincalide,SOD2,STAT1,STAT3,STAT5a/b,TP63,TSC2,YAP1	ACTB,AHCY,ATP1A1,ATP5PO,ATP6AP1,AVIL,B2M,CCT3,CD55,CD9,CDC42,CNN3,DBI,DPP7,EIF3I,FABP5,FCER1G,FKBP4,GLRX,GLRX5,HNRNPD,HNRNPH1,HSPA5,HSPD1,ILK,KHSRP,LASP1,MMP25,MMRN1,MPDU1,MPPE1,MT-CO2,NUCKS1,NUDC,NUDT21,OLR1,P4HB,PGLS,PPIA,PRKAR2B,PSMA2,PSMD2,PSMD6,PXN,RELA,RPL7,SEPTIN2,SET,SH3KBP1,SLC16A3,STK4,SYTL1,TAGLN2,TES,TUBB1,UBE2I,UQCRC1,VWF,WIPF1,ZYX	60 (32)	31
CELF2	other	-2.97	3			-1.905	3.4e-11	0.0083	Akt,AKT1,BAX,BIRC5,BRCA1,CASP3,CASP8,CASP9,CDK2,CDKN1A,CELF2,CHEK1,CHEK2,cytarabine,DICER1,E2F1,E2F3,EGFR,IL18,MDM4,NFkB (complex),P38 MAPK,PARP1,PKM,PTEN,RASSF1,RB1,RELA,STAT3,TP53	AHCY,APOE,ATP5F1C,CCT5,CD55,CNN3,COX6B1,DBI,EIF3I,FABP5,FCER1G,FKBP4,GSK3A,GSTO1,HNRNPA2B1,HNRNPD,HNRNPH1,HNRNPM,HSP90B1,HSPD1,ITGA2B,LASP1,LTB4R,MAPRE2,MIF,MPPE1,NAP1L4,NUCKS1,P4HB,PABPC1,PCYT1A,PDIA6,PGLS,PPIA,PXN,RAB43,RAB8A,RBM3,RPL7,S100A9,SEC23A,SET,SH3KBP1,SLC16A3,STK4,SYNCRIP,SYTL1,TAGLN2,TMOD3,UQCRC1,USO1,VWF,WIPF1,ZYX	54 (30)	25	ASPSCR1-TFE3	geldanamycin,PLX5622		CHEK1,CHEK2,TP53
idarubicin	chemical drug		3			-1.969	3.51e-11	0.0189	26s Proteasome,BAX,beta-estradiol,Cdc42,Creb,EGFR,EIF2AK3,ERN1,ESR1,fulvestrant,HMGA1,idarubicin,IREB2,MAPK1,MYC,NCOA1,NCOA2,NR3C1,P38 MAPK,p70 S6k,PDX1,Pka,PLA2G6,RELA,STAT3,tamoxifen,TP53	ACOT1,ATP1A1,ATP5F1C,ATP6AP1,CCT3,CCT5,CD55,CD9,CDC42,CNN3,COX6B1,CTSZ,CYCS,DBI,DSC1,ERP29,FABP3,FKBP4,FUBP1,GLRX5,GNB1,GSK3A,GSTO1,HNRNPA2B1,HNRNPD,HNRNPH1,HSPE1,LASP1,LTB4R,MAPRE2,MMRN1,NAP1L4,NAPA,NT5DC2,NUDC,NUDT21,P4HB,PABPC1,PDE4D,PDIA6,PGLS,PLIN3,PPIA,PPIB,PSMD2,PSMD6,RAB11FIP1,RAB5B,RAB8A,RBM3,RELA,RNASEL,RPL7,SAMD9,SEPTIN2,SET,SH3KBP1,SLC44A2,SYTL1,TBCB,TES,TMOD3,U2AF1/U2AF1L5,UBE2I,UQCR…	66 (27)	25				GBP1,TP53	Top2
4-hydroxynonenal	chemical toxicant		2			-1.722	3.55e-11	0.0191	4-hydroxynonenal,Akt,AKT1,ERN1,Hsp90,IL6,MAP2K3,MAPK1,NFE2L2,NFkB (complex),NFKBIA,NOS2,P38 MAPK,PI3K (complex),PPARG,SIRT1,STK11,TGFB1,TNF	AHCY,ATP5F1C,ATP5PO,AVIL,CBFB,CCT3,CCT5,CDC42,CNN3,CORO1C,COX6B1,CYCS,DBI,DNAJB1,EIF4H,ERP29,FABP3,FCER1G,FKBP2,FUBP1,GLRX,HINT1,HNRNPC,HNRNPH1,HNRNPM,HSPD1,ILK,ITGA2B,LASP1,LTB4R,MIF,MPDU1,MPPE1,MT-CO2,MYL12A,P4HB,PCYT1A,PDE4D,PDIA6,PLEK,PLIN3,PPIB,PRKAR2B,PSMA2,RBM3,S100A9,SAMD9,SEC23A,SLC16A3,SRI,STK4,SYTL1,TBCB,TMOD3,UBE2I,UQCRC1,WIPF1	57 (19)	18	aldosterone	APOA1		ATR,CHEK1,ERN1,HSPA1A/HSPA1B,JUN,mir-10	CCNB1,miR-378a-3p (and other miRNAs w/seed CUGGACU),STK11,thiol
USP5	peptidase	-1.589	3			-0.492	3.66e-11	0.0354	Akt,AKT1,AR,CCNE1,CDK2,Creb,CREB1,CTNNB1,EGFR,ERBB2,ESR1,FOXM1,HIF1A,MAP3K7,MAPK1,MAPK7,METTL3,NCOA2,NFkB (complex),NR4A1,Pka,RELA,SREBF2,STAT5a/b,STUB1,TP53,UBC,USP5	ACOT1,ACTB,AHCY,ALDOC,ATP5F1C,ATP5PO,ATP6AP1,CCT3,CCT5,CD9,CNN3,COX6B1,CYCS,DNM3,DSC1,ERP29,FABP5,FKBP4,FUBP1,GNB1,GSK3A,GSTO1,HNRNPA2B1,HNRNPH1,HNRNPM,HSPA5,HSPE1,HUWE1,ILK,LASP1,LTB4R,MAPRE2,MIF,MPPE1,MT-CO2,NAP1L4,NUCKS1,NUDC,P4HB,PABPC1,PCYT1A,PDE4D,PDIA6,PGLS,PLIN3,PPIA,PRKAR2B,PSMD2,PXN,RAB5B,RAB8A,RBM3,RBMX,RELA,RNASEL,RPL7,SAMD9,SLC16A3,SLC44A2,SYTL1,THBS1,TMOD3,TUBB1,USO1,VWF,WIPF1	66 (28)	26	ADORA2A,SYVN1	NMS-873,Ubiquitin		METTL3
SP1-c-Myc	complex		3			-0.508	3.78e-11	0.0412	AMPK,ATF4,BAK1,BAX,BID,CCND1,CDK4/6,CREB1,CTNNB1,ERK,F2,GCK,GLI1,MYC,NFKBIA,Pka,PTEN,RELA,SMAD3,SMAD4,SP1,SP1-c-Myc,STAT3,TP73	ACTB,AHCY,APOE,ATP5F1C,ATP5PO,CBFB,CCT3,CD55,CD9,CORO1C,COX6B1,CTSZ,CYCS,DBI,ERP29,FABP5,FCER1G,GLRX5,HINT1,HNRNPA2B1,HNRNPD,HNRNPH1,HSPA5,HSPD1,HSPE1,HUWE1,ITGA2B,LASP1,LTB4R,MAPRE2,MIF,MPDU1,MT-CO2,NAPA,NUDT21,OLR1,PCYT1A,PDE4D,PDIA6,PLIN3,PPIA,PXN,RAB43,RAB8B,RBMX,RELA,RNASEL,RPL7,SEC23A,SH3KBP1,SLC16A3,STK4,SYNCRIP,SYNE2,SYTL1,TAGLN2,TES,TUBB1,UBE2I,VWF,WIPF1,ZYX	62 (24)	23
HG-7-85-01	chemical drug		3			1.612	3.93e-11	0.0184	ABL1,Akt,AKT1,APP,ATF4,CASP8,CDKN1B,CREB1,CTNNB1,cytarabine,ERK1/2,ESR1,GPX1,HG-7-85-01,HRAS,HSF1,JAK2,JUN,KDR,MAPK1,MTOR,NFAT5,NFkB (complex),NFKBIA,P38 MAPK,PAK2,PI3K (complex),PIK3R1,PLCG1,RET,SNCA,SRC (family),STAT3,TP53,TP63,TP73	ACTB,AHCY,ALDOC,ATP1A1,ATP5F1C,ATP5PO,B2M,CCT3,CCT5,CD55,CD9,CDC42,CTSZ,CYCS,DBI,DNAJB1,DSC1,ERP29,FABP3,FCER1G,FKBP4,GLRX,GSK3A,HNRNPA2B1,HNRNPD,HNRNPH1,HNRNPM,HSPD1,KHSRP,LASP1,LTB4R,MAPRE2,MPDU1,MPPE1,NAP1L4,NAPA,PCYT1A,PDIA6,PGLS,PGP,PLIN3,PPIB,PRKAR2B,PSMD2,PXN,RAB5B,RAB8A,RBM3,RBMX,RNASEL,RPL7,S100A9,SAMD9,SET,SH3KBP1,SLC44A2,STK4,SYNE2,TAGLN2,TMOD3,TUBB1,UBE2I,UQCRC1,USO1,ZYX	65 (36)	33					ABL1
benfur	chemical reagent		3			0.246	3.97e-11	0.0319	AHR,Akt,benfur,CASP3,CASP8,CCND1,CDKN1A,CEBPA,CREBBP,CSF2,cytokine,DICER1,HIF1A,HNF4A,IKBKB,IL18,IL1B,IL6,IRF3,IRF4,JUN,MAPK8,NFkB (complex),NFKB1,NFKBIA,NOS2,PARP1,PPARG,PRKN,PTEN,REL,RELA,SMAD4,SP1,STAT1,STAT4,TP53	ACOT1,APOE,ATP5F1C,ATP5PO,B2M,CBFB,CD55,CYCS,DNAJB1,FABP3,FABP5,FCER1G,FKBP4,FUBP1,GLRX,GSK3A,GSTO1,HINT1,HNRNPA2B1,HNRNPH1,HSPA5,HSPD1,HUWE1,ILK,KHSRP,LTB4R,MAPRE2,MIF,MINPP1,MMP25,MMRN1,MPDU1,MPPE1,NAP1L4,NUCKS1,OLR1,PCYT1A,PGP,PLEK,PLIN3,PPIA,PPIB,PRKAR2B,PSMA2,PSMD2,PXN,RAB43,RAB8A,RBM3,RELA,RPL7,S100A9,SEC23A,SET,SF1,SH3KBP1,SLC16A3,STK4,SYNCRIP,SYTL1,TAGLN2,TMOD3,TUBB1,UBE2I,USO1,VWF	66 (37)	35				Cyclin B
SBF1	phosphatase		3			-1.298	4e-11	0.0011	RAB28,RELA,SBF1,SUV39H1,TP53	AHCY,APOE,ATP1A1,ATP5F1C,B2M,CNN3,DBI,FABP5,FKBP4,FUBP1,GSK3A,HSP90B1,HSPA5,HSPD1,ILK,ITGA2B,LASP1,LTB4R,MAPRE2,MT-CO2,NAP1L4,OLR1,P4HB,PDIA6,PSMD2,PXN,RAB8A,RBM3,RELA,RPL7,SH3KBP1,STK4,SYTL1,TAGLN2,THBS1,UQCRC1,USO1,ZYX	38 (5)	2
PDZGEF	group		3			-0.714	4.08e-11	0.0047	Akt,Cdc42,CHUK,ECT2,FARP2,HRAS,ITGB3,MAPK1,MRTFA,NFATC1,NFkB (complex),NFKB1,P38 MAPK,PDZGEF,PI3K (complex),PLD2,PPARG,PRKCA,PRKCB,Rap1,RASSF5,RELA,RHOA,ROCK2,SRF,STAT5a/b,TP53	ACTB,AHCY,ATP1A1,ATP5F1C,ATP5PO,CD55,CDC42,CNN3,CTSZ,CYCS,DBI,DSC1,ERP29,FABP3,FKBP4,FUBP1,GNB1,GSK3A,HSP90B1,HSPD1,ILK,KHSRP,LASP1,LTB4R,MAPRE2,MPPE1,NAP1L4,P4HB,PCYT1A,PDIA6,PLIN3,PRKAR2B,PSMD2,PXN,RAB8A,RBM3,RPL7,SH3KBP1,SLC16A3,STK4,SYTL1,TAGLN2,TMOD3,TUBB1,U2AF1/U2AF1L5,UBE2I,UQCRC1,USO1,VWF	49 (27)	25				RHOA
squalene	chemical - endogenous mammalian		3			-1.033	4.1e-11	0.0216	AHR,AKT1,ARNT,ESR1,ESR2,HDAC3,JUN,MAPK8,NFKBIA,NR3C1,P38 MAPK,PI3K (complex),PRL,RELA,SOCS6,squalene,STAT1,STAT4,STAT5A,STAT5a/b,STAT5B,TP53	ACOT1,ACTB,AHCY,ALDOC,APOE,ATP1A1,ATP5F1C,B2M,CCT3,CD55,CD9,CDC42,CTSZ,CYCS,DNAJB1,DSC1,FCER1G,FKBP4,FUBP1,GNB1,GSK3A,HNRNPA2B1,HNRNPD,HNRNPM,HSP90B1,HSPD1,ILK,LASP1,MAPRE2,MIF,MMRN1,MPDU1,MYL12A,NAP1L4,OLR1,P4HB,PABPC1,PDIA6,PGLS,PGP,PRKAR2B,PSMD2,PXN,RAB5B,RAB8A,RBM3,RPL7,S100A9,SH3KBP1,SLC44A2,STK4,SYNCRIP,SYTL1,TAGLN2,TMOD3,TUBB1,UBE2I,UQCRC1,USO1,VWF	60 (22)	20
triflusal	chemical drug		3			-1.722	4.12e-11	0.0201	ATF1,Creb,EGFR,EIF4EBP1,FOS,GATA3,IKBKB,IRS2,MAP3K8,MAPK1,MTOR,MYC,NFkB (complex),NFKB1,NFKBIA,NOS2,PDE10A,PTGS1,STAT3,STAT4,STAT5a/b,TLR3,TP53,triflusal	ACTB,AHCY,ALDOC,APOE,ATP1A1,ATP5F1C,AVIL,CCT3,CCT5,CD9,CNN3,COX6B1,CYCS,ERP29,FKBP4,FUBP1,GLRX3,GLRX5,GSK3A,HNRNPA2B1,HNRNPD,HNRNPH1,HSPD1,HSPE1,ILK,KHSRP,LASP1,LTB4R,MAPRE2,MPDU1,MT-CO2,NAP1L4,NUDC,NUDT21,P4HB,PABPC1,PGP,PLIN3,PPIA,PPIB,PRKAR2B,PSMA2,PSMD2,RAB8A,RBM3,RCSD1,RELA,S100A9,SLC16A3,SYTL1,TAGLN2,TES,TUBB1,UQCRC1,USO1,VWF,ZYX	57 (24)	22					APP,NFKB1
ITGAV	transmembrane receptor		2			-1.361	4.13e-11	0.0142	AHR,COL18A1,ERK,ERK1/2,ITGAV,MAP2K1,MAPK1,MAPK3,NFkB (complex),P38 MAPK,PTK2,REL,SMAD3,SYK,Tgf beta,TGFB1,TP53	AHCY,ATP1A1,ATP5F1C,B2M,CBFB,CCT5,CD55,CNN3,CORO1C,DBI,DNAJB1,EIF4H,ERP29,FABP5,FKBP2,FKBP4,FUBP1,GSK3A,HINT1,HNRNPC,HNRNPH1,HSP90B1,HSPD1,LASP1,LTB4R,MAPRE2,MIF,MINPP1,MMP25,MT-CO2,MYL12A,NAP1L4,OLR1,P4HB,PDE4D,PDIA6,PRKAR2B,PSMD2,PXN,RAB8A,RBM3,RCSD1,RPL7,SLC16A3,SRI,TAGLN2,THBS1,TMOD3,UBE2I,UQCRC1,USO1,VWF,WIPF1,ZYX	54 (17)	16	ALOX5,ascorbic acid,DNMT3A,EDN1,HIF1A,IBSP,IL5,SYVN1	calpain inhibitor 2,cilengitide,cyclosporin A,DCN,docetaxel,IL4,JUN,MGAT1,temozolomide		AHR,Collagen type IV,FYN
CDC20	other		2			-0.324	4.36e-11	0.0005	BCL2L1,CDC20,CDKN1A,Cyclin A,E2F1,RASSF1,TP53	AHCY,ATP1A1,ATP5F1C,CD9,CNN3,CYCS,DBI,EIF3I,FABP5,FKBP4,FUBP1,GSK3A,GSTO1,HSP90B1,HSPA5,HSPD1,HSPE1,ILK,ITGA2B,LASP1,LTB4R,MAPRE2,MT-CO2,NAP1L4,NUDC,P4HB,PCYT1A,PDIA6,PSMD2,RAB8A,RBM3,RELA,RPL7,TAGLN2,TUBB1,UQCRC1,USO1,ZYX	38 (7)	6	chrysotile asbestos,docetaxel	BUB3,COPS5,FBXO5,ID1,MAD2L,NEK2,PAX3-FOXO1,PLK1			CCNB1,Cyclin A
ANPEP	peptidase		3	Activated		3.101	4.46e-11	0.0178	ADCY,Akt,AKT1,ANPEP,bestatin,CXCL8,EGFR,ERBB2,ERK,hydrogen peroxide,Interferon alpha,ITGB3,LIF,MAPK1,NFkB (complex),NFKBIA,Notch,PAK2,PI3K (complex),PIK3R1,PRKCA,PRKCB,RELA,RHOA,STAT3,TP53	ACTB,AHCY,ALDOC,ATP5F1C,CCT5,CD9,CDC42,CNN3,CTSZ,CYCS,DBI,DNAJB1,ERP29,FCER1G,FKBP4,FUBP1,GLRX,GSK3A,HNRNPA2B1,HNRNPD,HNRNPH1,HNRNPM,HSP90B1,HSPD1,HSPE1,ILK,ITGA2B,LTB4R,MAPRE2,MPDU1,MPPE1,NAP1L4,NUDC,P4HB,PABPC1,PDIA6,PPIA,PRKAR2B,PSMD2,PXN,RAB8A,RBM3,RNASEL,RPL7,SH3KBP1,SLC16A3,STK4,SYTL1,TAGLN2,TUBB1,UBE2I,UQCRC1,USO1,VWF,ZYX	55 (26)	23	mycophenolic acid	curcumin,FFAR3,Immunoglobulin,methylprednisolone,miR-1-3p (and other miRNAs w/seed GGAAUGU),miR-30c-5p (and other miRNAs w/seed GUAAACA),silibinin,WT1			NDRG1
DNMT3B	enzyme		3			-1.969	4.62e-11	0.0414	Akt,AKT1,AR,Cdc42,CDKN1A,CREB1,CTNNB1,DNA-methyltransferase,DNMT3A,DNMT3B,EGFR,EIF4E,FGF10,HIF1A,HRAS,IGF1R,MAPK1,MTOR,NCOA3,NFkB (complex),NFKB1,P38 MAPK,PTEN,RB1,RELA,SP1,STAT3,STAT5a/b,STAT6,TP53,TSC2	AHCY,ATP5F1C,ATP6AP1,AVIL,CCT3,CCT5,CD9,CDC42,CNN3,COX6B1,CTSZ,CYCS,DBI,DNAJB1,DPP7,ERP29,FCER1G,FKBP4,FUBP1,GNB1,GSK3A,GSTO1,HINT1,HNRNPD,HNRNPH1,HNRNPH3,HNRNPM,HUWE1,KHSRP,LTB4R,MAPRE2,MIF,MPPE1,MT-CO2,NAP1L4,NUCKS1,NUDC,P4HB,PABPC1,PDIA6,PGP,PLIN3,PPIA,PPIB,PRKAR2B,PSMA2,PSMD2,PXN,RAB43,RAB8A,RBM3,RBMX,RPL7,S100A9,SEC23A,SLC16A3,STK4,SYNCRIP,SYTL1,TES,THBS1,TMOD3,TUBB1,UBE2I,USO1,VWF	66 (31)	30	curcumin,SMAD7	PTPRR,TP53		APP,DNAJB1,NFATC3,PRNP	ADORA1,PPP1R3A,PSEN2
6-methylsulfinylhexyl isothiocyanate	chemical reagent		3			0.295	4.67e-11	0.006	6-methylsulfinylhexyl isothiocyanate,Akt,aristolochic acid I,CHUK,ERK1/2,GST,GSTO1,NFkB (complex),NFKBIA,NFKBIZ,NQO1,P38 MAPK,PARP1,PDK1,Pkc(s),tanespimycin,TP53	AHCY,ATP1A1,ATP5F1C,B2M,CD55,CD9,CNN3,CTSZ,CYCS,DBI,DNAJB1,FKBP4,FUBP1,GSK3A,HNRNPA2B1,HNRNPC,HNRNPM,HSP90B1,HSPD1,ILK,ITGA2B,LASP1,LTB4R,MAPRE2,MPDU1,MPPE1,MT-CO2,NAP1L4,OLR1,P4HB,PDIA6,PSMD2,PXN,RAB8A,RBM3,RBMX,RPL7,S100A9,SAMD9,SLC16A3,SLC44A2,TAGLN2,TMOD3,UQCRC1,USO1,ZYX	46 (17)	14				NQO1
AZD3514	chemical drug		3			0.868	4.83e-11	0.0283	Akt,AKT1,AR,AZD3514,CCNE1,Creb,CREB1,EGFR,ERBB2,ESR1,HIF1A,MAPK1,MAPK7,NCOA2,NFkB (complex),NFKB1,NFKBIA,Pka,RELA,SMAD3,SRC (family),SREBF2,STAT3,STING1,STUB1,TP53	ACOT1,ACTB,AHCY,ALDOC,ATP1A1,ATP5F1C,ATP5PO,ATP6AP1,CCT3,CCT5,CD9,CNN3,COX6B1,CTSZ,DBI,DNM3,DSC1,ERP29,FABP5,FKBP4,FUBP1,GNB1,GSTO1,HNRNPA2B1,HNRNPH1,HNRNPM,HSPA5,HSPD1,HSPE1,HUWE1,ILK,KHSRP,LASP1,MAPRE2,MIF,MPDU1,MPPE1,MT-CO2,NAP1L4,NUCKS1,NUDC,P4HB,PABPC1,PCYT1A,PDE4D,PDIA6,PGLS,PLIN3,PPIA,PRKAR2B,PSMD2,PXN,RAB5B,RAB8A,RBM3,RBMX,RPL7,SAMD9,SLC16A3,SLC44A2,TMOD3,UQCRC1,USO1,WIPF1,ZYX	65 (26)	24
BI 860585	chemical drug		3			-1.732	4.96e-11	0.0078	AKT1,AKT3,BI 860585,CCND1,CDKN1B,Creb,MTOR,MTORC1,MTORC2,Pkc(s),RELA,RICTOR,SREBF1,SREBF2,TFEB,TP53	AHCY,ALDOC,APOE,ATP1A1,ATP5PO,ATP6AP1,AVIL,CD55,CNN3,COX6B1,CYCS,DBI,FABP3,FCER1G,FKBP4,FUBP1,GSK3A,HNRNPM,HSP90B1,HSPA5,HSPE1,ILK,ITGA2B,LTB4R,MAPRE2,NAP1L4,OLR1,P4HB,PDIA6,PGP,PLIN3,PPIB,PSMA2,PSMC6,PSMD2,PSMD6,RAB8A,RBM3,S100A9,SH3KBP1,SLC16A3,STK4,SYTL1,TAGLN2,TUBB1,UQCRC1,USO1,ZYX	48 (16)	13					MTORC1,MTORC2
DS-3078a	chemical drug		3			-1.732	4.96e-11	0.0078	AKT1,AKT3,CCND1,CDKN1B,Creb,DS-3078a,MTOR,MTORC1,MTORC2,Pkc(s),RELA,RICTOR,SREBF1,SREBF2,TFEB,TP53	AHCY,ALDOC,APOE,ATP1A1,ATP5PO,ATP6AP1,AVIL,CD55,CNN3,COX6B1,CYCS,DBI,FABP3,FCER1G,FKBP4,FUBP1,GSK3A,HNRNPM,HSP90B1,HSPA5,HSPE1,ILK,ITGA2B,LTB4R,MAPRE2,NAP1L4,OLR1,P4HB,PDIA6,PGP,PLIN3,PPIB,PSMA2,PSMC6,PSMD2,PSMD6,RAB8A,RBM3,S100A9,SH3KBP1,SLC16A3,STK4,SYTL1,TAGLN2,TUBB1,UQCRC1,USO1,ZYX	48 (16)	13					MTORC1,MTORC2
LXI-15029	chemical drug		3			-1.732	4.96e-11	0.0078	AKT1,AKT3,CCND1,CDKN1B,Creb,LXI-15029,MTOR,MTORC1,MTORC2,Pkc(s),RELA,RICTOR,SREBF1,SREBF2,TFEB,TP53	AHCY,ALDOC,APOE,ATP1A1,ATP5PO,ATP6AP1,AVIL,CD55,CNN3,COX6B1,CYCS,DBI,FABP3,FCER1G,FKBP4,FUBP1,GSK3A,HNRNPM,HSP90B1,HSPA5,HSPE1,ILK,ITGA2B,LTB4R,MAPRE2,NAP1L4,OLR1,P4HB,PDIA6,PGP,PLIN3,PPIB,PSMA2,PSMC6,PSMD2,PSMD6,RAB8A,RBM3,S100A9,SH3KBP1,SLC16A3,STK4,SYTL1,TAGLN2,TUBB1,UQCRC1,USO1,ZYX	48 (16)	13					MTORC1,MTORC2
PPM1D	phosphatase		2			0.802	4.98e-11	0.0097	AR,ATF2,ESR1,GLI1,JUN,MDM4,NCOA1,P38 MAPK,PPM1D,RELA,SMAD4,STAT1,TP53,VDR	ACTB,AHCY,APOE,ATP1A1,ATP5F1C,ATP6AP1,B2M,CBFB,CCT3,CD55,CDC42,CNN3,COX6B1,CYCS,DBI,DSC1,FCER1G,FKBP4,FUBP1,GNB1,GSK3A,HNRNPA2B1,HNRNPD,HSPD1,HUWE1,LASP1,MAPRE2,MIF,MT-CO2,NAP1L4,OLR1,P4HB,PDIA6,PGLS,PSMD2,PXN,RAB5B,RAB8A,RAB8B,RBM3,RELA,RNASEL,RPL7,S100A9,SAMD9,SH3KBP1,SLC16A3,SLC44A2,SYTL1,TAGLN2,TMOD3,U2AF1/U2AF1L5,UBE2I,UQCRC1,USO1,WIPF1	56 (14)	14	5-azacytidine,anisomycin,Z-LLL-CHO			ESR1	ATM/ATR,CHEK1,CHEK2
ABTL0812	chemical drug		3			-1.732	5.03e-11	0.0079	ABTL0812,AKT1,AKT3,CCND1,CDKN1B,Creb,DHFR,MTOR,MTORC1,MTORC2,Nos,Pkc(s),RELA,RICTOR,SREBF1,SREBF2,TFEB,TP53	AHCY,ALDOC,APOE,ATP1A1,ATP5PO,ATP6AP1,AVIL,CD55,CNN3,COX6B1,CYCS,DBI,FABP3,FCER1G,FKBP4,FUBP1,GSK3A,HNRNPM,HSP90B1,HSPA5,HSPE1,ILK,ITGA2B,LTB4R,MAPRE2,NAP1L4,OLR1,P4HB,PDIA6,PGP,PLIN3,PPIB,PSMA2,PSMC6,PSMD2,PSMD6,RAB8A,RBM3,S100A9,SH3KBP1,SLC16A3,STK4,SYTL1,TAGLN2,TUBB1,UQCRC1,USO1,ZYX	48 (18)	14					MTORC1,MTORC2
NSC 126405	chemical reagent		3			1.732	5.03e-11	0.0078	AKT1,AKT3,CCND1,CDKN1B,Creb,MTOR,MTORC1,MTORC2,NSC 126405,Pkc(s),RELA,RICTOR,SREBF1,SREBF2,TFEB,TP53	AHCY,ALDOC,APOE,ATP1A1,ATP5PO,ATP6AP1,AVIL,CD55,CNN3,COX6B1,CYCS,DBI,FABP3,FCER1G,FKBP4,FUBP1,GSK3A,HNRNPM,HSP90B1,HSPA5,HSPE1,ILK,ITGA2B,LTB4R,MAPRE2,NAP1L4,OLR1,P4HB,PDIA6,PGP,PLIN3,PPIB,PSMA2,PSMC6,PSMD2,PSMD6,RAB8A,RBM3,S100A9,SH3KBP1,SLC16A3,STK4,SYTL1,TAGLN2,TUBB1,UQCRC1,USO1,ZYX	48 (16)	13				MTORC1,MTORC2
temozolomide	chemical drug		2			0.603	5.12e-11	0.0036	Akt,AKT1,EGFR,NFkB (complex),P38 MAPK,temozolomide,TP53	ACTB,AHCY,ATP1A1,ATP5F1C,CCT5,CD55,CNN3,DBI,FKBP4,FUBP1,GSK3A,HNRNPA2B1,HNRNPD,HNRNPH1,HNRNPM,HSP90B1,HSPD1,HSPE1,ILK,ITGA2B,LASP1,LTB4R,MAPRE2,MIF,MPPE1,MT-CO2,NAP1L4,NUDC,OLR1,P4HB,PABPC1,PDIA6,PPIA,PSMD2,PXN,RAB8A,RBM3,RPL7,SLC16A3,TAGLN2,THBS1,UQCRC1,USO1,ZYX	44 (7)	7		APEX1		ATR,CHEK1,CHEK2,ID1,reactive oxygen species,TP53	ABL1,EGFR,ITGAV,MSH6,MTORC1,PRL
FRAX120	chemical drug		3	Activated		2.364	5.15e-11	0.0206	BCL6,CASP8,Creb,CTNNB1,ESR1,FLNA,FRAX120,Insulin,JUN,MAPK1,MYC,NCOA3,NFkB (complex),PAK1,PAK2,PAK4,Pka,RELA,SNAI1,TP53	ATP1A1,ATP5F1C,ATP5PO,B2M,CCT3,CCT5,CDC42,CNN3,COX6B1,CYCS,DBI,DSC1,FABP3,FABP5,FCER1G,FKBP2,FKBP4,FUBP1,GLRX5,GNB1,HNRNPD,HNRNPH1,HSP90B1,HSPE1,ILK,LASP1,LTB4R,MAPRE2,NAP1L4,NUDT21,P4HB,PDE4D,PDIA6,PEBP1,PGLS,PPIA,PPIB,PSMA2,PSMD2,PXN,RAB5B,RAB8A,RBM3,RNASEL,RPL7,S100A9,SAMD9,SH3KBP1,SLC44A2,STK4,SYTL1,TES,TMOD3,TUBB1,UBE2I,USO1,WIPF1,ZYX	58 (20)	17
FRAX355	chemical drug		3	Activated		2.364	5.15e-11	0.0206	BCL6,CASP8,Creb,CTNNB1,ESR1,FLNA,FRAX355,Insulin,JUN,MAPK1,MYC,NCOA3,NFkB (complex),PAK1,PAK2,PAK4,Pka,RELA,SNAI1,TP53	ATP1A1,ATP5F1C,ATP5PO,B2M,CCT3,CCT5,CDC42,CNN3,COX6B1,CYCS,DBI,DSC1,FABP3,FABP5,FCER1G,FKBP2,FKBP4,FUBP1,GLRX5,GNB1,HNRNPD,HNRNPH1,HSP90B1,HSPE1,ILK,LASP1,LTB4R,MAPRE2,NAP1L4,NUDT21,P4HB,PDE4D,PDIA6,PEBP1,PGLS,PPIA,PPIB,PSMA2,PSMD2,PXN,RAB5B,RAB8A,RBM3,RNASEL,RPL7,S100A9,SAMD9,SH3KBP1,SLC44A2,STK4,SYTL1,TES,TMOD3,TUBB1,UBE2I,USO1,WIPF1,ZYX	58 (20)	17
Max-Myc	complex		3			-0.128	5.26e-11	0.0343	AKT1,BAK1,BAX,CDKN1A,CDKN1B,CREB1,CTNNB1,E2F1,EIF2AK3,ERK,F2,GCK,GLI1,HRAS,HSF1,Max-Myc,MYC,NFkB (complex),NFKBIA,Pka,PTEN,RB1,RELA,SP1,TP73	ACTB,AHCY,ATP5F1C,ATP5PO,B2M,CCT3,CCT5,CORO1C,COX6B1,CTSZ,CYCS,DBI,DNAJB1,EIF3I,FABP5,GLRX5,GNB1,GSTO1,HINT1,HNRNPA2B1,HNRNPD,HNRNPH1,HNRNPM,HSPA5,HSPD1,HSPE1,HUWE1,ILK,ITGA2B,LTB4R,MAPRE2,MIF,MPDU1,NUDC,NUDT21,OLR1,P4HB,PDE4D,PDIA6,PLIN3,PPIA,PSMD2,PXN,RAB43,RAB8B,RBMX,RPL7,S100A9,SEC23A,SH3KBP1,SLC16A3,STK4,SYNCRIP,SYNE2,SYTL1,TAGLN2,TES,UBE2I,UQCRC1,USO1,VWF	61 (25)	24
dioleoylphosphatidic acid	chemical - endogenous mammalian		3			-0.272	5.31e-11	0.0149	Akt,AKT1,Creb,CREB1,dioleoylphosphatidic acid,FLNA,HIF1A,HMGA1,MTOR,MYC,NFKB1,p70 S6k,PDX1,RICTOR,RPS6KB1,TP53	ALDOC,ATP1A1,ATP5PO,ATP6AP1,AVIL,B2M,CCT3,CD9,CNN3,CYCS,DBI,FCER1G,FKBP4,FUBP1,GLRX5,GSK3A,HNRNPA2B1,HNRNPD,HNRNPH1,HNRNPM,HSPE1,HUWE1,ILK,KHSRP,LTB4R,MAPRE2,MIF,MPPE1,MT-CO2,NAP1L4,NUCKS1,NUDT21,OLR1,P4HB,PDIA6,PGP,PLIN3,PPIB,PSMA2,PSMC6,PSMD2,PSMD6,PXN,RAB8A,RBM3,RBMX,SEPTIN2,SH3KBP1,SLC16A3,SYTL1,TES,UBE2I,UQCRC1,USO1	54 (16)	13				RPS6KB1
tyrphostin AG 527	chemical drug		3	Activated		3.3	5.36e-11	0.0159	AGT,Akt,AKT1,CCND1,Cdc42,CREB1,EGFR,EIF2AK3,ERBB2,ESR1,FAS,FOS,FOXO1,FOXO3,HIF1A,HRAS,IKBKB,JAK2,KLF11,KRAS,MAPK8,MAPK9,NFE2L2,NFkB (complex),NFKB1,NFKBIA,NFKBIB,NR3C2,P38 MAPK,PARP1,PI3K (complex),PI3K (family),PRKCD,RB1,RELA,SP1,SRC (family),STAT3,STAT5B,STAT6,TEAD1,TP53,TP73,tyrphostin AG 527,VEGFA,WBP2,YAP1	ACOT1,ACTB,AHCY,ATP1A1,ATP5F1C,CBFB,CCT3,CCT5,CD9,CORO1C,COX6B1,CTSZ,DBI,DSC1,FABP3,FABP5,FKBP4,FUBP1,GNB1,GSK3A,GSTO1,HINT1,HNRNPA2B1,HNRNPD,HNRNPH1,HNRNPH3,HNRNPM,HSP90B1,HSPA5,HSPE1,HUWE1,ILK,KHSRP,LASP1,MAPRE2,MIF,MMP25,MMRN1,MPDU1,MPPE1,MT-CO2,NAP1L4,NAPA,NUCKS1,NUDC,PABPC1,PDIA6,PGLS,PPIA,PSMA2,PSMC6,PSMD2,PXN,RAB5B,RAB8A,RBM3,RBMX,RELA,RNASEL,RPL7,SAMD9,SEC23A,SEPTIN2,SET,SLC44A2,SYNE2,SYT…	72 (47)	45					EGFR
anisomycin	chemical - endogenous non-mammalian		2			0.272	5.38e-11	0.0191	anisomycin,APP,ATF1,ATF2,CASP8,CREB1,EIF4E,JUN,MAP2K3,MAPK1,MAPK8,MAPK9,MTOR,MYB,NFKB1,NR4A1,P38 MAPK,PIK3R1,PPARG,SRF,STAT1,TP53,TSC2	ACTB,AHCY,ATP1A1,ATP5F1C,ATP5PO,AVIL,CD55,CD9,CNN3,COX6B1,CTSZ,CYCS,DBI,DPP7,ERP29,FABP3,FCER1G,FKBP4,FUBP1,HNRNPA2B1,HSPA5,ILK,KHSRP,LASP1,LTB4R,MAPRE2,MIF,MT-CO2,NAP1L4,OLR1,P4HB,PDIA6,PGP,PLIN3,PPIB,PRKAR2B,PSMD2,RAB8A,RBM3,RBMX,RNASEL,RPL7,S100A9,SH3KBP1,SLC16A3,STK4,SYTL1,TAGLN2,TMOD3,UBE2I,UQCRC1,USO1,WIPF1,ZYX	54 (23)	23				APP,ATF1,CRYAB,JUN,MAPK12,MTOR,MTORC1,NFKB1,PLA2G4A,PPM1D,RPS6KB1,TAB1,TP53	AHR,HIF1A,SKI,VIP
BHLHE40	transcription regulator		3	Inhibited		-3.536	5.41e-11	0.0234	Akt,AKT1,Alp,BHLHE40,CDKN1A,CDKN1B,CEBPB,CHUK,EGFR,ESR1,ESR2,EZH2,FOXC1,GATA1,HIF1A,HSF1,IRF3,KLF11,MAP3K8,MAPK1,MASTL,MTOR,NFAT5,NFE2L2,NFKB1,NFKBIA,NRF1,PDX1,POU5F1,PPARGC1A,PRL,PTEN,RELA,Smad2/3,SP1,SREBF1,STAT3,STK11,TP53,TP73,TSC2,YAP1	AHCY,ALDOC,B2M,CBFB,CCT5,CD55,CD9,CDC42,CTSZ,DNAJB1,DPP7,DSC1,ERP29,FABP3,FKBP4,FUBP1,GLRX,GNB1,GSTO1,HINT1,HNRNPH1,HNRNPM,HSPA5,HUWE1,ILK,KHSRP,LTB4R,MAPRE2,MMP25,MPDU1,MPPE1,MT-CO2,MYL12A,NAP1L4,NUCKS1,NUDC,NUDT21,OLR1,P4HB,PGLS,PGP,PLEK,PPIA,PSMA2,PSMC6,PSMD2,PSMD6,RAB11FIP1,RAB43,RAB5B,RAB8A,RBM3,RCSD1,RELA,RNASEL,RPL7,S100A9,SEC23A,SH3KBP1,SLC16A3,SLC44A2,SRI,STK4,SYNCRIP,SYNE2,SYTL1,TES,THB…	72 (42)	41	ASPSCR1-TFE3,CD28,LINC01139,SYVN1,TP53	GnRH analog		AHR,ALOX5,CYBB,ECM1,HAS1,HK2,IL13,IL5,MEFV,NDRG1,PLA2G4A,PRDX5,RBCK1,SRI,TGM2	ACAC,ID1,IFI16
mir-34	microRNA		2			0.295	5.45e-11	0.0045	Akt,mir-34,MYCN,NANOG,RELA,SNAI1,SOX2,TP53	ACTB,AHCY,APOE,ATP1A1,ATP5F1C,CD55,CD9,CDC42,CNN3,DBI,FABP5,FKBP4,FUBP1,GSK3A,HNRNPH1,HSP90B1,HSPA5,HSPD1,ILK,ITGA2B,LASP1,LTB4R,MAPRE2,MPPE1,MT-CO2,MYL12A,NAP1L4,NUDT21,OLR1,P4HB,PDIA6,PEBP1,PSMD2,PXN,RAB8A,RBM3,SEPTIN2,SET,SH3KBP1,STK4,SYTL1,TAGLN2,UQCRC1,USO1,WIPF1,ZYX	46 (8)	8	5-fluorouracil,aldosterone,ALOX5,budesonide,LATS2	N-acetyl-L-cysteine,pifithrin alpha,RBFOX2,RPL22		ITGA2B	BIRC5,CCNE1,CDK4/6,CHEK2,DNM1L,E2F3,FN1,HEY1,HIF1A,HK2,PKM,PLCG1
medorinone	chemical drug		3			0.617	5.8e-11	0.0028	Creb,cyclic AMP,MAPK1,medorinone,PDE3A,PDE3B,PIK3CG,RAF1,TP53	AHCY,APOE,ATP1A1,ATP5F1C,B2M,CDC42,CNN3,CYCS,DBI,ERP29,FABP5,FCER1G,FKBP4,FUBP1,GSK3A,HNRNPA2B1,HSPA5,HSPD1,ILK,ITGA2B,LASP1,LTB4R,MAPRE2,MT-CO2,NAP1L4,P4HB,PDE4D,PDIA6,PLIN3,PRKAR2B,PSMD2,RAB8A,RBM3,RELA,RPL7,TAGLN2,UBE2I,UQCRC1,USO1,VWF,WIPF1,ZYX	42 (9)	6					PDE3A
hyaluronidase	group		3	Inhibited		-2.717	5.95e-11	0.0143	AHR,Akt,AKT1,APOA1,AR,ARG1,CD44,CEBPA,CEBPB,Creb,CSF2,EGFR,ERBB2,ERN1,ESR1,HIF1A,HNF4A,hyaluronidase,IL6,IRF3,IRF4,lipopolysaccharide,MAPK1,NFkB (complex),NFKB1,NFKBIA,NFKBIB,OSM,PPARG,PTEN,REL,RELA,STAT4,STAT6,SYK,TGFB1,TLR4,TP53,XBP1	ACOT1,APOE,ATP5F1C,ATP5PO,ATP6AP1,CBFB,CCT3,CCT5,CDC42,CORO1C,COX6B1,DDX17,DHRS7,DNAJB1,EIF4H,ERP29,ERP44,FABP3,FABP5,FUBP1,GLRX,GNB1,GSK3A,HNRNPC,HNRNPD,HNRNPH1,HNRNPH3,HNRNPM,HSPA5,HSPE1,HUWE1,KHSRP,MAPRE2,MIF,MINPP1,MMRN1,MPDU1,MPPE1,MYL12A,NAP1L4,NUCKS1,NUDC,NUDT21,OLR1,PABPC1,PDE4D,PDIA6,PGLS,PGP,PLEK,PLIN3,PPIB,PSMA2,PSMD2,PXN,RAB1B,RAB43,RAB5B,RAB8A,RBM3,RCSD1,RELA,RPL7,SAMD9,SEPTIN9,SF1,S…	78 (39)	38					FN1
ABL1	kinase		2			-1.432	5.98e-11	0.0158	ABL1,Akt,APP,CASP8,CDKN1B,CTNNB1,cytarabine,ERK1/2,ESR1,GPX1,JAK2,MAPK8,MAPK9,MTOR,NFAT5,NFkB (complex),NFKBIA,P38 MAPK,PAK2,PI3K (complex),PIK3R1,SNCA,STAT3,TP53,TP63,TP73	ACTB,AHCY,ATP1A1,ATP5F1C,ATP5PO,B2M,CD55,CD9,CDC42,CTSZ,CYCS,DBI,DSC1,FABP3,FCER1G,FKBP4,GLRX,GNB1,GSK3A,HNRNPD,HNRNPH1,ILK,ITGA2B,KHSRP,LASP1,LTB4R,MAPRE2,MIF,MPDU1,MPPE1,NAP1L4,P4HB,PDIA6,PGLS,PGP,PLIN3,PPIB,PRKAR2B,PSMD2,PXN,RAB5B,RAB8A,RBM3,RNASEL,RPL7,S100A9,SAMD9,SET,SLC44A2,STK4,SYNE2,TAGLN2,TMOD3,TUBB1,UBE2I,UQCRC1,USO1,WIPF1,ZYX	59 (26)	25	ATM/ATR,EGFR,FYN,Insulin,Integrin,JUN,PKM,PTPN11,TNFSF10,Z-LLL-CHO	danusertib,dasatinib,HG-7-85-01,KW 2449,N-acetyl-L-cysteine,SKLB1028,temozolomide		APP,ATR,CCNE1,CGA,DNM2,ESR1,MTOR,reactive oxygen species,SMAD1/5,VIP,WRN	PRKN
DONSON	other		3			-1.98	6.03e-11	0.0071	Akt,CDKN1A,CHEK1,cytarabine,DONSON,E2F1,E2F3,EGFR,MDM4,MTOR,NBN,NFkB (complex),P38 MAPK,PI3K (complex),RASSF1,RB1,RELA,STAT3,TP53	AHCY,APOE,ATP5F1C,AVIL,CCT5,CD55,CNN3,COX6B1,CYCS,DBI,EIF3I,FABP5,FCER1G,FKBP4,FUBP1,GSK3A,GSTO1,HNRNPA2B1,HNRNPD,HNRNPH1,HSPD1,ITGA2B,LASP1,LTB4R,MAPRE2,MIF,MPPE1,NAP1L4,NUCKS1,P4HB,PABPC1,PDIA6,PGP,PPIA,PPIB,PRKAR2B,PXN,RAB8A,RBM3,RPL7,SH3KBP1,SLC16A3,STK4,SYTL1,TAGLN2,TUBB1,UQCRC1,USO1,WIPF1,ZYX	50 (19)	16				CHEK1
Gcn5l	group		3			-0.687	6.06e-11	0.0234	Akt,CCNE1,CTNNB1,E2F1,Gcn5l,KAT2A,MAPK1,MTOR,MYOD1,NFkB (complex),PDX1,PPARGC1A,RELA,TP53	ACTB,AHCY,ATP1A1,ATP5F1C,ATP5PO,AVIL,B2M,CD9,CNN3,DBI,EIF3I,ERP29,FABP3,FABP5,FKBP4,FUBP1,GSK3A,HNRNPA2B1,HNRNPD,HSP90B1,HSPA5,HSPD1,HSPE1,ILK,ITGA2B,LASP1,LTB4R,MAPRE2,MPPE1,MT-CO2,NAP1L4,P4HB,PCYT1A,PDIA6,PGP,PLIN3,PPIB,PRKAR2B,PSMD2,PXN,RAB8A,RBM3,RPL7,SH3KBP1,SLC16A3,STK4,SYTL1,TAGLN2,THBS1,UBE2I,USO1,WIPF1,ZYX	53 (14)	14
HA121-28	chemical drug		3	Activated		2.183	6.63e-11	0.0327	AGT,Akt,AKT1,ATF4,Cdc42,Creb,CREB1,CTNNB1,EGFR,ERBB2,ESR1,FAS,FLT1,FOS,FOXO1,FOXO3,HA121-28,HIF1A,HRAS,HSF1,JAK2,JUN,KLF11,KRAS,MAPK1,MAPK8,MTOR,NFkB (complex),NFKBIA,P38 MAPK,PI3K (complex),PI3K (family),Pka,RET,SP1,SRC (family),STAT3,STAT5a/b,STAT5B,STAT6,Vegf Receptor,WBP2,YAP1	ACOT1,ACTB,AHCY,ATP1A1,ATP5PO,AVIL,CCT3,CCT5,CD9,CDC42,CORO1C,CTSZ,CYCS,DNAJB1,DSC1,ERP29,FABP3,FABP5,FKBP4,GSK3A,HINT1,HNRNPA2B1,HNRNPD,HNRNPH1,HNRNPH3,HNRNPM,HSP90B1,HSPA5,HSPD1,HSPE1,HUWE1,LASP1,MIF,MMP25,MMRN1,MPDU1,MPPE1,MT-CO2,NAPA,NUCKS1,NUDC,OLR1,P4HB,PABPC1,PCYT1A,PDE4D,PGLS,PGP,PLIN3,PPIA,PPIB,PSMA2,PSMC6,PXN,RAB5B,RBMX,RELA,SAMD9,SEPTIN2,SET,SH3KBP1,SLC44A2,STK4,TAGLN2,TES,THBS1,TUBB1,…	68 (43)	41					EGFR
NLRP2	other		3			0.391	7.12e-11	0.013	AHR,Akt,CASP1,caspase,CCND1,CEBPA,CSF2,cytokine,HIF1A,HNF4A,IKBKB,IL18,IL33,IL6,IRF3,IRF4,JUN,NFkB (complex),NFKB1,NFKBIA,NLRP2,NOS2,PAK2,PARP1,PPARG,RB1,REL,RELA,SP1,STAT1,STAT3,STAT4,TP53	ACOT1,APOE,ATP5F1C,ATP5PO,CD9,CNN3,COX6B1,CYCS,DNAJB1,FABP3,FABP5,FCER1G,FKBP4,FUBP1,GLRX,GSK3A,HINT1,HNRNPA2B1,HSPD1,HSPE1,HUWE1,ILK,KHSRP,MAPRE2,MINPP1,MMP25,MMRN1,MPDU1,MPPE1,NAP1L4,NUCKS1,OLR1,PGP,PLEK,PLIN3,PPIA,PPIB,PRKAR2B,PSMA2,PSMD2,PXN,RAB8A,RBM3,RELA,RPL7,SET,SF1,SH3KBP1,SLC16A3,STK4,SYTL1,TAGLN2,THBS1,TMOD3,TUBB1,UBE2I,USO1,VWF,WIPF1	59 (33)	31
MHC with antigen	complex		3	Inhibited		-2.394	7.41e-11	0.0235	Akt,AKT1,B2M,CD247,CD3,CD3-TCR,CD4,CD8,CREB1,ERK,FAS,FOS,GAB2,HLA-DQA1,HRAS,HSF1,IFNG,IKBKB,IL2,JUN,JUNB,KRAS,MAP3K7,MAP4K3,MAPK1,MAPK8,MAPK9,Mek,MHC with antigen,MTOR,NFkB (complex),NFKB1,NFKBIA,NR4A1,P38 MAPK,PAK2,PI3K (complex),PRKCA,PRKCB,RB1,REL,RELA,SREBF1,SRF,STAT4,STAT5a/b,STAT5B,STAT6,SYK,TCR,Tra@-Trb@,ZAP70	ACOT1,AHCY,ATP5F1C,AVIL,CCT3,CCT5,CDC42,COX6B1,CYCS,DBI,DNAJB1,ERP29,FABP3,FABP5,FKBP2,FKBP4,GNB1,HINT1,HNRNPH3,HNRNPM,HSP90B1,HSPA5,HSPD1,HUWE1,ILK,ITGA2B,KHSRP,LASP1,LTB4R,MIF,MINPP1,MMP25,MPDU1,MPPE1,MYL12A,P4HB,PCYT1A,PDE4D,PGP,PLEK,PPIA,PPIB,PRKAR2B,PSMA2,PSMC6,PXN,RBM3,RBMX,RCSD1,RELA,RNASEL,RPL7,SAMD9,SLC16A3,STK4,SYNCRIP,SYTL1,TAGLN2,TES,TMOD3,TUBB1,UQCRC1,VPS4B	63 (52)	45				CD3-TCR,TCR,Tra@-Trb@
HSPA1A/HSPA1B	enzyme	-1.543	2			-1.809	7.46e-11	0.0048	BID,DUSP1,EGFR,ERK1/2,HSPA1A/HSPA1B,MAP2K3,NFkB (complex),NFKBIA,P38 MAPK,TP53	ACTB,AHCY,ATP1A1,ATP5F1C,B2M,CCT5,CD55,CNN3,CTSZ,DBI,FKBP4,FUBP1,GSK3A,HNRNPA2B1,HNRNPD,HNRNPH1,HSP90B1,HSPD1,HSPE1,ILK,LASP1,LTB4R,MAPRE2,MIF,MPDU1,MT-CO2,NAP1L4,NUDC,P4HB,PABPC1,PDIA6,PPIA,PSMD2,PXN,RAB8A,RBM3,RPL7,S100A9,SLC16A3,STK4,TAGLN2,UQCRC1,USO1,ZYX	44 (10)	9	4-hydroxynonenal,ANGPT2,azetidyl-2-carboxylic acid,bisphenol A,bortezomib,cis-urocanic acid,curcumin,HSF1,IL4,ING1,methylprednisolone,PAX3-FOXO1,PLK1,tanespimycin	APP,CD28,CD3,IND S7,MEL S3		EGFR,XBP1
bisindolylmaleimide iv	chemical drug		2			1.414	7.48e-11	0.0106	bisindolylmaleimide iv,Creb,CREB1,EGFR,ERK1/2,FLNA,HRAS,IRS2,MAPK1,NFKB1,P38 MAPK,PRKCA,TP53	ACTB,AHCY,APOE,ATP1A1,ATP5F1C,B2M,CCT5,CD9,CNN3,CYCS,DBI,ERP29,FABP5,FCER1G,FKBP4,FUBP1,GNB1,GSK3A,HNRNPD,HNRNPH1,HSP90B1,HSPE1,ILK,KHSRP,LASP1,LTB4R,MAPRE2,MIF,NAP1L4,NUDC,PABPC1,PCYT1A,PDIA6,PLIN3,PPIA,PSMD2,PXN,RAB8A,RBM3,RBMX,RPL7,S100A9,SH3KBP1,SYTL1,TAGLN2,UBE2I,UQCRC1,USO1,WIPF1,ZYX	50 (13)	12					CCN2,CGA,EGFR,NFKB1,PRKCA,PTPN11,RHOA,RPS6KB1,TP53
prochlorperazine	chemical drug		3			0.42	7.53e-11	0.0061	ADORA2A,Creb,CREB1,cyclic AMP,DRD1,DRD2,DUSP1,EGFR,FLNA,HIF1A,MTOR,NFKB1,Pka,PRL,prochlorperazine,PTH,RICTOR,RPS6KB1,STAT5B,TP53	ACOT1,AHCY,ALDOC,ATP5PO,AVIL,CDC42,CNN3,COX6B1,CYCS,DBI,FCER1G,FKBP4,FUBP1,GSK3A,HNRNPD,HNRNPH1,HSPE1,HUWE1,ILK,KHSRP,LTB4R,MAPRE2,MMRN1,NAP1L4,NAPA,NUCKS1,NUDC,OLR1,PABPC1,PDE4D,PDIA6,PGP,PLIN3,PPIB,PSMA2,PSMC6,PSMD2,PSMD6,PXN,RAB8A,RBM3,RBMX,S100A9,SAMD9,SH3KBP1,SLC16A3,SYTL1,THBS1,UQCRC1,USO1,ZYX	51 (20)	17					RPS6KB1
cyclopiazonic acid	chemical - endogenous non-mammalian		3	Inhibited		-2.294	7.56e-11	0.015	AHR,Akt,CASP3,CCND1,CEBPA,CEBPB,Creb,CREB1,CSF1,CSF2,cyclopiazonic acid,cytokine,DDIT3,EGFR,EIF2AK3,ELK1,ERN1,ESR1,HIF1A,HNF4A,HSF1,IKBKB,IL18,IL1B,IL6,IRF4,KAT5,KLF4,LIPE,MAPK1,MAPK3,MAPK8,MED1,NADPH oxidase,NCOA1,NCOA2,NCOA3,NFE2L2,NFkB (complex),NFKB1,NFKBIA,NR4A1,P38 MAPK,PKM,PLA2G4A,POU5F1,PPARG,PRKN,PTEN,RARA,REL,RELA,SERCA,SNAI1,SP1,STAT4,STK11,SYK,TOB1,TP53,TSC2,XBP1	ACOT1,APOE,ATP5F1C,ATP5PO,AVIL,CCT5,COX6B1,DNAJB1,DPP7,DSC1,ERP29,ERP44,FABP5,FKBP2,FUBP1,GLRX,GNB1,GSK3A,HINT1,HNRNPD,HSPA5,HSPE1,ILK,ITGA2B,KHSRP,MAPRE2,MIF,MINPP1,MMP25,MMRN1,MPDU1,MPPE1,NAP1L4,NAPA,NUCKS1,NUDC,NUDT21,OLR1,PABPC1,PEBP1,PGLS,PGP,PLEK,PLIN3,PPIA,PPIB,PSMD2,PSMD6,PXN,RAB43,RAB5B,RAB8A,RBM3,RBMX,RCSD1,RELA,RNASEL,RPL7,SAMD9,SEC23A,SET,SF1,SLC16A3,SLC44A2,SYNCRIP,SYTL1,TAGLN2,TBCB,…	76 (62)	57				EIF2AK3,IL5,PLA2G4A
VWF	other	-3.736	3	Inhibited		-3.212	7.76e-11	0.0056	5-hydroxytryptamine,ATF4,CCND1,CD247,CDK4/6,CEBPA,CREB1,CSF1,EGFR,EGR1,ESR1,F2,FCER1G,FOS,FOXC2,GLI1,HIF1A,HSF1,IGF1,IKZF1,IKZF3,ITGB3,KAT5,MAPK1,MYC,NCOA1,NCOA2,NR4A1,P38 MAPK,PKM,PLA2G4A,PLCG2,PRKCQ,PTEN,RARA,Smad2/3,SNAI1,STAT6,SYK,TGFB1,THBS1,TLR4,TOB1,TP53,TP63,VEGFA,VWF,ZAP70	ACOT1,ACTB,AHCY,CBFB,CCT3,CCT5,CD55,CD9,CORO1C,COX6B1,CYCS,DBI,DNM3,DPP7,DSC1,EIF4H,ERP29,FABP5,FCER1G,FKBP2,GLRX,GLRX5,GNB1,GSK3A,HNRNPA2B1,HNRNPC,HNRNPD,HNRNPH1,HNRNPH3,HSP90B1,HSPA5,HSPD1,HSPE1,ILK,ITGA2B,MYL12A,NAP1L4,NAPA,NUCKS1,NUDC,NUDT21,OLR1,P4HB,PABPC1,PEBP1,PGLS,PLEK,PPIA,PRKAR2B,PSMA2,PSMD2,PSMD6,RAB43,RAB5B,RAB8A,RAB8B,RBM3,RBMX,RCSD1,RELA,RPL7,S100A9,SAMD9,SET,SLC16A3,SLC44A2,SRI,SY…	76 (48)	42	EDN1,ERG,ETS,F2,F2R,GBP1,glycyrrhizic acid,NBEAL2,ristocetin,VIPAS39,VPS33B	B4GALNT2,BIRC5,FLT1,plicamycin,simvastatin		ITGA2B,PLA2G4A,SELP,YWHAZ	ANGPT2
vanadate	chemical - other		2	Inhibited		-3.221	7.91e-11	0.0185	Akt,EGFR,ERK1/2,INSR,JAK2,MAPK1,MAPK8,NFkB (complex),NFKB1,NFKBIA,PI3K (complex),STAT1,STAT5a/b,TP53,vanadate	ACTB,AHCY,ATP1A1,ATP5F1C,ATP5PO,B2M,CCT5,CNN3,CTSZ,CYCS,DBI,ERP29,FABP5,FCER1G,FKBP4,FUBP1,GSK3A,HNRNPA2B1,HNRNPD,HNRNPH1,HSPE1,ILK,KHSRP,LASP1,LTB4R,MAPRE2,MIF,MPDU1,MPPE1,NAP1L4,NUDC,P4HB,PABPC1,PDIA6,PPIA,PRKAR2B,PSMD2,PXN,RAB8A,RBM3,RPL7,SET,SLC16A3,SYTL1,TAGLN2,TUBB1,UBE2I,USO1,VWF,WIPF1,ZYX	51 (15)	14				CHEK1,EGFR,JUN,NFKB1,TP53	D-glucose,ESR1
PIK3C3	kinase		3			1.134	7.96e-11	0.0042	Cdc42,CREB1,EGFR,EIF4E,EIF4EBP1,ERBB2,HIF1A,HRAS,IGF1,JAK2,KRAS,MAPK1,MTOR,MTORC1,NFKBIA,PARP1,phosphatidylinositol,PIK3C3,Pld,PLD1,RELA,RICTOR,SP1,SREBF1,SREBF2,STAT3,STAT5B,STAT6,TFEB,TP53,WBP2,YAP1	ACOT1,ACTB,AHCY,ATP6AP1,AVIL,CCT5,CD9,CDC42,CNN3,CORO1C,COX6B1,CTSZ,DBI,ERP29,FKBP4,FUBP1,GNB1,GSK3A,HINT1,HNRNPA2B1,HNRNPD,HNRNPH1,HNRNPH3,HSP90B1,HSPA5,HSPD1,HSPE1,HUWE1,ILK,LTB4R,MAPRE2,MMP25,MMRN1,MPDU1,MT-CO2,NAP1L4,NUCKS1,NUDC,P4HB,PABPC1,PDIA6,PEBP1,PGP,PLEK,PPIA,PPIB,PSMC6,PSMD2,PSMD6,RAB8A,RBM3,RBMX,RELA,SEC23A,SEPTIN2,SET,STK4,SYTL1,TES,THBS1,TMOD3,USO1,ZYX	63 (32)	27	elaidic acid,TP53			C8orf44-SGK3/SGK3,MTORC1	EGFR
ARRB2	other	-1.1	2	Inhibited		-2.661	8.21e-11	0.0207	ADRB2,AGTR1,Akt,AKT1,ARRB2,CCR5,CTNNB1,EGFR,EIF4E,F2R,IGF1R,MAPK1,NFkB (complex),NOS2,P38 MAPK,Pka,RELA,TP53	ACTB,AHCY,ATP5F1C,ATP5PO,CCT5,CD55,CD9,CDC42,CNN3,CTSZ,CYCS,DBI,ERP29,FKBP4,FUBP1,GSK3A,HNRNPA2B1,HNRNPD,HNRNPH1,HNRNPM,HSP90B1,HSPE1,ILK,LASP1,LTB4R,MAPRE2,MPPE1,NAP1L4,NUDC,OLR1,P4HB,PABPC1,PDE4D,PDIA6,PLIN3,PPIA,PSMD2,RAB1B,RAB8A,RBM3,RPL7,SH3KBP1,SLC16A3,STK4,SYTL1,TAGLN2,UBE2I,UQCRC1,VWF,WIPF1,ZYX	51 (18)	17		ANGPT2,geldanamycin,levodopa,tanespimycin		EGFR,GRK5,HIF1A,IL13,IL4,RHOA	F2R,PLA2G4A
Pp1c	group		3			0.566	8.28e-11	0.0108	AKT1,BRCA1,Creb,CREB1,ERK1/2,MAP2,Map3k7,MAPK1,MAPK8,NEK2,NFkB (complex),NFKBIA,P38 MAPK,Pp1c,PPP1CA,PPP1CB,PPP1CC,Ppp1cc,PPP1R2,RAF1,RB1,TAZ,TP53	ACTB,AHCY,ALDOC,ATP5F1C,B2M,CD55,CD9,CDC42,CNN3,COX6B1,CTSZ,DBI,ERP29,FCER1G,FKBP4,FUBP1,GSK3A,HNRNPA2B1,HNRNPD,HNRNPM,HSPD1,ILK,LASP1,LTB4R,MAPRE2,MIF,MMP25,MPDU1,MT-CO2,NAP1L4,P4HB,PDIA6,PLIN3,PRKAR2B,PSMD2,PSMD6,PXN,RAB8A,RBM3,RBMX,RPL7,S100A9,SH3KBP1,SLC16A3,TAGLN2,UBE2I,UQCRC1,USO1,WIPF1,ZYX	50 (23)	16					MAP2
VPS35	transporter	1.125	3			1.386	8.3e-11	0.0251	Akt,AKT1,AR,BAX,BCL2L1,CD247,CD3,Creb,CREB1,EGFR,ERBB2,ESR1,HIF1A,IGF2R,JUN,MAPK1,MAPK7,NCOA2,NFkB (complex),NR4A1,PLG,RELA,SRC (family),SREBF2,STUB1,TGFB1,VPS35,ZAP70	ACOT1,ACTB,ALDOC,ATP1A1,ATP5F1C,ATP5PO,ATP6AP1,CBFB,CCT3,CD55,CD9,CNN3,CORO1C,COX6B1,CYCS,DBI,DNM3,DSC1,EIF4H,ERP29,FABP5,FKBP4,FUBP1,GNB1,GSK3A,GSTO1,HNRNPA2B1,HNRNPC,HNRNPM,HSPA5,HSPD1,HSPE1,ILK,LASP1,LTB4R,MIF,MMRN1,MPPE1,MT-CO2,MYL12A,NUCKS1,NUDC,P4HB,PABPC1,PDIA6,PGLS,PLIN3,PPIA,RAB5B,RBM3,RBMX,SAMD9,SLC16A3,SLC44A2,SRI,SYTL1,THBS1,TMOD3,TUBB1,UQCRC1,USO1,VPS4B,WIPF1	63 (28)	26	ESR1,IL4				IGF2R
Ctbp	group		2			-0.48	8.88e-11	0.0008	CDH1,CEBPA,Ctbp,CTBP1,NRIP1,TP53	ACTB,AHCY,APOE,ATP1A1,ATP5F1C,CNN3,CYCS,DBI,FABP3,FABP5,FKBP4,FUBP1,GLRX,GSK3A,HSPA5,HSPD1,ILK,ITGA2B,LASP1,LTB4R,MAPRE2,MMRN1,MT-CO2,NAP1L4,OLR1,P4HB,PDIA6,PSMD2,RAB8A,RBM3,RELA,RPL7,S100A9,TAGLN2,THBS1,UBE2I,UQCRC1,USO1,ZYX	39 (6)	5	SUMO-Ubc9 E2	Z-LLL-CHO		TP53	HEY1
magnesium sulfate	chemical drug		3	Activated		2.287	9.24e-11	0.0356	AHR,Akt,AKT1,APP,ATF2,CCND1,CEBPA,Creb,CSF2,CXCL12,cytokine,HIF1A,HNF4A,IL1B,IL6,IRF3,IRF4,JUN,magnesium sulfate,MAPK8,MMP9,MTOR,NFkB (complex),NFKB1,NFKBIA,P38 MAPK,PLAU,PPARG,REL,RELA,Tgf beta,TGFB1,TNF,TP53,VEGFA	ACOT1,ACTB,APOE,ATP5F1C,AVIL,CBFB,CCT5,CD9,CNN3,CORO1C,COX6B1,DNAJB1,EIF4H,FABP3,FABP5,FKBP2,FKBP4,FUBP1,GLRX,GSK3A,HNRNPA2B1,HNRNPC,HNRNPD,HNRNPH1,HNRNPM,HUWE1,KHSRP,MAPRE2,MIF,MINPP1,MMP25,MMRN1,MPDU1,MPPE1,MYL12A,NAP1L4,NUCKS1,OLR1,PDE4D,PDIA6,PLEK,PLIN3,PPIA,PSMA2,PSMD2,PXN,RAB8A,RBM3,RELA,RNASEL,RPL7,S100A9,SAMD9,SEPTIN7,SET,SF1,SH3KBP1,SLC16A3,SRI,STK4,SYTL1,TAGLN2,THBS1,TMOD3,TUBB1,UBE2I,U…	69 (35)	34
S-(2,3-bispalmitoyloxypropyl)-cysteine-GDPKHPKSF	chemical reagent		3	Inhibited		-2.287	9.51e-11	0.0348	AHR,Akt,AKT1,APP,ATF2,CCND1,CEBPA,Creb,CSF2,CXCL12,cytokine,HIF1A,HNF4A,IL1B,IL6,IRF3,IRF4,JUN,MAPK8,MMP9,MTOR,NFkB (complex),NFKB1,NFKBIA,P38 MAPK,PLAU,PPARG,REL,RELA,S-(2,3-bispalmitoyloxypropyl)-cysteine-GDPKHPKSF,Tgf beta,TGFB1,TNF,TP53,VEGFA	ACOT1,ACTB,APOE,ATP5F1C,AVIL,CBFB,CCT5,CD9,CNN3,CORO1C,COX6B1,DNAJB1,EIF4H,FABP3,FABP5,FKBP2,FKBP4,FUBP1,GLRX,GSK3A,HNRNPA2B1,HNRNPC,HNRNPD,HNRNPH1,HNRNPM,HUWE1,KHSRP,MAPRE2,MIF,MINPP1,MMP25,MMRN1,MPDU1,MPPE1,MYL12A,NAP1L4,NUCKS1,OLR1,PDE4D,PDIA6,PLEK,PLIN3,PPIA,PSMA2,PSMD2,PXN,RAB8A,RBM3,RELA,RNASEL,RPL7,S100A9,SAMD9,SEPTIN7,SET,SF1,SH3KBP1,SLC16A3,SRI,STK4,SYTL1,TAGLN2,THBS1,TMOD3,TUBB1,UBE2I,U…	69 (35)	34
heparin	chemical - endogenous mammalian		2			1.511	9.56e-11	0.0187	ADRB,Akt,AKT1,CDK2,CDKN1A,CXCL12,cytokine,EGFR,ERK1/2,F10,F2,FGF7,HBEGF,heparin,IL1,MAPK1,NFkB (complex),NFKBIA,P38 MAPK,SERPINC1,STAT1,STAT3,Tgf beta,TP53	ACTB,AHCY,APOE,APRT,ATP1A1,ATP5F1C,B2M,CCT5,CD9,CNN3,CORO1C,CTSZ,DBI,ERP29,FKBP4,FUBP1,GSK3A,GSTO1,HNRNPA2B1,HNRNPD,HNRNPH1,HNRNPM,HSPD1,HSPE1,ILK,LASP1,MAPRE2,MIF,MPDU1,MPPE1,NAP1L4,NUDC,OLR1,P4HB,PABPC1,PCYT1A,PDIA6,PPIA,PSMD2,PXN,RAB8A,RBM3,RPL7,S100A9,SEPTIN7,SLC16A3,TAGLN2,UBE2I,UQCRC1,USO1,VWF,WIPF1,ZYX	53 (24)	24				FLT1,FN1,Iti,SERPIND1,Thrombospondin	cholesterol,EGFR,F2,GRK5,MPO,reactive oxygen species,Serine Protease,TP53
silibinin	chemical drug		2			1.26	9.76e-11	0.015	AKR1C3,CASP8,CDK2,CHUK,EGFR,ERK1/2,IL1,MAPK1,MAPK8,MAPK9,NFkB (complex),RELA,silibinin,STAT1,STAT3,TCF7L2,TP53	ACTB,AHCY,ATP1A1,ATP5F1C,B2M,CCT5,CD55,CD9,CHMP1B,CNN3,CTSZ,DBI,DHRS7,ERP29,FKBP4,FUBP1,GSK3A,HNRNPA2B1,HNRNPD,HNRNPH1,HSP90B1,HSPD1,HSPE1,ILK,LASP1,LTB4R,MAPRE2,MIF,NAP1L4,NUDC,P4HB,PABPC1,PCYT1A,PDIA6,PPIA,PSMD2,PXN,RAB8A,RBM3,RPL7,S100A9,SH3KBP1,SLC16A3,STK4,SYTL1,TAGLN2,UBE2I,UQCRC1,USO1,WIPF1,ZYX	51 (17)	16				D-glucose,reactive oxygen species,TP53	AKR1C3,ANPEP,BIRC5,CCN2,CCNB1,CCNE1,cholesterol,Cyclin A,EGFR,FLT1,FN1,HIF1A,KLK3,MUC5AC,ZEB1
ethoxyquin	chemical toxicant		3			0.295	9.83e-11	0.0094	Akt,aristolochic acid I,CHUK,ERK1/2,ethoxyquin,GST,GSTO1,NFkB (complex),NFKBIA,NFKBIZ,NQO1,P38 MAPK,PARP1,PDK1,Pkc(s),tanespimycin,TP53	AHCY,ATP1A1,ATP5F1C,B2M,CD55,CD9,CNN3,CTSZ,CYCS,DBI,DNAJB1,FKBP4,FUBP1,GSK3A,HNRNPA2B1,HNRNPC,HNRNPM,HSP90B1,HSPD1,ILK,ITGA2B,LASP1,LTB4R,MAPRE2,MPDU1,MPPE1,MT-CO2,NAP1L4,OLR1,P4HB,PDIA6,PSMD2,PXN,RAB8A,RBM3,RBMX,RPL7,S100A9,SAMD9,SLC16A3,SLC44A2,TAGLN2,TMOD3,UQCRC1,USO1,ZYX	46 (17)	14				Cyp1a,CYP1A2,NQO1
L-leucine	chemical - endogenous mammalian		3			0.405	1.01e-10	0.0204	AKT1,Ap1,CCND1,CDKN1B,Creb,CREB1,HMGA1,L-leucine,MTOR,MTORC1,MYC,p70 S6k,PASK,PDX1,RELA,RICTOR,SREBF1,SREBF2,TFEB,TP53	ALDOC,APOE,ATP1A1,ATP5PO,ATP6AP1,AVIL,CCT3,CD9,CNN3,CYCS,DBI,FABP3,FCER1G,FKBP4,FUBP1,GLRX5,GSK3A,HNRNPA2B1,HNRNPD,HNRNPH1,HNRNPM,HSP90B1,HSPE1,ILK,ITGA2B,LTB4R,MAPRE2,MIF,NAP1L4,NUDT21,OLR1,P4HB,PDIA6,PGP,PLIN3,PPIA,PPIB,PSMA2,PSMC6,PSMD2,PSMD6,RAB8A,RBM3,RBMX,S100A9,SEPTIN2,SH3KBP1,SLC16A3,STK4,SYTL1,TES,TUBB1,UBE2I,UQCRC1,USO1	55 (20)	16	CA9			MTORC1
DNM2	enzyme	1.041	2			1.093	1.02e-10	0.0029	Akt,DNM2,EGFR,ERK1/2,SRF,TP53	ACTB,AHCY,APOE,ATP1A1,ATP5F1C,B2M,CCT5,CNN3,DBI,FABP5,FKBP4,FUBP1,GSK3A,HNRNPA2B1,HNRNPD,HNRNPH1,HSP90B1,HSPD1,HSPE1,ILK,ITGA2B,LASP1,LTB4R,MAPRE2,MPPE1,NAP1L4,NUDC,P4HB,PABPC1,PDIA6,PPIA,PSMD2,RAB8A,RBM3,RPL7,S100A9,TAGLN2,TMOD3,UQCRC1,USO1,ZYX	41 (6)	5	ABL1,PTPN11	ESR1		MTORC1,reactive oxygen species,TP53	EGFR
PS-K	chemical drug		3			-0.126	1.02e-10	0.0367	AHR,Akt,ATF2,CASP3,CASP8,CCND1,CEBPA,CSF2,cytokine,DICER1,HIF1A,HNF4A,IKBKB,IL18,IL1B,IL6,IRF3,IRF4,JUN,MAPK8,NFkB (complex),NFKB1,NFKBIA,NOS2,PARP1,PPARG,PRKN,PS-K,PTEN,REL,RELA,SP1,STAT1,STAT4,TP53	ACOT1,ACTB,APOE,ATP5F1C,ATP5PO,B2M,CD55,CYCS,DNAJB1,FABP3,FABP5,FCER1G,FKBP4,FUBP1,GLRX,GSK3A,HINT1,HNRNPA2B1,HNRNPH1,HSPD1,HUWE1,ILK,KHSRP,MAPRE2,MIF,MINPP1,MMP25,MMRN1,MPDU1,MPPE1,NAP1L4,NUCKS1,OLR1,PGP,PLEK,PLIN3,PPIA,PPIB,PRKAR2B,PSMA2,PSMD2,PXN,RAB43,RAB8A,RBM3,RELA,RPL7,S100A9,SEC23A,SET,SF1,SH3KBP1,SLC16A3,STK4,SYNCRIP,SYTL1,TAGLN2,TMOD3,TUBB1,UBE2I,UQCRC1,USO1,VWF	63 (35)	33
DNA-PK	complex		2			-1.286	1.04e-10	0.0101	Akt,AKT1,AKT3,DNA-PK,ESR1,IRF3,JUN,NCOA6,NFKB1,PDX1,TP53,VCP	ACTB,AHCY,ATP1A1,ATP5F1C,B2M,CDC42,CNN3,CYCS,DBI,DSC1,FABP5,FKBP4,FUBP1,GNB1,GSK3A,HNRNPA2B1,HNRNPD,HNRNPM,HSP90B1,HSPA5,HSPE1,ILK,ITGA2B,KHSRP,LASP1,LTB4R,MAPRE2,MPPE1,NAP1L4,OLR1,P4HB,PDIA6,PGLS,PSMD2,RAB5B,RAB8A,RBM3,RPL7,SAMD9,SLC16A3,SLC44A2,STK4,SYTL1,TAGLN2,TMOD3,UBE2I,UQCRC1,USO1,ZYX	49 (12)	11	ATR,dasatinib,EGFR,N-acetyl-L-cysteine	APP		AKT3,CHEK1,CHEK2,ESR1,NFKB1,RPA,TP53,VCP,WRN,XRCC6
3,4-dichloroisocoumarin	chemical - protease inhibitor		3			-0.367	1.04e-10	0.0144	26s Proteasome,3,4-dichloroisocoumarin,ADAM10,Akt,AKT1,APP,beta-estradiol,CASP3,CASP9,CDK2,CEBPB,EGFR,EIF2AK3,ELANE,ERN1,ESR1,F2R,fulvestrant,HSF1,IL18,IL1B,IREB2,NCOA1,NCOA2,NCOA3,NFkB (complex),PAK2,Pka,PRKAA1,PRKN,PTEN,RELA,SNAI2,STAT3,tamoxifen,TLR4,TP53	ACOT1,AHCY,ATP1A1,ATP5F1C,ATP6AP1,B2M,CCT3,CCT5,CD9,CDC42,CYCS,DNAJB1,DSC1,FABP3,FKBP4,FUBP1,GNB1,GSTO1,HNRNPA2B1,HNRNPM,HSPD1,HSPE1,LASP1,LTB4R,MAPRE2,MMRN1,MPPE1,NAP1L4,NAPA,NT5DC2,NUDC,NUDT21,P4HB,PABPC1,PCYT1A,PDE4D,PGLS,PLEK,PPIA,PPIB,PRKAR2B,PSMD2,PSMD6,RAB11FIP1,RAB43,RAB5B,RAB8A,RBM3,RELA,RNASEL,RPL7,S100A9,SAMD9,SEC23A,SET,SH3KBP1,SLC16A3,SLC44A2,SYNCRIP,SYTL1,TBCB,TUBB1,U2AF1/U2AF1L5,UB…	67 (37)	34				HSF1
vorinostat	chemical drug		2			1.116	1.07e-10	0.0318	Akt,AKT1,AR,ATF6,bortezomib,CDKN1A,dexamethasone,EIF2AK3,ERBB2,HIF1A,imatinib,JAK2,NFkB (complex),NFKBIA,RB1,RELA,SP1,SP3,STAT3,STAT5B,STAT6,tanespimycin,TP53,vorinostat	ACOT1,AHCY,ALDOC,ATP5F1C,ATP6AP1,CCT3,CD9,CDC42,COX6B1,CTSZ,DBI,DHRS7,DNAJB1,ERP29,FKBP2,FUBP1,GSK3A,GSTO1,HINT1,HNRNPA2B1,HNRNPC,HNRNPH1,HNRNPH3,HNRNPM,HSP90B1,HSPA5,HSPE1,HUWE1,ILK,KHSRP,LASP1,MAPRE2,MMRN1,MPDU1,MPPE1,NAP1L4,NAPA,NUCKS1,P4HB,PABPC1,PCYT1A,PDE4D,PLEK,PPIA,PSMA2,PSMC6,PSMD2,PSMD6,RAB8A,RBM3,RBMX,RELA,RNASEL,RPL7,S100A9,SET,SH3KBP1,SLC16A3,STK4,SYTL1,TAGLN2,TES,USO1,VAPB,ZYX	65 (24)	24				bortezomib,EIF2AK3,JUN,mir-1,miR-1-3p (and other miRNAs w/seed GGAAUGU),mir-542,MLH1,NDRG1,reactive oxygen species,tanespimycin,TNFSF10,TRAF4,TXN	AURK,AURKA,BCR-ABL1,BIRC5,CCNB1,CD8A,CHEK2,cholesterol,EDN1,EGFR,HIF1A,KAT5,mir-10,mir-515,NFE2,RGS2,SREBF1,TP53
SCNN1B	ion channel		3			-0.651	1.11e-10	0.0161	ADRB2,AKT1,AR,BMP7,CFTR,ERBB3,IGF1R,NEDD4,Nedd4,NEDD4L,NFkB (complex),NFKBIA,NR3C1,PIK3R1,PTEN,RELA,SCNN1B,SMAD3,SOX2,STAT3,TGFB1,TGFBR1,TP53,TP73,VHL,WWP2	ACTB,AHCY,ATP1A1,ATP5F1C,ATP5PO,ATP6AP1,CBFB,CCT3,CCT5,CD55,CDC42,CORO1C,COX6B1,CTSZ,CYCS,DBI,EIF4H,FABP5,FCER1G,FKBP2,FUBP1,GSK3A,HINT1,HNRNPA2B1,HNRNPC,HNRNPM,HSPD1,ITGA2B,LASP1,LTB4R,MAPRE2,MPDU1,MYL12A,NAP1L4,OLR1,P4HB,PDE4D,PDIA6,PPIA,PSMD2,RAB1B,RAB43,RAB8A,RBM3,RPL7,SEC23A,SEPTIN2,SH3KBP1,SLC16A3,SRI,STK4,SYNCRIP,SYNE2,SYTL1,TAGLN2,THBS1,TMOD3,USO1,ZYX	59 (26)	21	RHOA	actinomycin D,budesonide,EDN1,Insulin		Na+
POU2F1	transcription regulator		3			-1.664	1.13e-10	0.0097	Akt,AR,ATF2,BRCA1,ERK1/2,ERN1,GADD45A,JUN,MAPK8,MMP3,MTOR,POU2F1,SMAD2,SP1,TGFB1,TGFBR1,TP53	ACTB,AHCY,ATP1A1,ATP5F1C,ATP6AP1,AVIL,B2M,CBFB,CCT3,CCT5,CORO1C,COX6B1,DBI,EIF4H,FABP5,FKBP2,FUBP1,GSK3A,HNRNPA2B1,HNRNPC,HNRNPD,HNRNPH1,HSPD1,ITGA2B,LASP1,MAPRE2,MIF,MPPE1,MYL12A,NAP1L4,NUDT21,P4HB,PCYT1A,PDE4D,PDIA6,PGP,PPIA,PPIB,PRKAR2B,PSMD2,PXN,RAB8A,RBM3,RPL7,SLC16A3,SRI,SYNCRIP,TAGLN2,TBCB,THBS1,TMOD3,UQCRC1	52 (17)	15	rosiglitazone			ESR1,KLK3	CYP2C9,reactive oxygen species
proTAME	chemical reagent		3			-0.516	1.13e-10	0.0264	26s Proteasome,Akt,AKT1,AURKA,BCL2L1,BIRC5,BRCA1,CTNNB1,ERK1/2,ESR1,HSF1,IRF3,MYC,NFkB (complex),NFKBIA,PLK1,proTAME,PTEN,RASSF1,SDCBP,SNCA,SRC (family),STAT3,TP53,TP63	ACTB,ATP1A1,ATP5F1C,ATP5PO,B2M,CCT5,CD9,CDC42,COX6B1,CTSZ,CYCS,DBI,DNAJB1,DSC1,FABP5,FCER1G,GLRX5,GNB1,GSK3A,HNRNPD,HNRNPH1,HNRNPM,HSP90B1,HSPE1,ILK,ITGA2B,KHSRP,LASP1,LTB4R,MAPRE2,MIF,MPDU1,MPPE1,NAP1L4,OLR1,P4HB,PDIA6,PEBP1,PGLS,PLIN3,PPIA,PSMD2,PSMD6,RAB43,RAB5B,RAB8A,RBM3,RPL7,SAMD9,SEC23A,SLC44A2,SYNCRIP,TES,TMOD3,TUBB1,UQCRC1,USO1,VWF,WIPF1,ZYX	60 (25)	22				AURKA,CCNB1,PLK1,PTTG1
NEK8	kinase	-1.198	3			0.98	1.14e-10	0.0186	APC,Cdk,CDK19,CEBPB,CTNNB1,Cyclin A,E2F1,E2F3,MYC,NEK8,NRF1,RB1,SP1,TP53	ALDOC,APOE,ATP5F1C,ATP5PO,B2M,CCT3,CD55,CD9,CNN3,DBI,EIF3I,FABP5,FCER1G,FKBP4,FUBP1,GLRX5,GSK3A,HINT1,HNRNPA2B1,HNRNPD,HNRNPH1,HSP90B1,HSPE1,ILK,ITGA2B,LASP1,MAPRE2,MIF,NAP1L4,NUCKS1,NUDC,NUDT21,OLR1,P4HB,PCYT1A,PDIA6,PLIN3,PPIA,PRKAR2B,PSMC6,PSMD2,PSMD6,RAB8A,RBM3,RELA,RPL7,SLC16A3,TES,UBE2I,UQCRC1,USO1	51 (14)	12	HIF1A				Cyclin A
fisetin	chemical drug		2			1.443	1.17e-10	0.0107	Akt,fisetin,JUN,MAPK8,MMP3,NFkB (complex),NFKBIA,P38 MAPK,PLAU,RELA,STAT6,TP53,TSC2	ACTB,AHCY,ATP1A1,ATP5F1C,B2M,CD55,CNN3,CTSZ,CYCS,DBI,DPP7,FCER1G,FKBP4,FUBP1,GSK3A,HNRNPA2B1,HNRNPH3,HSP90B1,HSPD1,ILK,ITGA2B,LASP1,LTB4R,MAPRE2,MIF,MPDU1,MPPE1,MT-CO2,NAP1L4,NUDT21,P4HB,PDIA6,PSMD2,PXN,RAB8A,RBM3,RPL7,S100A9,SH3KBP1,SLC16A3,STK4,SYNCRIP,SYTL1,TAGLN2,TES,UQCRC1,USO1,ZYX	48 (13)	12				TP53	BIRC5,IL13,IL4,JUN
DNAJA3	other		2			1.64	1.21e-10	0.0099	Akt,DNAJA3,EGFR,ERK,ERK1/2,NFkB (complex),NFKBIA,STAT3,TP53	ACTB,AHCY,ATP1A1,ATP5F1C,B2M,CCT5,CD9,CNN3,CTSZ,DBI,FCER1G,FKBP4,FUBP1,GSK3A,HNRNPA2B1,HNRNPD,HNRNPH1,HSP90B1,HSPD1,HSPE1,ILK,ITGA2B,LASP1,LTB4R,MAPRE2,MPDU1,MPPE1,NAP1L4,NUDC,OLR1,P4HB,PABPC1,PDIA6,PPIA,PSMD2,PXN,RAB8A,RBM3,RPL7,SLC16A3,TAGLN2,UQCRC1,USO1,WIPF1,ZYX	45 (9)	8					EGFR
1,2-dithiol-3-thione	chemical reagent		3			0.405	1.22e-10	0.007	1,2-dithiol-3-thione,26s Proteasome,Akt,aristolochic acid I,beta-estradiol,EGFR,EIF2AK3,ERN1,ESR1,fulvestrant,glutathione peroxidase,GPX1,GPX4,GPX5,IREB2,NCOA1,NCOA2,NFKBIA,NQO1,PARP1,PDK1,Pka,RELA,STAT3,tamoxifen,tanespimycin	ACOT1,ATP1A1,ATP6AP1,CCT3,CCT5,CD9,CDC42,CYCS,DNAJB1,DSC1,ERP29,ERP44,FABP3,GLRX,GNB1,GSTO1,HNRNPA2B1,HNRNPC,HNRNPD,HNRNPH1,HNRNPM,HSP90B1,HSPE1,MMRN1,MPDU1,MPPE1,NAPA,NT5DC2,NUDC,PABPC1,PDE4D,PDIA6,PGLS,PPIA,PPIB,PSMA2,PSMC6,PSMD2,PSMD6,RAB11FIP1,RAB5B,RBMX,RNASEL,SAMD9,SEC23A,SET,SH3KBP1,SLC44A2,SYTL1,TBCB,TMOD3,U2AF1/U2AF1L5,UBE2I,USO1,VWF	55 (26)	24				arginase,CD8B,COPS5,glutathione peroxidase,HSP90B1,NQO1,PDIA6,PSMC3,PSMD1,PSMD3,PSMD4,TXN,TXNRD1,VCP,XBP1	reactive oxygen species,SERPIND1,SREBF1
PICK1	enzyme		3			-0.849	1.27e-10	0.0187	26s Proteasome,ADCY,Akt,AKT1,BAK1,BAX,CASP8,CCNE1,CTNNB1,EGFR,ERK1/2,GRM7,IKBKG,MAPK8,NFkB (complex),PICK1,Pka,PRKN,RELA,SEPTIN5,TFEB,TP53	ACTB,AHCY,ATP1A1,ATP5PO,B2M,CCT5,CNN3,CTSZ,DBI,FKBP4,FUBP1,GSK3A,HNRNPA2B1,HNRNPD,HNRNPM,HSPD1,HSPE1,ILK,ITGA2B,LASP1,LTB4R,MAPRE2,MIF,MPPE1,NAP1L4,NUDC,P4HB,PABPC1,PCYT1A,PDE4D,PDIA6,PLIN3,PPIA,PSMD6,PXN,RAB8A,RBM3,RPL7,S100A9,SEPTIN2,SEPTIN7,SH3KBP1,SLC16A3,STK4,SYTL1,TAGLN2,UBE2I,UQCRC1,USO1,ZYX	50 (22)	20	SREBF1			Insulin	D-glucose,PRKN
NFAT (complex)	complex		3			-1.807	1.34e-10	0.0336	AKT1,CASP8,ERK1/2,ESR1,ESR2,FOXO1,HRAS,IL5,JAK2,JUN,MAPK1,NFAT (complex),NFAT5,NFATC1,NFATC2,NFATC3,NFATC4,NFkB (complex),P38 MAPK,PI3K (complex),SOX4,STAT1,STAT5a/b,STAT5B,SYK,TP53	ACOT1,AHCY,ALDOC,ATP1A1,ATP5F1C,B2M,CCT3,CD55,CD9,CDC42,CNN3,CYCS,DSC1,ERP29,FABP3,FABP5,FKBP4,FUBP1,GSK3A,HNRNPD,HNRNPM,HSP90B1,HSPA5,HSPD1,ILK,MAPRE2,MIF,MMRN1,MYL12A,NAP1L4,P4HB,PABPC1,PCYT1A,PDIA6,PGLS,PRKAR2B,PSMD2,PXN,RAB5B,RAB8A,RBM3,RCSD1,RPL7,S100A9,SAMD9,SET,SLC16A3,SLC44A2,SRI,STK4,SYNCRIP,TAGLN2,TES,THBS1,TMOD3,TUBB1,UBE2I,UQCRC1,USO1,ZYX	60 (26)	22	APP,CCN2,CD28,CD3,IGF2R,mir-10,OXT,PLCG1,TCR,TSH	CRYAB,curcumin,cyclosporin A,mir-515,N-acetyl-L-cysteine,PRKG1		IL4,IL5
AKR1C3	enzyme		3			-0.882	1.37e-10	0.0308	AKR1C3,Akt,AKT1,AR,CCNE1,Creb,CREB1,CREBBP,EGFR,EP300,ERBB2,ESR1,HIF1A,HIPK2,MAPK1,MAPK7,NCOA2,NFkB (complex),NR4A1,Pka,RELA,SIAH2,SNCA,SREBF2,STUB1,TP53	ACOT1,ACTB,AHCY,ALDOC,ATP5F1C,ATP5PO,ATP6AP1,AVIL,B2M,CCT3,CCT5,CD9,CNN3,COX6B1,DNM3,DSC1,ERP29,FABP5,FKBP4,FUBP1,GNB1,GSK3A,GSTO1,HNRNPA2B1,HNRNPH1,HNRNPM,HSPA5,HSPE1,HUWE1,ILK,LASP1,LTB4R,MAPRE2,MIF,MPPE1,MT-CO2,NAP1L4,NUCKS1,NUDC,P4HB,PABPC1,PCYT1A,PDE4D,PDIA6,PGLS,PLIN3,PPIA,PRKAR2B,PSMD2,PXN,RAB5B,RAB8A,RBM3,RBMX,RPL7,SAMD9,SLC16A3,SLC44A2,SYTL1,THBS1,TMOD3,USO1,WIPF1	63 (26)	25		apigenin,E2F3,HEXIM1,LGR5,naringenin,PRL,silibinin
RPL11	other	-2.131	2			1.677	1.39e-10	0.0068	MYC,RPL11,TP53	ACTB,AHCY,APOE,ATP1A1,ATP5F1C,CCT3,CNN3,COX6B1,CYCS,FKBP4,FUBP1,GLRX5,GSK3A,HNRNPA2B1,HNRNPD,HNRNPH1,HSPA5,HSPD1,HSPE1,ILK,ITGA2B,LASP1,LTB4R,MAPRE2,MIF,MT-CO2,NAP1L4,NUDT21,OLR1,P4HB,PDIA6,PPIA,PSMD2,RAB8A,RBM3,SLC16A3,TAGLN2,TES,THBS1,UBE2I,UQCRC1,USO1,ZYX	43 (3)	2	MLXIPL	5-fluorouracil,CD 437,RICTOR		TP53
tirapazamine	chemical drug		3			-1.732	1.4e-10	0.0082	Akt,BIRC5,BRCA1,CDK2,CDKN1A,CHEK1,CHEK2,cytarabine,E2F1,E2F3,EGFR,MDM4,P38 MAPK,PKM,RASSF1,RB1,RELA,STAT3,tirapazamine,TOP2B,TP53	AHCY,APOE,ATP5F1C,CCT5,CD55,CNN3,COX6B1,DBI,EIF3I,FABP5,FCER1G,FKBP4,FUBP1,GSK3A,GSTO1,HNRNPA2B1,HNRNPD,HNRNPH1,HSP90B1,HSPD1,ITGA2B,LASP1,LTB4R,MAPRE2,MIF,MPPE1,NAP1L4,NUCKS1,P4HB,PABPC1,PCYT1A,PDIA6,PGLS,PPIA,PXN,RAB8A,RBM3,RPL7,SH3KBP1,STK4,SYTL1,TAGLN2,TUBB1,UQCRC1,USO1,VWF,WIPF1,ZYX	48 (21)	17				CHEK1,CHEK2,reactive oxygen species,TP53	Top2
TMSB10/TMSB4X	other		3			-0.254	1.4e-10	0.0414	AHR,AKT1,ATF2,CCND1,CEBPA,CSF2,cytokine,ERK1/2,HIF1A,HNF4A,IGF1R,IKBKB,IL1B,IL6,IRF3,IRF4,JUN,MAPK8,MMP3,MMP7,NFkB (complex),NFKB1,NFKBIA,NOS2,PPARG,REL,RELA,SP1,STAT1,STAT4,TMSB10/TMSB4X,TP53	ACOT1,ACTB,APOE,ATP5F1C,ATP5PO,B2M,CD55,CDC42,CNN3,CYCS,DNAJB1,FABP3,FABP5,FCER1G,FKBP4,FUBP1,GLRX,GSK3A,HINT1,HNRNPA2B1,HNRNPM,HSPD1,HUWE1,ILK,KHSRP,MAPRE2,MIF,MINPP1,MMP25,MMRN1,MPDU1,NAP1L4,NUCKS1,NUDT21,OLR1,PDIA6,PGP,PLEK,PLIN3,PPIA,PPIB,PRKAR2B,PSMA2,PSMD2,PXN,RAB8A,RBM3,RELA,RPL7,S100A9,SF1,SH3KBP1,SLC16A3,STK4,SYNCRIP,SYTL1,TAGLN2,TUBB1,UBE2I,UQCRC1,USO1,VWF	62 (32)	30	5-fluorouracil,ADCYAP1,cyclosporin A,puromycin aminonucleoside,TP53	CD 437,methylprednisolone,miR-1-3p (and other miRNAs w/seed GGAAUGU),ST1926
HOXA1	transcription regulator		3	Inhibited		-2.138	1.4e-10	0.0179	AKT1,EGFR,ESR1,ESR2,estrogen receptor,HNF4A,HOXA1,PI3K (complex),PPARA,PPARG,PRL,RELA,STAT1,STAT4,STAT5A,STAT5B,TP53	ACOT1,ALDOC,ATP1A1,ATP5F1C,ATP5PO,CCT3,CCT5,CD9,CDC42,CTSZ,CYCS,DSC1,FABP3,FCER1G,FKBP4,FUBP1,GNB1,GSK3A,HNRNPA2B1,HNRNPD,HNRNPH1,HNRNPM,HSPD1,HSPE1,ILK,LASP1,MAPRE2,MMRN1,MT-CO2,MYL12A,NAP1L4,NUDC,P4HB,PABPC1,PDIA6,PGLS,PGP,PLIN3,PPIA,PRKAR2B,PSMD2,RAB5B,RAB8A,RBM3,RELA,RPL7,S100A9,SH3KBP1,SLC44A2,SYNCRIP,SYTL1,TAGLN2,TMOD3,UBE2I,USO1,VWF	56 (17)	15		mir-10
DGKQ	kinase		3			0	1.41e-10	0.0139	AHR,Akt,AKT1,AKT3,DGKQ,L-tyrosine,MAPK1,MTOR,MTORC2,PI3K (complex),Pkc(s),RICTOR,TP53	AHCY,APOE,ATP1A1,ATP5PO,ATP6AP1,AVIL,CD55,CNN3,COX6B1,CYCS,DBI,DNAJB1,ERP29,FKBP4,FUBP1,GSK3A,HNRNPM,HSP90B1,HSPE1,ILK,ITGA2B,LASP1,LTB4R,MAPRE2,MMP25,MPPE1,NAP1L4,P4HB,PDIA6,PGP,PPIB,PRKAR2B,PSMA2,PSMC6,PSMD2,PSMD6,PXN,RAB8A,RBM3,SLC16A3,TAGLN2,UBE2I,UQCRC1,USO1,WIPF1,ZYX	46 (13)	10	F2,SREBF1				MTORC2
Cry-Period	complex		3	Activated		2.402	1.43e-10	0.0022	ARNTL,CLOCK,Cry-Period,CRY1,CRY2,Cryptochrome,HIF1A,MYC,NR3C1,PER1,PER2,PER3,PPARG	ACTB,AHCY,ALDOC,APOE,ATP1A1,B2M,CBFB,CCT3,COX6B1,CYCS,DBI,FABP3,FABP5,FCER1G,FKBP4,GLRX5,HNRNPA2B1,HNRNPD,HNRNPH1,HSPA5,HSPD1,HSPE1,HUWE1,ITGA2B,MIF,NUCKS1,NUDT21,OLR1,PLIN3,PPIA,PRKAR2B,RPL7,S100A9,SEC23A,SLC16A3,TAGLN2,TES,UBE2I,UQCRC1	39 (13)	8
MTORC1	complex		2			1.732	1.45e-10	0.0126	Akt,AKT1,AMPK,CCND1,CDKN1B,Creb,MTOR,MTORC1,RELA,RICTOR,SREBF1,SREBF2,TFEB,TP53	AHCY,ALDOC,APOE,ATP1A1,ATP5PO,ATP6AP1,AVIL,CNN3,COX6B1,CYCS,DBI,FABP3,FCER1G,FKBP4,FUBP1,GSK3A,HNRNPM,HSP90B1,HSPA5,ILK,ITGA2B,LTB4R,MAPRE2,MPPE1,MT-CO2,NAP1L4,OLR1,P4HB,PDIA6,PGP,PLIN3,PPIB,PSMA2,PSMC6,PSMD2,PSMD6,RAB8A,RBM3,S100A9,SH3KBP1,SLC16A3,STK4,SYTL1,TAGLN2,TUBB1,UQCRC1,USO1,ZYX	48 (14)	13	anisomycin,arsenite,cadmium,CD28,CSNK2B,D-glucose,DNM2,EDN1,Immunoglobulin,Insulin,L-leucine,NSC 126405,PIK3C3,SLC7A5,TCR,TSH	2-amino-2-norbornanecarboxylic acid,ABTL0812,BI 860585,bortezomib,DDIT4,DS-3078a,FKBP1A,LXI-15029,OSI-027,SMAD7,temozolomide,temsirolimus,thapsigargin,tunicamycin		AHR,HK2,IL4,INSIG1,Nedd4,NFIL3,RHOA,RICTOR,RORC,SREBF1,SREBF2,TP53	MTORC2
gilteritinib	chemical drug		3	Activated		2.566	1.46e-10	0.0224	Akt,AKT1,ALK,AXL,CASP8,CCND1,CEBPB,CHUK,Creb,CREB1,DUSP1,EDN1,EGFR,EIF4E,ERK,ESR1,FLT3,FOS,gilteritinib,IDH2,MAPK1,MAPK7,MTOR,MYC,MYCN,NCOA2,NFkB (complex),NFKBIA,P38 MAPK,PPARG,RELA,SMAD4,SP1,SRF,STAT5a/b,STAT6,STIM1,TLR3,TOB1,TP53,TP73,YAP1	ACOT1,ALDOC,ATP1A1,ATP5F1C,ATP5PO,CBFB,CCT3,CCT5,CNN3,COX6B1,CTSZ,DBI,DSC1,ERP29,FKBP4,FUBP1,GLRX3,GLRX5,GNB1,GSK3A,GSTO1,HINT1,HNRNPD,HNRNPH1,HNRNPH3,HNRNPM,HSPE1,HUWE1,ILK,ITGA2B,MIF,MMP25,MPDU1,MPPE1,NAP1L4,NUDC,NUDT21,P4HB,PABPC1,PDIA6,PEBP1,PGLS,PGP,PLIN3,PPIA,PPIB,PSMA2,PSMD2,PXN,RAB5B,RAB8A,RBM3,RBMX,RELA,RPL7,S100A9,SAMD9,SLC44A2,STK4,SYNE2,SYTL1,THBS1,TMOD3,TUBB1,UBE2I,UQCRC1,WIPF1	67 (42)	40
CHEK2	kinase		2			0.801	1.52e-10	0.0022	BIRC5,BRCA1,CDK2,CHEK2,E2F1,E2F3,MDM4,PKM,RB1,TP53	ACTB,AHCY,APOE,ATP5F1C,CNN3,COX6B1,DBI,EIF3I,FABP5,FKBP4,FUBP1,GSK3A,HNRNPD,HSP90B1,HSPA5,HSPD1,HSPE1,ITGA2B,LASP1,LTB4R,MAPRE2,MT-CO2,NAP1L4,NUCKS1,NUDC,OLR1,P4HB,PCYT1A,PDIA6,PGLS,RAB8A,RBM3,RPL7,TAGLN2,TUBB1,UQCRC1,USO1,VWF,ZYX	39 (10)	9	10-(6'-ubiquinonyl)decyltriphenylphosphonium,arsenic trioxide,ATM/ATR,ATR,bortezomib,CELF2,DNA-PK,Immunoglobulin,KAT5,MAPK12,MCRS1,MLH1,NABP1,RABL6,rigosertib,temozolomide,tirapazamine,Ubiquitin	caffeine,CDK5RAP3,CHEK1,docetaxel,ESR1,GMNN,mir-34,N-acetyl-L-cysteine,PPM1D,RICTOR,Top2,TOPBP1,vorinostat,Z-LLL-CHO		BIRC5,MDC1,TRIM28,TTK	AURKA,E2F3
cadmium	chemical toxicant		2	Inhibited		-3.434	1.53e-10	0.022	Akt,cadmium,E2F1,ERN1,ESR1,MAPK1,NFE2L2,P38 MAPK,RAF1,TP53,TXN	AHCY,ATP1A1,ATP5F1C,B2M,CCT3,CD55,CD9,CDC42,CNN3,DBI,DSC1,EIF3I,FABP5,FKBP4,FUBP1,GNB1,GSK3A,GSTO1,HNRNPA2B1,HNRNPD,HSPA5,HSPE1,ILK,LASP1,LTB4R,MAPRE2,MIF,MPPE1,NAP1L4,NUDC,OLR1,P4HB,PDIA6,PGLS,PPIB,PSMD2,PSMD6,RAB5B,RAB8A,RBM3,RPL7,SAMD9,SEC23A,SLC16A3,SLC44A2,STK4,TAGLN2,TBCB,TMOD3,UBE2I,UQCRC1,WIPF1,ZYX	53 (11)	11				ascorbic acid,ERN1,ESR1,IGF2R,JUN,MTORC1,reactive oxygen species,TP53	glutathione peroxidase,HIF1A,IL4,TXN,TXNRD1,UBE2D1
PSMD4	other		2			-0.973	1.54e-10	0.0019	NFKB1,PSMD4,RELA,TP53	AHCY,ATP1A1,ATP5F1C,B2M,CNN3,DBI,FABP5,FKBP4,FUBP1,GSK3A,HSP90B1,HSPA5,HSPD1,ILK,ITGA2B,KHSRP,LASP1,LTB4R,MAPRE2,MT-CO2,NAP1L4,OLR1,P4HB,PDIA6,PSMD2,PXN,RAB8A,RBM3,RELA,RPL7,SH3KBP1,STK4,SYTL1,TAGLN2,THBS1,UQCRC1,USO1,ZYX	38 (4)	3	1,2-dithiol-3-thione,bortezomib	NMS-873,RICTOR,UBE2D1,UBE2D2		NFKB1	TP53
dasatinib	chemical drug		2			0.866	1.57e-10	0.0181	Akt,CASP8,dasatinib,EGFR,ERK1/2,GIT1,JAK2,JUN,P38 MAPK,PLCG2,STAT3,STAT5a/b,SYK,TP53	ACTB,AHCY,ATP5F1C,B2M,CCT5,CD55,CD9,CNN3,CYCS,DBI,FABP5,FKBP4,FUBP1,GSK3A,HNRNPD,HNRNPH1,HSP90B1,HSPA5,HSPD1,HSPE1,ILK,LASP1,LTB4R,MAPRE2,MIF,MPPE1,NAP1L4,NUDC,P4HB,PABPC1,PDIA6,PPIA,PRKAR2B,PSMD2,PXN,RAB8A,RBM3,RCSD1,RPL7,S100A9,SET,TAGLN2,TUBB1,UQCRC1,USO1,VWF,WIPF1,ZYX	48 (14)	13				DNA-PK,reactive oxygen species,SREBF1,TP53	ABL1,BCR-ABL1,BTK,CBL,CCN2,EGFR,FN1,FYN,GIT1,JUN
Actin	group		2			0.316	1.62e-10	0.0045	ACTG1,Actin,FGF2,MAPK8,MRTFA,TP53,VEGFA	ACTB,AHCY,APOE,ATP1A1,ATP5F1C,ATP5PO,B2M,CBFB,CD55,CNN3,COX6B1,DBI,FABP3,FABP5,FKBP4,FUBP1,GSK3A,HSPA5,HSPD1,ILK,ITGA2B,LASP1,LTB4R,MAPRE2,MIF,MT-CO2,NAP1L4,P4HB,PDIA6,PSMD2,RAB8A,RBM3,RELA,RPL7,S100A9,SET,TAGLN2,UQCRC1,USO1,ZYX	40 (7)	6	ANGPT2,ATE1,CD28,CD3,Insulin,PDGF (family)	5-hydroxytryptamine,caffeine,cyclosporin A
APP	other		2			-1.807	1.67e-10	0.0373	26s Proteasome,APP,Ca2+,Cdc42,CDKN1A,COPS5,Creb,EIF2AK3,FOS,HIF1A,IGF1R,IKBKB,INSR,JUN,MAPK1,MTOR,NFkB (complex),NFKBIA,PARP1,PI3K (complex),Pka,RAF1,RB1,RELA,SREBF2,STAT3,SYK,TLR2,TLR4,TP53,TP73,TSC2	ACTB,AHCY,APOE,APRT,ATP5F1C,AVIL,CD9,CDC42,CNN3,COX6B1,CTSZ,DPP7,ERP29,FKBP4,FUBP1,GSK3A,GSTO1,HNRNPA2B1,HNRNPD,HSPA5,HSPD1,HUWE1,ILK,LASP1,LTB4R,MPDU1,NAP1L4,NAPA,NUCKS1,OLR1,P4HB,PCYT1A,PDE4D,PDIA6,PEBP1,PGP,PLEK,PLIN3,PPIA,PPIB,PSMA2,PSMD6,PXN,RAB8A,RBM3,RCSD1,RELA,RNASEL,RPL7,SH3KBP1,STK4,SYNCRIP,SYNE2,SYTL1,TAGLN2,TMOD3,TNPO2,UBE2I,VWF,ZYX	60 (32)	32	ABL1,ADORA2A,ALOX5,anisomycin,celecoxib,clioquinol,D-glucose,DNMT3B,FSH,lactacystin,linoleic acid,metribolone,pravastatin,PRL,PSEN2,PSENEN,Z-LLL-CHO	24-hydroxycholesterol,3K3A-APC protein,actinomycin D,AHR,APOA1,capsaicin,Congo Red,curcumin,cyanocobalamin,cyclosporin A,ESR1,GABA,GRK5,IgG,Insulin,ITM2B,mir-515,N-(6,6-dimethyl-5-((1-methylpiperidin-4-yl)carbonyl)-1,4,5,6-tetrahydropyrrolo(3,4-c)pyrazol-3-yl)-3-methylbutanamide,sertindole,SGPL1,simvastatin,SNX27,SYVN1,triflusal,UBQLN1,VPS26A,XBP1		APH1B,CCNE1,CDC14A,COPS5,CYBB,Cyclin A,DPYSL2,EDN1,EIF2A,EIF2AK3,FLT1,FYN,glutathione peroxidase,HEY1,HIF1A,ID1,IFI16,Igtp,IL13,IL5,IRGM,MAP2,mir-10,NFAT (complex),PLA2G4A,reactive oxygen species,RHOA,SMAD7,TNFSF10	ACTN2,CSNK2A2,CXCR4,DNA-PK,DNM1L,EGFR,HSPA1A/HSPA1B,KLK3,MDK,MTOR,NEUROG1,pregnenolone,SREBF2
growth factor	group		2	Inhibited		-2.496	1.69e-10	0.0337	Akt,BAX,EGF,EGFR,ERBB2,ERK1/2,FGF2,FOXO3,growth factor,IGF1,JUN,MAP2K1,NFkB (complex),PDGFB,PI3K (complex),SRC (family),STAT3,TGFB1,TSC1,TSC2,VEGFA	ACTB,ALDOC,ATP1A1,ATP5PO,B2M,CBFB,CCT5,CDC42,CNN3,CORO1C,COX6B1,CYCS,DPP7,EIF4H,FABP5,FCER1G,FKBP2,FUBP1,GLRX,HINT1,HNRNPC,HNRNPD,HNRNPH1,HSPE1,ILK,ITGA2B,LASP1,MPPE1,MYL12A,NUDC,OLR1,PABPC1,PDE4D,PDIA6,PEBP1,PLEK,PPIA,PPIB,PRKAR2B,PXN,RBM3,S100A9,SEC23A,SET,SF1,SLC16A3,SRI,TMOD3,USO1,VWF,WIPF1,ZYX	52 (21)	20				EGFR,ERBB4,JUN,PTPN11,reactive oxygen species
curcumin	chemical drug		2			0.124	1.73e-10	0.0476	26s Proteasome,AHR,Akt,APP,ATF3,BAX,CASP8,CHUK,Creb,curcumin,DDIT3,EGFR,ERBB2,ERK,ERN1,FASN,IDH2,IKBKB,IRF3,JAK2,JUN,LIPE,MAPK1,Mek,MTOR,NFE2L2,NFkB (complex),NFKB1,NFKBIA,PI3K (complex),PI3K (family),PPARG,RELA,STAT3,TLR2,TLR4,TNF,TP53,VEGFA	AHCY,ALDOC,APOE,ATP5F1C,AVIL,CBFB,CCT3,CCT5,CD9,CDC42,CNN3,CTSZ,DNAJB1,ERP29,FABP3,FKBP4,FUBP1,GSK3A,GSTO1,HINT1,HNRNPA2B1,HNRNPD,HNRNPH1,HSP90B1,HSPD1,HSPE1,ITGA2B,KHSRP,LTB4R,MAPRE2,MMP25,MPDU1,MPPE1,NAP1L4,NUDC,OLR1,PABPC1,PCYT1A,PDIA6,PEBP1,PGP,PLEK,PLIN3,PPIB,PRKAR2B,PSMA2,PSMD6,PXN,RAB8A,RBM3,RELA,RNASEL,RPL7,S100A9,SAMD9,SEC23A,SET,SH3KBP1,SLC16A3,SRI,STK4,SYTL1,TAGLN2,TBCB,VWF	65 (39)	39				AHR,ATM/ATR,BANP,DNAJB1,DNMT3A,DNMT3B,glutathione peroxidase,HSPA1A/HSPA1B,MAP2,MLH1,PTPN11,reactive oxygen species,RGL2,STXBP3,TFAM,TP53	ALOX5,ANPEP,APP,arginase,BIRC5,CCN2,CCNB1,cholesterol,Cop9 Signalosome,COPS5,CXCR4,Cyclin A,CYP1A2,D-glucose,EDN1,EGFR,EIF2A,ERN1,FYN,HIF1A,HSP90B1,IDH2,JUN,miR-199a-3p (and other miRNAs w/seed CAGUAGU),MPO,MTOR,NFAT (complex),NFKB1,NQO1,NT5E,PI3K (family),PPP1R3A,PRL,SP4,SREBF1,SREBF2,Top2,TXNRD1,Ubiquitin
HUWE1	transcription regulator	18.898	2			1.732	1.8e-10	0.0088	AR,EGFR,HUWE1,KRAS,MYC,PRKAR1A,TP53	ACTB,APOE,ATP1A1,ATP5F1C,ATP6AP1,B2M,CCT5,CDC42,CNN3,COX6B1,CYCS,DBI,FKBP4,FUBP1,GLRX5,GSK3A,HNRNPA2B1,HNRNPD,HNRNPH1,HSP90B1,HSPE1,ILK,ITGA2B,LASP1,LTB4R,MAPRE2,MIF,NAP1L4,NUDC,NUDT21,OLR1,P4HB,PABPC1,PDIA6,PPIA,PRKAR2B,PSMC6,PSMD2,RAB8A,RBM3,RELA,RPL7,SLC16A3,TES,UQCRC1,USO1,WIPF1,ZYX	48 (7)	6	CD28,CD3,HIF1A				CHEK1,EGFR,TP53
andrographolide	chemical drug		2			0.603	1.81e-10	0.0089	Akt,andrographolide,CASP8,ERK,JUN,P38 MAPK,REL,RELA,STAT3,TP53	AHCY,APOE,ATP1A1,ATP5F1C,CD55,CD9,CNN3,CYCS,DBI,FABP5,FCER1G,FKBP4,FUBP1,GSK3A,HNRNPA2B1,HSP90B1,HSPD1,ILK,ITGA2B,LASP1,LTB4R,MAPRE2,MIF,MINPP1,MPPE1,MT-CO2,NAP1L4,OLR1,P4HB,PDIA6,PSMD2,PXN,RAB8A,RBM3,RPL7,S100A9,SH3KBP1,STK4,SYTL1,TAGLN2,UQCRC1,USO1,WIPF1,ZYX	44 (10)	9				glutathione peroxidase,JUN,reactive oxygen species,TP53	BIRC5,FN1,MPO
NHLRC1	enzyme		3			1.364	1.82e-10	0.0332	26s Proteasome,Akt,BAX,beta-estradiol,E2F1,EGFR,EIF2AK3,ERN1,ESR1,fulvestrant,HIPK2,IREB2,MAPK1,NCOA1,NCOA2,NCOA3,NFkB (complex),NFKB1,NFKBIA,NHLRC1,NR3C1,Pka,PNPLA2,PRKAA2,PRKAG1,RELA,RPS6,SIRT1,tamoxifen,TP53,TSC2,YAP1	ACOT1,AHCY,ATP1A1,ATP5F1C,ATP6AP1,AVIL,CCT5,CDC42,CNN3,CTSZ,CYCS,DBI,DPP7,DSC1,EIF3I,ERP29,FABP3,FKBP4,GNB1,GSK3A,GSTO1,HNRNPA2B1,HNRNPD,HNRNPH1,HSPA5,KHSRP,LASP1,LTB4R,MAPRE2,MMP25,MMRN1,MPDU1,MPPE1,NAP1L4,NAPA,NT5DC2,P4HB,PABPC1,PDE4D,PDIA6,PGLS,PLIN3,PPIA,PPIB,PSMD2,PSMD6,RAB11FIP1,RAB5B,RAB8A,RBM3,RNASEL,RPL7,SAMD9,SET,SH3KBP1,SLC16A3,SLC44A2,SYTL1,TBCB,TMOD3,U2AF1/U2AF1L5,UBE2I,UQCRC1,VWF,ZYX	65 (32)	29
PRPF6	transcription regulator		3			-0.62	1.93e-10	0.0362	Akt,AKT1,AR,CCNE1,Creb,CREB1,EGFR,ERBB2,ESR1,FOS,GATA1,HIF1A,JUN,MAPK1,MAPK7,MED1,NCOA2,NR1H4,NR3C1,NR4A1,Pka,PRPF6,RELA,SREBF2,STUB1,TP53,TP73	ACOT1,ACTB,AHCY,ALDOC,ATP5F1C,ATP5PO,ATP6AP1,CCT3,CCT5,CD55,CD9,CNN3,COX6B1,CTSZ,CYCS,DNM3,DSC1,ERP29,FABP5,FCER1G,FUBP1,GNB1,GSK3A,GSTO1,HNRNPA2B1,HNRNPH1,HNRNPM,HSPA5,HSPE1,HUWE1,ILK,LTB4R,MAPRE2,MPPE1,MT-CO2,NAP1L4,NUCKS1,NUDC,P4HB,PABPC1,PCYT1A,PDE4D,PDIA6,PGLS,PLEK,PLIN3,PPIA,PSMA2,PSMD2,RAB5B,RAB8A,RBM3,RBMX,RPL7,S100A9,SAMD9,SLC44A2,SYNE2,SYTL1,THBS1,TMOD3,TUBB1,USO1,WDR72,WIPF1	65 (27)	26
1,2-dipalmitoyl-sn-glycero-3-phosphate	chemical - endogenous mammalian		3			-0.457	1.93e-10	0.0091	1,2-dipalmitoyl-sn-glycero-3-phosphate,Akt,AKT1,AKT3,CASP8,MTOR,MTORC2,P glycoprotein,Pkc(s),RICTOR,TP53	AHCY,APOE,ATP1A1,ATP5PO,ATP6AP1,AVIL,CD55,CNN3,COX6B1,CYCS,DBI,FKBP4,FUBP1,GSK3A,HNRNPM,HSP90B1,HSPA5,HSPE1,ILK,ITGA2B,LASP1,LTB4R,MAPRE2,MPPE1,NAP1L4,P4HB,PDIA6,PGP,PPIB,PRKAR2B,PSMA2,PSMC6,PSMD2,PSMD6,PXN,RAB8A,RBM3,S100A9,SLC16A3,TAGLN2,UQCRC1,USO1,ZYX	43 (11)	8					MTORC2
3-hydroxyanthranilic acid	chemical - endogenous mammalian		3			1.134	1.94e-10	0.0441	3-hydroxyanthranilic acid,AHR,Akt,AKT1,BAX,CCND1,CEBPA,CSF2,cytokine,EGFR,HIF1A,HNF4A,IKBKB,IL1B,IL6,IRF3,IRF4,JUN,MTOR,MYC,NFkB (complex),NFKB1,NOS2,PDPK1,Pka,Pkc(s),PPARG,PRKCA,PRKCE,REL,RELA,SP1,STAT1,TLR3,TP53	ACOT1,APOE,ATP5F1C,ATP5PO,AVIL,CCT3,CCT5,CD55,CNN3,COX6B1,CYCS,DNAJB1,FABP3,FABP5,FCER1G,FKBP4,FUBP1,GLRX,GLRX3,GLRX5,HINT1,HNRNPA2B1,HNRNPD,HNRNPH1,HNRNPM,HUWE1,ILK,KHSRP,MAPRE2,MINPP1,MMP25,MMRN1,MPPE1,NAP1L4,NUCKS1,NUDC,NUDT21,OLR1,PABPC1,PDE4D,PDIA6,PLEK,PLIN3,PPIA,PSMA2,PSMD2,PXN,RAB8A,RBM3,RELA,RPL7,S100A9,SF1,SH3KBP1,SLC16A3,STK4,SYTL1,TES,TUBB1,UBE2I,UQCRC1,USO1,VWF	63 (35)	33					D-glucose,RORC
PLK1	kinase		2			-0.651	1.95e-10	0.0326	26s Proteasome,Akt,BCL2L1,BIRC5,CTNNB1,ESR1,HSF1,IRF3,MYC,NFkB (complex),NFKBIA,PLK1,PTEN,SNCA,STAT3,TP53,TP63	ACTB,ATP1A1,ATP5F1C,ATP5PO,B2M,CCT5,CD9,CDC42,COX6B1,CTSZ,CYCS,DBI,DNAJB1,DSC1,FABP5,FCER1G,GLRX5,GNB1,GSK3A,HNRNPD,HNRNPH1,HSP90B1,HSPE1,ILK,ITGA2B,KHSRP,LASP1,LTB4R,MAPRE2,MIF,MPDU1,MPPE1,NAP1L4,NUDT21,OLR1,P4HB,PDIA6,PGLS,PLIN3,PPIA,PSMD2,PSMD6,RAB43,RAB5B,RAB8A,RBM3,RPL7,SAMD9,SEC23A,SLC44A2,SYNCRIP,TES,TMOD3,TUBB1,UQCRC1,USO1,VWF,WIPF1,ZYX	59 (17)	16	AHR,caffeine,E2F3,LATS2,MLXIPL,proTAME,RABL6	ATR,EGFR,geldanamycin,methoxyacetic acid,PRDX5,rigosertib		BIRC5,BUB1,BUB1B,CCNB1,CDC14A,ESR1,HSF1,HSPA1A/HSPA1B,MDC1,YY1	CDC20,FBXO5,GMNN
epicatechin gallate	chemical drug		2	Activated		2.412	1.96e-10	0.0117	ARG1,EGFR,epicatechin gallate,ERK,ERK1/2,IKBKG,NFkB (complex),NOS2,P38 MAPK,RELA,TP53	ACTB,AHCY,ATP1A1,ATP5F1C,B2M,CCT5,CD55,CNN3,CTSZ,CYCS,DBI,FABP5,FKBP4,FUBP1,GSK3A,HNRNPA2B1,HNRNPD,HNRNPH1,HSPD1,HSPE1,ILK,ITGA2B,LASP1,LTB4R,MAPRE2,NAP1L4,NUDC,P4HB,PABPC1,PDIA6,PPIA,PSMD2,PXN,RAB8A,RBM3,RPL7,SH3KBP1,SLC16A3,STK4,SYTL1,TAGLN2,UQCRC1,USO1,ZYX	44 (11)	10				glutathione peroxidase,MLH1	cholesterol,D-glucose,EGFR,TP53
PTPN4	phosphatase		3			-0.566	2.02e-10	0.0169	ATF2,CD247,DDIT3,EGFR,EIF4E,FOS,KAT5,MAPK1,MAPK12,MMP9,MYOD1,NFE2L2,PTPN4,SYK,TP53	ACTB,AHCY,APOE,ATP5F1C,AVIL,CCT3,CCT5,CNN3,CTSZ,CYCS,DBI,ERP29,FABP5,FCER1G,FKBP4,FUBP1,GSK3A,GSTO1,HNRNPA2B1,HNRNPD,HNRNPH1,HSPD1,HSPE1,ILK,LASP1,LTB4R,MAPRE2,NAP1L4,NUDC,P4HB,PABPC1,PPIA,PPIB,PRKAR2B,PSMA2,PSMD2,PSMD6,RAB8A,RBM3,RCSD1,RPL7,S100A9,SEC23A,TAGLN2,THBS1,UBE2I,UQCRC1,VPS4B,WIPF1,ZYX	50 (15)	13	ERG,ESR1				CD247,MAPK12
capsaicin	chemical drug		2	Inhibited		-3	2.04e-10	0.0193	Akt,Ap1,capsaicin,CIITA,EGFR,ERK1/2,HSF1,JUN,MAPK1,MAPK7,NFkB (complex),P38 MAPK,Pka,PPARG,RB1,STAT1,TP53	ACTB,AHCY,ALDOC,ATP1A1,ATP5F1C,ATP5PO,B2M,CCT3,CCT5,CD55,CNN3,COX6B1,CYCS,DBI,DNAJB1,ERP29,FABP3,FCER1G,FUBP1,GSK3A,HNRNPD,HNRNPH1,HSP90B1,HSPE1,ILK,LASP1,LTB4R,MAPRE2,MPPE1,NAP1L4,NUDC,OLR1,P4HB,PABPC1,PDE4D,PDIA6,PLIN3,PPIA,PSMD2,PXN,RAB8A,RBM3,RPL7,SLC16A3,TAGLN2,UBE2I,USO1,WIPF1,ZYX	49 (17)	16				GABA,HSF1,Insulin,reactive oxygen species,TP53	APP,CIITA,EGFR,glutathione peroxidase,JUN,MPO
apigenin	chemical - endogenous non-mammalian		2			0.662	2.05e-10	0.0427	Akt,apigenin,CDK2,CTNNB1,cytokine,EGFR,ERBB2,ERK1/2,ESR1,ESR2,HDAC3,IKBKE,IKBKG,JUN,NFkB (complex),RB1,RELA,SIX1,STAT5a/b,STAT6,TP53	AHCY,ALDOC,ATP5F1C,ATP5PO,B2M,CCT3,CCT5,CD55,CNN3,COX6B1,CTSZ,CYCS,DSC1,FABP3,FABP5,FCER1G,FUBP1,GNB1,GSK3A,HNRNPH1,HNRNPH3,HSPD1,HSPE1,ILK,LASP1,MAPRE2,MPPE1,MYL12A,NAP1L4,NUDC,P4HB,PCYT1A,PDIA6,PGLS,PLIN3,PPIA,PSMD2,PXN,RAB5B,RAB8A,RBM3,RELA,RPL7,SAMD9,SH3KBP1,SLC16A3,SLC44A2,SYNCRIP,SYTL1,TAGLN2,TES,TMOD3,TUBB1,UBE2I,UQCRC1,USO1,ZYX	57 (21)	21				ESR1,GPX4	AKR1C3,CSNK2A2,EGFR,HIF1A,JUN,KLK3,MUC5AC,reactive oxygen species,RPS6KB1,Top2,TP53
cyclosporin A	biologic drug		2			-0.962	2.07e-10	0.0286	Akt,CTNNB1,cyclosporin A,EGFR,EIF2AK3,HNF4A,IL17A,IL2,IRF3,ITK,MAPK1,MTOR,NFAT5,NFkB (complex),Nos,NR3C2,NR4A1,Pka,PKM,PLCG1,PPIA,REL,SRF	ACOT1,ACTB,ALDOC,APOE,ATP1A1,ATP5PO,AVIL,CCT5,CD55,CNN3,COX6B1,CTSZ,ERP29,FABP3,FABP5,FCER1G,FKBP4,HNRNPA2B1,HNRNPD,HNRNPH1,HSPA5,HSPD1,HSPE1,LTB4R,MIF,MINPP1,MMP25,MPPE1,NAPA,NUDC,OLR1,PABPC1,PDE4D,PGLS,PGP,PLIN3,PPIA,PRKAR2B,PXN,RBM3,RNASEL,S100A9,SLC16A3,STK4,TAGLN2,TMOD3,UBE2I,UQCRC1,USO1,VPS4B,VWF,WIPF1,ZYX	53 (23)	23				APOD,cholesterol,COL4A2,DNM1L,EGFR,EIF2AK3,FARP2,FN1,LCN2,MTOR,PLCG1,PRKACB,PRKCA,SREBF2,taurocholic acid,TMSB10/TMSB4X,TP53	Actin,aldosterone,APP,BATF,CCN2,CD8B,CXCR4,CYP2C9,DDIT4,EDN1,F5,FLT1,GZMA,GZMB,HIF1A,IL13,IL23,IL4,IL5,ITGAV,JUN,NFAT (complex),NFE2,NFKB1,PKM,reactive oxygen species,RORC,RPS6KB1,SDCBP,SREBF1,TNFSF10
taurolithocholate-3-sulfate	chemical - endogenous mammalian		3	Inhibited		-3.72	2.26e-10	0.0186	AGT,Akt,AKT1,APP,CCND1,Cdc42,CEBPB,Creb,CREB1,CSF1,CTNNB1,EGFR,ERBB2,ESR1,FAS,FOS,HIF1A,HSF1,JAK2,JUN,KAT5,KLF4,KRAS,LIPE,MAPK1,MAPK3,MAPK8,MED1,MYB,NCF1,NCOA1,NCOA3,NFE2L2,NFkB (complex),NFKBIA,NR4A1,P38 MAPK,PI3K (family),PKM,POU5F1,PPARG,RARA,RELA,SNAI1,SP1,SRC (family),SREBF1,SREBF2,STAT5a/b,STAT5B,STAT6,SYK,taurolithocholate-3-sulfate,TOB1,TP53,WBP2,XBP1,YES1	ACTB,AHCY,ATP1A1,ATP5F1C,ATP5PO,CCT5,CNN3,CORO1C,COX6B1,CTSZ,CYCS,DBI,DNAJB1,DPP7,DSC1,ERP29,ERP44,FKBP2,FUBP1,GSK3A,HINT1,HNRNPA2B1,HNRNPD,HNRNPH1,HNRNPH3,HNRNPM,HSP90B1,HSPA5,HSPE1,ILK,ITGA2B,MAPRE2,MIF,MMRN1,MPDU1,MPPE1,MT-CO2,NAP1L4,NUCKS1,NUDC,NUDT21,PABPC1,PDIA6,PEBP1,PGLS,PLIN3,PPIA,PPIB,PSMC6,PSMD2,PSMD6,PXN,RAB5B,RAB8A,RBM3,RBMX,RCSD1,RELA,RNASEL,RPL7,SAMD9,SEC23A,SEPTIN2,SET,SLC44A2,SYT…	74 (58)	54				EGFR
PRKACB	kinase		2	Inhibited		-3.042	2.35e-10	0.0034	ADRB2,Creb,CSK,FLNA,HSPA5,MYC,Pka,PRKACB,RARA,RELA,TP73	ACTB,AHCY,APOE,ATP1A1,B2M,CCT3,CD55,CNN3,COX6B1,CYCS,DBI,FABP5,FCER1G,GLRX5,HNRNPA2B1,HNRNPH1,HSPD1,HSPE1,MAPRE2,MIF,NUDT21,P4HB,PDE4D,PGLS,PLIN3,PPIA,PXN,RAB1B,RPL7,SAMD9,SH3KBP1,SLC16A3,STK4,SYNE2,SYTL1,TAGLN2,TES,THBS1,UBE2I	39 (11)	10	CSNK2A1,cyclosporin A,ESR1,metribolone	F2		PRL
warfarin	chemical drug		3			1.313	2.42e-10	0.0436	Akt,AKT1,Alp,AR,AXL,CEBPA,CHUK,CTNNB1,CYP2C8,EGFR,FOS,FOXO1,GAS6,ITGB3,JAK2,JUNB,MAPK1,MERTK,mir-21,MYC,NFkB (complex),NFKBIA,paclitaxel,PI3K (complex),PIK3R1,PKM,PRL,RHOA,SOD2,SRC (family),STAT3,STAT5a/b,TLR3,TP63,TP73,warfarin,YAP1	AHCY,ATP1A1,ATP5PO,ATP6AP1,CCT3,CCT5,CD9,CDC42,CTSZ,DBI,ERP29,FABP5,FCER1G,FKBP4,GLRX,GLRX3,GLRX5,HNRNPD,HNRNPH1,HNRNPM,HSPD1,HSPE1,ILK,KHSRP,LASP1,MAPRE2,MMP25,MMRN1,MPDU1,MPPE1,MT-CO2,MYL12A,NUCKS1,NUDC,NUDT21,OLR1,PABPC1,PGLS,PPIA,PRKAR2B,PSMA2,PXN,RBM3,RELA,RPL7,SAMD9,SEPTIN2,SET,SLC16A3,SYNE2,TAGLN2,TES,TUBB1,UBE2I,UQCRC1,VWF,WIPF1,ZYX	58 (37)	32	capecitabine	CYP2C9
dyphylline	chemical drug		3			0.98	2.47e-10	0.0132	ADORA1,ADORA2A,ADORA2B,ADORA3,ADRB2,Akt,Ca2+,CREB1,dyphylline,EGFR,MAPK1,NFkB (complex),NFKBIA,PDE3A,PDE4B,PDE4D,PDE5A,PDE8A,PRKAA1,PTEN,RHOA,SREBF2,TP53	ACTB,AHCY,ALDOC,ATP5F1C,ATP6AP1,CCT5,CD9,CTSZ,DBI,ERP29,FKBP4,FUBP1,GSK3A,HNRNPD,HNRNPH1,HSP90B1,HSPD1,HSPE1,ILK,LASP1,LTB4R,MAPRE2,MPDU1,MPPE1,MT-CO2,NAP1L4,NAPA,NUDC,OLR1,P4HB,PABPC1,PCYT1A,PDIA6,PEBP1,PPIA,PSMD2,RAB1B,RAB43,RAB8A,RBM3,RBMX,RPL7,S100A9,SEC23A,SH3KBP1,SLC16A3,SYNCRIP,UBE2I,UQCRC1,WIPF1,ZYX	51 (23)	15					ADORA1,ADORA2A,PDE3A
celecoxib	chemical drug		2			0.866	2.56e-10	0.0238	CA9,CDK2,celecoxib,CHUK,Creb,CTNNB1,E2F1,EGFR,EIF2AK3,EIF4EBP1,KIT,MAPK8,mir-29,MTOR,NFE2L2,NFkB (complex),NFKBIA,P38 MAPK,PI3K (complex),RB1,RELA,SP1,STAT3	ATP1A1,ATP5F1C,ATP5PO,AVIL,CCT3,CCT5,CD9,CDC42,COX6B1,CTSZ,CYCS,EIF3I,ERP29,FABP5,GSTO1,HINT1,HNRNPA2B1,HNRNPD,HNRNPH1,HSPA5,HSPD1,ILK,ITGA2B,LASP1,LTB4R,MIF,MPDU1,NAPA,PABPC1,PCYT1A,PDIA6,PGP,PLIN3,PPIA,PPIB,PRKAR2B,PSMD2,PXN,RELA,RNASEL,SEC23A,SH3KBP1,SLC16A3,STK4,SYTL1,UQCRC1,USO1,WIPF1	48 (23)	23				ALOX5,APP,EIF2AK3,ESR1,reactive oxygen species,TP53	3,4-dihydroxyphenylacetic acid,ATR,BIRC5,CA9,Cyclin A,Cyclin B,EGFR,HIF1A,MPO,MTOR,MUC5AC,SELP
Bcl10-Card11-Malt1	complex		3			-1.26	2.59e-10	0.0207	ATF1,BCL10,Bcl10-Card11-Malt1,CARD11,CASP8,Creb,FOS,FOXO3,GATA3,IKBKB,IKBKE,IKK (complex),Ikk (family),IRF3,JUN,MALT1,MAP3K7,Map3k7,MAP3K8,MAPK1,MAPK9,NFkB (complex),NFKB1,NFKB2,P38 MAPK,PI3K (complex),REL,RELA,STAT3,STAT5a/b,TP53	AHCY,ALDOC,APOE,ATP1A1,ATP5F1C,B2M,CD55,CD9,CNN3,CYCS,DBI,ERP29,FABP5,FKBP4,FUBP1,GSK3A,HNRNPA2B1,HSPD1,ILK,KHSRP,LASP1,LTB4R,MAPRE2,MIF,MINPP1,NAP1L4,P4HB,PDIA6,PLIN3,PRKAR2B,PSMA2,PSMD2,PXN,RAB8A,RBM3,RCSD1,RELA,RNASEL,RPL7,S100A9,SH3KBP1,SLC16A3,STK4,SYTL1,TAGLN2,TUBB1,UBE2I,UQCRC1,USO1,VWF,ZYX	51 (31)	26				NFKB1
7alpha-hydroxycholesterol	chemical - endogenous mammalian		3			-0.152	2.7e-10	0.0088	7alpha-hydroxycholesterol,CYP19A1,HIF1A,NFkB (complex),RELA,RORA,RORC,STAT5a/b,TP53	ACTB,AHCY,ALDOC,APOE,ATP1A1,ATP5F1C,ATP5PO,B2M,CNN3,DBI,FABP3,FKBP4,FUBP1,GSK3A,HSP90B1,HSPD1,HUWE1,ILK,LASP1,LTB4R,MAPRE2,MIF,MT-CO2,NAP1L4,NUCKS1,P4HB,PDIA6,PPIA,PRKAR2B,PSMD2,PXN,RAB8A,RBM3,RPL7,SH3KBP1,STK4,SYTL1,TAGLN2,TUBB1,UQCRC1,USO1,VWF,ZYX	43 (9)	7					D-glucose,RORC
TNFSF10	cytokine		2			-1.387	2.7e-10	0.0338	Akt,AKT1,BAK1,BAX,BCL2L1,CASP8,EIF4E,HSF1,JUN,MAP3K7,MAPK1,MAPK8,MTOR,NFkB (complex),NFKB1,P38 MAPK,PARP1,PI3K (complex),PLCG1,RELA,TNFSF10,TP53,TP73,ZAP70	AHCY,ALDOC,ATP1A1,ATP5F1C,AVIL,CCT3,CCT5,CTSZ,CYCS,DBI,DNAJB1,ERP29,FABP5,FKBP4,FUBP1,GSK3A,HNRNPM,HSPD1,ILK,KHSRP,LASP1,LTB4R,MAPRE2,MIF,MPPE1,NAP1L4,P4HB,PDIA6,PGP,PPIB,PRKAR2B,PSMD2,PXN,RAB8A,RBM3,RELA,RNASEL,RPL7,S100A9,SH3KBP1,SLC16A3,STK4,SYNE2,SYTL1,TAGLN2,TMOD3,UBE2I,UQCRC1,USO1,VPS4B,WIPF1,ZYX	52 (24)	24	APP,bortezomib,CD3,CXCR4,docetaxel,ESR1,F2,HIF1A,PI3K (family),PLX5622,STK11,thapsigargin,vorinostat	BCR-ABL1,cyclosporin A,Ubiquitin,V-PYRRO/NO		ABL1,death receptor,IFI16,JUN,MTOR,NFKB1	ANGPT2,BIRC5,CBL,DDIT4,EGFR,HSF1,IgG,IL13,IL5,Immunoglobulin,PLCG1,RORC
B56	group		3			0.295	2.84e-10	0.0078	AKT1,ATF1,AURKB,B56,BIRC5,CDKN1B,Creb,EIF4E,LIPE,MAPK1,MTOR,NFKBIA,PKM,PP1 protein complex group,PPP2R5A,PPP2R5C,RAF1,RASSF1,TAZ,TP53	ALDOC,ATP1A1,ATP5F1C,AVIL,B2M,CDC42,CNN3,CYCS,DBI,ERP29,FCER1G,FKBP4,FUBP1,GSK3A,HNRNPA2B1,HNRNPM,HSP90B1,HSPD1,ILK,LASP1,LTB4R,MAPRE2,MMP25,MPDU1,NAP1L4,P4HB,PDIA6,PGLS,PGP,PLIN3,PPIB,PRKAR2B,PSMD2,PSMD6,RAB8A,RBM3,RPL7,S100A9,TAGLN2,TUBB1,UBE2I,UQCRC1,USO1,VWF,WIPF1,ZYX	46 (20)	15
PROKR2	G-protein coupled receptor		3	Inhibited		-2.101	2.92e-10	0.0439	Akt,APP,ATF2,CCND1,CDKN1A,Creb,CSF1,FOS,G Protein I,GNG13,GNG7,HIF1A,HSF1,JUN,LIN28A,MAPK3,MED1,NFE2L2,NFkB (complex),NFKBIA,P38 MAPK,PARP1,PKM,PROKR2,SNAI2,SREBF1,SREBF2,STAT3,TP53,TWIST1,XBP1	ACTB,AHCY,ALDOC,ATP1A1,ATP5F1C,ATP5PO,CCT5,CD55,CD9,CDC42,CNN3,CTSZ,CYCS,DBI,DNAJB1,ERP44,FABP3,FABP5,FKBP2,FUBP1,GNB1,GSK3A,GSTO1,HNRNPA2B1,HUWE1,ILK,LTB4R,MAPRE2,MIF,MPDU1,MPPE1,NAP1L4,NUCKS1,P4HB,PDIA6,PGLS,PLIN3,PPIA,PPIB,PRKAR2B,PSMA2,PSMD2,PXN,RAB5B,RAB8A,RBM3,RNASEL,RPL7,SEC23A,SLC16A3,STK4,TAGLN2,THBS1,TMOD3,TUBB1,UQCRC1,WDR72,ZYX	58 (31)	29				FSH
ZEB1	transcription regulator		2			-1.64	2.97e-10	0.0111	BAX,CCND1,MYC,TP53,ZEB1	ACTB,AHCY,APOE,ATP1A1,ATP5F1C,CCT3,CNN3,COX6B1,CYCS,FKBP4,FUBP1,GLRX5,GSK3A,HNRNPA2B1,HNRNPD,HNRNPH1,HSPA5,HSPD1,HSPE1,ILK,ITGA2B,LASP1,MAPRE2,MIF,MT-CO2,NAP1L4,NUDT21,OLR1,P4HB,PCYT1A,PDIA6,PPIA,PSMD2,RAB8A,RBM3,RELA,SLC16A3,TAGLN2,TES,THBS1,TUBB1,UBE2I,UQCRC1,USO1,ZYX	45 (5)	5	CUL7,ECM1,EGFR,ERG,levodopa,LGR4,NRF1,SKP2,SUMO-Ubc9 E2,TGM2,TRIM29	3,3'-diindolylmethane,FAT1,mir-515,NDRG1,silibinin,SRI		CCN2,CHEK1,EDN1,FN1,HK2,miR-199a-3p (and other miRNAs w/seed CAGUAGU),PKM,TF	CGA,KRT19,LPCAT1
actinomycin D	biologic drug		2			-1	3.18e-10	0.0258	actinomycin D,AKT1,BAX,CASP8,GCK,HIF1A,JAK2,MAPK1,NFkB (complex),NFKBIA,PPARG,STAT6,TP53	ACTB,AHCY,ALDOC,ATP1A1,ATP5F1C,CD55,CNN3,CTSZ,DBI,ERP29,FABP3,FCER1G,FKBP4,FUBP1,GSK3A,HNRNPH3,HNRNPM,HSPD1,HUWE1,ILK,LASP1,LTB4R,MAPRE2,MIF,MPDU1,MT-CO2,NAP1L4,NUCKS1,OLR1,P4HB,PDIA6,PLIN3,PPIA,PRKAR2B,PSMD2,PXN,RAB8A,RBM3,RELA,RPL7,S100A9,SET,SLC16A3,TAGLN2,TES,UBE2I,USO1,WIPF1,ZYX	49 (13)	13				BIRC5,DDIT4,RPS6KB1,TP53	APOA1,APP,CCN2,CD28,CGA,FN1,HIF1A,Insulin,JUN,PDE3A,PRL,RGS2,SCNN1B,SMAD7,TBC1D10A,TF,UBE2D1,VIP
PRKN	enzyme		2			1	3.22e-10	0.0274	26s Proteasome,Akt,AKT1,BAK1,BAX,CASP8,CCNE1,CTNNB1,EGFR,ERK1/2,IKBKG,MAPK8,NFkB (complex),PRKN,RELA,SEPTIN5,TFEB,TP53	ACTB,AHCY,ATP1A1,ATP5PO,B2M,CCT5,CNN3,CTSZ,DBI,FKBP4,FUBP1,GSK3A,HNRNPA2B1,HNRNPD,HNRNPM,HSPD1,HSPE1,ILK,ITGA2B,LASP1,LTB4R,MAPRE2,MIF,MPPE1,NAP1L4,NUDC,P4HB,PABPC1,PCYT1A,PDIA6,PLIN3,PPIA,PSMD6,PXN,RAB8A,RBM3,RPL7,S100A9,SEPTIN2,SEPTIN7,SH3KBP1,SLC16A3,STK4,SYTL1,TAGLN2,UBE2I,UQCRC1,USO1,ZYX	49 (18)	18	CSNK2A1,EIF2AK3,PINK1,Ubiquitin	ABL1,CSNK1D,DDIT4,Fus,GABA,PICK1,Z-LLL-CHO			5-hydroxytryptamine,CCNE1,EGFR,NQO1,reactive oxygen species,SEPTIN5,SNCAIP
RHOA	enzyme		2			-0.7	3.24e-10	0.0345	Akt,Cdc42,CHUK,ECT2,HRAS,MAPK1,MAPK8,MRTFA,NFATC1,NFkB (complex),NFKB1,PI3K (complex),PLD2,PPARG,PRKCA,PRKCB,RELA,RHOA,ROCK2,SRF,STAT3,STAT5a/b,Tgf beta,TP53	ACTB,AHCY,ATP1A1,ATP5F1C,ATP5PO,CD55,CD9,CDC42,CNN3,CTSZ,CYCS,DBI,DSC1,ERP29,FABP3,FCER1G,FKBP4,FUBP1,GNB1,GSK3A,HSP90B1,HSPD1,ILK,KHSRP,LASP1,LTB4R,MAPRE2,MIF,MPPE1,NAP1L4,P4HB,PCYT1A,PDIA6,PLIN3,PRKAR2B,PSMD2,PXN,RAB8A,RBM3,RPL7,SH3KBP1,SLC16A3,STK4,SYTL1,TAGLN2,TMOD3,TUBB1,UBE2I,UQCRC1,USO1,VWF	51 (24)	24	5-hydroxytryptamine,7-ketocholesterol,ADGRG3,aldosterone,APP,ARAP3,ARHGEF1/12,ARHGEF18,ARHGEF25,ARRB2,arsenic trioxide,BCR-ABL1,CD28,CXCR4,D-glucose,EDN1,EGFR,EPHA3,F2,F2R,FYN,GCSAM,IL13,IL4,Insulin,KISS1R,MTORC1,MTORC2,PDZGEF,PI3K (family),reactive oxygen species,RICTOR,SDCBP,SKP2,STK11,tetraethylammonium,UDP-D-glucose,UTS2	ammonium,bisindolylmaleimide iv,ERG,IPMK,LCAT,mitoxantrone,MTOR,N-acetyl-L-cysteine,NEUROG1,puromycin aminonucleoside,RGS2,SFLLRN (PAR1-activator),simvastatin,SMAD7,TNS3,tyrphostin 47,Y 27632,Z-LLL-CHO		CCN2,CCNB1,CCNE1,JUN,MAPK12,Nedd4,NFKB1,NFKBIB,SCNN1B	ESR1,IBSP,MEFV
NQO1	enzyme		2			0.302	3.25e-10	0.0149	Akt,aristolochic acid I,CHUK,ERK1/2,NFkB (complex),NFKBIA,NFKBIZ,NQO1,P38 MAPK,PARP1,PDK1,Pkc(s),tanespimycin,TP53	AHCY,ATP1A1,ATP5F1C,B2M,CD55,CNN3,CTSZ,CYCS,DBI,DNAJB1,FKBP4,FUBP1,GSK3A,HNRNPA2B1,HNRNPC,HNRNPM,HSP90B1,HSPD1,ILK,ITGA2B,LASP1,LTB4R,MAPRE2,MPDU1,MPPE1,MT-CO2,NAP1L4,OLR1,P4HB,PDIA6,PSMD2,PXN,RAB8A,RBM3,RBMX,RPL7,S100A9,SLC16A3,SLC44A2,TAGLN2,TMOD3,UQCRC1,USO1,ZYX	44 (14)	13	1,2-dithiol-3-thione,3,3'-diindolylmethane,6-methylsulfinylhexyl isothiocyanate,ADCYAP1,AHR,arsenic,arsenic trioxide,arsenite,CRTC1,ethoxyquin,HIPK1,NRF1,PI3K (family),S-equol,salvianolic acid B,Z-LLL-CHO	BACH1,cibacron blue F 3GA,curcumin,CYP1A2,DNMT3A,ESR1,mitoxantrone,N-acetyl-L-cysteine,PRKN,TXNRD1		BIRC5,HK2,PKM,tanespimycin,TP53	C5AR1,CXCR4,reactive oxygen species
ERBB4	kinase		2			1.857	3.3e-10	0.022	AKT1,EGFR,ERBB2,ERBB4,ERK1/2,MAPK1,NFkB (complex),PI3K (complex),PSEN1,STAT5a/b,STAT5B,TP53	ACOT1,AHCY,ALDOC,ATP1A1,ATP5F1C,B2M,CCT5,CDC42,CNN3,CTSZ,DBI,DHRS7,ERP29,FKBP4,FUBP1,GNB1,GSK3A,HNRNPA2B1,HNRNPD,HNRNPH1,HNRNPM,HSP90B1,HSPD1,HSPE1,ILK,LTB4R,MAPRE2,MMRN1,MPPE1,NAP1L4,NUDC,OLR1,PABPC1,PDIA6,PPIA,PRKAR2B,PSMD2,RAB8A,RBM3,RPL7,SLC16A3,TAGLN2,THBS1,TUBB1,UBE2I,UQCRC1,USO1,WIPF1,ZYX	49 (12)	12	DCN,growth factor,IL13,PRL,Tardbp	cholesterol,EDN1,ESR1		JUN	HBA1/HBA2,SERPINE2,TP53
Tween 20	chemical toxicant		3			-1.477	3.34e-10	0.0342	AGT,Akt,AKT1,Cdc42,CREB1,EGFR,ERBB2,FAS,FOS,HIF1A,HRAS,JAK2,KLF11,KRAS,MAPK1,MAPK8,MTOR,NFKBIA,P38 MAPK,PARP1,PPARG,PTEN,PTGS2,RHOA,SP1,STAT3,STAT5a/b,STAT5B,STAT6,STK11,TP53,Tween 20,WBP2,YAP1	ACOT1,ACTB,ATP5F1C,AVIL,CCT5,CD9,CNN3,CORO1C,COX6B1,CTSZ,ERP29,FABP3,FKBP4,FUBP1,GNB1,GSK3A,HINT1,HNRNPA2B1,HNRNPD,HNRNPH1,HNRNPH3,HNRNPM,HSP90B1,HSPA5,HSPD1,HSPE1,HUWE1,ILK,LTB4R,MAPRE2,MIF,MMP25,MMRN1,MPDU1,MPPE1,MT-CO2,NAP1L4,NUCKS1,NUDC,P4HB,PABPC1,PCYT1A,PDIA6,PGP,PPIA,PPIB,PSMA2,PSMC6,PSMD2,RAB43,RAB8A,RBM3,RBMX,RELA,RPL7,SEC23A,SEPTIN2,SET,SH3KBP1,SYNCRIP,TES,THBS1,TMOD3,TUBB1,USO1,ZYX	66 (34)	32				EGFR
ascorbic acid	chemical - endogenous mammalian		2	Activated		2.48	3.41e-10	0.0171	Akt,ascorbic acid,CASP8,ERK1/2,ERN1,Hif1,JUN,MAPK1,MAPK8,NFkB (complex),NFKBIA,Pka,TP53,XBP1	AHCY,ATP5F1C,B2M,CNN3,CTSZ,CYCS,DBI,ERP29,ERP44,FABP5,FKBP2,FKBP4,FUBP1,GSK3A,HNRNPA2B1,HSP90B1,HSPA5,HSPD1,ILK,LASP1,LTB4R,MAPRE2,MIF,MPDU1,MPPE1,MT-CO2,NAP1L4,OLR1,P4HB,PCYT1A,PDE4D,PDIA6,PPIB,PSMD2,PXN,RAB8A,RBM3,RPL7,S100A9,SEC23A,SLC16A3,TAGLN2,TBCB,UBE2I,UQCRC1,WIPF1,ZYX	47 (14)	14	cadmium	Co2+		D-glucose,ITGAV,SREBF2	APOA1,cholesterol,Cyclin A,ERN1,F2,HIF1A,JUN,NDRG1,reactive oxygen species,TP53,XBP1
capecitabine	chemical drug		3			-1.131	3.47e-10	0.0308	Akt,AKT1,capecitabine,CDK2,CDKN1B,CHUK,Creb,CYP2C9,diclofenac,EGFR,EIF4E,EIF4EBP1,ERBB2,IKBKB,JUN,LIN28A,losartan potassium,MAP2K1,MAPK1,MAPK7,MYOD1,NFE2L2,NFkB (complex),NFKB1,NFKBIB,P38 MAPK,PI3K (complex),SP1,STAT3,STK11,warfarin	ACTB,AHCY,ALDOC,ATP1A1,ATP5F1C,AVIL,CCT3,CCT5,CD55,CD9,COX6B1,CTSZ,CYCS,DNAJB1,FABP5,FCER1G,GSTO1,HINT1,HNRNPA2B1,HNRNPD,HNRNPH1,HNRNPM,HSPA5,HSPD1,HSPE1,ITGA2B,KHSRP,LASP1,LTB4R,MPPE1,NUDC,OLR1,PABPC1,PCYT1A,PDIA6,PLIN3,PPIA,PPIB,PRKAR2B,PXN,S100A9,SEC23A,SLC16A3,STK4,SYTL1,THBS1,UBE2I,UQCRC1,USO1,WIPF1	50 (31)	28				mir-10,warfarin	CYP2C9
NU6102	chemical drug		3			1.305	3.49e-10	0.0243	Akt,AKT1,APP,AR,BCL2L1,BIRC5,CDK1,CDK2,Creb,CREB1,CTNNB1,E2F1,EGFR,ERBB2,ESR1,FOS,HIF1A,HMGA1,IREB2,JUN,JUNB,KAT5,MAPK1,MAPK7,MASTL,MDM4,MYC,NCOA1,NCOA2,NFkB (complex),NU6102,PARP1,Pka,RB1,RELA,SOX2,SP1,SREBF2,STUB1,TP53,TP73,TSC1,WT1,YAP1	ACOT1,ALDOC,APRT,ATP5F1C,ATP5PO,ATP6AP1,CCT3,CCT5,CD55,CNN3,COX6B1,CYCS,DBI,DNM3,DSC1,EIF3I,ERP29,FABP5,FKBP4,FUBP1,GLRX,GLRX5,GNB1,HINT1,HNRNPH1,HNRNPM,HSPA5,HSPE1,HUWE1,ILK,LASP1,MMP25,MPPE1,MT-CO2,MYL12A,NAP1L4,NUDC,P4HB,PABPC1,PCYT1A,PDE4D,PDIA6,PGLS,PLIN3,PPIA,PPIB,PSMA2,PSMD2,PSMD6,PXN,RAB11FIP1,RAB5B,RBM3,RBMX,RNASEL,RPL7,SAMD9,SEPTIN2,SLC16A3,SLC44A2,SYNE2,SYTL1,TES,THBS1,TMOD3,TUBB1,U2AF…	71 (44)	42
mibolerone	chemical drug		3			-1.838	3.56e-10	0.0494	Akt,AKT1,AR,CCNE1,Creb,CREB1,CREBBP,EGFR,EP300,ERBB2,ESR1,HIF1A,MAPK7,mibolerone,NCOA2,NFkB (complex),NR4A1,Pka,RELA,SMAD3,SRC (family),SREBF2,STUB1	ACOT1,ACTB,ALDOC,ATP1A1,ATP5PO,ATP6AP1,B2M,CCT3,CCT5,CD9,CNN3,COX6B1,DBI,DNM3,DSC1,ERP29,FABP5,FKBP4,GNB1,GSK3A,GSTO1,HNRNPA2B1,HNRNPH1,HNRNPM,HSP90B1,HSPA5,HSPD1,HSPE1,HUWE1,LTB4R,MIF,MPPE1,MT-CO2,NUCKS1,NUDC,P4HB,PABPC1,PCYT1A,PDE4D,PGLS,PLIN3,PPIA,PPIB,PRKAR2B,PXN,RAB5B,RBMX,RELA,SAMD9,SLC16A3,SLC44A2,SYTL1,THBS1,TMOD3,UQCRC1,USO1,WIPF1,ZYX	58 (23)	23				AMD1,FKBP1A,GMNN,HSP90B1,INCENP,KLK3,Manf,SEC23B	AHR,DNAJA4,FHL1,TF
MTORC2	complex		2			0.309	3.59e-10	0.0109	Akt,AKT1,AKT3,MTOR,MTORC2,Pkc(s),RICTOR,TP53	AHCY,APOE,ATP1A1,ATP5PO,ATP6AP1,AVIL,CD55,CNN3,COX6B1,CYCS,DBI,FKBP4,FUBP1,GSK3A,HNRNPM,HSP90B1,HSPA5,HSPE1,ILK,ITGA2B,LASP1,LTB4R,MAPRE2,MPPE1,NAP1L4,P4HB,PDIA6,PGP,PPIB,PRKAR2B,PSMA2,PSMC6,PSMD2,PSMD6,PXN,RAB8A,RBM3,SLC16A3,TAGLN2,UQCRC1,USO1,ZYX	42 (8)	7	CD28,Insulin,NSC 126405,RICTOR,TCR	1,2-dipalmitoyl-sn-glycero-3-phosphate,ABTL0812,BI 860585,D-glucose,DGKQ,DS-3078a,Immunoglobulin,LXI-15029,MTORC1,OSI-027,sapanisertib,SMAD7		AKT3,IL4,OXSR1,RHOA,SREBF1,TP53
CASP8AP2	transcription regulator		3			0.397	3.65e-10	0.0232	AHR,Akt,ATF2,CASP3,CASP8,CASP8AP2,CCND1,CEBPA,CSF2,cytokine,DICER1,HIF1A,HNF4A,IKBKB,IL18,IL6,IRF3,IRF4,JUN,NFkB (complex),NFKBIA,NOS2,PARP1,PPARG,PRKN,PTEN,REL,RELA,SP1,STAT4,TP53	ACOT1,ACTB,APOE,ATP5F1C,ATP5PO,CYCS,DNAJB1,FABP3,FABP5,FKBP4,FUBP1,GLRX,GSK3A,HINT1,HNRNPA2B1,HNRNPH1,HSPD1,HUWE1,ILK,MAPRE2,MINPP1,MMP25,MMRN1,MPDU1,MPPE1,NAP1L4,NUCKS1,OLR1,PGP,PLEK,PLIN3,PPIA,PPIB,PRKAR2B,PSMA2,PSMD2,PXN,RAB43,RAB8A,RBM3,RELA,RPL7,S100A9,SEC23A,SET,SF1,SH3KBP1,SLC16A3,STK4,SYNCRIP,TAGLN2,TMOD3,TUBB1,UBE2I,UQCRC1,USO1,VWF	57 (31)	29		ESR1
APBB1IP	other	-1.366	3	Inhibited		-2.885	3.7e-10	0.0233	AHR,Akt,APBB1IP,CASP8,Cdc42,CHUK,EGFR,F10,IGF1R,IRF3,ITGA2B,ITGA5,ITGAM,ITGB2,ITGB3,JAK2,MAPK1,MAPK8,MAPK9,MTOR,NFkB (complex),NFKBIA,P38 MAPK,PI3K (complex),PLG,REL,RELA,SRC (family),STAT3,STAT6,SYK,Talin,Tgf beta,TP53	AHCY,APOE,ATP1A1,ATP5F1C,ATP5PO,AVIL,CCT5,CDC42,CNN3,CTSZ,DBI,DNAJB1,ERP29,FKBP4,FUBP1,GSK3A,HNRNPA2B1,HNRNPD,HNRNPH1,HNRNPH3,HSPE1,ILK,LASP1,MAPRE2,MIF,MINPP1,MMP25,MPDU1,MPPE1,NAP1L4,NUDC,P4HB,PABPC1,PGP,PPIA,PPIB,PSMD2,PXN,RAB8A,RBM3,RCSD1,RPL7,S100A9,SET,SH3KBP1,STK4,SYTL1,TAGLN2,TES,UBE2I,USO1,WIPF1,ZYX	53 (34)	30				ITGA2B
SGPL1	enzyme		3	Inhibited		-2.018	3.71e-10	0.0221	Akt,BAD,CASP3,CASP7,CEBPB,Creb,CREB1,CSF1,CSF2,EGFR,ESR1,HIF1A,HSF1,IKBKB,IKBKE,IL18,IRF3,KAT5,KLF4,LIPE,MAPK1,MAPK3,MAPK8,MED1,MTOR,NCOA1,NCOA2,NCOA3,NFE2L2,NFKB1,NFKBIA,NR4A1,P38 MAPK,PKM,POU5F1,PPARG,PRKN,PSEN1,PSEN2,PTEN,RARA,REL,RELA,Secretase gamma,SGPL1,SNAI1,SP1,SREBF1,SREBF2,STAT1,STAT5a/b,SYK,TOB1,TP53,XBP1,YAP1	ACOT1,AHCY,ALDOC,ATP1A1,ATP5F1C,ATP5PO,AVIL,B2M,CCT5,COX6B1,DBI,DHRS7,DNAJB1,DPP7,DSC1,ERP29,ERP44,FCER1G,FKBP2,FUBP1,GSK3A,HINT1,HNRNPD,HSPA5,HSPE1,ILK,ITGA2B,KHSRP,MAPRE2,MIF,MINPP1,MMP25,MPDU1,MPPE1,NAP1L4,NUCKS1,NUDC,NUDT21,P4HB,PABPC1,PEBP1,PGLS,PGP,PLIN3,PPIA,PPIB,PSMD2,PSMD6,RAB43,RAB5B,RAB8A,RBM3,RBMX,RCSD1,RPL7,SEC23A,SET,SF1,SLC16A3,SLC44A2,STK4,SYNCRIP,SYTL1,TAGLN2,THBS1,U2AF1/U2AF1L5,…	71 (56)	52	elaidic acid,TP53	mir-10		mir-1	APP,cholesterol
L-asparagine	chemical - endogenous mammalian		3	Inhibited		-2.138	3.74e-10	0.0281	AKT1,CASP8,CD247,CD28,CD3,CREB1,CXCL12,EGFR,EIF4E,EIF4EBP1,ERK1/2,ESR1,HMGA1,HRAS,L-asparagine,LCK,MYC,NFkB (complex),NFKBIA,NRAS,P38 MAPK,p70 S6k,PAK2,PDX1,PI3K (complex),PIK3R1,PLCG1,TCR,ZAP70	AHCY,ALDOC,ATP1A1,ATP5F1C,B2M,CCT3,CCT5,CD55,CDC42,COX6B1,CYCS,DBI,DSC1,FABP5,FKBP2,GLRX5,HINT1,HNRNPH1,HNRNPM,HSPD1,HSPE1,HUWE1,ILK,LASP1,LTB4R,MMRN1,MPDU1,NUDC,NUDT21,OLR1,PABPC1,PCYT1A,PDE4D,PDIA6,PGLS,PPIA,PRKAR2B,PXN,RAB5B,RBM3,RBMX,RPL7,S100A9,SAMD9,SEPTIN2,SEPTIN7,SH3KBP1,SLC44A2,STK4,SYNCRIP,TES,TMOD3,TUBB1,UQCRC1,VPS4B,ZYX	56 (29)	26	CA9			CCNE1
thiol	chemical - endogenous mammalian		3	Inhibited		-2.94	3.74e-10	0.0366	Akt,AKT1,APP,Creb,CXCL12,cytokine,EIF4E,F10,F2,F2R,F3,IGF1R,MMP3,MMP7,MMP9,MTOR,NFkB (complex),P38 MAPK,PDK,PDK1,PLAU,PLG,RELA,SP1,Tgf beta,TGFB1,thiol,TNF,VEGFA	ACTB,ATP1A1,ATP5PO,AVIL,CBFB,CCT5,CD9,CDC42,CNN3,CORO1C,COX6B1,CTSZ,CYCS,DBI,EIF4H,ERP29,FKBP2,FUBP1,HINT1,HNRNPC,HNRNPD,HNRNPH1,HNRNPM,LASP1,MIF,MPPE1,MYL12A,NUDT21,P4HB,PCYT1A,PDE4D,PGP,PLIN3,PPIB,PRKAR2B,PSMA2,PXN,RBM3,RNASEL,S100A9,SAMD9,SEPTIN7,SET,SH3KBP1,SLC16A3,SLC44A2,SRI,STK4,SYNCRIP,SYTL1,TAGLN2,THBS1,TMOD3,UQCRC1,USO1,VWF	56 (29)	25	N-acetyl-L-cysteine	4-hydroxynonenal,TXN
RB1CC1	other		2			1.151	3.78e-10	0.003	RB1CC1,RELA,TP53	AHCY,APOE,ATP1A1,ATP5F1C,B2M,CNN3,DBI,FABP5,FKBP4,FUBP1,GSK3A,HSP90B1,HSPA5,HSPD1,ILK,ITGA2B,LASP1,LTB4R,MAPRE2,MT-CO2,NAP1L4,OLR1,P4HB,PDIA6,PSMD2,PXN,RAB8A,RBM3,RELA,RPL7,SH3KBP1,STK4,SYTL1,TAGLN2,UQCRC1,USO1,ZYX	37 (3)	2		MTOR		SMAD7	SKI
PTPN11	phosphatase	-1.38	2			1.697	3.81e-10	0.0271	AKT1,CD247,CD28,EGFR,ERBB2,ERK1/2,HRAS,IGF1R,IRF1,IRF3,JAK2,MAPK1,MAPK7,MTOR,NFkB (complex),NFKBIA,NRAS,PI3K (complex),PLCG1,PLCG2,PRKAA2,PTPN11,SRC (family),STAT1,STAT3,STAT5B,SYK,TCR,TSC2,ZAP70	ACOT1,ACTB,ALDOC,APOE,ATP1A1,ATP5F1C,ATP5PO,AVIL,B2M,CCT5,CD9,CDC42,CTSZ,DPP7,ERP29,FKBP2,GNB1,HINT1,HNRNPA2B1,HNRNPD,HNRNPH1,HNRNPM,HSPD1,HSPE1,HUWE1,LASP1,MMRN1,MPDU1,MPPE1,NUDC,P4HB,PABPC1,PCYT1A,PDE4D,PGP,PPIA,PPIB,RBM3,RCSD1,RPL7,SET,STK4,SYNCRIP,TUBB1,UBE2I,UQCRC1,VPS4B,VWF,WIPF1,ZYX	50 (30)	29	CBL,CCN2,curcumin,F2,FN1,growth factor,PRKCA,PRL,STK11	arsenic trioxide,bisindolylmaleimide iv,BTK,Immunoglobulin,N-acetyl-L-cysteine		ABL1,CHEK1,DNM2,MPO,PLCG1	CD247,CD28,CYBB,D-glucose,FYN,MTOR,RPS6KB1,TBK1,VIP
NR2F2	ligand-dependent nuclear receptor		2			-0.16	3.89e-10	0.0053	CEBPA,NR2F2,POU5F1,TP53	AHCY,ALDOC,APOE,ATP1A1,ATP5F1C,CNN3,CYCS,DBI,FABP5,FKBP4,FUBP1,GLRX,GSK3A,HSPA5,HSPD1,ILK,ITGA2B,LASP1,LTB4R,MAPRE2,MMRN1,MT-CO2,NAP1L4,NUDT21,OLR1,P4HB,PDIA6,PSMD2,RAB8A,RBM3,RELA,RPL7,S100A9,TAGLN2,THBS1,UBE2I,UQCRC1,USO1,ZYX	39 (4)	3	dimethyl sulfoxide	HEY1		TP53	aldosterone
Itgal-Itgb2	complex		3			-1.54	4.04e-10	0.0145	Akt,AKT1,AR,Cdc42,CHUK,CTNNB1,EGFR,Itgal-Itgb2,ITGB2,MAPK1,MAPK8,MAPK9,NFkB (complex),Nos,P38 MAPK,PI3K (complex),PLCG1,PTK2B,RHOA,SNCA,STAT5B,STAT6,SYK,TP53	ACOT1,AHCY,ALDOC,ATP1A1,ATP5F1C,ATP5PO,ATP6AP1,CCT3,CCT5,CD55,COX6B1,CTSZ,DBI,ERP29,FUBP1,GSK3A,HNRNPA2B1,HNRNPD,HNRNPH1,HNRNPH3,HNRNPM,HSP90B1,HSPD1,HSPE1,ILK,MAPRE2,MIF,MMRN1,MPPE1,NAP1L4,NUDC,OLR1,P4HB,PABPC1,PDIA6,PLIN3,PPIA,PRKAR2B,PSMD2,PXN,RAB8A,RBM3,RCSD1,RPL7,SLC16A3,TAGLN2,TES,UBE2I,USO1,VWF,ZYX	51 (24)	21
Intersectin	group		3			1	4.05e-10	0.0357	Akt,Ap1,BAK1,BAX,CDC42,Cdc42,EGFR,ERK,ERK1/2,Intersectin,ITSN1,JUN,MAP2K3,MAPK1,MAPK8,NFkB (complex),P38 MAPK,PAK2,PI3K (complex),PPARG,PRKCA,RB1,RHOA,SRF,TP53	AHCY,ATP1A1,ATP5F1C,ATP5PO,B2M,CCT5,CNN3,COX6B1,CTSZ,CYCS,DBI,ERP29,FABP3,FKBP4,FUBP1,GSK3A,HNRNPD,HNRNPH1,HSP90B1,HSPD1,HSPE1,ILK,ITGA2B,LTB4R,MAPRE2,MIF,MPPE1,NAP1L4,NUDC,OLR1,P4HB,PABPC1,PDIA6,PLIN3,PPIA,PRKAR2B,PSMD2,PXN,RAB8A,RBM3,RPL7,SLC16A3,STK4,TAGLN2,TMOD3,TUBB1,UBE2I,USO1,WIPF1	49 (25)	22
miR-30c-5p (and other miRNAs w/seed GUAAACA)	mature microRNA		2			0.667	4.15e-10	0.0021	miR-30c-5p (and other miRNAs w/seed GUAAACA),TP53	AHCY,APOE,ATP1A1,ATP5F1C,CBFB,CNN3,DBI,FABP5,FKBP4,FUBP1,GSK3A,HNRNPM,HSPA5,HSPD1,ILK,ITGA2B,LASP1,LTB4R,MAPRE2,MPDU1,MT-CO2,NAP1L4,P4HB,PDIA6,PSMD2,RAB8A,RBM3,RELA,RPL7,SEC23A,TAGLN2,THBS1,UBE2I,UQCRC1,USO1,ZYX	36 (2)	2	5-fluorouracil,D-glucose,docetaxel	ALOX5,FSH,Insulin,PAX3-FOXO1			ANPEP,BCL6,CCN2,cholesterol,COL4A2,F2,HEY1,JUN,NCEH1,NT5E,PSEN1,STX1A,TP53
CYC 116	chemical drug		3			0.272	4.19e-10	0.0486	Akt,AKT1,AURKA,AURKB,BIRC5,BRCA1,CREB1,CYC 116,ERK1/2,KDR,MYC,NFKBIA,P38 MAPK,PI3K (complex),PKM,PLCG1,RASSF1,SDCBP,SRC (family),STAT3,STAT5A,TP53	ACTB,ALDOC,APOE,ATP1A1,ATP5F1C,B2M,CCT3,CD55,CD9,CDC42,CNN3,COX6B1,CTSZ,CYCS,DBI,FABP5,FCER1G,FKBP4,FUBP1,GLRX5,GSK3A,HNRNPA2B1,HNRNPD,HNRNPH1,HNRNPM,HSPE1,LASP1,LTB4R,MAPRE2,MPDU1,MPPE1,NAP1L4,OLR1,P4HB,PDIA6,PEBP1,PGLS,PPIA,PRKAR2B,PSMD2,RAB8A,RBM3,RBMX,RPL7,SH3KBP1,SLC16A3,TES,TUBB1,UBE2I,UQCRC1,USO1,VWF,WIPF1,ZYX	54 (22)	18					AURKA
pentamidine	chemical drug		3			0	4.22e-10	0.0174	26s Proteasome,AGER,Akt,Creb,ERK1/2,HIF1A,MAPK1,mitomycin C,NFATC1,NFkB (complex),Nos,NOS2,P38 MAPK,pentamidine,RHOA,S100B,TLR2,TP53	AHCY,ALDOC,ATP1A1,ATP5F1C,ATP5PO,B2M,CD55,CDC42,CNN3,CYCS,DBI,ERP29,FCER1G,FKBP4,FUBP1,GSK3A,HSP90B1,HSPD1,HUWE1,ILK,LASP1,LTB4R,MAPRE2,MIF,MPPE1,MT-CO2,NAP1L4,NUCKS1,OLR1,P4HB,PDIA6,PLIN3,PPIA,PRKAR2B,PSMD6,PXN,RAB8A,RBM3,RPL7,S100A9,SLC16A3,TAGLN2,USO1,VWF,WIPF1,ZYX	46 (18)	16
MGAT1	enzyme		3			-1.673	4.31e-10	0.0346	AGT,Akt,AKT1,AR,Cdc42,Creb,CREB1,CTNNB1,EGFR,ERBB2,ERN1,FAS,FOS,HIF1A,HRAS,IGF1R,JUN,KLF11,KRAS,MAPK1,MAPK8,MGAT1,MTOR,MYD88,NFkB (complex),NFKBIA,P38 MAPK,PTEN,PTK2,RHOA,SMAD2,SP1,STAT5B,STAT6,TGFB1,TP53,TSC2,WBP2,YAP1	ACOT1,ACTB,AHCY,ATP5F1C,ATP6AP1,AVIL,CBFB,CCT3,CCT5,CORO1C,COX6B1,CTSZ,CYCS,DBI,DPP7,EIF4H,ERP29,FABP3,FKBP2,FKBP4,GNB1,GSK3A,HNRNPA2B1,HNRNPC,HNRNPD,HNRNPH1,HNRNPH3,HNRNPM,HSP90B1,HSPA5,HSPD1,HSPE1,HUWE1,ILK,LTB4R,MAPRE2,MIF,MMP25,MMRN1,MPDU1,MPPE1,MT-CO2,MYL12A,NAP1L4,NUCKS1,NUDC,OLR1,P4HB,PABPC1,PDE4D,PDIA6,PGP,PLIN3,PPIA,PPIB,PSMA2,PSMC6,PSMD2,RAB43,RAB8A,RBMX,RELA,RPL7,SEC23A,SEPTIN2,SH3KBP1…	70 (39)	36				EGFR	ITGAV
digitoxin	chemical drug		3	Activated		2.151	4.35e-10	0.0357	AHR,Akt,AKT1,ATP1A1,BAX,CASP3,CCND1,CDKN1A,CEBPA,Creb,CSF2,CTNNB1,cytokine,DICER1,digitoxin,E2F1,EGFR,EIF2AK3,ESR1,HIF1A,HNF4A,HSF1,IKBKB,IKK (complex),IL18,IL1B,IL6,INSR,IRF3,IRF4,JUNB,MAPK8,MYC,NFE2L2,NFkB (complex),NFKB1,NFKBIA,NFKBIB,NR4A1,PARP1,PPARG,PTEN,REL,RELA,RICTOR,SP1,STAT3,STAT4,TP53	ACOT1,ATP5PO,ATP6AP1,CCT5,CD55,CDC42,CNN3,DNAJB1,DSC1,EIF3I,ERP29,FABP3,FABP5,GLRX,GLRX5,GNB1,GSK3A,GSTO1,HINT1,HNRNPH1,HNRNPM,HSPE1,HUWE1,ILK,KHSRP,MAPRE2,MIF,MINPP1,MMP25,MMRN1,MPDU1,MPPE1,MYL12A,NAP1L4,NAPA,NUCKS1,NUDC,NUDT21,OLR1,PABPC1,PDIA6,PGP,PLEK,PLIN3,PPIA,PPIB,PSMA2,PSMC6,PSMD2,PSMD6,PXN,RAB43,RAB5B,RAB8A,RBM3,RELA,SET,SH3KBP1,SLC16A3,SLC44A2,STK4,SYNCRIP,SYTL1,TES,TMOD3,TUBB1,UBE2I,UQ…	70 (49)	45
ursolic acid	chemical drug		2			0.438	4.43e-10	0.0249	HIF1A,MTOR,NFkB (complex),NFKBIA,Pkc(s),RELA,STAT3,TP53,ursolic acid	AHCY,ALDOC,ATP1A1,ATP5F1C,ATP5PO,AVIL,CD55,CD9,CNN3,CTSZ,CYCS,DBI,FCER1G,FKBP4,FUBP1,GSK3A,HSPD1,HUWE1,ILK,ITGA2B,LASP1,LTB4R,MAPRE2,MIF,MPDU1,NAP1L4,NUCKS1,OLR1,P4HB,PDIA6,PGP,PPIA,PPIB,PSMD2,PXN,RAB8A,RBM3,RELA,RPL7,SH3KBP1,SLC16A3,STK4,SYTL1,TAGLN2,USO1,WIPF1,ZYX	47 (9)	9				HK2,MPO,TP53	HIF1A,MTOR,MUC5AC,reactive oxygen species,RORC
neuromelanin	chemical - endogenous mammalian		3			-1.324	4.44e-10	0.0367	AGER,Akt,AKT1,APOA1,AR,CEBPB,CHUK,Creb,EGFR,ERN1,HIF1A,IKBKB,IL10RA,IRF3,JUN,lipopolysaccharide,MAPK1,MTOR,MYD88,neuromelanin,NFkB (complex),NFKB1,NFKBIA,NFKBIB,OSM,PTEN,REL,RELA,RHOA,SP1,STAT3,STAT6,TLR2,TLR4,TLR9,TP53,TP73,XBP1	AHCY,ATP5F1C,ATP5PO,ATP6AP1,AVIL,CCT3,CCT5,CD9,CDC42,CTSZ,DDX17,DHRS7,ERP29,ERP44,FABP3,FKBP2,FKBP4,FUBP1,GLRX3,HINT1,HNRNPA2B1,HNRNPH1,HNRNPH3,HNRNPM,HSPA5,HSPD1,HSPE1,HUWE1,ITGA2B,KHSRP,LTB4R,MAPRE2,MIF,MINPP1,MMP25,MPDU1,MPPE1,NAP1L4,NUCKS1,NUDC,NUDT21,OLR1,PABPC1,PCYT1A,PGP,PLEK,PLIN3,PSMA2,PSMD2,PXN,RAB1B,RAB43,RAB8A,RBM3,RELA,RPL7,S100A9,SEPTIN9,SH3KBP1,SLC16A3,SRI,STK4,SYNCRIP,SYNE2,SYTL1,…	69 (38)	37
MAPK12	kinase		2			1.18	4.44e-10	0.0129	ATF2,DDIT3,EGFR,EIF4E,FOS,KAT5,MAPK12,MMP9,MYOD1,NFE2L2,TP53	ACTB,AHCY,APOE,ATP5F1C,AVIL,CCT3,CCT5,CNN3,CTSZ,CYCS,DBI,ERP29,FABP5,FKBP4,FUBP1,GSK3A,GSTO1,HNRNPA2B1,HNRNPD,HNRNPH1,HSPD1,HSPE1,ILK,ITGA2B,LASP1,LTB4R,MAPRE2,NAP1L4,NUDC,P4HB,PABPC1,PPIA,PPIB,PRKAR2B,PSMA2,PSMD2,PSMD6,RAB8A,RBM3,RPL7,S100A9,SEC23A,TAGLN2,THBS1,UQCRC1,ZYX	46 (11)	10	ANGPT2,anisomycin,cytarabine,EDN1,Insulin,RHOA,TCR	ESR1,KLF3,PTPN4,Top2		CHEK2,JUN,KAT5	EGFR
KLK3	peptidase		3	Inhibited		-2.769	4.69e-10	0.027	26s Proteasome,Akt,AKT1,AR,CDKN1A,CEBPB,Creb,CREB1,CTNNB1,EGFR,ESR1,FOXO1,FOXO3,HIF1A,IL10,IRF3,JAK2,KLK3,KRAS,MAPK8,MST1,MTOR,MYC,NFE2L2,NFkB (complex),NFKB1,NFKBIA,NR4A1,PI3K (complex),PLAU,PLG,RB1,REL,RELA,SREBF1,SREBF2,STAT4,STAT5a/b,TGFB1,TSC2,YAP1	AHCY,ALDOC,ATP5PO,ATP6AP1,AVIL,CBFB,CCT3,CCT5,CDC42,CORO1C,DBI,DPP7,DSC1,EIF4H,FABP3,FABP5,FKBP2,FKBP4,FUBP1,GLRX5,GNB1,GSK3A,GSTO1,HNRNPC,HNRNPD,HNRNPH1,HNRNPM,HSPA5,HUWE1,KHSRP,LASP1,MIF,MINPP1,MMP25,MPDU1,MPPE1,MYL12A,NUCKS1,NUDC,NUDT21,PABPC1,PDE4D,PGLS,PGP,PLEK,PLIN3,PPIA,PRKAR2B,PSMC6,PSMD2,PSMD6,PXN,RAB5B,RBM3,RBMX,RELA,RPL7,S100A9,SAMD9,SEC23A,SET,SRI,STK4,SYTL1,TES,THBS1,TMOD3,UQCRC1,VWF	69 (41)	39	IL4,Insulin,metribolone,mibolerone,POU2F1,rosiglitazone,SMARCA2	apigenin,APP,CREB3,docetaxel,EGFR,ERG,flufenamic acid,mitoxantrone,NDRG1,phenylmethylsulfonyl fluoride,silibinin,SREBF1,TP53,tunicamycin,UXT,Z-LLL-CHO
CSNK2A1	kinase	1.205	2	Inhibited		-2.06	4.73e-10	0.038	Akt,CDH1,CHD4,Creb,CSNK2A1,FOXO1,GMNN,HIF1A,HMGA1,MTDH,NFkB (complex),NFKBIA,RELA,SET,SFPQ,SIRT1,SNAI1,SNCA,THRAP3,TP53	ACTB,AHCY,ALDOC,ATP1A1,ATP5F1C,ATP5PO,CD9,CNN3,CORO1C,CTSZ,CYCS,DBI,DDX17,FABP5,FCER1G,FKBP4,FUBP1,GSK3A,HNRNPH1,HSPD1,HUWE1,ILK,KDM6A,LASP1,LTB4R,MAPRE2,MPDU1,MPPE1,NAP1L4,NT5DC2,NUCKS1,NUDT21,P4HB,PDIA6,PEBP1,PLIN3,PPIA,PRKAR2B,PSMD2,PXN,RAB8A,RBM3,RELA,SEPTIN2,SF1,SH3KBP1,SLC16A3,STK4,SYTL1,TAGLN2,U2AF1/U2AF1L5,UQCRC1,USO1	53 (20)	20	FLT1,methylprednisolone	GABA,NMS-873		AHR,CCDC6,CCNB1,GMNN,HIF1A,MSH6,PDIA6,PRKACB,PRKN,SFPQ	SSRP1
Y 27632	chemical drug		2			1.732	4.75e-10	0.021	26s Proteasome,Akt,AKT1,Cdc42,ERK1/2,EZR,MAPK1,MAPK8,NFkB (complex),P38 MAPK,PI3K (complex),PTEN,RELA,RHOA,ROCK2,SMAD3,STAT3,TGFB1,Y 27632,YAP1	ACTB,CBFB,CCT5,CD55,CD9,CORO1C,CTSZ,DSC1,EIF4H,ERP29,FABP5,FKBP2,FUBP1,HINT1,HNRNPA2B1,HNRNPC,HNRNPH1,HNRNPM,HSP90B1,HSPA5,HSPD1,ILK,LASP1,MIF,MMP25,MPPE1,MYL12A,PDE4D,PRKAR2B,PSMD2,PSMD6,RAB43,RBM3,RELA,SEC23A,SH3KBP1,SLC16A3,SRI,STK4,SYNCRIP,SYTL1,TAGLN2,THBS1,TMOD3,UBE2I,USO1,WIPF1,ZYX	48 (20)	20				SKP2,TP53	arginase,CCN2,DPYSL2,IL23,MPO,reactive oxygen species,RHOA
PRKCA	kinase		2	Inhibited		-2.474	4.79e-10	0.032	ADRB2,AKT1,CDK2,CHUK,CLOCK,Creb,CREB1,EGFR,EIF4E,HMGA1,HSF1,IKBKB,IRF3,JAK2,JUN,MAP3K7,MAPK1,MAPK8,NFkB (complex),NFKBIA,P38 MAPK,PARP1,PI3K (complex),PPARA,PRKCA,PRKG1,RAF1,RARA,RB1,RELA,RGS2,SFPQ,STAT3,TEAD1,TP53,TP73	ATP5F1C,CBFB,CCT3,CD55,CNN3,COX6B1,CTSZ,CYCS,DBI,DNAJB1,ERP29,FABP3,FABP5,FKBP4,FUBP1,GSK3A,HINT1,HNRNPA2B1,HNRNPH1,HNRNPM,HSPE1,ILK,LTB4R,MIF,MPDU1,NAP1L4,NUDC,P4HB,PABPC1,PCYT1A,PDIA6,PGLS,PLIN3,PPIA,PPIB,PRKAR2B,PSMD2,PXN,RAB1B,RAB8A,RBM3,RBMX,RNASEL,RPL7,S100A9,SAMD9,SEC23A,SEPTIN2,SET,SF1,STK4,SYNE2,SYTL1,TAGLN2,TMOD3,U2AF1/U2AF1L5,UBE2I,USO1,WIPF1	59 (36)	36	ATP5F1E,BTK,caffeine,cyclosporin A,dithiothreitol,docetaxel,EDN1,IL4,Insulin,lactacystin,MTOR,Na+,Pif,PLCG1,PRL,proteasome inhibitor PSI,RICTOR,tauroursodeoxycholic acid,TCR,TGM2,TRH	7beta-hydroxycholesterol,bisindolylmaleimide III,bisindolylmaleimide iv,budesonide,N-acetyl-L-cysteine,TRIM41		arginase,CCN2,CIITA,CYBB,EGFR,MUC5AC,NFKB1,PLA2G4A,PRKG1,PTPN11,reactive oxygen species,RGS2,SELP,SFPQ,SMAD1/5,STXBP3,TEAD1	HEY1,HSF1,ID1,JUN
clioquinol	chemical drug		3	Activated		2.425	4.93e-10	0.0321	26s Proteasome,AHR,AKT1,APP,ATF2,BAX,CASP3,CCND1,CEBPA,clioquinol,Creb,CSF2,CXCL12,cytokine,DICER1,HIF1A,HNF4A,HRAS,IL1B,IL6,IRF3,IRF4,KRAS,MAPK8,MMP9,MTOR,NFkB (complex),NFKB1,NFKBIA,P38 MAPK,PARP1,PPARG,PTEN,REL,RELA,RET,SOD1,Tgf beta,TGFB1,TNF,TP53,Trk Receptor,VEGFA	ACOT1,ACTB,APOE,ATP5F1C,AVIL,CBFB,CCT5,CD9,CNN3,CORO1C,COX6B1,DNAJB1,EIF4H,ERP29,FABP3,FABP5,FKBP2,GLRX,GNB1,GSK3A,HNRNPC,HNRNPD,HNRNPH1,HNRNPM,HUWE1,KHSRP,MAPRE2,MIF,MINPP1,MMP25,MMRN1,MPDU1,MYL12A,NAP1L4,NUCKS1,OLR1,PDIA6,PLEK,PLIN3,PPIA,PSMA2,PSMC6,PSMD2,PSMD6,PXN,RAB43,RAB8A,RBM3,RELA,RNASEL,RPL7,SAMD9,SEC23A,SEPTIN7,SF1,SH3KBP1,SLC16A3,SRI,STK4,SYNCRIP,SYTL1,TAGLN2,THBS1,TMOD3,TUBB1,UQCRC1,U…	68 (43)	39				APP,JUN,TP53
FSH	complex		2			1.677	4.99e-10	0.0118	Akt,AKT1,AMPK,CGA,CREB1,CTNNB1,cyclic AMP,CYP19A1,ERK1/2,FAAH,FGF7,FN1,FOS,FSH,FSHB,FSHR,MTOR,Nos,PRKAA2,RARA	AHCY,APOE,APRT,ATP1A1,ATP5PO,AVIL,B2M,CD55,CD9,CDC42,CYCS,FABP5,FKBP2,FKBP4,GSK3A,HNRNPD,HNRNPM,ILK,MAPRE2,MPPE1,MT-CO2,OLR1,P4HB,PDE4D,PDIA6,PGLS,PGP,PLIN3,PPIB,PRKAR2B,PSMA2,PXN,RBMX,RPL7,S100A9,SAMD9,SH3KBP1,SLC16A3,TAGLN2,THBS1,UQCRC1,VWF,ZYX	43 (20)	20	CGA,ESR1,KISS1R,PRL,PROKR2,VIP			ADCYAP1,APP,EGFR,GZMB,JUN,LGALS1,MTOR,PKM,pregnenolone,TF	AHR,CCN2,COPS5,FN1,ID1,mir-10,miR-30c-5p (and other miRNAs w/seed GUAAACA),SMAD7,TP53
HEXIM1	transcription regulator		2			0.457	5.06e-10	0.0043	ESR1,HEXIM1,TP53	AHCY,APOE,ATP1A1,ATP5F1C,CDC42,CNN3,DBI,DSC1,FABP5,FKBP4,FUBP1,GNB1,GSK3A,HNRNPD,HSP90B1,HSPA5,HSPD1,ILK,LASP1,MAPRE2,MT-CO2,NAP1L4,OLR1,P4HB,PDIA6,PGLS,PSMD2,RAB5B,RAB8A,RBM3,RELA,RPL7,SAMD9,SLC16A3,SLC44A2,STK4,TAGLN2,THBS1,TMOD3,UBE2I,UQCRC1,USO1,ZYX	43 (3)	2	5-azacytidine,CGA			TP53	AKR1C3,ESR1,HIF1A
SIRT7	enzyme		2			1.474	5.17e-10	0.0233	Akt,HIF1A,MTOR,MYC,SIRT7,TP53	ACTB,ALDOC,ATP1A1,ATP5F1C,ATP5PO,AVIL,CCT3,CNN3,COX6B1,DBI,FKBP4,FUBP1,GLRX5,GSK3A,HNRNPA2B1,HNRNPD,HNRNPH1,HSP90B1,HSPE1,HUWE1,ILK,LASP1,LTB4R,MAPRE2,MIF,MPPE1,MT-CO2,NAP1L4,NUCKS1,NUDT21,OLR1,P4HB,PDIA6,PGP,PPIA,PPIB,PRKAR2B,PSMD2,RAB8A,RBM3,RPL7,TES,UBE2I,UQCRC1,USO1,ZYX	46 (6)	5		D-glucose		MTOR,RPS6KB1	HIF1A,TP53
radgocitabine	chemical drug		3	Inhibited		-2.188	5.27e-10	0.0173	CDC25C,CDK2,CDKN1A,CHEK1,cytarabine,E2F1,E2F3,EGFR,MDM4,NFkB (complex),P38 MAPK,radgocitabine,RASSF1,RB1,RELA,STAT3,TP53,YWHAZ	AHCY,APOE,ATP5F1C,CCT5,CD55,CNN3,COX6B1,DBI,EIF3I,FABP5,FCER1G,FKBP4,FUBP1,GSK3A,GSTO1,HNRNPA2B1,HNRNPD,HNRNPH1,HSP90B1,HSPD1,ITGA2B,LASP1,LTB4R,MAPRE2,MIF,NAP1L4,NUCKS1,P4HB,PABPC1,PCYT1A,PDIA6,PPIA,PXN,RAB8A,RBM3,RELA,RPL7,SH3KBP1,SLC16A3,STK4,SYTL1,TAGLN2,TUBB1,UQCRC1,USO1,WIPF1,ZYX	47 (18)	15				CHEK1
NACC1	transcription regulator		3			-0.143	5.39e-10	0.032	Akt,AKT1,ATF2,EIF4EBP1,IFNA2,IFNB1,IKBKB,IRF3,JUN,MTOR,NACC1,NFkB (complex),NFKBIA,P38 MAPK,PEBP1,REL,RELA,STAT1,TBK1,TP53,YAP1	ACTB,AHCY,ATP1A1,ATP5F1C,AVIL,B2M,CD55,CNN3,CTSZ,CYCS,DBI,FCER1G,FKBP4,FUBP1,GSK3A,HNRNPA2B1,HNRNPM,HSPD1,LASP1,LTB4R,MAPRE2,MIF,MINPP1,MMP25,MPDU1,MPPE1,MT-CO2,NAP1L4,P4HB,PDIA6,PGP,PPIB,PRKAR2B,PSMD2,PXN,RAB8A,RBM3,RELA,RNASEL,RPL7,SAMD9,SH3KBP1,SLC16A3,STK4,SYTL1,TAGLN2,UQCRC1,USO1,ZYX	49 (21)	20				TBK1,TP53
XBP1	transcription regulator		2			-0.457	5.71e-10	0.0079	Akt,CEBPA,corticosterone,ERK1/2,ERN1,ESR1,IRS2,NFkB (complex),NFKBIA,P38 MAPK,PRKCE,RELA,XBP1	ATP1A1,B2M,CD55,CDC42,CTSZ,CYCS,DSC1,ERP29,ERP44,FABP5,FKBP2,GLRX,GNB1,GSK3A,HNRNPD,HSP90B1,HSPA5,HSPD1,ITGA2B,LTB4R,MIF,MMRN1,MPDU1,MPPE1,MT-CO2,OLR1,P4HB,PCYT1A,PDIA6,PGLS,PPIB,RAB5B,RELA,S100A9,SAMD9,SEC23A,SH3KBP1,SLC44A2,SYTL1,TBCB,TMOD3,UBE2I,USO1	43 (13)	13	1,2-dithiol-3-thione,arsenic trioxide,CEBPD,cholesterol,CYBB,D-glucose,eprenetapopt,ERVW-1,farnesol,GPAT4,HSPA1A/HSPA1B,IL4,IL5,Insulin,MMP11,thapsigargin,tunicamycin,Z36	4-phenylbutyric acid,ascorbic acid,BACH2,BCL6,crocin,OPA1,RPL22,SDF4,SPOP,U18666A,YWHAZ		APOA1,CDK5RAP3,COL4A2,CREB3L1,Cyclin A,CYP1A2,ESR1,Pdi,PDIA6,PRNP,SEC23B,SYVN1,TXN	APP,FN1
NMS-873	chemical reagent		2			1.021	5.74e-10	0.0257	BAX,CCND1,CSNK2A1,DUSP1,KRAS,MYC,NMS-873,PARP1,PRKAR1A,RTN4,SQSTM1,TARDBP,TP53	ACTB,APOE,ATP1A1,ATP5F1C,B2M,CCT3,CDC42,CNN3,COX6B1,CYCS,DBI,FABP5,FKBP4,FUBP1,GLRX5,GSK3A,HNRNPA2B1,HNRNPD,HNRNPH1,HSPE1,ILK,ITGA2B,LTB4R,MAPRE2,MIF,MT-CO2,NAP1L4,NUDT21,P4HB,PDIA6,PPIA,PRKAR2B,PSMC6,PSMD2,RAB8A,RBM3,RELA,RPL7,S100A9,SLC16A3,TES,TMOD3,TUBB1,UQCRC1,USO1,VPS4B,ZYX	47 (13)	12					BUB3,CHEK1,CSNK2A1,PSMC3,PSMD4,TP53,UBR5,USP5,VCP
MEFV	other		3			0.267	5.78e-10	0.0313	AHR,CASP1,CCND1,CEBPA,CSF2,cytokine,HIF1A,HNF4A,IKBKB,IL18,IL33,IL6,IRF3,IRF4,JUN,MEFV,NFkB (complex),NFKB1,NFKBIA,NOS2,PPARG,REL,RELA,SP1,STAT1,STAT3,STAT4,TP53	ACOT1,APOE,ATP5F1C,ATP5PO,CD9,CNN3,CYCS,DNAJB1,FABP3,FABP5,FCER1G,FKBP4,FUBP1,GLRX,GSK3A,HINT1,HNRNPA2B1,HSPD1,HSPE1,HUWE1,ILK,KHSRP,MAPRE2,MINPP1,MMP25,MMRN1,MPDU1,NAP1L4,NUCKS1,OLR1,PGP,PLEK,PLIN3,PPIA,PPIB,PRKAR2B,PSMA2,PSMD2,PXN,RAB8A,RBM3,RELA,RPL7,SET,SF1,SH3KBP1,SLC16A3,STK4,SYTL1,TAGLN2,TUBB1,UBE2I,UQCRC1,USO1,VWF,WIPF1	56 (28)	26	BHLHE40,dimethyl sulfoxide	IL4,MTOR,RHOA
NLRC3	other		3			0.267	5.78e-10	0.0309	AHR,CASP1,CCND1,CEBPA,CSF2,cytokine,HIF1A,HNF4A,IKBKB,IL18,IL33,IL6,IRF3,IRF4,JUN,NFkB (complex),NFKB1,NFKBIA,NLRC3,NOS2,PPARG,REL,RELA,SP1,STAT1,STAT3,STAT4,TP53	ACOT1,APOE,ATP5F1C,ATP5PO,CD9,CNN3,CYCS,DNAJB1,FABP3,FABP5,FCER1G,FKBP4,FUBP1,GLRX,GSK3A,HINT1,HNRNPA2B1,HSPD1,HSPE1,HUWE1,ILK,KHSRP,MAPRE2,MINPP1,MMP25,MMRN1,MPDU1,NAP1L4,NUCKS1,OLR1,PGP,PLEK,PLIN3,PPIA,PPIB,PRKAR2B,PSMA2,PSMD2,PXN,RAB8A,RBM3,RELA,RPL7,SET,SF1,SH3KBP1,SLC16A3,STK4,SYTL1,TAGLN2,TUBB1,UBE2I,UQCRC1,USO1,VWF,WIPF1	56 (28)	26		mir-190
IL12R	group		3			-0.258	6e-10	0.0464	AKT1,ESR1,GATA3,IFNG,IKBKB,IL12 (complex),IL12R,IL12RB1,IL12RB2,JAK,JAK2,JUN,MAP2K6,MYOD1,NFAT5,NFE2L2,NFkB (complex),PI3K (complex),PITX2,SNAI1,STAT3,STAT4,STAT5a/b,STAT5B,STAT6,TP53,TP73,VDR	ACOT1,ALDOC,ATP5F1C,CCT3,CD9,CDC42,Cryzl2,CYCS,DBI,DSC1,ERP29,FABP3,FABP5,FKBP4,FUBP1,GNB1,GSK3A,GSTO1,HNRNPA2B1,HNRNPD,HNRNPH3,HNRNPM,ILK,LASP1,MAPRE2,MMRN1,MSRA,NAP1L4,OLR1,P4HB,PEBP1,PGLS,PGP,PLEK,PPIA,PPIB,PRKAR2B,PSMA2,PSMD2,PXN,RAB5B,RAB8A,RBM3,RELA,RPL7,S100A9,SEC23A,SET,SLC44A2,STK4,SYNE2,TAGLN2,TES,TMOD3,TUBB1,UBE2I,UQCRC1,USO1,WIPF1,ZYX	60 (28)	24	Immunoglobulin
MED12	transcription regulator		3			1.089	6.07e-10	0.0228	ADCY,Akt,AR,CCNC,CDK19,CDK8,Creb,cyclic AMP,E2F1,ERN1,Histone h3,MED12,MED13,MTOR,Pka,RELA,RNA polymerase II,RUVBL1,SMAD2,SP1,STAT5a/b,STK11,TGFB1,TGFBR1,TP53	AHCY,ALDOC,ATP1A1,ATP6AP1,CBFB,CCT3,CCT5,CDC42,CORO1C,CYCS,DBI,EIF3I,EIF4H,FKBP2,FKBP4,GSK3A,HNRNPC,HNRNPH1,HSPD1,HSPE1,ILK,ITGA2B,LTB4R,MAPRE2,MPPE1,MYL12A,NAP1L4,NUCKS1,NUDC,OLR1,P4HB,PCYT1A,PDE4D,PDIA6,PGP,PLIN3,PPIA,PPIB,PRKAR2B,PSMD2,RAB8A,RPL7,SH3KBP1,SLC16A3,SRI,STK4,SYTL1,TAGLN2,TBCB,THBS1,TMOD3,TUBB1,UQCRC1,VWF	54 (25)	20
ITM2B	other		3	Inhibited		-3.086	6.07e-10	0.0091	Akt,ARG1,C3,C5,CASP8,CDK2,CFB,EGFR,ERBB2,ERK,FOXO1,ITM2B,JUN,MAC,MAPK1,NFkB (complex),PARP1,PI3K (complex),PNPLA8,RHOA,SP1,SRC (family),SYK,ZAP70	ACTB,ALDOC,APOE,ATP1A1,CCT5,CD55,CDC42,CYCS,ERP29,FABP5,FCER1G,GSK3A,HINT1,HNRNPA2B1,HNRNPD,HNRNPH1,HSP90B1,HSPA5,HSPD1,HSPE1,ITGA2B,LASP1,LTB4R,MPPE1,MT-CO2,NUDC,OLR1,PABPC1,PCYT1A,PPIA,PRKAR2B,PXN,RBM3,RCSD1,S100A9,SF1,SLC16A3,THBS1,TMOD3,UBE2I,VPS4B,WIPF1	42 (24)	23		CD 437,ST1926			APP
lanthanum chloride	chemical reagent		3			0.849	6.09e-10	0.0145	AKT1,AR,CASR,CTNNB1,EGFR,JAK2,JUN,lanthanum chloride,NFkB (complex),Nos,P38 MAPK,PI3K (complex),PIK3R1,PLCG1,PTK2B,RHOA,SNCA,STAT3,STAT5B,SYK,TP53	ACOT1,ACTB,AHCY,ALDOC,ATP1A1,ATP5F1C,ATP5PO,ATP6AP1,CCT3,CCT5,CD55,CD9,COX6B1,CYCS,DBI,FUBP1,GSK3A,HNRNPA2B1,HNRNPD,HNRNPH1,HNRNPM,HSPD1,HSPE1,ILK,LTB4R,MAPRE2,MMRN1,NAP1L4,NUDC,OLR1,P4HB,PABPC1,PDIA6,PLIN3,PPIA,PRKAR2B,PSMD2,PXN,RAB8A,RBM3,RCSD1,RELA,RPL7,S100A9,SET,SLC16A3,TAGLN2,USO1,VWF,ZYX	50 (21)	19					reactive oxygen species
NEK1	kinase		3			-1.697	6.37e-10	0.0356	Akt,CXCR4,ERK1/2,HIF1A,IRF3,ME1,MYC,NEK1,SMAD3,STAT3,TAZ,TEAD1,TP53,VEGFA,VHL	ACTB,ALDOC,ATP1A1,B2M,CBFB,CCT3,CD55,CD9,CDC42,CNN3,COX6B1,DBI,FABP3,FCER1G,FKBP4,FUBP1,GLRX5,HNRNPA2B1,HNRNPD,HNRNPH1,HSPE1,HUWE1,ILK,LASP1,LTB4R,MAPRE2,MIF,MMP25,MPPE1,NAP1L4,NUCKS1,NUDT21,P4HB,PDIA6,PPIA,PRKAR2B,PSMD2,PSMD6,RAB8A,RBM3,RPL7,SET,STK4,TES,THBS1,UBE2I,UQCRC1,USO1,WIPF1,ZYX	50 (15)	13	ESR1
Co2+	chemical - endogenous mammalian		3			-0.577	6.41e-10	0.0006	BID,CASP8,Co2+,CTSD,DPP3,HIF1A,MYH9,NFE2L2,PRKAA,RHOA,Smad2/3,TRPM7	ALDOC,APOE,ATP1A1,ATP5PO,CBFB,CCT3,ERP29,GSTO1,HSP90B1,HSPA5,HSPD1,HUWE1,ILK,ITGA2B,MT-CO2,NUCKS1,PDIA6,PPIA,PPIB,PRKAR2B,PXN,RELA,S100A9,SEC23A,SLC16A3,UQCRC1,USO1	27 (12)	8				CA9,NDRG1	ascorbic acid,TRPM7
pregnenolone	chemical - endogenous mammalian		3			0.775	6.43e-10	0.0171	AR,CHUK,CREB1,CRH,cyclic AMP,EGFR,ERBB2,ERN1,ESR1,FAAH,HIF1A,HNF4A,IKBKB,IL10RA,IL6,JUN,MAPK7,MTOR,NCOA2,NFKB1,NFKBIA,NR1I2,NR3C2,NR4A1,PI3K (complex),PLCG1,pregnenolone,PRKCA,SP1,SREBF2,STUB1,TIRAP,TLR2,XBP1	ACOT1,ACTB,AHCY,ALDOC,ATP5PO,ATP6AP1,AVIL,CCT3,CCT5,COX6B1,CTSZ,CYCS,DBI,DNM3,DSC1,ERP44,FABP5,FKBP2,GLRX,GNB1,GSK3A,GSTO1,HINT1,HNRNPA2B1,HNRNPH1,HSPA5,HSPE1,HUWE1,ITGA2B,KHSRP,LASP1,MMP25,MPDU1,MT-CO2,NUCKS1,NUDC,OLR1,P4HB,PABPC1,PDIA6,PGLS,PGP,PLEK,PPIA,PPIB,PRKAR2B,RAB5B,RBMX,RELA,RPL7,SAMD9,SEC23A,SLC44A2,TBCB,THBS1,TMOD3,UQCRC1,USO1,VWF,WIPF1	60 (34)	31	FSH,LCAT,PRL	APP,hydroxypropyl-beta-cyclodextrin
IL13	cytokine		2	Inhibited		-2.364	6.47e-10	0.0458	Akt,AKT1,ARG1,CASP8,EGFR,FOS,GPX4,IL11,IL13,IL1B,IRS2,JAK2,JUN,LIF,MMP3,MTOR,NOS2,NR3C1,P38 MAPK,PI3K (complex),PPARG,SRC (family),STAT3,STAT6,TGFB1,TNF	ACTB,ATP1A1,ATP5PO,AVIL,CBFB,CCT5,CD55,CNN3,CORO1C,CTSZ,CYCS,DBI,EIF4H,ERP44,FABP3,FKBP2,FKBP4,FUBP1,GSK3A,HINT1,HNRNPC,HNRNPD,HNRNPH1,HNRNPH3,HNRNPM,HSPD1,HSPE1,ILK,LASP1,LTB4R,MPPE1,MYL12A,NUDC,NUDT21,P4HB,PABPC1,PCYT1A,PDE4D,PDIA6,PGP,PLIN3,PPIA,PPIB,PRKAR2B,RBM3,S100A9,SAMD9,SET,SRI,SYNCRIP,SYTL1,TES,THBS1,TMOD3,USO1,VWF,WIPF1,ZYX	58 (26)	26	APP,ARRB2,BHLHE40,BIRC5,BTK,C5AR1,CD28,CD3,chrysotile asbestos,F2,IL5,muromonab-CD3,NFIL3,NFKB1,PRNP,rosiglitazone,SKP2,Stat3-Stat3,TCR,TRAF4	AHR,arsenic,BACH2,BATF,BCL6,budesonide,CIITA,cyclosporin A,fisetin,lactacystin,TNFSF10		5-hydroxytryptamine,ACKR3,ADORA2A,arginase,CCN2,ERBB4,FKBP1A,JUN,MUC5AC,NFE2,PLA2G4A,RHOA,SELP,TGM2	CD247,CXCR4,CYBB,D-glucose,GPX4,mir-1,RORC
PARK7	enzyme	-1.719	2			-0.926	6.5e-10	0.0118	Akt,AKT1,BCL2L1,ERK1/2,HIF1A,PARK7,PTEN,TP53	AHCY,ALDOC,ATP1A1,ATP5F1C,ATP5PO,B2M,CNN3,CYCS,DBI,FABP5,FKBP4,FUBP1,GSK3A,HNRNPM,HSPD1,HUWE1,ILK,LASP1,LTB4R,MAPRE2,MIF,MPPE1,NAP1L4,NUCKS1,P4HB,PDIA6,PPIA,PRKAR2B,PSMD2,PXN,RAB43,RAB8A,RBM3,RELA,RPL7,SEC23A,SLC16A3,SYNCRIP,TAGLN2,UQCRC1,USO1,ZYX	42 (8)	7	4-phenylbutyric acid,D-glucose,geldanamycin	GABA,tetraethylammonium		EGFR,HIF1A,IL23,levodopa,TXN	5-hydroxytryptamine,glutathione peroxidase,reactive oxygen species
PAXIP1	other		2			0.164	6.54e-10	0.0036	CEBPA,PAXIP1,TP53	AHCY,APOE,ATP1A1,ATP5F1C,CNN3,CYCS,DBI,FABP5,FKBP4,FUBP1,GLRX,GSK3A,HSPA5,HSPD1,ILK,ITGA2B,LASP1,LTB4R,MAPRE2,MMRN1,MT-CO2,NAP1L4,OLR1,P4HB,PDIA6,PSMD2,RAB8A,RBM3,RELA,RPL7,S100A9,TAGLN2,THBS1,UBE2I,UQCRC1,USO1,ZYX	37 (3)	2	metribolone			TP53
STK38L	kinase		3			-1.857	6.67e-10	0.0133	CASP8,COL18A1,EGFR,HIF1A,IGF1R,IRF3,IRS2,ITGB1,MAPK1,MTOR,NUAK1,P38 MAPK,PI3K (family),PIK3R1,PLAU,PLCG2,STAT3,STAT5a/b,STK38L,SYK,TP53,TP73,YAP1	ACTB,AHCY,ALDOC,ATP1A1,ATP5F1C,AVIL,CCT5,CD9,CDC42,CNN3,COX6B1,DBI,ERP29,FABP5,FKBP4,FUBP1,GSK3A,HNRNPD,HNRNPH1,HSPE1,HUWE1,ILK,LTB4R,MIF,MMP25,NAP1L4,NUCKS1,NUDC,P4HB,PABPC1,PDIA6,PGP,PPIA,PPIB,PSMD2,PXN,RAB8A,RBM3,RCSD1,RPL7,S100A9,SLC16A3,STK4,SYNE2,TAGLN2,TUBB1,UBE2I,USO1,VWF	49 (23)	21	MOB1A
IgG	complex		2	Inhibited		-3.063	6.73e-10	0.0372	Akt,Creb,CTNNB1,EGFR,EIF2AK3,IgG,MAPK1,NFkB (complex),NFKBIA,P38 MAPK,RELA,RICTOR,SRC (family),STAT5a/b,SYK,TLR4,ZAP70	APOE,ATP1A1,ATP1B3,ATP5F1C,ATP6AP1,B2M,CCT5,CD55,CD9,COX6B1,CTSZ,ERP29,FABP5,HNRNPA2B1,HNRNPD,HNRNPH1,HSP90B1,HSPA5,HSPE1,ITGA2B,MIF,MPDU1,MPPE1,NAPA,NUDC,PABPC1,PLEK,PLIN3,PPIA,PRKAR2B,PSMA2,PSMC6,PSMD2,PSMD6,RBM3,RCSD1,RPL7,SH3KBP1,SLC16A3,SYTL1,THBS1,TUBB1,UBE2I,USO1,VPS4B,VWF,WIPF1	47 (17)	17	BCL6,CIITA,MTOR,PTTG1,TBK1	ADORA2A,bortezomib,CD28,dichloroacetic acid,N-acetyl-L-cysteine,SELP,TNFSF10,VIP		EGFR,EIF2AK3,FLT1,FN1,HIF1A,KLF3,LCN2,reactive oxygen species	AFM,APP,BIRC5,CEBPD,CSNK2B,EDN1,LGALS1,Na+,RICTOR,TRIM29
F2R	G-protein coupled receptor		2	Inhibited		-3.571	6.75e-10	0.0385	ADCY,AKT1,Creb,EGFR,ERBB2,ERK,F2R,GNA12,ITGB3,PAK2,PI3K (complex),PIK3R1,RELA,RHOA,SRF,STAT3,TAZ,TGFB1,YAP1	ALDOC,ATP1A1,CBFB,CCT5,CD55,CDC42,CNN3,CORO1C,EIF4H,FABP5,FKBP2,FUBP1,HINT1,HNRNPA2B1,HNRNPC,HNRNPD,HNRNPH1,HNRNPM,HSP90B1,HSPD1,HSPE1,ILK,ITGA2B,LASP1,MIF,MMP25,MYL12A,NUDC,OLR1,PABPC1,PDE4D,PLIN3,PPIA,PRKAR2B,PSMD6,PXN,RBM3,S100A9,SH3KBP1,SRI,STK4,SYTL1,THBS1,TMOD3,TUBB1,USO1,VWF,WIPF1,ZYX	49 (19)	19	5-hydroxytryptamine,COPS5,F2,GRK5,GZMA,GZMB,PSEN1,PSEN2,Serine Protease,SFLLRN (PAR1-activator),TFLLR,TRH	Ap2,ARRB2,bivalirudin,IL4,SERPIND1		AKT3,ANGPT2,CCN2,FLT1,FN1,ITGA2B,RGS18,RHOA,SELP,STXBP3,TGM2,VWF	ESR1,KRT19,Na+
RALGPS1	other		3			0.152	7.06e-10	0.0141	26s Proteasome,Akt,CDK2,CDKN1A,FOXO4,HIF1A,JUN,PLAU,RALA,RALGPS1,SIRT1,TP53	AHCY,ALDOC,ATP1A1,ATP5F1C,ATP5PO,CD9,CNN3,DBI,FABP5,FKBP4,FUBP1,GSK3A,GSTO1,HNRNPA2B1,HSP90B1,HSPA5,HSPD1,HUWE1,ILK,ITGA2B,LASP1,LTB4R,MAPRE2,MIF,MPPE1,NAP1L4,NUCKS1,P4HB,PCYT1A,PDIA6,PPIA,PRKAR2B,PSMD2,PSMD6,RAB8A,RBM3,RPL7,S100A9,SLC16A3,TAGLN2,UBE2I,USO1,ZYX	43 (12)	10		GnRH analog,RNF114
APEX1	enzyme	1.131	2			-0.949	7.08e-10	0.0077	Ap1,APEX1,Hif1,HIF1A,NFKB1,SIRT1,temozolomide,TP53	AHCY,ALDOC,ATP1A1,ATP5F1C,ATP5PO,CD9,CNN3,CYCS,DBI,FABP5,FKBP4,FUBP1,GSK3A,HSP90B1,HSPD1,HUWE1,ILK,KHSRP,LASP1,LTB4R,MAPRE2,MIF,MT-CO2,NAP1L4,NUCKS1,P4HB,PDIA6,PPIA,PRKAR2B,PSMD2,RAB8A,RBM3,RPL7,SLC16A3,SYTL1,TAGLN2,THBS1,UQCRC1,USO1,ZYX	40 (8)	7	arsenite,JUN,KAT5,methylprednisolone,Mg2+,reactive oxygen species	GZMA,PTTG1		HIF1A,IL4,NFKB1,RGS2	temozolomide
Scf skp2	complex		3			0.391	7.16e-10	0.0401	Akt,AKT1,BRCA1,CCND1,CDC34,CDKN1A,CDKN1B,CUL1,E2F1,EIF2AK3,ERBB2,estrogen receptor,HRAS,HSF1,IL2,JUN,MAPK1,MYC,MYOD1,NFKBIA,PDX1,PRKAA1,PRKCA,RAF1,RB1,RBL2,RELA,Scf skp2,SKP1,SKP2,SMAD3,SMAD4,STAT3,TOB1,TP53	ALDOC,ATP1A1,ATP5F1C,B2M,CBFB,CCT3,CCT5,CD55,CD9,CNN3,COX6B1,CTSZ,DBI,DNAJB1,DPP7,EIF3I,ERP29,FUBP1,GLRX5,GNB1,GSK3A,GSTO1,HNRNPA2B1,HNRNPD,HNRNPH1,HNRNPM,HSP90B1,HSPA5,HSPE1,HUWE1,ILK,LTB4R,MAPRE2,MMP25,MPDU1,MPPE1,MT-CO2,NAP1L4,NAPA,NUDC,NUDT21,P4HB,PDIA6,PPIA,PRKAR2B,PSMD2,RAB8A,RBM3,RNASEL,RPL7,S100A9,SH3KBP1,STK4,SYTL1,TES,THBS1,TUBB1,WIPF1,ZYX	59 (35)	29
SH3GL1	other	-1.541	3			1.443	7.24e-10	0.0292	Akt,Ap1,ARG1,CCND1,CSF2,CXCL12,ERK1/2,FOS,HBEGF,IGF1,IL2,JUN,MAPK1,MMP14,P38 MAPK,RHOA,SH3GL1,STAT3,TGFB1	APOE,B2M,CBFB,CCT5,CD55,CNN3,CORO1C,CYCS,EIF4H,ERP29,FABP5,FCER1G,FKBP2,FUBP1,GSK3A,HINT1,HNRNPA2B1,HNRNPC,HNRNPD,HNRNPH1,HSP90B1,HSPD1,ILK,ITGA2B,LTB4R,MIF,MMP25,MPPE1,MYL12A,PCYT1A,PDE4D,PEBP1,PLEK,PSMA2,PXN,S100A9,SEC23A,SEPTIN7,SF1,SLC16A3,SRI,TMOD3,TUBB1,UBE2I,USO1,VWF,WIPF1,ZYX	48 (19)	17		GABA,mir-122,PTPRR
RSL3	chemical reagent		3	Inhibited		-2.101	7.39e-10	0.0389	26s Proteasome,beta-estradiol,EGFR,EIF2AK3,ERN1,ESR1,fulvestrant,GPX4,IREB2,MAPK1,NCOA1,NCOA2,NR3C1,Pka,RSL3,STAT3,tamoxifen,TP53	ACOT1,AHCY,ATP1A1,ATP5F1C,ATP6AP1,CCT5,CD55,CD9,CDC42,CNN3,CYCS,DBI,DSC1,ERP29,ERP44,FABP3,FKBP4,FUBP1,GNB1,GSK3A,GSTO1,HNRNPA2B1,HNRNPD,HNRNPH1,HSPE1,LASP1,LTB4R,MAPRE2,MMRN1,NAP1L4,NAPA,NT5DC2,NUDC,P4HB,PABPC1,PDE4D,PDIA6,PGLS,PPIA,PPIB,PSMD2,PSMD6,RAB11FIP1,RAB5B,RAB8A,RBM3,RNASEL,RPL7,SAMD9,SET,SLC44A2,TBCB,TMOD3,U2AF1/U2AF1L5,UBE2I,UQCRC1,VWF,ZYX	58 (18)	17				reactive oxygen species	GPX4
S-equol	chemical drug		2			-1.896	7.42e-10	0.0125	Akt,ESR1,ESR2,KAT5,S-equol,TP53	AHCY,ATP1A1,ATP5F1C,CCT3,CDC42,CNN3,DBI,DSC1,FABP5,FKBP4,FUBP1,GNB1,GSK3A,HNRNPD,HSP90B1,HSPA5,ILK,ITGA2B,LASP1,LTB4R,MAPRE2,MPPE1,MYL12A,NAP1L4,OLR1,P4HB,PABPC1,PDIA6,PGLS,PSMD2,PSMD6,RAB5B,RAB8A,RBM3,RPL7,SAMD9,SLC16A3,SLC44A2,STK4,SYNCRIP,TAGLN2,THBS1,TMOD3,UBE2I,UQCRC1,USO1,ZYX	47 (6)	5				ESR1,NQO1,TP53	D-glucose,KAT5
PINK1	kinase		2	Activated		2.353	7.7e-10	0.0003	BAX,BCL2L1,EGFR,EIF4EBP1,HIF1A,PARP1,PINK1,PRKN,TRAP1	ACTB,ALDOC,APOE,ARHGAP10,ATP5PO,CCT5,CYCS,FUBP1,HNRNPA2B1,HNRNPD,HNRNPH1,HSP90B1,HSPD1,HSPE1,HUWE1,ITGA2B,MIF,MT-CO2,NUCKS1,NUDC,PABPC1,PDIA6,PRKAR2B,SLC16A3,TMOD3,UQCRC1	26 (9)	8	D-glucose	TP53		CCNB1,DNM1L,HIF1A,PRKN	EGFR
5,5'-dithiobis(2-nitrobenzoic acid)	chemical reagent		3			1.857	7.95e-10	0.027	5,5'-dithiobis(2-nitrobenzoic acid),AHR,Akt,AKT1,CASP8,CXCL12,EGFR,F2R,IGF1R,ITGA2B,ITGB3,MMP1,MTOR,NFkB (complex),PI3K (complex),PLCG2,REL,STAT6,SYK,TP53	AHCY,ATP1A1,ATP5F1C,ATP5PO,AVIL,CCT5,CD9,CDC42,CNN3,DBI,DNAJB1,FKBP4,FUBP1,GSK3A,HNRNPA2B1,HNRNPD,HNRNPH1,HNRNPH3,HNRNPM,HSPD1,HSPE1,ILK,LASP1,LTB4R,MAPRE2,MINPP1,MMP25,MPPE1,NAP1L4,NUDC,OLR1,P4HB,PABPC1,PGP,PPIA,PPIB,PSMD2,PXN,RAB8A,RBM3,RCSD1,RPL7,S100A9,SEPTIN7,TAGLN2,TES,USO1,VWF,ZYX	49 (20)	17					ITGA2B,LCAT
BR101801	chemical drug		3			1.871	7.99e-10	0.0374	Akt,AKT1,AKT3,AR,BR101801,ESR1,FOS,FOXO3,Hsp90,JUN,KAT2A,NFKBIA,PI3K (complex),PIK3CD,PIK3R1,PLCG2,PRKDC,PTEN,REL,SNAI1,STK11,TP53	ATP1A1,ATP5F1C,ATP6AP1,AVIL,CCT3,CD55,CD9,CDC42,CTSZ,CYCS,DBI,DNAJB1,DSC1,FABP5,FUBP1,GNB1,GSK3A,HNRNPD,HNRNPM,HSP90B1,HSPA5,HSPE1,ILK,LASP1,LTB4R,MAPRE2,MINPP1,MPDU1,MPPE1,NAP1L4,NUDC,P4HB,PDIA6,PEBP1,PGLS,PRKAR2B,PSMA2,PSMD2,PXN,RAB43,RAB5B,RAB8A,RBM3,RPL7,S100A9,SAMD9,SEC23A,SLC16A3,SLC44A2,STK4,SYNCRIP,TAGLN2,UBE2I,USO1,WIPF1,ZYX	56 (22)	20
elastase	group		3	Inhibited		-2.528	8.13e-10	0.0248	AHR,AKT1,APP,C3,C5,CCND1,CDH1,CEBPA,Creb,CSF2,CTNNB1,CXCL12,EGFR,ELANE,elastase,ERBB2,ETS,HIF1A,HNF4A,IGF1R,IL6,IRF3,IRF4,MAPK1,Mmp,MMP1,MMP12,MMP2,MMP3,MMP8,MMP9,MTOR,NFkB (complex),NFKB1,NFKBIA,PPARG,REL,RELA,STAT5a/b,STK11,TGFB1,TLR4,TNF,TP53,VEGFA	ACOT1,ACTB,APOE,AVIL,CBFB,CCT5,CD55,CDC42,CNN3,CORO1C,DNAJB1,EIF4H,ERP29,FABP3,FABP5,FKBP2,FKBP4,FUBP1,GLRX,GSK3A,HNRNPC,HNRNPH1,HNRNPM,HSPA5,HUWE1,ITGA2B,KHSRP,LTB4R,MAPRE2,MINPP1,MMP25,MMRN1,MPDU1,MYL12A,NAP1L4,NUCKS1,NUDC,NUDT21,OLR1,PABPC1,PDE4D,PDIA6,PLEK,PLIN3,PPIA,PSMA2,PSMD2,PXN,RAB8A,RBM3,RELA,RNASEL,RPL7,SAMD9,SEPTIN7,SET,SF1,SH3KBP1,SLC16A3,SRI,STK4,SYNCRIP,SYTL1,TAGLN2,THBS1,TUBB1,UBE…	69 (45)	39	PKM	phenylmethylsulfonyl fluoride,ulinastatin		ETS,PSEN1
CYP2C9	enzyme	27.176	3	Inhibited		-2.5	8.49e-10	0.017	9,10-dimethyl-1,2-benzanthracene,AHR,AKT1,BAX,benzo(a)pyrene,CCND1,CDKN1A,CHUK,CREB1,CYP2C9,diclofenac,E2F1,EGFR,EIF2AK3,ESR1,glucocorticoid,HIF1A,HNF4A,HSF1,IRF3,JAK2,JUNB,losartan potassium,MAPK8,MYC,NFE2L2,NR4A1,PPARG,RELA,RICTOR,SMAD3,STAT5a/b,testosterone,TGFB1,TP53	ACOT1,APOE,ATP1A1,ATP6AP1,CCT5,CDC42,CNN3,CORO1C,CTSZ,DBI,DNAJB1,DSC1,EIF3I,EIF4H,FABP3,FKBP2,GLRX5,GSK3A,GSTO1,HINT1,HNRNPC,HNRNPH1,HNRNPM,HSPA5,HSPE1,HUWE1,LTB4R,MAPRE2,MIF,MMP25,MYL12A,NAP1L4,NAPA,NUCKS1,NUDC,NUDT21,OLR1,PABPC1,PDE4D,PDIA6,PPIA,PPIB,PSMA2,PSMC6,PSMD2,PSMD6,RAB5B,RAB8A,RBM3,RBMX,S100A9,SEC23A,SET,SF1,SH3KBP1,SLC44A2,SRI,STK4,SYTL1,TES,TMOD3,TUBB1,VWF,ZYX	64 (35)	32	avasimibe,dimethyl sulfoxide,hyperforin,mir-122	1-((2-chlorophenyl)diphenylmethyl)-1H-pyrazole,8-chlorophenylthio-adenosine 3',5'-cyclic monophosphate,capecitabine,cyclosporin A,Insulin,POU2F1,rosiglitazone			warfarin
death receptor	group		3			-0.391	8.74e-10	0.0377	AHR,AKT1,ATF2,CASP3,CASP8,CASP9,caspase,CEBPA,CFLAR,CSF2,cytokine,death receptor,DICER1,HIF1A,HNF4A,IKBKB,IL18,IL6,IRF4,JUN,MAPK1,NFkB (complex),NFKB1,NFKBIA,NOS2,PARP1,PPARG,PTEN,RB1,REL,SP1,STAT4,TNFRSF10A,TNFRSF10B,TNFRSF25,TP53	ACOT1,ACTB,APOE,ATP5F1C,ATP5PO,CNN3,COX6B1,CYCS,DNAJB1,ERP29,FABP3,FABP5,FKBP4,GLRX,GSK3A,HINT1,HNRNPA2B1,HNRNPH1,HNRNPM,HSPD1,HUWE1,ILK,KHSRP,MAPRE2,MINPP1,MMP25,MMRN1,MPDU1,NAP1L4,NUCKS1,OLR1,PGP,PLEK,PLIN3,PPIA,PPIB,PRKAR2B,PSMA2,PSMD2,PXN,RAB43,RAB8A,RBM3,RELA,RPL7,S100A9,SEC23A,SET,SF1,SLC16A3,SYNCRIP,TAGLN2,THBS1,TMOD3,UBE2I,UQCRC1,USO1,VWF,WIPF1	59 (36)	29	bortezomib,TNFSF10	UBR5
TFDP1	transcription regulator		2			0.164	8.75e-10	0.0046	E2F1,E2F3,ERK1/2,TFDP1,TP53	AHCY,APOE,ATP1A1,ATP5F1C,B2M,CD9,CNN3,DBI,EIF3I,FABP5,FKBP4,FUBP1,GSK3A,HSP90B1,HSPA5,HSPD1,HSPE1,ILK,ITGA2B,LASP1,LTB4R,MAPRE2,MT-CO2,NAP1L4,NUCKS1,NUDC,P4HB,PDIA6,PSMD2,RAB8A,RBM3,RELA,RPL7,TAGLN2,UQCRC1,USO1,ZYX	37 (5)	4	SERTAD1,TRIM28	docetaxel,GnRH analog		CCNE1,E2F3,PTTG1,thymidine kinase
IL10R	group		3			0.762	9.51e-10	0.0311	AR,CD247,CD28,CD3,CEBPA,Creb,CREB1,CTNNB1,FOS,IKBKB,IL10R,IL10RA,IRS2,JAK1,KRAS,MAPK1,mir-21,MKNK1,MTOR,MYC,NFKB1,NFKBIA,Notch,P38 MAPK,PDK1,PKM,PTEN,REL,RELA,SP1,STAT3,STAT4,STAT5B,SYK,TCR,TP63,ZAP70	ACOT1,AHCY,ATP5F1C,ATP5PO,ATP6AP1,AVIL,CCT3,CD55,CD9,CDC42,CNN3,CYCS,DBI,ERP29,FABP5,FKBP2,FKBP4,GLRX,GLRX5,GSK3A,HINT1,HNRNPD,HNRNPH1,HSPE1,HUWE1,ILK,KHSRP,LTB4R,MINPP1,MMP25,MMRN1,MPDU1,MT-CO2,NUCKS1,NUDT21,OLR1,PDE4D,PGLS,PGP,PLIN3,PPIA,PPIB,PSMA2,PSMC6,RAB43,RBM3,RBMX,RCSD1,SEC23A,SEPTIN2,SLC16A3,SLC44A2,STK4,SYNCRIP,SYTL1,TAGLN2,THBS1,TUBB1,UQCRC1,USO1,VPS4B,WIPF1	62 (37)	35					CD28
nandrolone decanoate	chemical drug		3			-0.911	9.64e-10	0.0445	Akt,AKT1,AR,CCNE1,Creb,CREB1,EGFR,ERBB2,ESR1,HIF1A,MAPK1,MAPK7,nandrolone decanoate,NCOA2,NR4A1,P38 MAPK,Pka,Pkc(s),RELA,Sod,SREBF2,STUB1,TP53	ACOT1,ACTB,AHCY,ALDOC,ATP5F1C,ATP5PO,ATP6AP1,CCT3,CCT5,CD55,CD9,CNN3,COX6B1,DNM3,DSC1,ERP29,FABP5,FKBP4,FUBP1,GNB1,GSK3A,GSTO1,HNRNPA2B1,HNRNPH1,HNRNPM,HSPA5,HSPE1,HUWE1,LASP1,LTB4R,MAPRE2,MIF,MPPE1,MT-CO2,NAP1L4,NUCKS1,NUDC,P4HB,PABPC1,PCYT1A,PDE4D,PDIA6,PGLS,PLIN3,PPIA,PRKAR2B,PSMD2,RAB5B,RAB8A,RBM3,RBMX,RPL7,SAMD9,SLC44A2,SYTL1,THBS1,TMOD3,USO1,WIPF1	59 (23)	21
Mg2+	chemical - endogenous mammalian		2	Inhibited		-2.16	9.99e-10	0.0136	CASR,CYP19A1,DPYSL2,EGFR,ERK1/2,MAPK1,Mg2+,NME1,PNPLA8,TP53	ACTB,AHCY,APOE,ATP1A1,ATP5F1C,B2M,CCT5,CNN3,DBI,ERP29,FABP5,FKBP4,FUBP1,GSK3A,HNRNPA2B1,HNRNPD,HSP90B1,HSPD1,HSPE1,ILK,LASP1,LTB4R,MAPRE2,NAP1L4,NUDC,P4HB,PABPC1,PDIA6,PPIA,PSMD2,PXN,RAB8A,RBM3,RELA,RPL7,S100A9,TAGLN2,UBE2I,UQCRC1,USO1,WIPF1,ZYX	42 (10)	9				APEX1,EGFR,TP53	DPYSL2
1D-chiro-inositol	chemical - endogenous mammalian		3	Inhibited		-3.204	1.03e-09	0.0357	1D-chiro-inositol,ADRB2,Akt,AKT1,CDKN1A,CDKN1B,CEBPB,CHUK,CREB1,EGFR,ESR1,ESR2,EZH2,FOXC1,GATA1,HIF1A,HMGA1,HSF1,INSR,Insulin,IRF3,IRS1,JAK2,MAP3K8,MAPK1,MASTL,MTOR,NFE2L2,NFKB1,NFKBIA,NRF1,POU5F1,PTEN,RELA,Smad2/3,SP1,SREBF1,STAT3,STAT5B,STK11,TP53,TP73,TSC2,YAP1	ACOT1,AHCY,ALDOC,ATP1A1,ATP5PO,CBFB,CCT5,CD9,CDC42,CTSZ,CYCS,DNAJB1,DPP7,DSC1,ERP29,FKBP2,FKBP4,FUBP1,GNB1,GSTO1,HINT1,HNRNPH1,HNRNPM,HSPD1,HUWE1,KHSRP,MAPRE2,MMP25,MMRN1,MPDU1,MPPE1,MYL12A,NAP1L4,NUCKS1,NUDC,NUDT21,OLR1,PGLS,PGP,PLEK,PPIA,PSMC6,PSMD2,PSMD6,RAB11FIP1,RAB1B,RAB43,RAB5B,RAB8A,RBM3,RBMX,RCSD1,RELA,RNASEL,RPL7,S100A9,SAMD9,SEC23A,SEPTIN2,SET,SLC44A2,STK4,SYNCRIP,SYNE2,SYTL1,THBS1,TMO…	71 (44)	42					reactive oxygen species
Cop9 Signalosome	complex		2			-0.164	1.05e-09	0.0047	Cop9 Signalosome,COPS5,JUN,TP53	AHCY,APOE,APRT,ATP1A1,ATP5F1C,CNN3,CYCS,DBI,FABP5,FCER1G,FKBP4,FUBP1,GSK3A,HNRNPA2B1,HNRNPD,HSPA5,HSPD1,ILK,ITGA2B,LASP1,LTB4R,MAPRE2,MT-CO2,NAP1L4,P4HB,PDIA6,PSMD2,RAB8A,RBM3,RELA,RPL7,SYNCRIP,TAGLN2,TNPO2,UQCRC1,USO1,ZYX	37 (4)	3		curcumin		JUN,TP53
RORC	ligand-dependent nuclear receptor		2			-0.973	1.05e-09	0.0063	HIF1A,RORC,STAT5a/b,TP53	AHCY,ALDOC,ATP1A1,ATP5F1C,ATP5PO,CNN3,DBI,FABP5,FKBP4,FUBP1,GSK3A,HSPD1,HUWE1,ILK,LASP1,LTB4R,MAPRE2,MIF,MT-CO2,NAP1L4,NUCKS1,P4HB,PDIA6,PPIA,PRKAR2B,PSMD2,RAB8A,RBM3,RELA,RPL7,SLC16A3,TAGLN2,THBS1,TUBB1,UQCRC1,USO1,VWF,ZYX	38 (4)	3	BACH2,BATF,CD3,FYN,IL23,MTOR,MTORC1,RICTOR,Stat3-Stat3	3-hydroxyanthranilic acid,7-ketocholesterol,7alpha-hydroxycholesterol,7beta-hydroxycholesterol,cyclosporin A,IL13,simvastatin,TNFSF10,ursolic acid		D-glucose,RPS6KB1,TP53	HK2,IDH2,PKM,SLC7A5,TCR
GSTK1	enzyme		3			0.566	1.05e-09	0.0475	AHR,Akt,AKT1,ARNT,ATF2,EIF4EBP1,GSTK1,HDAC3,IFNA2,IFNB1,IRF3,MAPK8,MTOR,NFkB (complex),NR3C1,P38 MAPK,PEBP1,REL,RELA,SMAD3,STAT5a/b,TBK1,TP53	ACTB,AHCY,ALDOC,ATP1A1,ATP5F1C,AVIL,B2M,CD55,CNN3,DBI,DNAJB1,FKBP4,FUBP1,GSK3A,HNRNPM,HSP90B1,HSPD1,LASP1,LTB4R,MAPRE2,MIF,MINPP1,MPPE1,MT-CO2,NAP1L4,OLR1,P4HB,PDIA6,PGP,PPIB,PRKAR2B,PSMD2,PXN,RAB8A,RBM3,RELA,RNASEL,RPL7,S100A9,SAMD9,SH3KBP1,SLC16A3,STK4,SYTL1,TAGLN2,TUBB1,UQCRC1,USO1,VWF,ZYX	50 (23)	22	KLF3,methylprednisolone				2'3'-cyclic guanosine monophosphate-adenosine monophosphate,TBK1
BMPR (family)	group		3	Inhibited		-2.16	1.07e-09	0.0162	Akt,BMP7,BMPR (family),BMPR1A,BMPR1B,BMPR2,EGFR,P38 MAPK,PPARG,R-Smad,Smad,SMAD1,SMAD1/5/9,Smad2/3,SMAD3,SMAD4,TP53	ACTB,AHCY,ATP1A1,ATP5F1C,ATP5PO,CBFB,CCT5,CD55,CNN3,CYCS,DBI,FABP3,FABP5,FKBP4,FUBP1,GSK3A,HNRNPA2B1,HNRNPD,HNRNPH1,HSPD1,HSPE1,ITGA2B,LASP1,LTB4R,MAPRE2,MIF,MPPE1,NAP1L4,NUDC,P4HB,PABPC1,PDIA6,PLIN3,PPIA,PSMD2,RAB8A,RBM3,RPL7,TAGLN2,UQCRC1,USO1,ZYX	42 (17)	9		bortezomib
diazooxonorleucine	chemical - endogenous non-mammalian		3			-0.566	1.08e-09	0.0489	26s Proteasome,ACACA,AR,ATF4,BIRC5,CDKN1B,CDKN2D,diazooxonorleucine,EIF4EBP1,ERK,FLCN,FOXO1,GPX4,HRAS,MAPK1,MAPK7,MLXIPL,NFE2L2,NFKB1,NFKB2,NFKBIA,NR1I2,P38 MAPK,PI3K (complex),PNPLA2,PPARG,PRKAA1,PRKN,RELA,SOD2,STAT3,TSC2,YAP1	AHCY,ALDOC,ATP1A1,ATP5PO,ATP6AP1,CD55,CNN3,COX6B1,CTSZ,DPP7,ERP29,ERP44,FABP3,FABP5,FCER1G,FKBP4,FUBP1,GNB1,HNRNPA2B1,HSPA5,HSPD1,ITGA2B,KHSRP,LASP1,MIF,MMP25,MPDU1,NAPA,OLR1,PCYT1A,PEBP1,PLIN3,PPIB,PRKAR2B,PSMD2,PSMD6,PXN,RELA,RPL7,S100A9,SEC23A,SH3KBP1,STK4,SYTL1,THBS1,TUBB1,USO1,VWF,WIPF1,ZYX	50 (33)	32					SREBF1
phenylmethylsulfonyl fluoride	chemical - protease inhibitor		3	Activated		2.5	1.08e-09	0.0278	Akt,ARHGEF2,ATF1,C5,CCN2,CD247,CDKN1A,Creb,CTSG,DPP4,EGFR,elastase,FAP,FASN,FOS,HABP2,IL6,IRF3,JAK2,JUN,JUNB,KLK3,KLKB1,MAP3K7,MTOR,MYC,NFKBIA,PARP1,phenylmethylsulfonyl fluoride,PI3K (complex),Pka,PP1 protein complex group,PTEN,RELA,Smad2/3,SMAD3,SRC (family),SRF,TAZ,Tgf beta,TGFB1,TNF,TP53,ZAP70	ALDOC,ATP1A1,ATP5F1C,AVIL,CBFB,CCT3,CCT5,CDC42,CORO1C,COX6B1,CYCS,EIF4H,FKBP2,FKBP4,FUBP1,GLRX,GLRX5,GSK3A,GSTO1,HNRNPC,HNRNPD,HNRNPH1,HSPE1,LASP1,MAPRE2,MIF,MMP25,MPDU1,MPPE1,MYL12A,NAP1L4,NUDC,NUDT21,P4HB,PABPC1,PDE4D,PDIA6,PGP,PLEK,PLIN3,PPIB,PRKAR2B,PSMD2,PSMD6,RAB43,RAB8A,RBM3,RELA,RNASEL,RPL7,SAMD9,SEC23A,SET,SF1,SH3KBP1,SRI,STK4,SYNCRIP,TES,TMOD3,UQCRC1,USO1,VPS4B,ZYX	64 (44)	34				C5AR1	EGFR,elastase,KLK3
policosanol	chemical drug		3			1.236	1.08e-09	0.0495	26s Proteasome,Akt,AKT1,BAK1,ERK,ERN1,HIF1A,HMGCR,HSF1,MTOR,MYC,NR3C1,policosanol,PPARGC1A,PRKAA,SIRT1,SREBF1,STIM1,TBC1D1,TP53,TSC1,TSC2,YAP1	ACTB,AHCY,ALDOC,APOE,ATP1A1,ATP5F1C,ATP5PO,AVIL,CCT3,CCT5,CD9,CNN3,COX6B1,DNAJB1,DPP7,FCER1G,GLRX,GLRX5,GSK3A,GSTO1,HNRNPD,HNRNPH1,HNRNPM,HSPE1,HUWE1,ILK,ITGA2B,LASP1,LTB4R,MAPRE2,MIF,MMP25,MPPE1,NAP1L4,NUCKS1,NUDT21,OLR1,PCYT1A,PDIA6,PGP,PLIN3,PPIA,PPIB,PSMD6,RAB8A,RBM3,RELA,S100A9,SLC16A3,TAGLN2,TBCB,TES,USO1	53 (23)	21
CHEK1	kinase		2	Inhibited		-2.236	1.11e-09	0.0175	CDKN1A,CHEK1,cytarabine,E2F1,E2F3,EGFR,MDM4,P38 MAPK,RASSF1,RB1,RELA,STAT3,TP53	AHCY,APOE,ATP5F1C,CCT5,CD55,CNN3,COX6B1,DBI,EIF3I,FABP5,FCER1G,FKBP4,FUBP1,GSK3A,GSTO1,HNRNPA2B1,HNRNPD,HNRNPH1,HSP90B1,HSPD1,ITGA2B,LASP1,LTB4R,MAPRE2,MIF,NAP1L4,NUCKS1,P4HB,PABPC1,PDIA6,PPIA,PXN,RAB8A,RBM3,RELA,RPL7,SH3KBP1,STK4,SYTL1,TAGLN2,TUBB1,UQCRC1,USO1,WIPF1,ZYX	45 (13)	12	10-(6'-ubiquinonyl)decyltriphenylphosphonium,4-hydroxynonenal,ATM/ATR,bortezomib,CELF2,DNA-PK,DONSON,ESR1,KAT2A,MCRS1,metribolone,NABP1,PTPN11,RABL6,radgocitabine,SSRP1,temozolomide,tirapazamine,TOPBP1,vanadate,WRN,ZEB1	caffeine,CDK5RAP3,CHEK,geldanamycin,GMNN,HUWE1,N-acetyl-L-cysteine,NMS-873,PPM1D,PTTG1,UXT		BUB1,BUB1B,EGFR,ING1	CCNB1,CHEK2,E2F3,LATS2
ADORA1	G-protein coupled receptor		3	Inhibited		-2.54	1.14e-09	0.0199	ADORA1,ADORA2A,ADORA2B,Akt,BDNF,CASP1,Cdc42,CTNNB1,cyclic AMP,DRD1,EGFR,ERBB2,FOS,GNAI1,HIF1A,HRAS,IL18,JAK2,KLF11,KRAS,NFKB1,NFKBIA,PARP1,Pka,PLC,PLCB3,PTEN,RELA,RGS2,RHOA,SP1,STAT5a/b,STAT5B,STAT6,TP53,WBP2,YAP1	ACOT1,ACTB,AHCY,ALDOC,ATP5F1C,ATP5PO,ATP6AP1,CCT5,CNN3,CORO1C,CTSZ,FABP3,FKBP4,FUBP1,GNB1,GSK3A,HINT1,HNRNPA2B1,HNRNPD,HNRNPH1,HNRNPH3,HSP90B1,HSPA5,HSPD1,HSPE1,HUWE1,ILK,KHSRP,LTB4R,MAPRE2,MMP25,MMRN1,MPDU1,MPPE1,MT-CO2,NAP1L4,NAPA,NUCKS1,NUDC,P4HB,PABPC1,PCYT1A,PDE4D,PPIA,PPIB,PSMA2,PSMC6,PSMD2,RAB43,RAB8A,RELA,RPL7,SEC23A,SEPTIN2,SET,SYNCRIP,SYTL1,TES,THBS1,TMOD3,TUBB1,USO1	62 (37)	30	ESR1,hydroxylamine,N6-cyclopentyladenosine,NFKB1	aminophylline,caffeine,clofarabine,DNMT3A,DNMT3B,dyphylline,theophylline		EGFR	ADORA2A,IL4
ADCYAP1	other		2			-0.729	1.14e-09	0.0256	ADAM10,ADCYAP1,Akt,AKT1,CASP8,CDK2,CHUK,Creb,CREB1,cyclic AMP,DIO2,EGFR,ERK1/2,JAK2,MAPK1,MAPK7,NFkB (complex),NFKBIA,NOS2,P38 MAPK,PI3K (complex),Pka,PRL,RELA,STAT1,STAT3	ACTB,ALDOC,APOE,ATP1A1,B2M,CCT5,CD55,CD9,CDC42,CNN3,CTSZ,CYCS,ERP29,FABP5,HNRNPA2B1,HNRNPD,HNRNPH1,HNRNPM,HSPA5,HSPD1,HSPE1,LASP1,MIF,MPDU1,MPPE1,NUDC,P4HB,PABPC1,PCYT1A,PDE4D,PLIN3,PPIA,PRKAR2B,PXN,RBM3,RBMX,S100A9,SAMD9,SET,SH3KBP1,SLC16A3,STK4,SYTL1,TAGLN2,UBE2I,VWF,ZYX	47 (26)	26	FSH			CEBPD,CGA,D-glucose,EGFR,GRK5,Na+,NQO1,PRL,RNF34,TMSB10/TMSB4X,TSC22D1,TXNRD1	ARHGEF25,cholesterol,DNMT3A,IDH2,PTPRR,reactive oxygen species,SERPINE2,TBP,TRH
tyrphostin AG957	chemical drug		3			1.361	1.16e-09	0.0371	Akt,BCR-ABL1,Cdc42,ECT2,GLI1,HRAS,JAK2,MYC,PLCG1,PRKCI,RELA,RHOA,SOX2,STAT3,STAT5a/b,STAT6,TP53,tyrphostin AG957	ACTB,AHCY,ALDOC,ATP1A1,ATP5F1C,CCT3,CD9,CDC42,CNN3,COX6B1,CTSZ,ERP29,FKBP4,FUBP1,GLRX5,GNB1,GSK3A,HNRNPD,HNRNPH1,HNRNPH3,HSP90B1,HSPD1,HSPE1,HUWE1,ILK,ITGA2B,LASP1,LTB4R,MAPRE2,MIF,MPPE1,NAP1L4,P4HB,PCYT1A,PDIA6,PPIA,PSMD2,RAB8A,RAB8B,RBM3,RELA,RNASEL,SEPTIN2,SET,SH3KBP1,STK4,SYTL1,TAGLN2,TUBB1,UBE2I,UQCRC1,USO1,VWF,ZYX	54 (18)	16					BCR-ABL1
alisertib	chemical drug		3			0	1.22e-09	0.0159	AKT1,alisertib,AURKA,BIRC5,BRCA1,ERK1/2,FOXO1,FOXO4,MYC,NFKBIA,NPM1,PAX3-FOXO1,RASSF1,SDCBP	ACTB,AHCY,APOE,ATP1A1,B2M,CCT3,CCT5,CDC42,CORO1C,COX6B1,CTSZ,CYCS,DBI,FABP5,GLRX5,HNRNPA2B1,HNRNPD,HNRNPH1,HNRNPM,HSP90B1,HSPA5,HSPD1,HSPE1,ILK,MIF,MPDU1,NONO,OLR1,P4HB,PEBP1,PPIA,RPL7,SLC16A3,SRI,TAGLN2,TES,THBS1,TUBB1,UBE2I,VWF	40 (14)	12					AURKA,HK2,PAX3-FOXO1
MPO	enzyme	1.625	3	Inhibited		-2.889	1.23e-09	0.0207	26s Proteasome,AKT1,APP,CD247,CXCL12,doxorubicin,E2F1,EGFR,EIF4E,F5,HIPK2,IGF1,IKBKB,MAPK1,MMP2,MMP3,MMP9,MPO,MTOR,NFKB1,NFKBIA,NOS3,PLG,PRKAA2,PRKG1,PRKN,RELA,SERPINE1,SP1,TGFB1,TNF,TSC2,VEGFA,YAP1,ZAP70	AVIL,CBFB,CCT5,CNN3,CORO1C,COX6B1,CTSZ,DBI,DPP7,EIF3I,EIF4H,ERP29,FKBP2,FUBP1,HINT1,HNRNPA2B1,HNRNPC,HNRNPH1,HNRNPM,HSPA5,HSPE1,KHSRP,MIF,MMP25,MMRN1,MPDU1,MYL12A,NUDC,NUDT21,P4HB,PABPC1,PCYT1A,PDE4D,PEBP1,PGP,PLEK,PPIA,PPIB,PRKAR2B,PSMA2,PSMD2,PSMD6,RNASEL,SAMD9,SEC23A,SEPTIN7,SET,SH3KBP1,SRI,STK4,SYNCRIP,SYTL1,TES,THBS1,TMOD3,USO1,VPS4B,ZYX	58 (35)	31	BTK,IFI16,LCN2,PKM,PTPN11,TNFSF12,ursolic acid	andrographolide,APOA1,capsaicin,celecoxib,curcumin,glycyrrhizic acid,heparin,Immunoglobulin,methylprednisolone,N-acetyl-L-cysteine,pantoprazole,PRKG1,rosiglitazone,simvastatin,theophylline,Y 27632		cholesterol,D-glucose
BCR-ABL1	fusion gene/product		2			-0.687	1.27e-09	0.0429	Akt,BCR-ABL1,Cdc42,GLI1,HRAS,JAK2,MYC,PLCG1,RHOA,STAT3,STAT5a/b,STAT6,TP53	ACTB,AHCY,ALDOC,ATP1A1,ATP5F1C,CCT3,CD9,CNN3,COX6B1,CTSZ,CYCS,ERP29,FKBP4,FUBP1,GLRX5,GNB1,GSK3A,HNRNPD,HNRNPH1,HNRNPH3,HSPD1,HSPE1,HUWE1,ILK,ITGA2B,LASP1,LTB4R,MAPRE2,MIF,MPPE1,NAP1L4,NUDT21,OLR1,P4HB,PCYT1A,PDIA6,PPIA,PSMD2,RAB8A,RAB8B,RBM3,RELA,RNASEL,SET,SLC16A3,TAGLN2,TUBB1,UBE2I,UQCRC1,USO1,VWF,WIPF1,ZYX	53 (13)	13	Z-LLL-CHO	arsenic trioxide,bortezomib,dasatinib,docetaxel,ESR1,tanespimycin,tyrphostin AG957,vorinostat		AURKA,BIRC5,BLM,BTK,FYN,HIF1A,HK2,ID1,ITGA2B,L-methionine,LCN2,PKM,PLCG1,reactive oxygen species,RHOA	CXCR4,TNFSF10,TP53
Iti	complex		3	Activated		2.897	1.29e-09	0.0247	ADAM10,ADAM12,AKT1,AMBP,Complement,ERK,FURIN,Iti,JUN,MAP2K1,MAPK1,MAPK8,MMP11,Notch,P38 MAPK,PLAU,RELA,SMAD3,TGFB1,trypsin	CBFB,CCT5,CD55,CD9,CNN3,CORO1C,CYCS,EIF4H,ERP29,FABP5,FCER1G,FKBP2,FUBP1,HINT1,HNRNPA2B1,HNRNPC,HNRNPH1,HNRNPM,HSP90B1,HSPD1,HSPE1,ILK,ITGA2B,LASP1,LTB4R,MIF,MYL12A,PDE4D,PXN,RBM3,RELA,S100A9,SH3KBP1,SLC16A3,SRI,STK4,SYTL1,TMOD3,UBE2I,USO1,VWF,WIPF1,ZYX	43 (20)	17	heparin				FURIN
RUNX1-RUNX1T1	fusion gene/product		3			-0.295	1.32e-09	0.0391	CEBPA,GATA1,Jnk,JUN,MAPK8,PPARG,RUNX1,RUNX1-RUNX1T1,SPI1,SREBF1,STAT3,TP53	ACTB,AHCY,ALDOC,ATP1A1,ATP5F1C,ATP5PO,CD9,CNN3,CYCS,DBI,FABP3,FCER1G,FKBP4,FUBP1,GLRX,GSK3A,HNRNPA2B1,HSPA5,HSPD1,ILK,ITGA2B,LASP1,LTB4R,MAPRE2,MIF,MMRN1,MT-CO2,NAP1L4,OLR1,P4HB,PDIA6,PLEK,PLIN3,PSMD2,RAB8A,RBM3,RELA,RPL7,S100A9,TAGLN2,TUBB1,UBE2I,UQCRC1,USO1,WIPF1,ZYX	46 (12)	11				ALOX5,ARG2	miR-9-5p (and other miRNAs w/seed CUUUGGU)
1-docosapentaenoylglycerol	chemical reagent		3	Activated		3.25	1.32e-09	0.0443	1-docosapentaenoylglycerol,5-hydroxytryptamine,AHR,Akt,AKT1,ARNT,CEBPA,CEBPB,CREB1,EGFR,ESR1,FOS,FOXC2,IGF1,KAT5,MAP3K7,MAPK1,MTOR,MYC,NFE2L2,NFkB (complex),P38 MAPK,PPARA,PPARG,PPARGC1A,RELA,Smad2/3,SNAI1,SP1,SRF,STAT3,STAT5a/b,STIM1,SYK,TP53,TP63,TP73	ALDOC,ATP5F1C,ATP5PO,B2M,CBFB,CCT5,CD55,CD9,CDC42,DBI,DNAJB1,DSC1,ERP29,FABP5,GLRX,GLRX5,GNB1,GSK3A,GSTO1,HINT1,HNRNPD,HNRNPH1,HNRNPM,HSP90B1,HSPA5,HSPE1,LASP1,MAPRE2,MIF,MMRN1,MPPE1,NAP1L4,NUDC,NUDT21,OLR1,P4HB,PABPC1,PCYT1A,PEBP1,PGLS,PGP,PLEK,PPIA,PPIB,PRKAR2B,PSMA2,PSMD2,PSMD6,PXN,RAB5B,RAB8A,RBM3,RBMX,RCSD1,RNASEL,RPL7,SAMD9,SH3KBP1,SLC44A2,STK4,SYNE2,SYTL1,TES,THBS1,TMOD3,TUBB1,UBE2I,VWF,WD…	69 (37)	36
1-eicosapentaenoylglycerol	chemical reagent		3	Activated		3.25	1.32e-09	0.0443	1-eicosapentaenoylglycerol,5-hydroxytryptamine,AHR,Akt,AKT1,ARNT,CEBPA,CEBPB,CREB1,EGFR,ESR1,FOS,FOXC2,IGF1,KAT5,MAP3K7,MAPK1,MTOR,MYC,NFE2L2,NFkB (complex),P38 MAPK,PPARA,PPARG,PPARGC1A,RELA,Smad2/3,SNAI1,SP1,SRF,STAT3,STAT5a/b,STIM1,SYK,TP53,TP63,TP73	ALDOC,ATP5F1C,ATP5PO,B2M,CBFB,CCT5,CD55,CD9,CDC42,DBI,DNAJB1,DSC1,ERP29,FABP5,GLRX,GLRX5,GNB1,GSK3A,GSTO1,HINT1,HNRNPD,HNRNPH1,HNRNPM,HSP90B1,HSPA5,HSPE1,LASP1,MAPRE2,MIF,MMRN1,MPPE1,NAP1L4,NUDC,NUDT21,OLR1,P4HB,PABPC1,PCYT1A,PEBP1,PGLS,PGP,PLEK,PPIA,PPIB,PRKAR2B,PSMA2,PSMD2,PSMD6,PXN,RAB5B,RAB8A,RBM3,RBMX,RCSD1,RNASEL,RPL7,SAMD9,SH3KBP1,SLC44A2,STK4,SYNE2,SYTL1,TES,THBS1,TMOD3,TUBB1,UBE2I,VWF,WD…	69 (37)	36
Arp2/3	complex		3	Activated		3.25	1.32e-09	0.0438	5-hydroxytryptamine,AHR,Akt,AKT1,ARNT,Arp2/3,CEBPA,CEBPB,CREB1,EGFR,ESR1,FOS,FOXC2,IGF1,KAT5,MAP3K7,MAPK1,MTOR,MYC,NFE2L2,NFkB (complex),P38 MAPK,PPARA,PPARG,PPARGC1A,RELA,Smad2/3,SNAI1,SP1,SRF,STAT3,STAT5a/b,STIM1,SYK,TP53,TP63,TP73	ALDOC,ATP5F1C,ATP5PO,B2M,CBFB,CCT5,CD55,CD9,CDC42,DBI,DNAJB1,DSC1,ERP29,FABP5,GLRX,GLRX5,GNB1,GSK3A,GSTO1,HINT1,HNRNPD,HNRNPH1,HNRNPM,HSP90B1,HSPA5,HSPE1,LASP1,MAPRE2,MIF,MMRN1,MPPE1,NAP1L4,NUDC,NUDT21,OLR1,P4HB,PABPC1,PCYT1A,PEBP1,PGLS,PGP,PLEK,PPIA,PPIB,PRKAR2B,PSMA2,PSMD2,PSMD6,PXN,RAB5B,RAB8A,RBM3,RBMX,RCSD1,RNASEL,RPL7,SAMD9,SH3KBP1,SLC44A2,STK4,SYNE2,SYTL1,TES,THBS1,TMOD3,TUBB1,UBE2I,VWF,WD…	69 (37)	36	FYN
VCP	enzyme	-1.364	2			-1.206	1.36e-09	0.0246	MYC,NFkB (complex),NFKB2,P38 MAPK,TP53,VCP	ACTB,APOE,ATP1A1,ATP5F1C,CCT3,CD55,CNN3,COX6B1,CYCS,DBI,FABP5,FKBP4,FUBP1,GLRX5,GSK3A,HNRNPA2B1,HNRNPD,HNRNPH1,HSPA5,HSPE1,ILK,ITGA2B,LASP1,LTB4R,MAPRE2,MT-CO2,NAP1L4,NUDT21,OLR1,P4HB,PDIA6,PPIA,PSMD2,PXN,RAB8A,RBM3,RELA,RPL7,SLC16A3,TES,UBE2I,UQCRC1,USO1,ZYX	44 (6)	6	1,2-dithiol-3-thione,ATR,DNA-PK	CB-5083,GABA,GnRH analog,NMS-873,PAX3-FOXO1		TP53
DYRK2	kinase		2			-0.169	1.39e-09	0.0036	26s Proteasome,DYRK2,SNAI1,TP53	AHCY,APOE,ATP1A1,ATP5F1C,CD55,CNN3,DBI,FABP5,FKBP4,FUBP1,GSK3A,HSPA5,HSPD1,ILK,ITGA2B,LASP1,LTB4R,MAPRE2,MT-CO2,NAP1L4,P4HB,PDIA6,PEBP1,PSMD2,PSMD6,RAB8A,RBM3,RELA,RPL7,TAGLN2,THBS1,UBE2I,UQCRC1,USO1,ZYX	35 (4)	3	ESR1	FN1		DPYSL3,TP53
XRCC6	enzyme		2			-1.151	1.42e-09	0.0066	IRF3,RELA,TP53,XRCC6	AHCY,APOE,ATP1A1,ATP5F1C,B2M,CNN3,DBI,FABP5,FKBP4,FUBP1,GSK3A,HSP90B1,HSPA5,HSPD1,ILK,ITGA2B,LASP1,LTB4R,MAPRE2,MT-CO2,NAP1L4,OLR1,P4HB,PSMD2,PXN,RAB8A,RBM3,RELA,RPL7,SH3KBP1,STK4,SYTL1,TAGLN2,THBS1,UQCRC1,USO1,ZYX	37 (4)	3	DNA-PK,IL4	5-azacytidine,CD28,CD3,PAX3-FOXO1,PTTG1		Immunoglobulin,WRN	TP53
APOC3	transporter		3	Inhibited		-2.287	1.42e-09	0.0479	Akt,AKT1,APOC3,Ca2+,CDKN1A,CEBPB,CHUK,Creb,CREB1,CTNNB1,EGFR,ESR1,ESR2,FOXC1,GATA1,HIF1A,HSF1,IRF3,JAK2,KLF11,L-type Calcium Channel,LPL,MAP3K8,MAPK1,MASTL,MTOR,MTTP,NFAT5,NFE2L2,NFKB1,NFKBIA,NRF1,PDX1,Pkc(s),POU5F1,PPARGC1A,PRKCA,PTEN,RELA,Smad2/3,SP1,SREBF1,STAT3,STK11,TP53,TP73,TSC2,YAP1	AHCY,ALDOC,APOE,CBFB,CCT5,CD55,CD9,CDC42,CTSZ,DNAJB1,DPP7,DSC1,ERP29,FABP3,FKBP4,FUBP1,GNB1,GSTO1,HINT1,HNRNPH1,HNRNPM,HSPA5,HSPD1,HUWE1,ILK,KHSRP,MAPRE2,MMP25,MPDU1,MPPE1,MT-CO2,MYL12A,NAP1L4,NUCKS1,NUDC,NUDT21,P4HB,PEBP1,PGLS,PGP,PLEK,PLIN3,PPIA,PSMC6,PSMD2,PSMD6,RAB11FIP1,RAB43,RAB5B,RAB8A,RBM3,RBMX,RCSD1,RELA,RNASEL,RPL7,SAMD9,SEC23A,SET,SLC44A2,STK4,SYNCRIP,SYNE2,SYTL1,THBS1,TMOD3,USO1,WDR72…	69 (48)	48	CEBPD,D-glucose,SMAD7	Insulin,JUN		cholesterol,HTRA2,LONP1	APOA1
LGR4	transmembrane receptor		3			-0.378	1.42e-09	0.0335	26s Proteasome,AGT,BAK1,Cdc42,CREB1,EGFR,ERBB2,ERN1,FOS,HRAS,HSF1,JAK2,KRAS,LGR4,LRP6,MAPK1,MTOR,NFKBIA,PARP1,PI3K (complex),PRKAA,RELA,Smad2/3,SOX2,SP1,SRC (family),STAT5a/b,STAT5B,STAT6,STIM1,TP53,TSC1,TSC2,WBP2	ACOT1,ACTB,AHCY,ATP1A1,ATP5F1C,AVIL,B2M,CBFB,CCT3,CCT5,CD9,CDC42,CNN3,CORO1C,CTSZ,DPP7,ERP29,GLRX,GNB1,GSK3A,GSTO1,HINT1,HNRNPA2B1,HNRNPD,HNRNPH1,HNRNPH3,HSPA5,HSPE1,LASP1,MAPRE2,MMRN1,MPDU1,MT-CO2,NAP1L4,NUDC,NUDT21,OLR1,PABPC1,PDIA6,PGP,PPIA,PPIB,PSMA2,PSMC6,PSMD6,PXN,RAB8A,RBM3,RBMX,RPL7,SEPTIN2,SET,SH3KBP1,STK4,SYTL1,TAGLN2,TBCB,TES,THBS1,TMOD3,TUBB1,USO1,WIPF1	63 (34)	31	CLDN7,RSPO3	methylprednisolone		AHR,CYP1A2,EGFR,ZEB1	cholesterol
SBI-0206965	chemical drug		3			-1.206	1.43e-09	0.0294	26s Proteasome,ACACA,Akt,AKT1,E2F1,EIF4EBP1,ERK,FLCN,FOXO3,GPX4,HIPK2,HRAS,ITGB3,MAPK1,NFE2L2,NFKB1,NFKB2,NFKBIA,Nos,P38 MAPK,PI3K (complex),PNPLA2,PRKAA1,PRKAA2,PRKAB1,PRKAG1,PRKN,RELA,SBI-0206965,STAT3,YAP1	APOE,ATP1A1,ATP5PO,AVIL,CCT3,CD55,CTSZ,EIF3I,ERP29,ERP44,FABP5,FCER1G,FUBP1,GNB1,HNRNPA2B1,HNRNPM,HSPA5,HSPD1,HSPE1,ILK,ITGA2B,KHSRP,LASP1,MIF,MMP25,MPDU1,MPPE1,NUDC,OLR1,P4HB,PCYT1A,PLIN3,PPIB,PRKAR2B,PSMD2,PSMD6,PXN,SEC23A,SH3KBP1,STK4,SYTL1,USO1,WIPF1,ZYX	44 (31)	27
DNAJB1	transcription regulator	-1.554	2			-0.507	1.46e-09	0.0027	DNAJB1,HSF1,TP53	AHCY,APOE,ATP1A1,ATP5F1C,B2M,CCT3,CCT5,CNN3,DBI,FABP5,FKBP4,FUBP1,GSK3A,HNRNPA2B1,HSPA5,HSPD1,ILK,ITGA2B,LASP1,LTB4R,MAPRE2,MT-CO2,NAP1L4,P4HB,PDIA6,PSMD2,RAB8A,RBM3,RELA,RPL7,TAGLN2,THBS1,UQCRC1,USO1,ZYX	35 (3)	2	bortezomib,curcumin,DNMT3B,geldanamycin,monorden,tanespimycin	AHR,miR-1-3p (and other miRNAs w/seed GGAAUGU),miR-155-3p (miRNAs w/seed UCCUACC)		TP53	reactive oxygen species
vasopressin receptor	group		3	Activated		2.449	1.47e-09	0.0409	AKT1,AVPR2,CCND1,Cdc42,CREB1,CTNNB1,CUL5,EGFR,ERBB2,IGF1R,MAPK1,MAPK8,MYD88,NANOG,NFkB (complex),P38 MAPK,PI3K (complex),PLCG1,PTEN,PTK2,RELA,RHOA,STAT3,STAT5a/b,TP53,TSC2,Ubiquitin,vasopressin receptor,YAP1	ACTB,AHCY,ALDOC,ATP5F1C,CCT5,CD9,CDC42,CNN3,CTSZ,CYCS,DBI,DPP7,ERP29,FKBP4,FUBP1,GSK3A,HNRNPA2B1,HNRNPD,HNRNPH1,HNRNPM,HSPD1,HSPE1,ILK,LTB4R,MAPRE2,MIF,MMP25,NAP1L4,NUDC,OLR1,P4HB,PABPC1,PCYT1A,PDIA6,PLIN3,PPIA,PRKAR2B,PSMD2,RAB43,RAB8A,RBM3,RBMX,RPL7,SEC23A,SH3KBP1,SLC16A3,STK4,SYNCRIP,SYTL1,THBS1,UBE2I,USO1,VWF,ZYX	54 (29)	26
LGR5	transmembrane receptor		3	Activated		3.355	1.5e-09	0.0219	Akt,AKT1,BAK1,BAX,BCL2L11,CTNNB1,EGFR,ERN1,ESR1,IQGAP1,JUN,KAT5,LGR5,LRP6,MAPK1,Smad2/3,SRC (family),STAT1,XBP1,YAP1	ACTB,ATP1A1,ATP5PO,CBFB,CCT5,CDC42,CYCS,DSC1,ERP29,ERP44,FCER1G,FKBP2,GNB1,HNRNPD,HNRNPH1,HNRNPM,HSP90B1,HSPD1,HSPE1,ILK,LTB4R,MMP25,MPPE1,MT-CO2,NUDC,OLR1,P4HB,PABPC1,PCYT1A,PDIA6,PGLS,PLIN3,PPIA,PPIB,PSMD6,RAB5B,SAMD9,SEC23A,SLC16A3,SLC44A2,STK4,TBCB,TMOD3,UBE2I,UQCRC1,USO1,WIPF1	47 (20)	16	JUN,KAT2A,NEUROG1	thapsigargin,TP53,tunicamycin		AHR,CYP1A2	AKR1C3
morin	chemical - endogenous non-mammalian		2			0.617	1.52e-09	0.0178	MAPK1,morin,NFkB (complex),NFKBIA,STAT6,TP53	ACTB,AHCY,APOE,ATP1A1,ATP5F1C,CNN3,CTSZ,DBI,ERP29,FABP5,FCER1G,FKBP4,FUBP1,GSK3A,HNRNPH3,HSPA5,HSPD1,ILK,LASP1,LTB4R,MAPRE2,MPDU1,MT-CO2,NAP1L4,OLR1,P4HB,PDIA6,PSMD2,PXN,RAB8A,RBM3,RELA,RPL7,SLC16A3,TAGLN2,TES,THBS1,UBE2I,UQCRC1,USO1,WIPF1,ZYX	42 (6)	5					BIRC5,TP53
Cyclin A	group		2			-0.302	1.56e-09	0.0268	APC,CEBPB,CTNNB1,Cyclin A,E2F1,E2F3,RB1,SP1,TP53	ACTB,AHCY,APOE,ATP5F1C,ATP5PO,B2M,CD55,CD9,CNN3,COX6B1,DBI,EIF3I,FABP5,FCER1G,FKBP4,FUBP1,GSK3A,HINT1,HNRNPD,HSP90B1,HSPD1,HSPE1,ILK,ITGA2B,LASP1,MAPRE2,NAP1L4,NUCKS1,NUDC,NUDT21,OLR1,P4HB,PCYT1A,PDIA6,PLIN3,PRKAR2B,PSMD2,RAB8A,RBM3,RELA,RPL7,TAGLN2,UQCRC1,USO1	44 (9)	9	APP,bortezomib,CCNE1,CD28,CD3,DCN,F2,FBXO5,HSF1,Insulin,JUN,PTTG1,SMAD7,TSH,XBP1	2-amino-1-methyl-6-phenylimidazo-4-5-b-pyridine,AHR,arsenic trioxide,ascorbic acid,AURKA,CD 437,CDC20,celecoxib,curcumin,docetaxel,farnesol,FN1,NEK8,silibinin,tetraethylammonium,TXNIP,UXT
RNF114	transcription regulator		3			0.781	1.59e-09	0.0171	Akt,ATF2,CD74,EHD1,ERK1/2,IKBKB,JUN,MAP2K3,MAP3K7,MAPK8,NFKB1,P38 MAPK,RELA,RNF114,SYK,TAB1,TNIP1,TP53,ZAP70	ACTB,AHCY,ATP1A1,ATP5F1C,B2M,CD55,CNN3,CYCS,DBI,FCER1G,FKBP4,FUBP1,GSK3A,HNRNPA2B1,HSP90B1,ILK,KHSRP,LASP1,LTB4R,MAPRE2,MIF,MPPE1,NAP1L4,P4HB,PDIA6,PRKAR2B,PSMD2,RAB8A,RBM3,RCSD1,RELA,RNASEL,RPL7,S100A9,SH3KBP1,STK4,TAGLN2,UQCRC1,USO1,VPS4B,ZYX	41 (19)	17					RALGPS1,TAB1
Hdac1/2	group		2			1.151	1.67e-09	0.0067	Hdac1/2,RELA,TP53,TP63	AHCY,APOE,ATP1A1,ATP5F1C,B2M,CDC42,CNN3,DBI,FABP5,FKBP4,FUBP1,GSK3A,HSP90B1,HSPA5,HSPD1,ILK,ITGA2B,KHSRP,LASP1,LTB4R,MAPRE2,MT-CO2,NAP1L4,OLR1,PDIA6,PSMD2,PXN,RAB8A,RBM3,RPL7,SH3KBP1,STK4,SYTL1,TAGLN2,UQCRC1,USO1,ZYX	37 (4)	3					TP53
continuous erythropoietin receptor activator	biologic drug		3	Inhibited		-2.91	1.7e-09	0.0455	Akt,AKT1,CDKN1A,CDKN1B,CEBPB,CHUK,continuous erythropoietin receptor activator,Creb,CTNNB1,EGFR,EPOR,ESR1,ESR2,EZH2,FOXC1,GATA1,HIF1A,HSF1,IRF3,JAK2,KLF11,MAP3K8,MAPK1,MASTL,MTOR,NFAT5,NFE2L2,NFKB1,NFKBIA,NRF1,PDX1,POU5F1,PPARGC1A,PTEN,RELA,Smad2/3,SP1,SREBF1,STAT3,STAT5B,STK11,TP53,TP73,TSC2,YAP1	ACOT1,AHCY,ALDOC,CBFB,CCT5,CD55,CD9,CDC42,CTSZ,DNAJB1,DPP7,DSC1,ERP29,FABP3,FKBP4,FUBP1,GNB1,GSTO1,HINT1,HNRNPH1,HNRNPM,HUWE1,ILK,KHSRP,MAPRE2,MMP25,MMRN1,MPDU1,MPPE1,MT-CO2,MYL12A,NAP1L4,NUCKS1,NUDC,NUDT21,P4HB,PGLS,PGP,PLEK,PLIN3,PPIA,PSMC6,PSMD2,PSMD6,RAB11FIP1,RAB43,RAB5B,RAB8A,RBM3,RCSD1,RELA,RNASEL,RPL7,S100A9,SAMD9,SEC23A,SET,SH3KBP1,SLC44A2,STK4,SYNCRIP,SYNE2,SYTL1,THBS1,TMOD3,USO1,WDR72,…	68 (45)	43
ELOA	transcription regulator		3			0.667	1.73e-09	0.0061	ELOA,ELOC,RELA,RNA polymerase II,TP53,VHL	AHCY,APOE,ATP1A1,ATP5F1C,B2M,CNN3,DBI,FABP5,FKBP4,FUBP1,GSK3A,HNRNPA2B1,ILK,ITGA2B,LASP1,LTB4R,MAPRE2,MT-CO2,NAP1L4,OLR1,P4HB,PDIA6,PSMD2,PXN,RAB8A,RBM3,RELA,RPL7,SH3KBP1,STK4,SYTL1,TAGLN2,THBS1,UQCRC1,USO1,ZYX	36 (6)	3
aminophylline	chemical drug		3	Activated		2.449	1.75e-09	0.0006	ADORA1,ADORA2A,aminophylline,cyclic AMP,EGFR,ERK,Pde,PDE5A	ACTB,ALDOC,ATP6AP1,CCT5,CDC42,CYCS,HNRNPA2B1,HNRNPD,HNRNPH1,HSP90B1,HSPA5,HSPE1,ITGA2B,MT-CO2,NAPA,NUDC,P4HB,PABPC1,PDE4D,PPIA,PRKAR2B,RELA,S100A9,VWF	24 (8)	5					ADORA1
darbepoetin alfa	biologic drug		3	Inhibited		-2.91	1.77e-09	0.0464	Akt,AKT1,CDKN1A,CDKN1B,CEBPB,CHUK,Creb,CTNNB1,darbepoetin alfa,EGFR,EPOR,ESR1,ESR2,EZH2,FOXC1,GATA1,HIF1A,HSF1,IRF3,JAK2,KLF11,MAP3K8,MAPK1,MASTL,MTOR,NFAT5,NFE2L2,NFKB1,NFKBIA,NRF1,PDX1,POU5F1,PPARGC1A,PTEN,RELA,Smad2/3,SP1,SREBF1,STAT3,STAT5B,STK11,TP53,TP73,TSC2,YAP1	ACOT1,AHCY,ALDOC,CBFB,CCT5,CD55,CD9,CDC42,CTSZ,DNAJB1,DPP7,DSC1,ERP29,FABP3,FKBP4,FUBP1,GNB1,GSTO1,HINT1,HNRNPH1,HNRNPM,HUWE1,ILK,KHSRP,MAPRE2,MMP25,MMRN1,MPDU1,MPPE1,MT-CO2,MYL12A,NAP1L4,NUCKS1,NUDC,NUDT21,P4HB,PGLS,PGP,PLEK,PLIN3,PPIA,PSMC6,PSMD2,PSMD6,RAB11FIP1,RAB43,RAB5B,RAB8A,RBM3,RCSD1,RELA,RNASEL,RPL7,S100A9,SAMD9,SEC23A,SET,SH3KBP1,SLC44A2,STK4,SYNCRIP,SYNE2,SYTL1,THBS1,TMOD3,USO1,WDR72,…	68 (45)	43					SELP
Pik3r	group		3			-1.434	1.8e-09	0.0246	26s Proteasome,AHR,AKT1,Ap1,AR,CDKN1A,CEBPA,CEBPB,CREB1,CSF2,CTNNB1,cytokine,EGFR,EIF2AK3,ERN1,ESR1,FOS,HIF1A,HNF4A,IGF1,IKBKB,IL10,IL1B,IL6,IRF3,IRF4,JAK2,KRAS,MAPK8,MYC,NFE2L2,NFkB (complex),NFKB1,PI3K (complex),Pik3r,PIK3R1,PPARG,PTEN,RB1,REL,RELA,SP1,TFCP2,TP53,TSC2	ACOT1,APOE,ATP1A1,ATP5F1C,ATP5PO,ATP6AP1,CCT3,CCT5,CDC42,DNAJB1,DPP7,DSC1,FABP3,FABP5,FUBP1,GLRX,GLRX5,GNB1,GSTO1,HINT1,HNRNPD,HNRNPH1,HNRNPM,HSPA5,HUWE1,ILK,KHSRP,LASP1,MAPRE2,MIF,MINPP1,MMRN1,NAP1L4,NAPA,NUCKS1,NUDC,NUDT21,OLR1,PABPC1,PEBP1,PGLS,PLEK,PPIA,PRKAR2B,PSMA2,PSMC6,PSMD2,PSMD6,PXN,RAB43,RAB5B,RAB8A,RBM3,RBMX,RELA,RNASEL,RPL7,SAMD9,SEC23A,SET,SF1,SLC16A3,STK4,SYNCRIP,SYTL1,TBCB,TES,THB…	70 (45)	42	TGM2				TP53
HAS1	enzyme		3			0.384	1.83e-09	0.027	26s Proteasome,AKT1,AR,BAK1,BAX,BCL6,CTNNB1,DDIT3,EGFR,EIF2AK3,ERBB2,ESR1,FAS,FASLG,HAS1,HIF1A,HSD17B12,HSF1,IFNG,Insulin,MED1,NCOA3,NFKBIA,PAK1,PIK3R1,Pka,PPARG,RB1,RELA,SNAI1,SP1,SRC (family),STAT3,STAT5a/b,STAT5B,TCR,TP53,TSC2,ZAP70	ACOT1,ACTB,AHCY,ALDOC,ATP1A1,ATP5F1C,ATP5PO,ATP6AP1,AVIL,CD9,CDC42,CTSZ,DBI,DNAJB1,DPP7,DSC1,ERP44,FABP3,FKBP2,FUBP1,GNB1,HINT1,HNRNPH1,HNRNPM,HUWE1,ILK,MAPRE2,MIF,MMRN1,MPDU1,MPPE1,NAP1L4,NAPA,NUCKS1,NUDC,PABPC1,PDE4D,PDIA6,PEBP1,PGLS,PLEK,PPIB,PSMA2,PSMD6,RAB5B,RAB8A,RNASEL,SAMD9,SH3KBP1,SLC44A2,STK4,SYNCRIP,TAGLN2,THBS1,TMOD3,TUBB1,USO1,VPS4B,VWF,WDR72,ZYX	61 (39)	36	BHLHE40	rosiglitazone		CCNB1
GIT2	other	-1.491	3			1.26	1.86e-09	0.0143	BCAR1,Cdc42,CTNNB1,ECT2,EGFR,ESR1,GIT2,HIF1A,HRAS,JUN,NFAT5,NFKBIA,NR3C2,PLCG2,PRKCA,RAC1,RELA,RHOA,SRF,STAT3,STAT5B,TCF7L2,TP53	ACOT1,AHCY,ALDOC,ATP5F1C,ATP5PO,CCT5,CD9,CDC42,CHMP1B,CTSZ,CYCS,DBI,DHRS7,DSC1,FABP3,FUBP1,GSK3A,HNRNPD,HNRNPH1,HSPD1,HSPE1,HUWE1,ILK,MAPRE2,MMRN1,MPDU1,NAP1L4,NUCKS1,NUDC,P4HB,PABPC1,PCYT1A,PDIA6,PGLS,PLIN3,PPIA,PPIB,PSMD2,RAB5B,RAB8A,RBM3,RPL7,SAMD9,SH3KBP1,SLC44A2,STK4,SYTL1,TAGLN2,TMOD3,USO1,VWF	51 (23)	20	ESR1	KLF3
Cyp1a	group		3			0.457	1.89e-09	0.0141	2-amino-1-methyl-6-phenylimidazo-4-5-b-pyridine,AR,aristolochic acid I,Cyp1a,CYP1A1,CYP1A2,ellipticine,NFKBIA,RELA,TP53	AHCY,APOE,ATP1A1,ATP5F1C,ATP6AP1,B2M,CCT3,CCT5,COX6B1,CTSZ,CYCS,DBI,FABP5,FUBP1,GSK3A,HSP90B1,HSPE1,ILK,ITGA2B,LASP1,LTB4R,MAPRE2,MPDU1,NAP1L4,OLR1,P4HB,PDIA6,PSMA2,PSMD2,PXN,RAB8A,RBM3,RELA,RPL7,SH3KBP1,STK4,SYTL1,TAGLN2,THBS1,UQCRC1,USO1,WIPF1,ZYX	43 (10)	6	AHR,ethoxyquin
mir-1	microRNA		3			1.581	1.9e-09	0.0142	26s Proteasome,Akt,BAG1,BAX,CASP8,CD24,CD40,HIF1A,HSF1,Hsp70,HSPA5,HSPA9,HSPD1,IGF1R,mir-1,NFKBIA,NR3C1,STAT3,STUB1,TLR2,TLR4	ACTB,ALDOC,ATP5PO,B2M,CCT3,CCT5,CD9,CDC42,CNN3,COX6B1,CYCS,DNAJB1,DNM3,FKBP4,HNRNPA2B1,HSP90B1,HSPE1,HUWE1,LASP1,MCU,MPDU1,MPPE1,NUCKS1,P4HB,PDIA6,PLEK,PPIA,PPIB,PRKAR2B,PSMD2,PSMD6,RPL7,S100A9,SYNE2,TAGLN2,UBE2I,UQCRC1,USO1,VWF,WIPF1	40 (21)	19	MTOR,SGPL1,vorinostat	IL13,Insulin,SREBF1,TNFSF12,TP53,TSH			EDN1,ESR1,FN1,GATAD2A,HSP90B1,TNS3
mannosylated lipoarabinomannan	chemical - endogenous non-mammalian		3			1.361	1.94e-09	0.046	Akt,CASP8,CD247,CD28,CD3,CREB1,CXCL12,EGFR,ERK1/2,ESR1,HRAS,IKBKB,IL15,LAT,LCK,mannosylated lipoarabinomannan,MTOR,NFkB (complex),NFKB2,NFKBIA,NRAS,PAK2,PIK3R1,PLCG1,REL,TCR,TLR2,TLR2/TLR4,TLR4,YAP1,ZAP70	ACTB,ALDOC,ATP1A1,ATP5F1C,AVIL,B2M,CCT5,CDC42,CTSZ,CYCS,DSC1,FABP5,FKBP2,HINT1,HNRNPH1,HSPA5,HSPD1,HSPE1,HUWE1,ILK,LTB4R,MINPP1,MMP25,MMRN1,MPDU1,MPPE1,NUDC,PABPC1,PCYT1A,PDE4D,PGLS,PGP,PLEK,PPIA,PPIB,PXN,RAB5B,RBM3,RBMX,RPL7,S100A9,SAMD9,SEPTIN7,SET,SH3KBP1,SLC44A2,STK4,SYNCRIP,TAGLN2,TMOD3,TUBB1,UQCRC1,VPS4B,VWF	54 (31)	27
CSNK1D	kinase		2			-0.16	2.04e-09	0.0147	APC,CSNK1D,CTNNB1,cytarabine,GJA1,MDM2,NCOA3,PSEN2,TP53	AHCY,APOE,ATP5F1C,ATP5PO,B2M,CD55,CD9,CNN3,CTSZ,DBI,DHRS7,FABP5,FKBP4,GNB1,GSK3A,HSPA5,HSPD1,ILK,ITGA2B,LASP1,LTB4R,MAPRE2,MT-CO2,NAP1L4,P4HB,PDIA6,PLIN3,PSMA2,PSMD2,RAB8A,RBM3,RELA,RPL7,SLC16A3,TAGLN2,THBS1,UQCRC1,USO1,ZYX	39 (9)	8				PSEN2	cytarabine,PRKN
cobalt	chemical toxicant		2			-0.667	2.07e-09	0.0059	cobalt,Hif1,HIF1A,TP53	AHCY,ALDOC,ATP1A1,ATP5F1C,ATP5PO,CNN3,DBI,FABP5,FKBP4,FUBP1,GSK3A,HSPD1,HUWE1,ILK,LASP1,LTB4R,MAPRE2,MIF,MT-CO2,NAP1L4,NUCKS1,P4HB,PDIA6,PPIA,PRKAR2B,PSMD2,RAB8A,RBM3,RELA,RPL7,SLC16A3,TAGLN2,THBS1,UQCRC1,USO1,ZYX	36 (4)	3				HIF1A,PDE3A,TP53	ESR1
dichloroacetic acid	chemical drug		2			-0.164	2.08e-09	0.0066	dichloroacetic acid,Hif1,HIF1A,PDK1,TP53	AHCY,ALDOC,APOE,ATP1A1,ATP5F1C,ATP5PO,CNN3,DBI,FABP5,FKBP4,FUBP1,GSK3A,HSPA5,HSPD1,HUWE1,ILK,ITGA2B,LASP1,LTB4R,MAPRE2,MIF,MT-CO2,NAP1L4,NUCKS1,P4HB,PDIA6,PPIA,PRKAR2B,PSMD2,RAB8A,RBM3,RPL7,SLC16A3,SLC44A2,TAGLN2,USO1,ZYX	37 (5)	4				Immunoglobulin,reactive oxygen species,TP53	HIF1A,IgG,IL5
naringin	chemical - endogenous non-mammalian		2			0	2.09e-09	0.0173	Ap1,ERK,ESR1,naringin,P38 MAPK,TP53	AHCY,APOE,ATP1A1,ATP5F1C,CD55,CDC42,CNN3,DBI,DSC1,FABP5,FKBP4,FUBP1,GNB1,GSK3A,HNRNPD,HSP90B1,HSPD1,ILK,LASP1,MAPRE2,MIF,MT-CO2,NAP1L4,OLR1,P4HB,PDIA6,PGLS,PSMD2,RAB5B,RAB8A,RBM3,RELA,RPL7,SAMD9,SLC16A3,SLC44A2,STK4,TAGLN2,THBS1,TMOD3,UBE2I,UQCRC1,USO1,ZYX	44 (6)	5				ESR1	FURIN,TP53
hexa-D-arginine	biologic drug		3	Activated		2.949	2.1e-09	0.0474	ADAM10,AHR,Akt,AKT1,ARNT,FURIN,hexa-D-arginine,JUN,MMP11,NFkB (complex),NFKBIA,Notch,NR3C1,RELA,STAT5a/b,TGFB1	ALDOC,B2M,CBFB,CCT5,CD9,CNN3,CORO1C,CTSZ,CYCS,DNAJB1,EIF4H,FABP5,FCER1G,FKBP2,FKBP4,FUBP1,HINT1,HNRNPA2B1,HNRNPC,HNRNPH1,HNRNPM,HSP90B1,HSPD1,HSPE1,ILK,ITGA2B,LASP1,LTB4R,MPDU1,MPPE1,MT-CO2,MYL12A,OLR1,PDE4D,PXN,RBM3,RELA,S100A9,SH3KBP1,SLC16A3,SRI,STK4,SYTL1,TMOD3,TUBB1,USO1	46 (16)	14					FURIN
CHCHD4	enzyme		2			0.333	2.16e-09	0.0059	CHCHD4,HIF1A,TP53	AHCY,ALDOC,APOE,ATP1A1,ATP5F1C,ATP5PO,CNN3,DBI,FABP5,FKBP4,FUBP1,GSK3A,HSPA5,HSPD1,HUWE1,ILK,ITGA2B,LASP1,LTB4R,MAPRE2,MIF,MT-CO2,NAP1L4,NUCKS1,P4HB,PDIA6,PPIA,PRKAR2B,PSMD2,RAB8A,RBM3,RPL7,SLC16A3,TAGLN2,USO1,ZYX	36 (3)	3				EIF2A,HIF1A	RPS6KB1,TP53
NDUFA11	enzyme		3			-1.021	2.18e-09	0.0386	Akt,ATF4,Creb,CREB1,EIF2A,FLNA,HIF1A,MTOR,NDUFA11,NFKB1,PPARG,RICTOR,RPS6KB1,TP53	AHCY,ALDOC,ATP1A1,ATP5PO,ATP6AP1,AVIL,CD9,CNN3,COX6B1,CYCS,DBI,FABP3,FCER1G,FKBP4,FUBP1,GSK3A,HSPD1,HUWE1,ILK,KHSRP,LTB4R,MAPRE2,MIF,MPPE1,MT-CO2,NAP1L4,NAPA,NUCKS1,P4HB,PDIA6,PGP,PLIN3,PPIB,PSMA2,PSMC6,PSMD2,PSMD6,PXN,RAB8A,RBM3,RBMX,SH3KBP1,SLC16A3,SYTL1,UQCRC1,USO1,ZYX	47 (14)	11	HBA1/HBA2,STK11,TEAD1	HIF1A,LONP1,RICTOR		EIF2A	reactive oxygen species,RPS6KB1
TBK1	kinase		2			-0.295	2.29e-09	0.0471	Akt,AKT1,ATF2,EIF4EBP1,ERK1/2,IKBKB,IRF3,JUN,MTOR,NFkB (complex),NFKBIA,P38 MAPK,PEBP1,REL,RELA,STAT1,TBK1,TP53	ACTB,AHCY,ATP1A1,ATP5F1C,AVIL,B2M,CD55,CNN3,CTSZ,CYCS,DBI,FCER1G,FKBP4,FUBP1,GSK3A,HNRNPA2B1,HNRNPM,HSPD1,LASP1,LTB4R,MAPRE2,MIF,MINPP1,MPDU1,MPPE1,MT-CO2,NAP1L4,P4HB,PDIA6,PGP,PPIB,PRKAR2B,PSMD2,PXN,RAB8A,RBM3,RELA,RPL7,SH3KBP1,SLC16A3,STK4,SYTL1,TAGLN2,UQCRC1,USO1,ZYX	46 (18)	18	2'3'-cyclic guanosine monophosphate-adenosine monophosphate,2prime-3prime RR-S2 cyclic di-AMP,metribolone,NACC1,USP27X	9-nitrooleic acid,CXA-10,GSTK1,KDM4A,nitro-conjugated linoleic acid,PPM1B,PTPN11		EDN1,IgG,JUN,MTOR,NFKB1,RPS6KB1,TSC22D1,ZBP1	TP53
plicamycin	chemical drug		2			0	2.38e-09	0.0041	plicamycin,TP53	AHCY,APOE,ATP1A1,ATP5F1C,CNN3,DBI,FABP5,FKBP4,FUBP1,GSK3A,HSPA5,HSPD1,ILK,ITGA2B,LASP1,LTB4R,MAPRE2,MIF,MT-CO2,NAP1L4,NAPA,P4HB,PDIA6,PSMD2,RAB8A,RBM3,RELA,RPL7,TAGLN2,THBS1,UQCRC1,USO1,VWF,ZYX	34 (2)	2				ID1,TP53	AHR,CA9,CCN2,cholesterol,EGFR,FYN,HIF1A,MUC5AC,SERPINE2,STX1A,VWF
E2F3	transcription regulator		2			0.333	2.4e-09	0.0066	CDK2,E2F3,Jnk,RB1,TP53	ACTB,AHCY,APOE,ATP1A1,ATP5F1C,CD9,CNN3,COX6B1,DBI,FABP5,FKBP4,FUBP1,GSK3A,HSPA5,HSPD1,ILK,ITGA2B,LASP1,LTB4R,MAPRE2,MT-CO2,NAP1L4,NUCKS1,OLR1,P4HB,PCYT1A,PDIA6,PSMD2,RAB8A,RBM3,RELA,RPL7,TAGLN2,THBS1,USO1,ZYX	36 (5)	5	EGFR,KLF3,TFDP1,TFDP2	CHEK1,CHEK2,Gamma tubulin,HIF1A,mir-34,TRIM28		BIRC5,CCNE1,EDN1,FBXO5,mir-10,MLH1,PLK1,PTTG1,TOPBP1	AKR1C3,TP53
BMS-214662	chemical drug		3	Inhibited		-2.364	2.44e-09	0.0445	AKT1,BAX,BMS-214662,BRCA1,CASP3,CASP8,CASP9,CDK2,CDKN1A,CDKN1B,CDX2,CEBPB,CREB1,CTNNB1,DICER1,E2F1,E2F3,ERK,farnesyl transferase,FOXO1,HRAS,IL18,Mek,MYC,MYOD1,NCOA1,NFkB (complex),PAK2,PTEN,RB1,SMARCA4,SNAI2,SOX2,SP1,STAT3,TP53,WT1	APRT,ATP5F1C,ATP5PO,B2M,CCT3,CD55,CDC42,CNN3,CYCS,DBI,EIF3I,ERP29,FABP5,FKBP4,GLRX5,GNB1,GSK3A,GSTO1,HINT1,HNRNPA2B1,HNRNPD,HNRNPH1,HNRNPM,HSPE1,ILK,ITGA2B,LASP1,NAP1L4,NUCKS1,NUDC,P4HB,PCYT1A,PDIA6,PLIN3,PPIA,PPIB,PRKAR2B,PSMD2,PXN,RAB43,RAB8A,RBM3,RBMX,RPL7,S100A9,SEC23A,SEPTIN2,SET,SH3KBP1,SLC16A3,SYNCRIP,TES,TUBB1,U2AF1/U2AF1L5,UBE2I,UQCRC1,USO1,WIPF1	58 (37)	33
flufenamic acid	chemical drug		3			-0.124	2.49e-09	0.0346	26s Proteasome,AR,aspirin,ATF4,CCNE1,CREB1,EGFR,EIF2AK3,ERBB2,ESR1,flufenamic acid,glucocorticoid,HIF1A,IL2,MAPK7,NCOA2,NFE2L2,NR4A1,P38 MAPK,Pka,Pkc(s),PPARA,PPARG,SMAD4,SREBF2,STAT5a/b,STAT6,STK11,STUB1,TCF7L2,TP53,TRPV1	AHCY,ALDOC,APOE,ATP5F1C,ATP5PO,ATP6AP1,AVIL,CBFB,CCT3,CCT5,CD55,CHMP1B,CNN3,COX6B1,CYCS,DBI,DHRS7,DNM3,DSC1,FABP3,FKBP4,FUBP1,GNB1,GSK3A,GSTO1,HNRNPH1,HNRNPH3,HSPA5,HSPE1,HUWE1,LTB4R,MAPRE2,MMP25,MT-CO2,NAP1L4,NAPA,NUCKS1,NUDC,OLR1,P4HB,PABPC1,PCYT1A,PDE4D,PDIA6,PGLS,PLIN3,PPIA,PPIB,PSMD2,PSMD6,RAB5B,RAB8A,RBM3,RBMX,RPL7,S100A9,SAMD9,SEC23A,SF1,SLC44A2,TES,TMOD3,TUBB1,UQCRC1,WIPF1	65 (32)	30					CGA,KLK3
GZMB	peptidase	2.468	2			-0.667	2.51e-09	0.0059	CASP8,caspase,F2R,GZMB,NOTCH1,TP53	AHCY,APOE,ATP1A1,ATP5F1C,CD55,CNN3,DBI,FABP5,FCER1G,FKBP4,FUBP1,GSK3A,HSPA5,HSPD1,ILK,ITGA2B,LASP1,LTB4R,MAPRE2,MIF,MT-CO2,NAP1L4,P4HB,PDIA6,PSMD2,RAB8A,RBM3,RELA,RPL7,S100A9,TAGLN2,THBS1,UQCRC1,USO1,VWF,ZYX	36 (6)	5	CD28,CD3,CD3-TCR,cytarabine,EGFR,FSH,Immunoglobulin,TCR	CBLB,cyclosporin A,MDK,N-acetyl-L-cysteine		F2R,TP53
ARG2	enzyme		3	Activated		2.111	2.55e-09	0.0248	26s Proteasome,ARG1,ARG2,arginase,BAX,Ca2+,EGFR,EIF4EBP1,HIF1A,IRS2,LIPE,MAPK1,mitomycin C,MTOR,MYC,NFKB1,Nos,NOS2,Pkc(s),PLC,PLCG1,PLCG2,PRKCA,PRKCE,STAT4,TLR3	ACTB,AHCY,ALDOC,ATP5PO,AVIL,CCT3,CCT5,CD55,CD9,CDC42,COX6B1,CYCS,DBI,ERP29,GLRX3,GLRX5,GSK3A,HNRNPA2B1,HNRNPD,HNRNPH1,HSPD1,HSPE1,HUWE1,KHSRP,MT-CO2,NUCKS1,NUDC,NUDT21,PABPC1,PDIA6,PEBP1,PGP,PLIN3,PPIA,PPIB,PSMD2,PSMD6,RELA,RPL7,S100A9,TAGLN2,TES,UQCRC1,WIPF1	44 (26)	22	AHR,IL4,Insulin,levodopa,metribolone,RUNX1-RUNX1T1	CA9		arginase	HIF1A
SMAD7	transcription regulator		2			0.973	2.56e-09	0.0173	Akt,AKT1,CASP8,CDK2,EGFR,MAP2K3,MAP3K7,MAPK8,NFkB (complex),NFKB1,NFKBIA,PI3K (complex),RB1,RELA,RHOA,SMAD2,Smad2/3,SMAD3,SMAD7,STAT3,TGFBR1	APOE,ATP1A1,B2M,CBFB,CCT5,CD9,COX6B1,CTSZ,FABP5,FCER1G,HNRNPA2B1,HNRNPD,HNRNPH1,HNRNPM,HSPD1,HSPE1,ILK,KHSRP,LASP1,MPDU1,MPPE1,NUDC,PABPC1,PCYT1A,PPIA,PRKAR2B,PXN,RELA,RNASEL,S100A9,SH3KBP1,SLC16A3,STK4,SYTL1,THBS1,UQCRC1,WIPF1,ZYX	38 (21)	21	APP,HIF1A,Insulin,RB1CC1,STX2,TCR,YY1	actinomycin D,FSH,GABA,L-methionine,SKI,TP53		APOC3,CCNB1,Cyclin A,Cyclin B,CYP1A2,DNMT3B,EGFR,TXN	CCN2,Collagen type IV,DCN,FN1,FURIN,MTORC1,MTORC2,NFKB1,RHOA,SMAD1/5
PTTG1	transcription regulator		2			0.822	2.58e-09	0.0093	CDK2,FGF2,PTTG1,RB1,TP53	ACTB,AHCY,APOE,ATP1A1,ATP5F1C,B2M,CBFB,CNN3,COX6B1,DBI,FABP5,FKBP4,FUBP1,GSK3A,HSPA5,HSPD1,ILK,ITGA2B,LASP1,LTB4R,MAPRE2,MIF,MT-CO2,NAP1L4,OLR1,P4HB,PCYT1A,PDIA6,PSMD2,RAB8A,RBM3,RELA,RPL7,TAGLN2,THBS1,USO1,ZYX	37 (5)	5	BIRC5,BUB1B,E2F3,ESR1,proTAME,TFDP1	APC-CDC20,Rbx1,Ubiquitin		CEBPD,Cyclin A,IgG,Immunoglobulin	APEX1,CHEK1,D-glucose,HIF1A,MLH1,WRN,XRCC6
TAB1	enzyme		2			-0.617	2.62e-09	0.0337	ATF2,CHUK,ERK1/2,IKBKB,IKBKG,JUN,MAP2K3,MAP3K7,Map3k7,MAPK8,NFkB (complex),NFKB1,P38 MAPK,TAB1,TP53	ACTB,AHCY,ATP1A1,ATP5F1C,B2M,CD55,CNN3,CTSZ,CYCS,DBI,FABP5,FKBP4,FUBP1,GSK3A,HNRNPA2B1,HSPD1,ILK,KHSRP,LASP1,LTB4R,MAPRE2,MIF,MT-CO2,NAP1L4,OLR1,P4HB,PDIA6,PSMD2,PXN,RAB8A,RBM3,RELA,RNASEL,RPL7,S100A9,SLC16A3,STK4,SYTL1,TAGLN2,UQCRC1,USO1,ZYX	42 (15)	15	anisomycin,EGFR	RNF114		JUN,NFKB1,TP53	GBP1,RGS2
SOX2-OCT4-NANOG	complex		3			-0.457	2.72e-09	0.0165	AKT1,GLI1,NANOG,POU5F1,SNAI2,SOX2,SOX2-OCT4-NANOG,TP53	AHCY,ALDOC,APOE,ATP1A1,ATP5F1C,CD9,CDC42,CNN3,DBI,FABP5,FKBP4,FUBP1,GSK3A,HNRNPH1,HNRNPM,HSPA5,HSPD1,HUWE1,ILK,ITGA2B,LASP1,LTB4R,MAPRE2,MT-CO2,NAP1L4,OLR1,P4HB,PDIA6,PSMD2,RAB8A,RAB8B,RBM3,RELA,RNASEL,RPL7,S100A9,SEPTIN2,SET,TAGLN2,UQCRC1,USO1,WIPF1,ZYX	43 (8)	8					NEUROG1
pantoprazole	chemical drug		3			0.143	2.8e-09	0.0414	2-amino-1-methyl-6-phenylimidazo-4-5-b-pyridine,26s Proteasome,ABCG2,Akt,AR,aristolochic acid I,Creb,CYP1A1,CYP1A2,CYP3A4,docetaxel,ERK,GLI1,IRF3,monocrotaline,MPO,NFE2L2,NFkB (complex),NFKB1,NFKBIA,pantoprazole,Pkc(s),PLG,PRKAA2,RELA,SMAD3,STAT3	ATP1A1,ATP6AP1,B2M,CCT3,CCT5,CD55,CD9,CNN3,COX6B1,CTSZ,CYCS,ERP29,FABP5,FCER1G,FKBP4,GSTO1,HSP90B1,HSPD1,HSPE1,HUWE1,ITGA2B,KHSRP,MIF,MPDU1,MPPE1,MT-CO2,OLR1,P4HB,PDIA6,PLIN3,PPIA,PPIB,PRKAR2B,PSMA2,PSMD2,PSMD6,RAB8B,RELA,RNASEL,S100A9,SEC23A,SH3KBP1,SLC16A3,STK4,SYTL1,TUBB1,UBE2I,USO1,ZYX	49 (27)	21				CYP1A2	MPO
sepiapterin	chemical - endogenous mammalian		3			1.896	2.88e-09	0.0475	Akt,AKT1,BAX,CD247,doxorubicin,EGFR,ERK,HMGA1,INSR,IRS2,MTOR,MYC,NOS2,NOS3,p70 S6k,PDE5A,PDX1,PRKG1,RELA,sepiapterin,STAT3,STAT4,TLR3,ZAP70	AHCY,ALDOC,ATP1A1,ATP5PO,AVIL,CCT3,CCT5,CD9,COX6B1,CYCS,DBI,GLRX3,GLRX5,GSK3A,HINT1,HNRNPA2B1,HNRNPD,HNRNPH1,HNRNPM,HSPE1,ILK,ITGA2B,MPPE1,NUDC,NUDT21,P4HB,PABPC1,PDIA6,PGP,PPIA,PPIB,PRKAR2B,RBM3,RELA,RPL7,S100A9,SEPTIN2,SH3KBP1,STK4,SYTL1,TAGLN2,TES,UBE2I,UQCRC1,VPS4B,WIPF1,ZYX	47 (24)	21					LCN2
docetaxel	chemical drug		2			-1.206	2.91e-09	0.0426	Akt,BAK1,BCR-ABL1,docetaxel,Hsp90,NFkB (complex),P38 MAPK,RELA,STAT3,TP53,YAP1	AHCY,APOE,ATP1A1,ATP5F1C,B2M,CD55,CD9,CNN3,DBI,DNAJB1,FABP5,FCER1G,FKBP4,FUBP1,GSK3A,HSPD1,ILK,ITGA2B,LASP1,LTB4R,MAPRE2,MIF,MMP25,MPPE1,MT-CO2,NAP1L4,P4HB,PDIA6,PSMD2,PXN,RAB8A,RBM3,RPL7,SH3KBP1,SLC16A3,STK4,SYTL1,TAGLN2,THBS1,TUBB1,UQCRC1,USO1,WIPF1,ZYX	44 (11)	11				AURKA,BUB1,CCNB1,CDC20,miR-30a-3p (and other miRNAs w/seed UUUCAGU),miR-30c-5p (and other miRNAs w/seed GUAAACA),NEK2,PRKCA,TNFSF10,TP53	BCR-ABL1,BIRC5,CHEK2,Cyclin A,Cyclin B,EGFR,ITGAV,KLK3,mir-10,TFDP1,YWHAZ
INCENP	other		3			0.333	2.95e-09	0.0085	APC (complex),AURKB,BIRC5,GMNN,HSF2,INCENP,PKM,PTTG1,RASSF1,TP53	AHCY,APOE,ATP1A1,ATP5F1C,CCT3,CCT5,CNN3,DBI,FABP5,FKBP4,FUBP1,GSK3A,HSPD1,ILK,ITGA2B,LASP1,LTB4R,MAPRE2,MIF,MT-CO2,NAP1L4,NUDT21,P4HB,PDIA6,PGLS,PSMD2,RAB8A,RBM3,RPL7,TAGLN2,THBS1,TUBB1,UQCRC1,USO1,VWF,ZYX	36 (10)	7	AURKA,ESR1,mibolerone
FLI1	transcription regulator		3			1	2.99e-09	0.041	26s Proteasome,AKT1,APP,AR,BIRC5,CCNE1,CDK1,Creb,CREB1,E2F1,EGFR,ERBB2,ESR1,FLI1,FOS,GATA2,HIF1A,HIPK2,HMGA1,JUNB,KAT5,MAPK1,MAPK7,MASTL,MDM2,MYCN,NCOA2,NFkB (complex),Pka,RELA,RUNX3,SMAD4,SOX2,SP1,SREBF2,STUB1,TP53,TP63,TSC1,YAP1	ACOT1,AHCY,ALDOC,ATP5F1C,ATP6AP1,AVIL,CBFB,CCT3,CCT5,CDC42,CNN3,COX6B1,DBI,DNM3,DSC1,EIF3I,ERP29,FABP5,FKBP4,FUBP1,GLRX,GNB1,HINT1,HNRNPH1,HNRNPM,HSPA5,HSPD1,HUWE1,ILK,ITGA2B,KHSRP,LASP1,MMP25,MT-CO2,MYL12A,NAP1L4,NUCKS1,NUDC,NUDT21,PABPC1,PCYT1A,PDE4D,PDIA6,PLIN3,PPIA,PSMA2,PSMD6,PXN,RAB11FIP1,RAB5B,RBM3,RBMX,RELA,RNASEL,S100A9,SEPTIN2,SLC16A3,SLC44A2,SYTL1,TMOD3,TUBB1,USO1,VWF,WIPF1	64 (40)	39				ITGA2B
C1D	transcription regulator		3			-1.871	3.03e-09	0.0491	Akt,AKT1,AKT3,AR,C1D,CTNNB1,ESR1,FOS,GLI1,Hsp90,JUN,KAT2A,NFKBIA,PRKDC,SNAI1,STK11,TCF7L2,TP53,ZIC2	APOE,ATP1A1,ATP5F1C,ATP5PO,ATP6AP1,AVIL,CCT3,CD55,CDC42,CHMP1B,CTSZ,CYCS,DBI,DHRS7,DNAJB1,DSC1,FABP5,FUBP1,GNB1,GSK3A,HNRNPD,HNRNPM,HSP90B1,HSPE1,HUWE1,ILK,ITGA2B,LASP1,LTB4R,MAPRE2,MPDU1,MPPE1,NAP1L4,NUDC,P4HB,PDIA6,PEBP1,PGLS,PLIN3,PSMA2,PSMD2,RAB5B,RAB8A,RAB8B,RBM3,RNASEL,RPL7,SAMD9,SLC16A3,SLC44A2,STK4,TAGLN2,UBE2I,USO1,WIPF1,ZYX	56 (19)	17
NPY2R	G-protein coupled receptor		3			-1.982	3.04e-09	0.0346	ADCY,Akt,AKT1,Creb,cyclic AMP,EGFR,G protein alphai,GLI1,ITGA5,MAPK1,MAPK8,NFkB (complex),NPY2R,PI3K (complex),Pka,PRKAA1,RELA,STAT5a/b,STK11,TRPM8	ACTB,AHCY,ATP5F1C,AVIL,CCT5,CDC42,COX6B1,CYCS,ERP29,FABP5,FCER1G,HNRNPA2B1,HNRNPD,HNRNPH1,HNRNPM,HSPE1,HUWE1,ITGA2B,LASP1,MIF,MPPE1,NUDC,PABPC1,PDE4D,PLIN3,PPIA,PXN,RAB8B,RBM3,RNASEL,S100A9,SH3KBP1,SLC16A3,STK4,SYTL1,TAGLN2,THBS1,TUBB1,UBE2I,UQCRC1,VWF,WIPF1,ZYX	43 (20)	19
STX2	transporter	1.411	3			-0.508	3.08e-09	0.0187	AGT,APP,BAX,CASP3,CREB1,CTNNB1,CXCL12,EGFR,ERBB2,HIF1A,HRAS,KLF11,KRAS,MAPK1,MMP9,MTOR,NFKBIA,PARP1,PTEN,RELA,SP1,SRC (family),STAT3,STAT5a/b,STAT5B,STAT6,STX2,TGFB1,TNF,VEGFA,WBP2,YAP1	ACOT1,ACTB,ATP1A1,ATP5PO,AVIL,CBFB,CCT5,CD9,CDC42,CNN3,COX6B1,DBI,EIF4H,ERP29,FABP3,FKBP2,GNB1,HINT1,HNRNPA2B1,HNRNPC,HNRNPD,HNRNPH1,HNRNPH3,HSP90B1,HSPA5,HSPE1,HUWE1,MMP25,MMRN1,MPDU1,MT-CO2,MYL12A,NUCKS1,NUDC,PABPC1,PDE4D,PDIA6,PGP,PPIA,PPIB,PSMC6,RAB43,RBM3,RBMX,RELA,RNASEL,SAMD9,SEC23A,SEPTIN2,SEPTIN7,SH3KBP1,SRI,STK4,SYNCRIP,SYTL1,TAGLN2,TES,THBS1,TMOD3,TUBB1,UQCRC1,USO1	62 (32)	30		GnRH analog		SMAD7	EGFR
TRIM41	other		3			-0.13	3.09e-09	0.0329	26s Proteasome,AKT1,AR,ATF2,CCNE1,CHUK,Creb,CREB1,EGFR,EIF4E,ERBB2,ESR1,HIF1A,IKBKB,JAK2,KRAS,MAPK7,NCOA2,NFKBIA,NR4A1,Pka,PRKCB,RGS2,SREBF2,STUB1,TEAD1,TP53,TP73,TRIM41,VEGFA	ACOT1,ACTB,ALDOC,ATP5F1C,ATP6AP1,CBFB,CCT3,CCT5,CD9,CNN3,COX6B1,CTSZ,CYCS,DNM3,DSC1,FABP3,FABP5,FKBP4,FUBP1,GNB1,GSK3A,GSTO1,HNRNPH1,HNRNPM,HSPA5,HSPE1,HUWE1,ILK,LASP1,LTB4R,MPDU1,MT-CO2,NAP1L4,NUCKS1,NUDC,P4HB,PABPC1,PCYT1A,PDE4D,PDIA6,PGLS,PLIN3,PPIA,PPIB,PRKAR2B,PSMC6,PSMD6,RAB5B,RAB8A,RBM3,RBMX,RPL7,SAMD9,SET,SLC44A2,SYNE2,THBS1,USO1,WIPF1	59 (30)	29					PRKCA
PSMC3	enzyme	-1.337	2			-0.343	3.11e-09	0.0042	26s Proteasome,Ap1,PSMC3,TP53	AHCY,APOE,ATP1A1,ATP5F1C,CNN3,DBI,FABP5,FKBP4,FUBP1,GSK3A,HSP90B1,HSPA5,HSPD1,ILK,ITGA2B,LASP1,LTB4R,MAPRE2,MT-CO2,NAP1L4,P4HB,PDIA6,PSMD2,PSMD6,RAB8A,RBM3,RELA,RPL7,TAGLN2,THBS1,UBE2I,UQCRC1,USO1,ZYX	34 (4)	3	1,2-dithiol-3-thione,4-phenylbutyric acid,geldanamycin,SYVN1	NMS-873,RICTOR,UBE2D1,UBE2D2		TP53
iodoacetamide	chemical reagent		2	Activated		2.137	3.15e-09	0.0103	FASN,GAPDH,iodoacetamide,NFE2L2,TGFB1	APOE,ATP1A1,CBFB,CCT3,CCT5,CD55,CD9,CNN3,CORO1C,EIF4H,ERP29,FABP5,FCER1G,FKBP2,FUBP1,GSTO1,HINT1,HNRNPC,HNRNPH1,HSP90B1,HSPA5,ILK,LASP1,MT-CO2,MYL12A,PDE4D,PDIA6,PPIB,PRKAR2B,PXN,RBM3,SEC23A,SRI,THBS1,TMOD3,USO1,ZYX	37 (5)	4
TRH	other		2			-0.905	3.17e-09	0.031	CREBBP,EGFR,FOS,JUN,L-triiodothyronine,MAP2K1/2,MAPK1,PRKCA,TP53,TRH	ACTB,AHCY,ATP1A1,ATP5F1C,B2M,CCT5,CD55,CNN3,CYCS,DBI,ERP29,FABP5,FKBP4,FUBP1,GSK3A,HINT1,HNRNPD,HNRNPH1,HSP90B1,HSPA5,HSPD1,HSPE1,ILK,LASP1,LTB4R,MAPRE2,MT-CO2,NAP1L4,NUDC,P4HB,PABPC1,PDIA6,PPIA,PSMA2,PSMD2,RAB8A,RBM3,RPL7,TAGLN2,UBE2I,UQCRC1,USO1,WIPF1,ZYX	44 (10)	10		ADCYAP1		ANGPT2,CGA,EGFR,F2R,JUN,PRKCA,PRL,TSH	F2,TP53
TOPBP1	other		2			-0.169	3.2e-09	0.0064	CCNE1,CDK2,E2F1,TOPBP1,TP53	AHCY,APOE,ATP1A1,ATP5F1C,CD9,CNN3,DBI,EIF3I,FABP5,FKBP4,FUBP1,GSK3A,HSP90B1,HSPA5,HSPD1,HSPE1,ITGA2B,LASP1,LTB4R,MAPRE2,MT-CO2,NAP1L4,NUDC,P4HB,PCYT1A,PDIA6,RAB8A,RBM3,RELA,RPL7,TAGLN2,THBS1,UQCRC1,USO1,ZYX	35 (5)	4	E2F3	CD 437,PAX3-FOXO1,UBR5		ATR,BLM,CCNE1,CHEK1	CHEK2,TP53
[truncated: 1,573 more rows]
